# Supplementary material for: Orthologs of Human Disease Associated Genes and RNAi Analysis of Silencing Insulin Receptor Gene in Bombyx mori
Source: Int J Mol Sci. 2014 Oct 9;15(10):18102–16. doi: 10.3390/ijms151018102 (PMC4227205; doi:10.3390/ijms151018102)
Supplement: Supplementary File 1 [file ijms-15-18102-s001.xls]

## Sheet: Growth
Table S1-1. Growth disease.
Accession numbers of human genes	SilkDB ID	Identity	Alignment Residues Amino Acid Length	Evalue	Drosophila Melanogaster Orthologs	Disorder
NP_997637.1	BGIBMGA004096	0.4	348	2e-63	FBpp0087524	101800 acrodysostosis 1, with or without hormone resistance; acrdys1; 160980 carney complex, type 1; cnc1; 255960 myxoma, intracardiac; 610489 pigmented nodular adrenocortical disease, primary, 1; ppnad1; 188550 thyroid carcinoma, papillary;
NP_997637.1	BGIBMGA008855	0.26	149	4e-06	FBpp0088350	101800 acrodysostosis 1, with or without hormone resistance; acrdys1; 160980 carney complex, type 1; cnc1; 255960 myxoma, intracardiac; 610489 pigmented nodular adrenocortical disease, primary, 1; ppnad1; 188550 thyroid carcinoma, papillary;
NP_997637.1	BGIBMGA008856	0.36	64	6e-07	FBpp0290613	101800 acrodysostosis 1, with or without hormone resistance; acrdys1; 160980 carney complex, type 1; cnc1; 255960 myxoma, intracardiac; 610489 pigmented nodular adrenocortical disease, primary, 1; ppnad1; 188550 thyroid carcinoma, papillary;
NP_997637.1	BGIBMGA011694	0.69	372	2e-142	FBpp0289762	101800 acrodysostosis 1, with or without hormone resistance; acrdys1; 160980 carney complex, type 1; cnc1; 255960 myxoma, intracardiac; 610489 pigmented nodular adrenocortical disease, primary, 1; ppnad1; 188550 thyroid carcinoma, papillary;
NP_001166031.1	BGIBMGA006675	0.43	294	7e-60	FBpp0305089	102200 pituitary adenoma, growth hormone-secreting;
NP_001166031.1	BGIBMGA008534	0.26	272	1e-19	FBpp0301972	102200 pituitary adenoma, growth hormone-secreting;
NP_001166031.1	BGIBMGA011685	0.29	121	2e-06	FBpp0083284	102200 pituitary adenoma, growth hormone-secreting;
NP_001070957.1	BGIBMGA004269	0.68	379	5e-148	FBpp0309944	102200 pituitary adenoma, growth hormone-secreting; 174800 mccune-albright syndrome; mas; 166350 osseous heteroplasia, progressive; poh; 103580 pseudohypoparathyroidism, type ia; php1a; 603233 pseudohypoparathyroidism, type ib; php1b; 612462 pseudohypoparathyroidism, type ic; php1c; 612463 pseudopseudohypoparathyroidism; pphp;
NP_001070957.1	BGIBMGA004344	0.74	379	3e-163	FBpp0309944	102200 pituitary adenoma, growth hormone-secreting; 174800 mccune-albright syndrome; mas; 166350 osseous heteroplasia, progressive; poh; 103580 pseudohypoparathyroidism, type ia; php1a; 603233 pseudohypoparathyroidism, type ib; php1b; 612462 pseudohypoparathyroidism, type ic; php1c; 612463 pseudopseudohypoparathyroidism; pphp;
NP_536351.1	BGIBMGA009786	0.45	166	2e-35	FBpp0075113	102200 pituitary adenoma, growth hormone-secreting; 174800 mccune-albright syndrome; mas; 166350 osseous heteroplasia, progressive; poh; 103580 pseudohypoparathyroidism, type ia; php1a; 603233 pseudohypoparathyroidism, type ib; php1b; 612462 pseudohypoparathyroidism, type ic; php1c; 612463 pseudopseudohypoparathyroidism; pphp;
CAI42936.1	BGIBMGA013566	0.47	148	2e-41	FBpp0309829	102200 pituitary adenoma, growth hormone-secreting; 174800 mccune-albright syndrome; mas; 166350 osseous heteroplasia, progressive; poh; 103580 pseudohypoparathyroidism, type ia; php1a; 603233 pseudohypoparathyroidism, type ib; php1b; 612462 pseudohypoparathyroidism, type ic; php1c; 612463 pseudopseudohypoparathyroidism; pphp;
NP_000013.2	BGIBMGA001278	0.29	174	1e-08	FBpp0081451	102700 severe combined immunodeficiency, autosomal recessive, t cell-negative, b cell-negative, nk cell-negative, due to adenosine deaminase deficiency;
AAA60104.1	BGIBMGA002508	0.61	504	9e-172	FBpp0083611	102900 adenosine triphosphate, elevated, of erythrocytes; 266200 pyruvate kinase deficiency of red cells;
AAA60104.1	BGIBMGA007981	0.28	159	7e-06	FBpp0083611	102900 adenosine triphosphate, elevated, of erythrocytes; 266200 pyruvate kinase deficiency of red cells;
NP_870986.1	BGIBMGA007982	0.45	53	5e-09	FBpp0083611	102900 adenosine triphosphate, elevated, of erythrocytes; 266200 pyruvate kinase deficiency of red cells;
AAA60104.1	BGIBMGA013559	0.3	511	1e-59	FBpp0083611	102900 adenosine triphosphate, elevated, of erythrocytes; 266200 pyruvate kinase deficiency of red cells;
NP_000017.1	BGIBMGA007119	0.69	396	2e-147	FBpp0082816	103050 adenylosuccinase deficiency;
AAA36372.1	BGIBMGA002937	0.49	1058	0	FBpp0310415	104300 alzheimer disease; ad; 189800 preeclampsia/eclampsia 1; pee1; 145500 hypertension, essential; 601367 stroke, ischemic;
AAA36372.1	BGIBMGA002938	0.46	1091	0	FBpp0079777	104300 alzheimer disease; ad; 189800 preeclampsia/eclampsia 1; pee1; 145500 hypertension, essential; 601367 stroke, ischemic;
NP_570854.1	BGIBMGA001267	0.45	851	0	FBpp0075916	105830 angelman syndrome; as;
NP_570854.1	BGIBMGA007539	0.3	254	9e-24	FBpp0306924	105830 angelman syndrome; as;
NP_570854.1	BGIBMGA010628	0.26	280	3e-18	FBpp0079663	105830 angelman syndrome; as;
NP_570854.1	BGIBMGA012577	0.38	434	3e-79	FBpp0072564	105830 angelman syndrome; as;
NP_003150.1	BGIBMGA001550	0.36	289	1e-43	FBpp0070723	105830 angelman syndrome; as; 300672 epileptic encephalopathy, early infantile, 2; eiee2;
NP_003150.1	BGIBMGA003474	0.31	229	1e-24	FBpp0070041	105830 angelman syndrome; as; 300672 epileptic encephalopathy, early infantile, 2; eiee2;
NP_003150.1	BGIBMGA004055	0.38	99	3e-13	FBpp0303824	105830 angelman syndrome; as; 300672 epileptic encephalopathy, early infantile, 2; eiee2;
NP_003150.1	BGIBMGA004790	0.45	289	3e-72	FBpp0292076	105830 angelman syndrome; as; 300672 epileptic encephalopathy, early infantile, 2; eiee2;
NP_003150.1	BGIBMGA004946	0.3	132	1e-15	FBpp0083530	105830 angelman syndrome; as; 300672 epileptic encephalopathy, early infantile, 2; eiee2;
NP_003150.1	BGIBMGA009109	0.49	234	8e-65	FBpp0292076	105830 angelman syndrome; as; 300672 epileptic encephalopathy, early infantile, 2; eiee2;
NP_003150.1	BGIBMGA009883	0.39	283	8e-45	FBpp0304962	105830 angelman syndrome; as; 300672 epileptic encephalopathy, early infantile, 2; eiee2;
NP_004983.1	BGIBMGA001425	0.53	62	8e-09	FBpp0081546	105830 angelman syndrome; as; 300673 encephalopathy, neonatal severe, due to mecp2 mutations; 300260 lubs x-linked mental retardation syndrome; mrxsl; 300055 mental retardation, x-linked, syndromic 13; mrxs13; 312750 rett syndrome; rtt; 300496 autism, susceptibility to, x-linked 3; autsx3;
CAA61599.1	BGIBMGA003413	0.32	87	2e-06	FBpp0082081	105830 angelman syndrome; as; 300673 encephalopathy, neonatal severe, due to mecp2 mutations; 300260 lubs x-linked mental retardation syndrome; mrxsl; 300055 mental retardation, x-linked, syndromic 13; mrxs13; 312750 rett syndrome; rtt; 300496 autism, susceptibility to, x-linked 3; autsx3;
NP_004378.1	BGIBMGA010704	0.51	94	3e-18	FBpp0083485	108900 atrial septal defect 7 with or without atrioventricular conduction defects; asd7; 225250 hypothyroidism, congenital, nongoitrous, 5; chng5; 187500 tetralogy of fallot; tof;
NP_001194.1	BGIBMGA007355	0.68	311	2e-126	FBpp0078720	112600 brachydactyly, type a2; bda2; 609441 chondrodysplasia, acromesomelic, with genital anomalies;
NP_004551.2	BGIBMGA010343	0.47	313	6e-83	FBpp0079568	113000 brachydactyly, type b1; bdb1; 268310 robinow syndrome, autosomal recessive; rrs;
NP_003211.1	BGIBMGA004491	0.66	68	2e-20	FBpp0305658	113620 branchiooculofacial syndrome; bofs;
NP_000337.1	BGIBMGA008274	0.25	113	6e-09	FBpp0304134	114290 campomelic dysplasia;
BAG58389.1	BGIBMGA011668	0.49	116	6e-27	FBpp0086702	114290 campomelic dysplasia;
AAD11941.1	BGIBMGA012531	0.3	452	1e-45	FBpp0085368	114500 colorectal cancer; crc; 257300 mosaic variegated aneuploidy syndrome 1; mva1; 176430 premature chromatid separation trait; pcs;
NP_002746.1	BGIBMGA001458	0.68	381	2e-149	FBpp0071248	115150 cardiofaciocutaneous syndrome 1; cfc1;
NP_002746.1	BGIBMGA005641	0.37	316	7e-52	FBpp0073551	115150 cardiofaciocutaneous syndrome 1; cfc1;
NP_002746.1	BGIBMGA007238	0.37	321	8e-47	FBpp0306434	115150 cardiofaciocutaneous syndrome 1; cfc1;
NP_002746.1	BGIBMGA007646	0.38	295	2e-48	FBpp0303423	115150 cardiofaciocutaneous syndrome 1; cfc1;
NP_904325.2	BGIBMGA000816	0.46	557	5e-126	FBpp0293213	118210 charcot-marie-tooth disease, axonal, type 2a1; cmt2a1; 171300 pheochromocytoma; 256700 neuroblastoma, susceptibility to;
NP_904325.2	BGIBMGA003619	0.55	82	1e-17	FBpp0312023	118210 charcot-marie-tooth disease, axonal, type 2a1; cmt2a1; 171300 pheochromocytoma; 256700 neuroblastoma, susceptibility to;
NP_055889.2	BGIBMGA003620	0.38	655	2e-97	FBpp0302989	118210 charcot-marie-tooth disease, axonal, type 2a1; cmt2a1; 171300 pheochromocytoma; 256700 neuroblastoma, susceptibility to;
NP_904325.2	BGIBMGA004997	0.33	127	2e-18	FBpp0293213	118210 charcot-marie-tooth disease, axonal, type 2a1; cmt2a1; 171300 pheochromocytoma; 256700 neuroblastoma, susceptibility to;
NP_904325.2	BGIBMGA005875	0.29	304	2e-22	FBpp0310067	118210 charcot-marie-tooth disease, axonal, type 2a1; cmt2a1; 171300 pheochromocytoma; 256700 neuroblastoma, susceptibility to;
AAN17742.1	BGIBMGA007234	0.41	231	2e-32	FBpp0089282	118210 charcot-marie-tooth disease, axonal, type 2a1; cmt2a1; 171300 pheochromocytoma; 256700 neuroblastoma, susceptibility to;
NP_904325.2	BGIBMGA007454	0.75	32	9e-08	FBpp0112002	118210 charcot-marie-tooth disease, axonal, type 2a1; cmt2a1; 171300 pheochromocytoma; 256700 neuroblastoma, susceptibility to;
NP_055889.2	BGIBMGA007455	0.52	488	5e-132	FBpp0086227	118210 charcot-marie-tooth disease, axonal, type 2a1; cmt2a1; 171300 pheochromocytoma; 256700 neuroblastoma, susceptibility to;
NP_055889.2	BGIBMGA007456	0.57	120	9e-36	FBpp0112002	118210 charcot-marie-tooth disease, axonal, type 2a1; cmt2a1; 171300 pheochromocytoma; 256700 neuroblastoma, susceptibility to;
NP_904325.2	BGIBMGA010931	0.39	346	6e-57	FBpp0306018	118210 charcot-marie-tooth disease, axonal, type 2a1; cmt2a1; 171300 pheochromocytoma; 256700 neuroblastoma, susceptibility to;
NP_904325.2	BGIBMGA011193	0.3	344	5e-32	FBpp0073083	118210 charcot-marie-tooth disease, axonal, type 2a1; cmt2a1; 171300 pheochromocytoma; 256700 neuroblastoma, susceptibility to;
NP_000205.1	BGIBMGA000783	0.42	681	5e-166	FBpp0310538	118450 alagille syndrome 1; algs1; 187500 tetralogy of fallot; tof;
NP_000205.1	BGIBMGA008395	0.37	265	6e-47	FBpp0073256	118450 alagille syndrome 1; algs1; 187500 tetralogy of fallot; tof;
NP_000205.1	BGIBMGA010195	0.45	385	7e-118	FBpp0293200	118450 alagille syndrome 1; algs1; 187500 tetralogy of fallot; tof;
NP_004339.3	BGIBMGA008907	0.81	73	9e-29	FBpp0303587	119600 cleidocranial dysplasia; ccd;
BAG62163.1	BGIBMGA000207	0.43	480	2e-129	FBpp0304632	121050 arthrogryposis, distal, type 9; da9;
NP_001990.2	BGIBMGA000209	0.39	823	0	FBpp0288716	121050 arthrogryposis, distal, type 9; da9;
NP_001990.2	BGIBMGA006856	0.25	2613	1e-141	FBpp0304631	121050 arthrogryposis, distal, type 9; da9;
NP_001990.2	BGIBMGA010892	0.22	170	8e-06	FBpp0304632	121050 arthrogryposis, distal, type 9; da9;
NP_001990.2	BGIBMGA012379	0.36	201	3e-35	FBpp0304632	121050 arthrogryposis, distal, type 9; da9;
NP_597677.2	BGIBMGA006830	0.41	1438	0	FBpp0290671	122470 cornelia de lange syndrome 1; cdls1;
NP_000465.1	BGIBMGA008990	0.67	97	1e-30	FBpp0311714	123100 craniosynostosis 1; crs1; 101400 saethre-chotzen syndrome; scs;
NP_055217.2	BGIBMGA000923	0.5	82	5e-19	FBpp0305844	124000 mitochondrial complex iii deficiency, nuclear type 1; mc3dn1;
BAG34699.1	BGIBMGA003544	0.54	80	2e-21	FBpp0084648	124000 mitochondrial complex iii deficiency, nuclear type 1; mc3dn1;
NP_001019195.1	BGIBMGA001235	0.75	186	4e-77	FBpp0071507	128230 dystonia, dopa-responsive; drd; 233910 hyperphenylalaninemia, bh4-deficient, b; hpabh4b;
AAH28178.1	BGIBMGA000691	0.26	792	3e-14	FBpp0075796	130020 ehlers-danlos syndrome, type iii; 130050 ehlers-danlos syndrome, type iv, autosomal dominant;
NP_009186.1	BGIBMGA010795	0.59	231	5e-79	FBpp0084130	130070 ehlers-danlos syndrome, progeroid type, 1; edsp1;
NP_009186.1	BGIBMGA010796	0.59	231	2e-77	FBpp0084130	130070 ehlers-danlos syndrome, progeroid type, 1; edsp1;
NP_758859.1	BGIBMGA001497	0.32	233	1e-26	FBpp0297152	130650 beckwith-wiedemann syndrome; bws; 601626 leukemia, acute myeloid; aml; 117550 sotos syndrome 1; sotos1; 277590 weaver syndrome; wvs;
NP_758859.1	BGIBMGA002246	0.49	506	6e-147	FBpp0307022	130650 beckwith-wiedemann syndrome; bws; 601626 leukemia, acute myeloid; aml; 117550 sotos syndrome 1; sotos1; 277590 weaver syndrome; wvs;
AAK92049.1	BGIBMGA003106	0.39	224	1e-40	FBpp0290774	130650 beckwith-wiedemann syndrome; bws; 601626 leukemia, acute myeloid; aml; 117550 sotos syndrome 1; sotos1; 277590 weaver syndrome; wvs;
AAA57253.1	BGIBMGA001836	0.51	654	4e-161	FBpp0112980	132400 epiphyseal dysplasia, multiple, 1; edm1; 177170 pseudoachondroplasia; psach;
NP_997005.1	BGIBMGA007776	0.4	262	8e-43	FBpp0085763	133701 exostoses, multiple, type ii;
NP_997005.1	BGIBMGA010965	0.45	531	3e-133	FBpp0099953	133701 exostoses, multiple, type ii;
NP_005624.2	BGIBMGA000696	0.25	245	1e-22	FBpp0086182	135300 fibromatosis, gingival, 1; gingf1; 610733 noonan syndrome 4; ns4;
NP_005624.2	BGIBMGA007203	0.28	280	3e-27	FBpp0080118	135300 fibromatosis, gingival, 1; gingf1; 610733 noonan syndrome 4; ns4;
NP_005624.2	BGIBMGA011102	0.39	679	3e-111	FBpp0080118	135300 fibromatosis, gingival, 1; gingf1; 610733 noonan syndrome 4; ns4;
NP_002141.1	BGIBMGA005261	0.46	133	2e-26	FBpp0077884	140350 hawkinsinuria; 276710 tyrosinemia, type iii;
NP_002141.1	BGIBMGA005262	0.62	356	3e-124	FBpp0077883	140350 hawkinsinuria; 276710 tyrosinemia, type iii;
NP_004264.2	BGIBMGA004519	0.24	342	2e-19	FBpp0309851	143095 spondyloepiphyseal dysplasia with congenital joint dislocations;
NP_996808.1	BGIBMGA013579	0.31	145	7e-14	FBpp0084503	143860 hyperchlorhidrosis, isolated;
NP_075598.2	BGIBMGA008036	0.47	259	2e-69	FBpp0084248	146110 hypogonadotropic hypogonadism 7 with or without anosmia; hh7; 123150 jackson-weiss syndrome; jws; 147950 hypogonadotropic hypogonadism 2 with or without anosmia; hh2; 166250 osteoglophonic dysplasia; ogd; 101600 pfeiffer syndrome; 190440 trigonocephaly 1; trigno1;
NP_115940.2	BGIBMGA002733	0.47	53	1e-07	FBpp0291029	146110 hypogonadotropic hypogonadism 7 with or without anosmia; hh7; 176400 precocious puberty, central, 1; cppb1;
NP_115940.2	BGIBMGA004424	0.39	80	5e-11	FBpp0291029	146110 hypogonadotropic hypogonadism 7 with or without anosmia; hh7; 176400 precocious puberty, central, 1; cppb1;
NP_115940.2	BGIBMGA004428	0.4	80	4e-12	FBpp0304913	146110 hypogonadotropic hypogonadism 7 with or without anosmia; hh7; 176400 precocious puberty, central, 1; cppb1;
NP_115940.2	BGIBMGA005708	0.36	264	2e-34	FBpp0305932	146110 hypogonadotropic hypogonadism 7 with or without anosmia; hh7; 176400 precocious puberty, central, 1; cppb1;
NP_115940.2	BGIBMGA008802	0.35	127	1e-20	FBpp0290901	146110 hypogonadotropic hypogonadism 7 with or without anosmia; hh7; 176400 precocious puberty, central, 1; cppb1;
NP_115940.2	BGIBMGA009039	0.4	112	1e-21	FBpp0086052	146110 hypogonadotropic hypogonadism 7 with or without anosmia; hh7; 176400 precocious puberty, central, 1; cppb1;
ADR83041.1	BGIBMGA008401	0.43	463	5e-92	FBpp0306282	146300 hypophosphatasia, adult; 241510 hypophosphatasia, childhood; 241500 hypophosphatasia, infantile;
ADR83041.1	BGIBMGA008818	0.46	445	4e-107	FBpp0311651	146300 hypophosphatasia, adult; 241510 hypophosphatasia, childhood; 241500 hypophosphatasia, infantile;
ADR83041.1	BGIBMGA008824	0.46	445	9e-106	FBpp0087603	146300 hypophosphatasia, adult; 241510 hypophosphatasia, childhood; 241500 hypophosphatasia, infantile;
ADR83041.1	BGIBMGA009866	0.47	436	2e-95	FBpp0311826	146300 hypophosphatasia, adult; 241510 hypophosphatasia, childhood; 241500 hypophosphatasia, infantile;
ADR83041.1	BGIBMGA009872	0.43	506	3e-100	FBpp0078050	146300 hypophosphatasia, adult; 241510 hypophosphatasia, childhood; 241500 hypophosphatasia, infantile;
BAA32129.1	BGIBMGA011462	0.46	283	4e-63	FBpp0311651	146300 hypophosphatasia, adult; 241510 hypophosphatasia, childhood; 241500 hypophosphatasia, infantile;
NP_001170991.1	BGIBMGA011463	0.46	176	2e-32	FBpp0078050	146300 hypophosphatasia, adult; 241510 hypophosphatasia, childhood; 241500 hypophosphatasia, infantile;
ADR83041.1	BGIBMGA014304	0.47	478	4e-112	FBpp0087603	146300 hypophosphatasia, adult; 241510 hypophosphatasia, childhood; 241500 hypophosphatasia, infantile;
NP_003473.3	BGIBMGA000414	0.32	109	1e-09	FBpp0307242	147920 kabuki syndrome 1; kabuk1;
AAC51735.1	BGIBMGA002502	0.31	724	9e-83	FBpp0309963	147920 kabuki syndrome 1; kabuk1;
NP_003473.3	BGIBMGA002503	0.71	147	7e-59	FBpp0070347	147920 kabuki syndrome 1; kabuk1;
NP_003473.3	BGIBMGA003897	0.38	64	9e-08	FBpp0085204	147920 kabuki syndrome 1; kabuk1;
NP_003473.3	BGIBMGA004352	0.54	54	7e-16	FBpp0307242	147920 kabuki syndrome 1; kabuk1;
NP_003473.3	BGIBMGA005421	0.3	222	9e-07	FBpp0305773	147920 kabuki syndrome 1; kabuk1;
NP_003473.3	BGIBMGA007859	0.35	173	3e-10	FBpp0307021	147920 kabuki syndrome 1; kabuk1;
NP_003473.3	BGIBMGA008253	0.29	163	1e-08	FBpp0073569	147920 kabuki syndrome 1; kabuk1;
NP_476508.2	BGIBMGA001246	0.5	52	4e-10	FBpp0086129	158810 bethlem myopathy; 254090 ullrich congenital muscular dystrophy; ucmd;
NP_002307.2	BGIBMGA013872	0.33	218	5e-30	FBpp0309708	161200 nail-patella syndrome; nps;
AAP37280.1	BGIBMGA005577	0.86	254	9e-131	FBpp0085365	161800 nemaline myopathy 3; nem3; 255310 myopathy, congenital, with fiber-type disproportion; cftd;
NP_006631.2	BGIBMGA003744	0.49	248	6e-66	FBpp0087870	162100 amyotrophy, hereditary neuralgic; hna;
NP_006631.2	BGIBMGA005490	0.46	290	1e-68	FBpp0074145	162100 amyotrophy, hereditary neuralgic; hna;
NP_006631.2	BGIBMGA009380	0.42	291	2e-65	FBpp0083352	162100 amyotrophy, hereditary neuralgic; hna;
NP_006631.2	BGIBMGA012966	0.44	277	1e-65	FBpp0076897	162100 amyotrophy, hereditary neuralgic; hna;
NP_001017536.1	BGIBMGA010782	0.46	109	3e-23	FBpp0084131	166710 osteoporosis; 277440 vitamin d-dependent rickets, type 2a; vddr2a;
NP_001017536.1	BGIBMGA010783	0.26	172	6e-06	FBpp0084131	166710 osteoporosis; 277440 vitamin d-dependent rickets, type 2a; vddr2a;
ABI63347.1	BGIBMGA001020	0.3	166	1e-14	FBpp0311472	167800 pancreatitis, hereditary; pctt; 614044 trypsinogen deficiency;
AAI28227.1	BGIBMGA001320	0.29	242	2e-21	FBpp0087257	167800 pancreatitis, hereditary; pctt; 614044 trypsinogen deficiency;
NP_002760.1	BGIBMGA007046	0.28	221	2e-21	FBpp0083832	167800 pancreatitis, hereditary; pctt; 614044 trypsinogen deficiency;
NP_002760.1	BGIBMGA011211	0.37	197	1e-36	FBpp0311236	167800 pancreatitis, hereditary; pctt; 614044 trypsinogen deficiency;
NP_002760.1	BGIBMGA012478	0.36	225	3e-25	FBpp0087254	167800 pancreatitis, hereditary; pctt; 614044 trypsinogen deficiency;
ABI63347.1	BGIBMGA013962	0.33	204	1e-28	FBpp0082847	167800 pancreatitis, hereditary; pctt; 614044 trypsinogen deficiency;
NP_005350.1	BGIBMGA010110	0.72	283	6e-98	FBpp0307959	175050 juvenile polyposis/hereditary hemorrhagic telangiectasia syndrome; jpht; 174900 juvenile polyposis syndrome; jps;
NP_000159.3	BGIBMGA004545	0.8	176	8e-85	FBpp0297298	175700 greig cephalopolysyndactyly syndrome; gcps; 146510 pallister-hall syndrome; phs; 174200 polydactyly, postaxial, type a1; papa1; 174700 polydactyly, preaxial iv; 241800 hypothalamic hamartomas;
NP_000159.3	BGIBMGA005001	0.41	68	8e-07	FBpp0311930	175700 greig cephalopolysyndactyly syndrome; gcps; 146510 pallister-hall syndrome; phs; 174200 polydactyly, postaxial, type a1; papa1; 174700 polydactyly, preaxial iv; 241800 hypothalamic hamartomas;
NP_000159.3	BGIBMGA013124	0.44	73	8e-10	FBpp0291128	175700 greig cephalopolysyndactyly syndrome; gcps; 146510 pallister-hall syndrome; phs; 174200 polydactyly, postaxial, type a1; papa1; 174700 polydactyly, preaxial iv; 241800 hypothalamic hamartomas;
NP_073719.1	BGIBMGA003004	0.55	144	4e-28	FBpp0293061	176270 prader-willi syndrome; pws;
NP_073719.1	BGIBMGA008493	0.35	84	1e-08	FBpp0304730	176270 prader-willi syndrome; pws;
NP_002478.1	BGIBMGA009056	0.28	192	1e-10		176270 prader-willi syndrome; pws;
NP_003383.2	BGIBMGA013783	0.58	180	2e-52	FBpp0309792	180700 robinow syndrome, autosomal dominant; drs;
NP_003383.2	BGIBMGA013982	0.59	41	7e-13	FBpp0308474	180700 robinow syndrome, autosomal dominant; drs;
NP_004371.2	BGIBMGA000853	0.67	829	0	FBpp0305701	180849 rubinstein-taybi syndrome 1; rsts1;
EAW85334.1	BGIBMGA001666	0.28	119	3e-06	FBpp0084763	180849 rubinstein-taybi syndrome 1; rsts1;
NP_057653.3	BGIBMGA006719	0.59	74	4e-13	FBpp0303938	181450 ulnar-mammary syndrome; ums;
BAG65418.1	BGIBMGA012897	0.94	54	5e-26	FBpp0301040	181450 ulnar-mammary syndrome; ums;
AAF61207.1	BGIBMGA012898	0.81	83	4e-33	FBpp0289836	181450 ulnar-mammary syndrome; ums;
NP_002461.2	BGIBMGA002056	0.23	311	1e-09	FBpp0077250	193700 arthrogryposis, distal, type 2a; da2a; 601680 arthrogryposis, distal, type 2b; da2b;
CAA31492.1	BGIBMGA008519	0.18	954	1e-12	FBpp0303631	193700 arthrogryposis, distal, type 2a; da2a; 601680 arthrogryposis, distal, type 2b; da2b;
NP_002461.2	BGIBMGA008969	0.19	359	2e-08	FBpp0292047	193700 arthrogryposis, distal, type 2a; da2a; 601680 arthrogryposis, distal, type 2b; da2b;
CAA31492.1	BGIBMGA010645	0.21	463	2e-13	FBpp0297775	193700 arthrogryposis, distal, type 2a; da2a; 601680 arthrogryposis, distal, type 2b; da2b;
NP_002461.2	BGIBMGA010912	0.23	342	6e-07	FBpp0290805	193700 arthrogryposis, distal, type 2a; da2a; 601680 arthrogryposis, distal, type 2b; da2b;
CAA35942.1	BGIBMGA013780	0.25	254	6e-06	FBpp0304727	193700 arthrogryposis, distal, type 2a; da2a; 601680 arthrogryposis, distal, type 2b; da2b;
NP_002461.2	BGIBMGA014170	0.23	206	4e-06	FBpp0112323	193700 arthrogryposis, distal, type 2a; da2a; 601680 arthrogryposis, distal, type 2b; da2b;
NP_004230.2	BGIBMGA000895	0.21	611	3e-10	FBpp0294057	200600 achondrogenesis, type ia; acg1a;
CAE46015.1	BGIBMGA007515	0.21	757	1e-18	FBpp0112136	200600 achondrogenesis, type ia; acg1a;
NP_004230.2	BGIBMGA007740	0.2	689	9e-17	FBpp0071945	200600 achondrogenesis, type ia; acg1a;
CAA73095.1	BGIBMGA008150	0.22	910	1e-44	FBpp0310129	200600 achondrogenesis, type ia; acg1a;
NP_004230.2	BGIBMGA011644	0.19	490	1e-10	FBpp0075816	200600 achondrogenesis, type ia; acg1a;
CAE46015.1	BGIBMGA011821	0.22	654	8e-19	FBpp0292437	200600 achondrogenesis, type ia; acg1a;
NP_004230.2	BGIBMGA013032	0.2	461	4e-09	FBpp0308521	200600 achondrogenesis, type ia; acg1a;
NP_940927.2	BGIBMGA005777	0.36	316	3e-44	FBpp0312027	200990 acrocallosal syndrome; acls; 614120 hydrolethalus syndrome 2; hls2;
NP_940927.2	BGIBMGA009884	0.38	326	1e-51	FBpp0297760	200990 acrocallosal syndrome; acls; 614120 hydrolethalus syndrome 2; hls2;
NP_940927.2	BGIBMGA010383	0.25	344	5e-20	FBpp0307854	200990 acrocallosal syndrome; acls; 614120 hydrolethalus syndrome 2; hls2;
NP_899050.1	BGIBMGA001823	0.28	110	5e-06	FBpp0086009	201000 carpenter syndrome 1; crpt1;
NP_899050.1	BGIBMGA012644	0.7	124	5e-41	FBpp0078376	201000 carpenter syndrome 1; crpt1;
NP_899050.1	BGIBMGA014349	0.77	52	3e-13	FBpp0078376	201000 carpenter syndrome 1; crpt1;
NP_570901.2	BGIBMGA003180	0.3	386	4e-45	FBpp0112084	201100 acrodermatitis enteropathica, zinc-deficiency type; aez;
NP_000008.1	BGIBMGA006977	0.49	327	2e-78	FBpp0083227	201470 acyl-coa dehydrogenase, short-chain, deficiency of; acadsd;
NP_000008.1	BGIBMGA013140	0.71	396	5e-146	FBpp0083227	201470 acyl-coa dehydrogenase, short-chain, deficiency of; acadsd;
NP_722540.1	BGIBMGA002862	0.38	50	1e-06	FBpp0073974	202370 peroxisome biogenesis disorder 2b; pbd2b; 214100 peroxisome biogenesis disorder 1a (zellweger); pbd1a;
CAG46874.1	BGIBMGA004381	0.28	325	2e-20	FBpp0305589	202370 peroxisome biogenesis disorder 2b; pbd2b; 214100 peroxisome biogenesis disorder 1a (zellweger); pbd1a;
NP_002609.1	BGIBMGA004502	0.4	245	2e-43	FBpp0086874	202370 peroxisome biogenesis disorder 2b; pbd2b; 214100 peroxisome biogenesis disorder 1a (zellweger); pbd1a;
EAW88673.1	BGIBMGA006608	0.33	624	2e-74	FBpp0070352	202370 peroxisome biogenesis disorder 2b; pbd2b; 214100 peroxisome biogenesis disorder 1a (zellweger); pbd1a;
NP_000457.1	BGIBMGA003775	0.3	135	5e-09		202370 peroxisome biogenesis disorder 2b; pbd2b; 266510 peroxisome biogenesis disorder 3b; pbd3b; 214100 peroxisome biogenesis disorder 1a (zellweger); pbd1a;
NP_000457.1	BGIBMGA003776	0.4	407	2e-63	FBpp0075519	202370 peroxisome biogenesis disorder 2b; pbd2b; 266510 peroxisome biogenesis disorder 3b; pbd3b; 214100 peroxisome biogenesis disorder 1a (zellweger); pbd1a;
NP_009034.2	BGIBMGA006011	0.86	365	0	FBpp0309828	203450 alexander disease; 256000 leigh syndrome; ls; 252010 mitochondrial complex i deficiency;
NP_009034.2	BGIBMGA006013	0.84	447	0	FBpp0309828	203450 alexander disease; 256000 leigh syndrome; ls; 252010 mitochondrial complex i deficiency;
CAA99340.1	BGIBMGA007324	0.69	439	0	FBpp0079790	203500 alkaptonuria;
NP_002684.1	BGIBMGA009359	0.4	1124	0	FBpp0080148	203700 mitochondrial dna depletion syndrome 4a (alpers type); mtdps4a; 613662 mitochondrial dna depletion syndrome 4b (mngie type); mtdps4b; 607459 sensory ataxic neuropathy, dysarthria, and ophthalmoparesis; sando; 157640 progressive external ophthalmoplegia with mitochondrial dna deletions, autosomal dominant, 1; peoa1; 258450 progressive external ophthalmoplegia with mitochondrial dna deletion…
NP_003097.1	BGIBMGA003077	0.81	54	6e-19	FBpp0303211	206900 microphthalmia, syndromic 3; mcops3;
NP_003097.1	BGIBMGA003078	0.73	81	6e-30	FBpp0303149	206900 microphthalmia, syndromic 3; mcops3;
NP_003097.1	BGIBMGA003079	0.67	97	5e-30	FBpp0305250	206900 microphthalmia, syndromic 3; mcops3;
NP_003097.1	BGIBMGA003080	0.77	43	5e-14	FBpp0303149	206900 microphthalmia, syndromic 3; mcops3;
NP_003097.1	BGIBMGA003081	0.8	53	2e-19	FBpp0303149	206900 microphthalmia, syndromic 3; mcops3;
NP_003097.1	BGIBMGA006156	0.45	151	2e-23	FBpp0303243	206900 microphthalmia, syndromic 3; mcops3;
NP_071420.1	BGIBMGA005119	0.38	71	2e-08	FBpp0084572	206920 microphthalmia with limb anomalies;
NP_000036.2	BGIBMGA007716	0.4	304	1e-63	FBpp0070083	207800 argininemia;
NP_001020114.1	BGIBMGA006876	0.48	398	3e-93	FBpp0309230	207900 argininosuccinic aciduria;
NP_061138.3	BGIBMGA007200	0.28	263	5e-25	FBpp0084210	208085 arthrogryposis, renal dysfunction, and cholestasis 1; arcs1;
NP_061138.3	BGIBMGA008046	0.32	424	1e-55	FBpp0303585	208085 arthrogryposis, renal dysfunction, and cholestasis 1; arcs1;
AAH16445.1	BGIBMGA012868	0.31	109	2e-08	FBpp0303585	208085 arthrogryposis, renal dysfunction, and cholestasis 1; arcs1;
NP_775931.3	BGIBMGA008817	0.35	168	2e-25		208150 fetal akinesia deformation sequence; fads; 254300 myasthenia, limb-girdle, familial;
NP_775931.3	BGIBMGA009089	0.33	127	6e-15	FBpp0078120	208150 fetal akinesia deformation sequence; fads; 254300 myasthenia, limb-girdle, familial;
CAA83954.1	BGIBMGA011177	0.3	379	2e-33	FBpp0088149	208150 fetal akinesia deformation sequence; fads; 608931 myasthenic syndrome, congenital, associated with acetylcholine receptor deficiency;
CAA39288.1	BGIBMGA000866	0.52	249	8e-60	FBpp0308484	208400 aspartylglucosaminuria; agu;
CAA39288.1	BGIBMGA007025	0.29	305	6e-28	FBpp0308748	208400 aspartylglucosaminuria; agu;
Q2VJ45	BGIBMGA003659	0.35	352	3e-47	FBpp0080722	209880 central hypoventilation syndrome, congenital; cchs; 155240 thyroid carcinoma, familial medullary; mtc; 171400 multiple endocrine neoplasia, type iia; men2a; 162300 multiple endocrine neoplasia, type iib; men2b; 171300 pheochromocytoma; 191830 renal adysplasia; 142623 hirschsprung disease, susceptibility to, 1; hscr1;
NP_066124.1	BGIBMGA003802	0.32	336	2e-34	FBpp0073249	209880 central hypoventilation syndrome, congenital; cchs; 155240 thyroid carcinoma, familial medullary; mtc; 171400 multiple endocrine neoplasia, type iia; men2a; 162300 multiple endocrine neoplasia, type iib; men2b; 171300 pheochromocytoma; 191830 renal adysplasia; 142623 hirschsprung disease, susceptibility to, 1; hscr1;
NP_066124.1	BGIBMGA003976	0.44	296	4e-69	FBpp0084248	209880 central hypoventilation syndrome, congenital; cchs; 155240 thyroid carcinoma, familial medullary; mtc; 171400 multiple endocrine neoplasia, type iia; men2a; 162300 multiple endocrine neoplasia, type iib; men2b; 171300 pheochromocytoma; 191830 renal adysplasia; 142623 hirschsprung disease, susceptibility to, 1; hscr1;
NP_078925.3	BGIBMGA002903	0.34	221	4e-32	FBpp0076621	209900 bardet-biedl syndrome; bbs;
NP_078925.3	BGIBMGA002904	0.39	196	5e-23	FBpp0076621	209900 bardet-biedl syndrome; bbs;
BAF82293.1	BGIBMGA002764	0.42	481	9e-94		209900 bardet-biedl syndrome; bbs;
NP_114091.3	BGIBMGA002765	0.37	68	5e-08		209900 bardet-biedl syndrome; bbs;
BAG61027.1	BGIBMGA006705	0.22	333	1e-07	FBpp0074918	209900 bardet-biedl syndrome; bbs;
ABM85635.1	BGIBMGA011069	0.22	344	2e-09	FBpp0072562	209900 bardet-biedl syndrome; bbs;
NP_689597.1	BGIBMGA008712	0.5	336	1e-92	FBpp0078512	209900 bardet-biedl syndrome; bbs;
ABM87809.1	BGIBMGA000949	0.26	208	6e-15		209900 bardet-biedl syndrome; bbs;
NP_940820.1	BGIBMGA006911	0.3	400	3e-45	FBpp0289682	209900 bardet-biedl syndrome; bbs;
BAD97246.1	BGIBMGA007758	0.38	136	2e-21	FBpp0303226	209920 bare lymphocyte syndrome, type ii;
NP_003712.1	BGIBMGA008868	0.35	177	1e-13	FBpp0079487	209920 bare lymphocyte syndrome, type ii;
NP_064551.3	BGIBMGA007497	0.55	653	0	FBpp0300203	210200 3-methylcrotonyl-coa carboxylase 1 deficiency;
NP_001175.2	BGIBMGA007036	0.35	1490	0	FBpp0074047	210600 seckel syndrome 1; sckl1;
NP_001175.2	BGIBMGA008924	0.25	835	3e-62	FBpp0080003	210600 seckel syndrome 1; sckl1;
NP_001175.2	BGIBMGA008952	0.25	952	4e-70	FBpp0307598	210600 seckel syndrome 1; sckl1;
NP_001175.2	BGIBMGA011978	0.33	269	3e-33	FBpp0309979	210600 seckel syndrome 1; sckl1;
BAA23698.3	BGIBMGA009083	0.25	263	2e-09	FBpp0307614	210720 microcephalic osteodysplastic primordial dwarfism, type ii; mopd2;
NP_006022.3	BGIBMGA010953	0.22	232	1e-06	FBpp0297121	210720 microcephalic osteodysplastic primordial dwarfism, type ii; mopd2;
AAI43281.1	BGIBMGA005666	0.36	564	4e-92	FBpp0081910	210900 bloom syndrome; blm;
NP_000048.1	BGIBMGA009286	0.21	330	1e-08	FBpp0087645	210900 bloom syndrome; blm;
BAG36927.1	BGIBMGA010637	0.37	430	4e-68	FBpp0075458	210900 bloom syndrome; blm;
BAG36927.1	BGIBMGA010673	0.24	333	3e-10	FBpp0079566	210900 bloom syndrome; blm;
BAG36927.1	BGIBMGA011746	0.23	334	3e-10	FBpp0291159	210900 bloom syndrome; blm;
BAG36927.1	BGIBMGA011754	0.25	332	2e-12	FBpp0310551	210900 bloom syndrome; blm;
BAG36927.1	BGIBMGA012013	0.24	357	6e-09	FBpp0305296	210900 bloom syndrome; blm;
NP_000048.1	BGIBMGA012404	0.48	432	2e-117	FBpp0081910	210900 bloom syndrome; blm;
NP_000327.2	BGIBMGA012849	0.26	171	1e-08	FBpp0074109	211400 bronchiectasis with or without elevated sweat chloride 1; besc1; 177200 liddle syndrome; 264350 pseudohypoaldosteronism, type i, autosomal recessive; pha1b;
NP_000294.1	BGIBMGA005687	0.54	237	1e-73	FBpp0075693	212065 congenital disorder of glycosylation, type ia; cdg1a;
BAG52082.1	BGIBMGA001608	0.4	324	8e-85	FBpp0306759	212066 congenital disorder of glycosylation, type iia; cdg2a;
NP_003051.1	BGIBMGA001306	0.28	330	3e-29	FBpp0309574	212140 carnitine deficiency, systemic primary; cdsp;
NP_003051.1	BGIBMGA001498	0.26	152	4e-11	FBpp0309234	212140 carnitine deficiency, systemic primary; cdsp;
NP_003051.1	BGIBMGA001599	0.32	428	3e-54	FBpp0078128	212140 carnitine deficiency, systemic primary; cdsp;
ABM86744.1	BGIBMGA002525	0.25	521	3e-39	FBpp0288885	212140 carnitine deficiency, systemic primary; cdsp;
NP_003051.1	BGIBMGA002970	0.3	521	6e-70	FBpp0307149	212140 carnitine deficiency, systemic primary; cdsp;
ABM86744.1	BGIBMGA003437	0.25	517	6e-47	FBpp0288885	212140 carnitine deficiency, systemic primary; cdsp;
NP_003051.1	BGIBMGA005437	0.25	171	5e-06	FBpp0088552	212140 carnitine deficiency, systemic primary; cdsp;
NP_003051.1	BGIBMGA007999	0.29	97	2e-06	FBpp0309574	212140 carnitine deficiency, systemic primary; cdsp;
NP_003051.1	BGIBMGA008659	0.34	186	3e-27	FBpp0309574	212140 carnitine deficiency, systemic primary; cdsp;
NP_003051.1	BGIBMGA009055	0.26	327	3e-26	FBpp0078128	212140 carnitine deficiency, systemic primary; cdsp;
NP_003051.1	BGIBMGA009185	0.27	465	7e-33	FBpp0078128	212140 carnitine deficiency, systemic primary; cdsp;
NP_003051.1	BGIBMGA009193	0.29	395	5e-30	FBpp0078128	212140 carnitine deficiency, systemic primary; cdsp;
ABM86744.1	BGIBMGA009197	0.25	519	2e-30	FBpp0078128	212140 carnitine deficiency, systemic primary; cdsp;
NP_003051.1	BGIBMGA009199	0.32	335	8e-42	FBpp0078124	212140 carnitine deficiency, systemic primary; cdsp;
NP_003051.1	BGIBMGA009200	0.25	353	9e-39	FBpp0078128	212140 carnitine deficiency, systemic primary; cdsp;
NP_003051.1	BGIBMGA011012	0.3	490	8e-56	FBpp0082730	212140 carnitine deficiency, systemic primary; cdsp;
NP_003051.1	BGIBMGA011016	0.32	411	6e-64	FBpp0309574	212140 carnitine deficiency, systemic primary; cdsp;
ABM86744.1	BGIBMGA011017	0.3	416	9e-57	FBpp0309574	212140 carnitine deficiency, systemic primary; cdsp;
NP_003051.1	BGIBMGA011021	0.28	360	1e-32	FBpp0309574	212140 carnitine deficiency, systemic primary; cdsp;
ABM86744.1	BGIBMGA011090	0.32	425	3e-55	FBpp0309574	212140 carnitine deficiency, systemic primary; cdsp;
NP_003051.1	BGIBMGA011093	0.31	489	4e-45	FBpp0112387	212140 carnitine deficiency, systemic primary; cdsp;
ABM86744.1	BGIBMGA011225	0.29	428	8e-46	FBpp0288885	212140 carnitine deficiency, systemic primary; cdsp;
ABM86744.1	BGIBMGA011226	0.27	521	1e-44	FBpp0288885	212140 carnitine deficiency, systemic primary; cdsp;
NP_003051.1	BGIBMGA011879	0.33	520	7e-68	FBpp0086928	212140 carnitine deficiency, systemic primary; cdsp;
NP_003051.1	BGIBMGA012587	0.27	389	8e-34	FBpp0078124	212140 carnitine deficiency, systemic primary; cdsp;
NP_003051.1	BGIBMGA013435	0.21	332	1e-06	FBpp0111892	212140 carnitine deficiency, systemic primary; cdsp;
NP_003051.1	BGIBMGA013585	0.27	152	2e-09	FBpp0111892	212140 carnitine deficiency, systemic primary; cdsp;
NP_003051.1	BGIBMGA013642	0.22	383	1e-07	FBpp0290244	212140 carnitine deficiency, systemic primary; cdsp;
ABM86744.1	BGIBMGA013688	0.35	194	7e-28	FBpp0086928	212140 carnitine deficiency, systemic primary; cdsp;
NP_003051.1	BGIBMGA013710	0.29	386	4e-45	FBpp0078124	212140 carnitine deficiency, systemic primary; cdsp;
NP_003051.1	BGIBMGA013711	0.32	308	2e-39	FBpp0078128	212140 carnitine deficiency, systemic primary; cdsp;
BAG51330.1	BGIBMGA010665	0.24	519	1e-34	FBpp0079886	212720 martsolf syndrome;
NP_063945.2	BGIBMGA005398	0.43	73	1e-09	FBpp0297529	213300 joubert syndrome 1; jbts1; 610156 mental retardation, truncal obesity, retinal dystrophy, and micropenis;
NP_063945.2	BGIBMGA007291	0.42	289	6e-56	FBpp0305548	213300 joubert syndrome 1; jbts1; 610156 mental retardation, truncal obesity, retinal dystrophy, and micropenis;
NP_063945.2	BGIBMGA007292	0.45	73	2e-11	FBpp0305548	213300 joubert syndrome 1; jbts1; 610156 mental retardation, truncal obesity, retinal dystrophy, and micropenis;
NP_001180573.1	BGIBMGA011144	0.35	207	2e-27	FBpp0309544	214100 peroxisome biogenesis disorder 1a (zellweger); pbd1a;
NP_004556.1	BGIBMGA014129	0.26	218	8e-12	FBpp0077909	214100 peroxisome biogenesis disorder 1a (zellweger); pbd1a;
NP_003621.1	BGIBMGA010225	0.32	366	2e-49	FBpp0304214	214100 peroxisome biogenesis disorder 1a (zellweger); pbd1a;
NP_036563.1	BGIBMGA003697	0.3	508	3e-58	FBpp0291371	214800 charge syndrome;
NP_036563.1	BGIBMGA004093	0.3	465	1e-57	FBpp0292882	214800 charge syndrome;
NP_036563.1	BGIBMGA008511	0.37	231	3e-35	FBpp0311494	214800 charge syndrome;
NP_036563.1	BGIBMGA008512	0.26	164	1e-05	FBpp0311494	214800 charge syndrome;
NP_036563.1	BGIBMGA010124	0.33	434	5e-50	FBpp0289568	214800 charge syndrome;
NP_055139.4	BGIBMGA003156	0.49	367	2e-85	FBpp0307147	214950 bile acid synthesis defect, congenital, 4; cbas4;
NP_000118.2	BGIBMGA003727	0.46	744	0	FBpp0305367	215300 chondrosarcoma; 133700 exostoses, multiple, type i;
NP_000073.1	BGIBMGA010495	0.22	222	8e-07	FBpp0087402	216400 cockayne syndrome a; csa;
NP_858047.2	BGIBMGA003852	0.47	188	5e-43	FBpp0290049	216550 cohen syndrome; coh1;
NP_542378.1	BGIBMGA013132	0.72	197	3e-81	FBpp0311870	217095 conotruncal heart malformations; cthm; 188400 digeorge syndrome; dgs; 192430 velocardiofacial syndrome;
NP_789765.1	BGIBMGA003980	0.57	120	1e-35	FBpp0289803	218040 costello syndrome; 109800 bladder cancer; 188470 thyroid carcinoma, follicular; ftc;
NP_005334.1	BGIBMGA009918	0.55	166	2e-49	FBpp0070559	218040 costello syndrome; 109800 bladder cancer; 188470 thyroid carcinoma, follicular; ftc;
NP_789765.1	BGIBMGA012832	0.27	109	6e-06	FBpp0306785	218040 costello syndrome; 109800 bladder cancer; 188470 thyroid carcinoma, follicular; ftc;
NP_004251.3	BGIBMGA008914	0.21	349	2e-11	FBpp0073828	218600 baller-gerold syndrome; bgs; 266280 rapadilino syndrome; 268400 rothmund-thomson syndrome; rts;
NP_004251.3	BGIBMGA009903	0.28	125	7e-06	FBpp0076003	218600 baller-gerold syndrome; bgs; 266280 rapadilino syndrome; 268400 rothmund-thomson syndrome; rts;
NP_004251.3	BGIBMGA010259	0.23	369	4e-10	FBpp0112117	218600 baller-gerold syndrome; bgs; 266280 rapadilino syndrome; 268400 rothmund-thomson syndrome; rts;
EAW82071.1	BGIBMGA011784	0.35	537	3e-95	FBpp0076452	218600 baller-gerold syndrome; bgs; 266280 rapadilino syndrome; 268400 rothmund-thomson syndrome; rts;
ADZ16096.1	BGIBMGA000222	0.46	345	1e-79	FBpp0310702	219900 cystinosis, late-onset juvenile or adolescent nephropathic type; 219800 cystinosis, nephropathic; ctns; 219750 cystinosis, adult nonnephropathic;
NP_001854.1	BGIBMGA004650	0.4	77	3e-16	FBpp0300889	220110 mitochondrial complex iv deficiency;
NP_573566.2	BGIBMGA003578	0.22	828	2e-60	FBpp0070221	220111 leigh syndrome, french canadian type; lsfc;
NP_573566.2	BGIBMGA010538	0.36	422	8e-73	FBpp0080637	220111 leigh syndrome, french canadian type; lsfc;
NP_660305.2	BGIBMGA000827	0.43	424	2e-80	FBpp0307439	220120 d-glyceric aciduria;
NP_004516.2	BGIBMGA003646	0.39	98	5e-16	FBpp0307459	222448 donnai-barrow syndrome;
NP_004516.2	BGIBMGA006213	0.29	115	4e-07	FBpp0305995	222448 donnai-barrow syndrome;
NP_004516.2	BGIBMGA006214	0.25	209	4e-09	FBpp0291540	222448 donnai-barrow syndrome;
AAB41649.1	BGIBMGA011982	0.38	4344	0	FBpp0310028	222448 donnai-barrow syndrome;
NP_004516.2	BGIBMGA012239	0.3	122	1e-13	FBpp0309662	222448 donnai-barrow syndrome;
NP_004516.2	BGIBMGA014163	0.32	294	9e-37	FBpp0073715	222448 donnai-barrow syndrome;
NP_003973.3	BGIBMGA002988	0.53	166	5e-34	FBpp0293626	222700 lysinuric protein intolerance; lpi;
NP_003973.3	BGIBMGA003178	0.48	453	4e-108	FBpp0113021	222700 lysinuric protein intolerance; lpi;
NP_003973.3	BGIBMGA003856	0.39	467	8e-87	FBpp0311411	222700 lysinuric protein intolerance; lpi;
NP_003973.3	BGIBMGA004738	0.42	163	3e-28	FBpp0310023	222700 lysinuric protein intolerance; lpi;
NP_003973.3	BGIBMGA010801	0.49	429	2e-97	FBpp0306617	222700 lysinuric protein intolerance; lpi;
NP_003973.3	BGIBMGA014238	0.34	94	3e-06	FBpp0271785	222700 lysinuric protein intolerance; lpi;
NP_003973.3	BGIBMGA014240	0.25	234	3e-10	FBpp0078208	222700 lysinuric protein intolerance; lpi;
NP_001376.1	BGIBMGA005717	0.59	395	8e-131	FBpp0112945	222748 dihydropyrimidinase deficiency;
NP_001376.1	BGIBMGA006812	0.24	441	7e-09	FBpp0309961	222748 dihydropyrimidinase deficiency;
NP_055051.1	BGIBMGA005057	0.44	243	1e-54	FBpp0303401	222765 rhizomelic chondrodysplasia punctata, type 2; rcdp2;
NP_055051.1	BGIBMGA010829	0.32	231	1e-27	FBpp0307019	222765 rhizomelic chondrodysplasia punctata, type 2; rcdp2;
EAW62936.1	BGIBMGA009660	0.37	655	1e-106	FBpp0087755	223800 dyggve-melchior-clausen disease; dmc; 607326 smith-mccort dysplasia 1; smc1;
AAC64258.1	BGIBMGA001538	0.31	493	2e-61	FBpp0307425	223900 neuropathy, hereditary sensory and autonomic, type iii; hsan3;
NP_003374.3	BGIBMGA002661	0.45	717	0	FBpp0290685	224050 cerebellar ataxia, mental retardation, and dysequilibrium syndrome 1; camrq1;
NP_003374.3	BGIBMGA012215	0.35	189	4e-29	FBpp0082798	224050 cerebellar ataxia, mental retardation, and dysequilibrium syndrome 1; camrq1;
NP_612486.2	BGIBMGA011154	0.29	192	5e-17	FBpp0072673	224120 anemia, dyserythropoietic congenital, type i; cdan1;
NP_005520.4	BGIBMGA003750	0.3	114	2e-09	FBpp0305929	224410 dyssegmental dysplasia, silverman-handmaker type; ddsh; 255800 schwartz-jampel syndrome, type 1; sjs1;
EAW94997.1	BGIBMGA012240	0.27	2535	0	FBpp0309657	224410 dyssegmental dysplasia, silverman-handmaker type; ddsh; 255800 schwartz-jampel syndrome, type 1; sjs1;
CAA44373.1	BGIBMGA013733	0.29	215	2e-12	FBpp0112310	224410 dyssegmental dysplasia, silverman-handmaker type; ddsh; 255800 schwartz-jampel syndrome, type 1; sjs1;
NP_005520.4	BGIBMGA013755	0.23	178	7e-06	FBpp0311190	224410 dyssegmental dysplasia, silverman-handmaker type; ddsh; 255800 schwartz-jampel syndrome, type 1; sjs1;
NP_005520.4	BGIBMGA013906	0.36	169	2e-13	FBpp0309033	224410 dyssegmental dysplasia, silverman-handmaker type; ddsh; 255800 schwartz-jampel syndrome, type 1; sjs1;
NP_005520.4	BGIBMGA013907	0.28	422	1e-33	FBpp0309033	224410 dyssegmental dysplasia, silverman-handmaker type; ddsh; 255800 schwartz-jampel syndrome, type 1; sjs1;
NP_004144.2	BGIBMGA002754	0.47	358	7e-83	FBpp0088033	224690 meier-gorlin syndrome 1; mgors1;
NP_067610.1	BGIBMGA002474	0.34	248	8e-25	FBpp0290306	225410 ehlers-danlos syndrome, type vii, autosomal recessive;
NP_055059.2	BGIBMGA002475	0.24	243	1e-13	FBpp0290305	225410 ehlers-danlos syndrome, type vii, autosomal recessive;
NP_060261.2	BGIBMGA012097	0.48	265	2e-59	FBpp0292379	225790 proliferative vasculopathy and hydranencephaly-hydrocephaly syndrome; pvhh;
NP_060261.2	BGIBMGA013528	0.54	206	4e-54	FBpp0292379	225790 proliferative vasculopathy and hydranencephaly-hydrocephaly syndrome; pvhh;
NP_002763.2	BGIBMGA003679	0.34	376	1e-53	FBpp0307926	226200 enterokinase deficiency;
NP_002763.2	BGIBMGA004577	0.29	186	5e-16	FBpp0292156	226200 enterokinase deficiency;
NP_002763.2	BGIBMGA008668	0.39	232	1e-38	FBpp0304903	226200 enterokinase deficiency;
NP_002763.2	BGIBMGA008673	0.36	244	1e-39	FBpp0290431	226200 enterokinase deficiency;
NP_002763.2	BGIBMGA010590	0.4	231	5e-39	FBpp0087255	226200 enterokinase deficiency;
EAX10016.1	BGIBMGA012217	0.28	252	4e-19	FBpp0082363	226200 enterokinase deficiency;
NP_002763.2	BGIBMGA014089	0.35	232	2e-41	FBpp0076693	226200 enterokinase deficiency;
NP_937762.1	BGIBMGA002018	0.33	1499	0	FBpp0076722	226650 epidermolysis bullosa, junctional, non-herlitz type; 226700 epidermolysis bullosa, junctional, herlitz type; 245660 laryngoonychocutaneous syndrome; locs;
NP_004827.4	BGIBMGA004872	0.34	203	1e-23	FBpp0306618	226980 epiphyseal dysplasia, multiple, with early-onset diabetes mellitus;
NP_004827.4	BGIBMGA006037	0.29	190	1e-21	FBpp0306619	226980 epiphyseal dysplasia, multiple, with early-onset diabetes mellitus;
NP_004827.4	BGIBMGA008626	0.39	295	2e-35	FBpp0303060	226980 epiphyseal dysplasia, multiple, with early-onset diabetes mellitus;
NP_004827.4	BGIBMGA011283	0.27	212	2e-06	FBpp0084711	226980 epiphyseal dysplasia, multiple, with early-onset diabetes mellitus;
NP_149075.2	BGIBMGA007799	0.38	137	2e-21	FBpp0083399	227646 fanconi anemia, complementation group d2; fancd2;
NP_000331.1	BGIBMGA000224	0.25	325	3e-20	FBpp0300975	227810 fanconi-bickel syndrome; fbs;
NP_000331.1	BGIBMGA001780	0.22	379	1e-10	FBpp0072148	227810 fanconi-bickel syndrome; fbs;
BAF83535.1	BGIBMGA002430	0.27	163	2e-07	FBpp0309234	227810 fanconi-bickel syndrome; fbs;
NP_000331.1	BGIBMGA002634	0.3	379	8e-30	FBpp0297096	227810 fanconi-bickel syndrome; fbs;
BAF83535.1	BGIBMGA002635	0.26	384	1e-26	FBpp0297096	227810 fanconi-bickel syndrome; fbs;
NP_000331.1	BGIBMGA003739	0.31	443	1e-43	FBpp0087178	227810 fanconi-bickel syndrome; fbs;
BAF83535.1	BGIBMGA003740	0.31	409	6e-44	FBpp0087179	227810 fanconi-bickel syndrome; fbs;
BAF83535.1	BGIBMGA004436	0.26	431	4e-22	FBpp0077272	227810 fanconi-bickel syndrome; fbs;
NP_000331.1	BGIBMGA004524	0.24	225	6e-06	FBpp0087180	227810 fanconi-bickel syndrome; fbs;
NP_000331.1	BGIBMGA004525	0.24	285	5e-08	FBpp0087180	227810 fanconi-bickel syndrome; fbs;
NP_000331.1	BGIBMGA004562	0.29	439	2e-31	FBpp0087178	227810 fanconi-bickel syndrome; fbs;
NP_000331.1	BGIBMGA004563	0.26	439	3e-24	FBpp0087180	227810 fanconi-bickel syndrome; fbs;
NP_000331.1	BGIBMGA004564	0.26	398	1e-29	FBpp0087180	227810 fanconi-bickel syndrome; fbs;
NP_000331.1	BGIBMGA004615	0.23	404	2e-17	FBpp0072148	227810 fanconi-bickel syndrome; fbs;
BAH12783.1	BGIBMGA004629	0.24	402	3e-12	FBpp0087179	227810 fanconi-bickel syndrome; fbs;
NP_000331.1	BGIBMGA005603	0.25	218	2e-13	FBpp0297096	227810 fanconi-bickel syndrome; fbs;
BAF83535.1	BGIBMGA005604	0.3	365	8e-24	FBpp0075675	227810 fanconi-bickel syndrome; fbs;
BAF83535.1	BGIBMGA005605	0.25	403	2e-18	FBpp0075675	227810 fanconi-bickel syndrome; fbs;
NP_000331.1	BGIBMGA008230	0.26	224	2e-12	FBpp0077272	227810 fanconi-bickel syndrome; fbs;
NP_000331.1	BGIBMGA008231	0.27	187	5e-09	FBpp0077272	227810 fanconi-bickel syndrome; fbs;
BAF83535.1	BGIBMGA009376	0.24	408	1e-15	FBpp0087180	227810 fanconi-bickel syndrome; fbs;
BAF83535.1	BGIBMGA010161	0.24	384	9e-18	FBpp0072148	227810 fanconi-bickel syndrome; fbs;
BAF83535.1	BGIBMGA010319	0.29	369	4e-23	FBpp0087180	227810 fanconi-bickel syndrome; fbs;
NP_000331.1	BGIBMGA010740	0.35	277	3e-51	FBpp0112109	227810 fanconi-bickel syndrome; fbs;
BAF83535.1	BGIBMGA010741	0.32	394	7e-32	FBpp0297096	227810 fanconi-bickel syndrome; fbs;
BAF83535.1	BGIBMGA010742	0.34	394	9e-35	FBpp0297096	227810 fanconi-bickel syndrome; fbs;
BAF83535.1	BGIBMGA010743	0.32	394	5e-37	FBpp0297096	227810 fanconi-bickel syndrome; fbs;
BAF83535.1	BGIBMGA012082	0.3	381	1e-27	FBpp0075675	227810 fanconi-bickel syndrome; fbs;
BAF83535.1	BGIBMGA013654	0.25	392	9e-23	FBpp0112109	227810 fanconi-bickel syndrome; fbs;
NP_000331.1	BGIBMGA013656	0.26	385	5e-19	FBpp0075675	227810 fanconi-bickel syndrome; fbs;
BAF83535.1	BGIBMGA013729	0.28	385	6e-26	FBpp0077272	227810 fanconi-bickel syndrome; fbs;
BAF83535.1	BGIBMGA013926	0.25	374	9e-14	FBpp0087180	227810 fanconi-bickel syndrome; fbs;
BAF83535.1	BGIBMGA013928	0.25	336	2e-24	FBpp0087180	227810 fanconi-bickel syndrome; fbs;
NP_000331.1	BGIBMGA014054	0.27	396	9e-23	FBpp0088616	227810 fanconi-bickel syndrome; fbs;
NP_004616.2	BGIBMGA006145	0.31	122	1e-19	FBpp0306845	228930 fibular aplasia or hypoplasia, femoral bowing and poly-, syn-, and oligodactyly; 276820 ulna and fibula, absence of, with severe limb deficiency;
NP_004616.2	BGIBMGA006148	0.45	90	2e-20	FBpp0292305	228930 fibular aplasia or hypoplasia, femoral bowing and poly-, syn-, and oligodactyly; 276820 ulna and fibula, absence of, with severe limb deficiency;
NP_004616.2	BGIBMGA013981	0.48	272	4e-72	FBpp0308474	228930 fibular aplasia or hypoplasia, femoral bowing and poly-, syn-, and oligodactyly; 276820 ulna and fibula, absence of, with severe limb deficiency;
NP_542400.2	BGIBMGA000671	0.27	163	3e-07	FBpp0289881	229050 folate malabsorption, hereditary;
NP_542400.2	BGIBMGA007020	0.26	198	4e-06	FBpp0083412	229050 folate malabsorption, hereditary;
NP_542400.2	BGIBMGA010933	0.22	207	1e-06	FBpp0308816	229050 folate malabsorption, hereditary;
NP_001229295.1	BGIBMGA010934	0.21	337	5e-08	FBpp0308816	229050 folate malabsorption, hereditary;
NP_542400.2	BGIBMGA010937	0.25	152	5e-06	FBpp0308816	229050 folate malabsorption, hereditary;
NP_542400.2	BGIBMGA010938	0.25	160	7e-06	FBpp0308816	229050 folate malabsorption, hereditary;
NP_542400.2	BGIBMGA014434	0.22	343	3e-10	FBpp0087664	229050 folate malabsorption, hereditary;
NP_000138.2	BGIBMGA006905	0.52	428	7e-138	FBpp0100046	230000 fucosidosis;
AAB86498.1	BGIBMGA001383	0.58	344	1e-109	FBpp0297771	230350 galactose epimerase deficiency;
AAB86498.1	BGIBMGA001865	0.56	218	5e-73	FBpp0297771	230350 galactose epimerase deficiency;
AAB86498.1	BGIBMGA007768	0.27	247	7e-11	FBpp0076413	230350 galactose epimerase deficiency;
AAC83409.1	BGIBMGA001613	0.6	340	7e-102	FBpp0305544	230400 galactosemia;
BAD96811.1	BGIBMGA006815	0.42	601	8e-124	FBpp0081961	230500 gm1-gangliosidosis, type i; 230600 gm1-gangliosidosis, type ii; 230650 gm1-gangliosidosis, type iii; 253010 mucopolysaccharidosis type ivb;
NP_689494.2	BGIBMGA012109	0.51	102	8e-15	FBpp0074991	231070 geroderma osteodysplasticum; go;
Q16836.3	BGIBMGA000419	0.26	212	8e-13	FBpp0311907	231530 3-hydroxyacyl-coa dehydrogenase deficiency; 609975 hyperinsulinemic hypoglycemia, familial, 4; hhf4;
NP_005318.3	BGIBMGA007360	0.53	311	2e-89	FBpp0079454	231530 3-hydroxyacyl-coa dehydrogenase deficiency; 609975 hyperinsulinemic hypoglycemia, familial, 4; hhf4;
NP_005318.3	BGIBMGA007361	0.61	77	6e-20		231530 3-hydroxyacyl-coa dehydrogenase deficiency; 609975 hyperinsulinemic hypoglycemia, familial, 4; hhf4;
NP_005318.3	BGIBMGA007408	0.58	139	7e-39	FBpp0079454	231530 3-hydroxyacyl-coa dehydrogenase deficiency; 609975 hyperinsulinemic hypoglycemia, familial, 4; hhf4;
NP_005318.3	BGIBMGA007409	0.67	150	3e-57	FBpp0079454	231530 3-hydroxyacyl-coa dehydrogenase deficiency; 609975 hyperinsulinemic hypoglycemia, familial, 4; hhf4;
NP_056480.1	BGIBMGA007431	0.33	441	1e-69	FBpp0071254	231550 achalasia-addisonianism-alacrima syndrome; aaas;
AAC52079.1	BGIBMGA005444	0.63	367	2e-138	FBpp0078893	231670 glutaric acidemia i;
NP_001180242.1	BGIBMGA006055	0.51	322	1e-90	FBpp0083357	231690 glutaric aciduria iii;
ADR83154.1	BGIBMGA009712	0.29	178	3e-11	FBpp0111930	232200 glycogen storage disease ia;
NP_001458.1	BGIBMGA011231	0.29	148	2e-09	FBpp0309685	232220 glycogen storage disease ib; 232240 glycogen storage disease ic;
BAD92104.1	BGIBMGA010888	0.38	909	8e-159	FBpp0071526	232400 glycogen storage disease iii;
NP_000149.3	BGIBMGA007451	0.6	647	0	FBpp0086845	232500 glycogen storage disease iv;
NP_005980.1	BGIBMGA001351	0.4	313	2e-57	FBpp0073028	235555 bile acid synthesis defect, congenital, 2; cbas2;
NP_005980.1	BGIBMGA005047	0.39	308	4e-50	FBpp0081312	235555 bile acid synthesis defect, congenital, 2; cbas2;
NP_005980.1	BGIBMGA005155	0.36	165	2e-20	FBpp0081312	235555 bile acid synthesis defect, congenital, 2; cbas2;
NP_005980.1	BGIBMGA009800	0.35	311	1e-47	FBpp0073028	235555 bile acid synthesis defect, congenital, 2; cbas2;
NP_005980.1	BGIBMGA009801	0.42	173	2e-32	FBpp0089012	235555 bile acid synthesis defect, congenital, 2; cbas2;
CAQ55952.1	BGIBMGA013253	0.5	70	2e-11	FBpp0085467	235555 bile acid synthesis defect, congenital, 2; cbas2;
NP_055610.1	BGIBMGA002551	0.65	102	3e-32	FBpp0085063	235730 mowat-wilson syndrome; mows;
NP_001171480.1	BGIBMGA000065	0.52	317	1e-82	FBpp0309380	236200 homocystinuria due to cystathionine beta-synthase deficiency;
NP_001171480.1	BGIBMGA004935	0.44	299	1e-69	FBpp0309380	236200 homocystinuria due to cystathionine beta-synthase deficiency;
NP_001171480.1	BGIBMGA005174	0.64	161	7e-52	FBpp0309380	236200 homocystinuria due to cystathionine beta-synthase deficiency;
NP_001171480.1	BGIBMGA012123	0.35	273	1e-31	FBpp0309380	236200 homocystinuria due to cystathionine beta-synthase deficiency;
NP_076915.2	BGIBMGA011007	0.33	425	1e-56	FBpp0307944	236270 homocystinuria-megaloblastic anemia, cble complementation type; hmae; 601634 neural tube defects, folate-sensitive;
NP_001866.2	BGIBMGA006816	0.5	1432	0	FBpp0309141	237300 carbamoyl phosphate synthetase i deficiency, hyperammonemia due to; 265380 alveolar capillary dysplasia with misalignment of pulmonary veins; acdmpv;
NP_005754.2	BGIBMGA010338	0.51	896	0	FBpp0310050	238700 hyperlysinemia; 268700 saccharopinuria;
NP_055067.1	BGIBMGA001233	0.48	292	8e-63	FBpp0302592	238970 hyperornithinemia-hyperammonemia-homocitrullinuria syndrome;
NP_003184.1	BGIBMGA000149	0.34	518	5e-59	FBpp0307274	241410 hypoparathyroidism-retardation-dysmorphism syndrome; hrd; 244460 kenny-caffey syndrome, type 1; kcs1;
BAH12714.1	BGIBMGA001363	0.44	63	7e-09	FBpp0077308	241410 hypoparathyroidism-retardation-dysmorphism syndrome; hrd; 244460 kenny-caffey syndrome, type 1; kcs1;
NP_003184.1	BGIBMGA002782	0.24	229	2e-06	FBpp0082877	241410 hypoparathyroidism-retardation-dysmorphism syndrome; hrd; 244460 kenny-caffey syndrome, type 1; kcs1;
NP_003184.1	BGIBMGA008544	0.25	186	6e-12	FBpp0304278	241410 hypoparathyroidism-retardation-dysmorphism syndrome; hrd; 244460 kenny-caffey syndrome, type 1; kcs1;
NP_054859.2	BGIBMGA009112	0.39	529	3e-84	FBpp0078631	242900 immunoosseous dysplasia, schimke type;
NP_005594.1	BGIBMGA001042	0.33	357	1e-47	FBpp0290287	243300 cholestasis, benign recurrent intrahepatic, 1; bric1; 211600 cholestasis, progressive familial intrahepatic, 1; pfic1;
NP_005594.1	BGIBMGA001074	0.37	1097	0	FBpp0289043	243300 cholestasis, benign recurrent intrahepatic, 1; bric1; 211600 cholestasis, progressive familial intrahepatic, 1; pfic1;
NP_005594.1	BGIBMGA001552	0.54	609	7e-171	FBpp0308705	243300 cholestasis, benign recurrent intrahepatic, 1; bric1; 211600 cholestasis, progressive familial intrahepatic, 1; pfic1;
NP_005594.1	BGIBMGA001553	0.43	506	4e-109	FBpp0308706	243300 cholestasis, benign recurrent intrahepatic, 1; bric1; 211600 cholestasis, progressive familial intrahepatic, 1; pfic1;
NP_005594.1	BGIBMGA003317	0.28	622	9e-52	FBpp0311166	243300 cholestasis, benign recurrent intrahepatic, 1; bric1; 211600 cholestasis, progressive familial intrahepatic, 1; pfic1;
NP_005594.1	BGIBMGA005880	0.31	895	7e-120	FBpp0306160	243300 cholestasis, benign recurrent intrahepatic, 1; bric1; 211600 cholestasis, progressive familial intrahepatic, 1; pfic1;
NP_777576.1	BGIBMGA009222	0.35	249	2e-32	FBpp0312009	243800 johanson-blizzard syndrome; jbs;
NP_777576.1	BGIBMGA009223	0.37	458	3e-62	FBpp0312009	243800 johanson-blizzard syndrome; jbs;
NP_003840.2	BGIBMGA010120	0.72	304	3e-112	FBpp0292215	245400 mitochondrial dna depletion syndrome 9 (encephalomyopathic type with methylmalonic aciduria); mtdps9;
NP_003840.2	BGIBMGA012780	0.72	304	3e-112	FBpp0292215	245400 mitochondrial dna depletion syndrome 9 (encephalomyopathic type with methylmalonic aciduria); mtdps9;
NP_036332.2	BGIBMGA008529	0.48	231	1e-55	FBpp0070612	245600 multiple joint dislocations, short stature, craniofacial dysmorphism, and congenital heart defects;
NP_036332.2	BGIBMGA012266	0.43	244	3e-43	FBpp0079439	245600 multiple joint dislocations, short stature, craniofacial dysmorphism, and congenital heart defects;
NP_057187.1	BGIBMGA002504	0.74	196	3e-81	FBpp0089284	246700 chylomicron retention disease; cmrd;
BAF84261.1	BGIBMGA001695	0.31	566	1e-66	FBpp0079621	248500 mannosidosis, alpha b, lysosomal; mansa;
AAC50812.1	BGIBMGA001727	0.4	287	5e-53	FBpp0079621	248500 mannosidosis, alpha b, lysosomal; mansa;
NP_001166969.1	BGIBMGA001728	0.31	400	3e-49	FBpp0079621	248500 mannosidosis, alpha b, lysosomal; mansa;
AAC50812.1	BGIBMGA005142	0.27	784	6e-67	FBpp0306417	248500 mannosidosis, alpha b, lysosomal; mansa;
AAC50812.1	BGIBMGA011378	0.34	596	3e-91	FBpp0079620	248500 mannosidosis, alpha b, lysosomal; mansa;
NP_001166969.1	BGIBMGA012267	0.24	792	4e-55	FBpp0311424	248500 mannosidosis, alpha b, lysosomal; mansa;
NP_001166969.1	BGIBMGA012324	0.27	243	5e-14	FBpp0311424	248500 mannosidosis, alpha b, lysosomal; mansa;
AAC50811.1	BGIBMGA014566	0.58	283	3e-97	FBpp0079621	248500 mannosidosis, alpha b, lysosomal; mansa;
NP_015565.1	BGIBMGA001152	0.58	232	3e-78	FBpp0291346	250800 methemoglobinemia due to deficiency of methemoglobin reductase;
NP_015565.1	BGIBMGA004702	0.28	161	9e-09	FBpp0312183	250800 methemoglobinemia due to deficiency of methemoglobin reductase;
AAA52307.1	BGIBMGA009014	0.29	150	2e-09	FBpp0085713	250800 methemoglobinemia due to deficiency of methemoglobin reductase;
NP_000245.2	BGIBMGA004208	0.25	310	1e-10	FBpp0309710	250940 homocystinuria-megaloblastic anemia, cblg complementation type; hmag; 190685 down syndrome; 601634 neural tube defects, folate-sensitive;
NP_001689.1	BGIBMGA004489	0.29	198	2e-17	FBpp0082063	250950 3-methylglutaconic aciduria, type i; mgca1;
NP_001689.1	BGIBMGA005528	0.52	253	3e-63	FBpp0086993	250950 3-methylglutaconic aciduria, type i; mgca1;
NP_001689.1	BGIBMGA005656	0.39	253	2e-39	FBpp0086769	250950 3-methylglutaconic aciduria, type i; mgca1;
ABM86153.1	BGIBMGA008189	0.29	160	8e-13	FBpp0070006	250950 3-methylglutaconic aciduria, type i; mgca1;
NP_001689.1	BGIBMGA011639	0.28	167	3e-08	FBpp0304781	250950 3-methylglutaconic aciduria, type i; mgca1;
NP_620148.1	BGIBMGA007005	0.46	364	6e-90	FBpp0308466	251450 desbuquois dysplasia; dbqd;
NP_077025.2	BGIBMGA011394	0.56	142	1e-39	FBpp0303475	252010 mitochondrial complex i deficiency;
NP_004541.1	BGIBMGA002989	0.59	412	8e-139	FBpp0305832	252010 mitochondrial complex i deficiency;
NP_066552.2	BGIBMGA003691	0.55	166	2e-48	FBpp0309486	252010 mitochondrial complex i deficiency;
NP_054884.1	BGIBMGA004494	0.37	170	3e-23	FBpp0081683	252010 mitochondrial complex i deficiency;
CAA43412.1	BGIBMGA005568	0.49	715	0	FBpp0071129	252010 mitochondrial complex i deficiency;
NP_079428.2	BGIBMGA006973	0.34	214	4e-34	FBpp0077868	252010 mitochondrial complex i deficiency;
NP_079428.2	BGIBMGA007944	0.5	268	5e-66	FBpp0306285	252010 mitochondrial complex i deficiency;
NP_004997.4	BGIBMGA008957	0.62	720	0	FBpp0071129	252010 mitochondrial complex i deficiency;
NP_004541.1	BGIBMGA011131	0.78	412	0	FBpp0305832	252010 mitochondrial complex i deficiency;
CAG33209.1	BGIBMGA011870	0.61	245	1e-83	FBpp0309486	252010 mitochondrial complex i deficiency;
NP_783313.1	BGIBMGA012632	0.33	129	3e-13	FBpp0071459	252010 mitochondrial complex i deficiency;
NP_079428.2	BGIBMGA014474	0.39	231	9e-42	FBpp0080448	252010 mitochondrial complex i deficiency;
NP_000190.1	BGIBMGA005529	0.56	415	2e-136	FBpp0083138	252900 mucopolysaccharidosis type iiia;
NP_689632.2	BGIBMGA001270	0.39	384	6e-73	FBpp0310139	252930 mucopolysaccharidosis type iiic;
NP_689632.2	BGIBMGA004220	0.4	389	3e-81	FBpp0310139	252930 mucopolysaccharidosis type iiic;
NP_002067.1	BGIBMGA007568	0.44	100	9e-14	FBpp0306755	252940 mucopolysaccharidosis type iiid;
BAD97204.1	BGIBMGA007569	0.44	208	5e-40	FBpp0306755	252940 mucopolysaccharidosis type iiid;
NP_002067.1	BGIBMGA007570	0.42	80	2e-09	FBpp0306755	252940 mucopolysaccharidosis type iiid;
BAF84460.1	BGIBMGA012952	0.46	479	6e-112	FBpp0086833	252940 mucopolysaccharidosis type iiid;
AAA51779.1	BGIBMGA001098	0.43	288	4e-67	FBpp0290455	253200 mucopolysaccharidosis type vi;
AAA51779.1	BGIBMGA012509	0.34	388	7e-55	FBpp0290455	253200 mucopolysaccharidosis type vi;
BAG37417.1	BGIBMGA012510	0.3	314	1e-28	FBpp0290455	253200 mucopolysaccharidosis type vi;
AAA51779.1	BGIBMGA012511	0.38	336	1e-58	FBpp0290455	253200 mucopolysaccharidosis type vi;
AAA51779.1	BGIBMGA012512	0.36	172	3e-23	FBpp0290455	253200 mucopolysaccharidosis type vi;
NP_000172.2	BGIBMGA005500	0.43	498	1e-120	FBpp0309401	253220 mucopolysaccharidosis type vii;
NP_056109.1	BGIBMGA002780	0.66	445	8e-173		253250 mulibrey nanism;
NP_000070.1	BGIBMGA007809	0.28	343	1e-31	FBpp0077724	253290 multiple pterygium syndrome, lethal type; lmps; 608930 myasthenic syndrome, congenital, fast-channel; 601462 myasthenic syndrome, congenital, slow-channel; sccms;
NP_510870.1	BGIBMGA001309	0.54	312	6e-79	FBpp0072117	256000 leigh syndrome; ls;
NP_689629.2	BGIBMGA003182	0.4	205	1e-35	FBpp0311993	256000 leigh syndrome; ls;
NP_002479.1	BGIBMGA003301	0.55	80	9e-22	FBpp0077130	256000 leigh syndrome; ls;
NP_004542.1	BGIBMGA003447	0.6	194	7e-66	FBpp0072975	256000 leigh syndrome; ls;
NP_002487.1	BGIBMGA003924	0.83	175	9e-88	FBpp0082645	256000 leigh syndrome; ls;
NP_077718.3	BGIBMGA005137	0.74	169	2e-74	FBpp0309363	256000 leigh syndrome; ls;
NP_077718.3	BGIBMGA005439	0.75	187	7e-69	FBpp0309363	256000 leigh syndrome; ls;
NP_004542.1	BGIBMGA014483	0.73	208	1e-88	FBpp0072975	256000 leigh syndrome; ls;
NP_003163.1	BGIBMGA000722	0.47	244	2e-57	FBpp0076607	256000 leigh syndrome; ls;
NP_000099.2	BGIBMGA000292	0.66	483	0	FBpp0304195	256000 leigh syndrome; ls; 248600 maple syrup urine disease; msud;
NP_060017.1	BGIBMGA005943	0.38	424	1e-66	FBpp0080719	256000 leigh syndrome; ls; 252010 mitochondrial complex i deficiency;
NP_002486.1	BGIBMGA004009	0.57	133	5e-40	FBpp0074481	256000 leigh syndrome; ls; 252010 mitochondrial complex i deficiency;
NP_004534.2	BGIBMGA009282	0.47	54	3e-07	FBpp0083373	256030 nemaline myopathy 2; nem2;
NP_004534.2	BGIBMGA009778	0.69	55	6e-16	FBpp0075109	256030 nemaline myopathy 2; nem2;
NP_004637.1	BGIBMGA000160	0.47	85	1e-16	FBpp0308386	256300 nephrotic syndrome, type 1; nphs1;
NP_004637.1	BGIBMGA000163	0.31	125	9e-10	FBpp0308386	256300 nephrotic syndrome, type 1; nphs1;
NP_004637.1	BGIBMGA000164	0.28	726	5e-71	FBpp0087716	256300 nephrotic syndrome, type 1; nphs1;
NP_004637.1	BGIBMGA003795	0.27	124	8e-08	FBpp0311556	256300 nephrotic syndrome, type 1; nphs1;
NP_004637.1	BGIBMGA004750	0.26	204	3e-12	FBpp0288437	256300 nephrotic syndrome, type 1; nphs1;
NP_004637.1	BGIBMGA004767	0.23	118	4e-08	FBpp0292351	256300 nephrotic syndrome, type 1; nphs1;
NP_004637.1	BGIBMGA005029	0.25	285	2e-11	FBpp0110104	256300 nephrotic syndrome, type 1; nphs1;
NP_001161066.1	BGIBMGA003110	0.24	335	5e-14	FBpp0291533	256540 galactosialidosis; gsl;
NP_001161066.1	BGIBMGA003111	0.24	356	3e-16	FBpp0291533	256540 galactosialidosis; gsl;
AAA36476.1	BGIBMGA003112	0.29	435	5e-40	FBpp0307148	256540 galactosialidosis; gsl;
NP_001121167.1	BGIBMGA010348	0.25	388	2e-18	FBpp0072504	256540 galactosialidosis; gsl;
NP_001121167.1	BGIBMGA012773	0.38	170	6e-29	FBpp0291533	256540 galactosialidosis; gsl;
AAA36476.1	BGIBMGA013085	0.28	433	3e-39	FBpp0291533	256540 galactosialidosis; gsl;
NP_937818.1	BGIBMGA007701	0.77	148	1e-63	FBpp0312191	256700 neuroblastoma, susceptibility to;
NP_000301.1	BGIBMGA006016	0.27	237	2e-18	FBpp0079801	256730 ceroid lipofuscinosis, neuronal, 1; cln1;
NP_000301.1	BGIBMGA011835	0.55	256	7e-81	FBpp0311872	256730 ceroid lipofuscinosis, neuronal, 1; cln1;
NP_002428.1	BGIBMGA007722	0.42	172	3e-34	FBpp0088286	256810 mitochondrial dna depletion syndrome 6 (hepatocerebral type); mtdps6;
NP_002428.1	BGIBMGA011645	0.3	116	3e-09	FBpp0306211	256810 mitochondrial dna depletion syndrome 6 (hepatocerebral type); mtdps6;
NP_002428.1	BGIBMGA011828	0.25	170	3e-08	FBpp0309558	256810 mitochondrial dna depletion syndrome 6 (hepatocerebral type); mtdps6;
NP_002428.1	BGIBMGA011829	0.31	150	2e-11	FBpp0309558	256810 mitochondrial dna depletion syndrome 6 (hepatocerebral type); mtdps6;
NP_001007594.2	BGIBMGA003720	0.47	407	1e-110	FBpp0300565	257200 niemann-pick disease, type a; 607616 niemann-pick disease, type b;
BAF85077.1	BGIBMGA008045	0.3	354	2e-34	FBpp0305041	257200 niemann-pick disease, type a; 607616 niemann-pick disease, type b;
ADW08999.1	BGIBMGA012548	0.32	508	1e-63	FBpp0084990	257200 niemann-pick disease, type a; 607616 niemann-pick disease, type b;
NP_005699.1	BGIBMGA003304	0.46	216	4e-51	FBpp0305246	258315 omodysplasia 1; omod1;
ACH48232.1	BGIBMGA005628	0.43	471	2e-101	FBpp0083440	258900 orotic aciduria;
NP_000364.1	BGIBMGA009154	0.45	201	1e-42	FBpp0083440	258900 orotic aciduria;
NP_000851.2	BGIBMGA002939	0.32	201	1e-26	FBpp0075142	259100 hypertrophic osteoarthropathy, primary, autosomal recessive, 1; phoar1; 119900 digital clubbing, isolated congenital;
NP_000851.2	BGIBMGA002940	0.32	245	2e-30	FBpp0113028	259100 hypertrophic osteoarthropathy, primary, autosomal recessive, 1; phoar1; 119900 digital clubbing, isolated congenital;
NP_000851.2	BGIBMGA002941	0.33	245	2e-30	FBpp0113028	259100 hypertrophic osteoarthropathy, primary, autosomal recessive, 1; phoar1; 119900 digital clubbing, isolated congenital;
AAA89175.1	BGIBMGA002942	0.33	197	2e-26	FBpp0300159	259100 hypertrophic osteoarthropathy, primary, autosomal recessive, 1; phoar1; 119900 digital clubbing, isolated congenital;
NP_001139288.1	BGIBMGA002943	0.38	99	6e-11	FBpp0309547	259100 hypertrophic osteoarthropathy, primary, autosomal recessive, 1; phoar1; 119900 digital clubbing, isolated congenital;
NP_000851.2	BGIBMGA002944	0.28	224	1e-18	FBpp0113028	259100 hypertrophic osteoarthropathy, primary, autosomal recessive, 1; phoar1; 119900 digital clubbing, isolated congenital;
NP_000851.2	BGIBMGA002945	0.33	160	4e-13	FBpp0113029	259100 hypertrophic osteoarthropathy, primary, autosomal recessive, 1; phoar1; 119900 digital clubbing, isolated congenital;
NP_000851.2	BGIBMGA003940	0.31	179	1e-18	FBpp0113029	259100 hypertrophic osteoarthropathy, primary, autosomal recessive, 1; phoar1; 119900 digital clubbing, isolated congenital;
NP_000851.2	BGIBMGA003941	0.36	199	4e-29	FBpp0113028	259100 hypertrophic osteoarthropathy, primary, autosomal recessive, 1; phoar1; 119900 digital clubbing, isolated congenital;
NP_000851.2	BGIBMGA003942	0.31	189	2e-18	FBpp0113029	259100 hypertrophic osteoarthropathy, primary, autosomal recessive, 1; phoar1; 119900 digital clubbing, isolated congenital;
NP_000851.2	BGIBMGA003956	0.34	209	4e-30	FBpp0113029	259100 hypertrophic osteoarthropathy, primary, autosomal recessive, 1; phoar1; 119900 digital clubbing, isolated congenital;
NP_000851.2	BGIBMGA005248	0.28	192	6e-17	FBpp0291423	259100 hypertrophic osteoarthropathy, primary, autosomal recessive, 1; phoar1; 119900 digital clubbing, isolated congenital;
AAA89175.1	BGIBMGA005808	0.3	188	8e-15	FBpp0071071	259100 hypertrophic osteoarthropathy, primary, autosomal recessive, 1; phoar1; 119900 digital clubbing, isolated congenital;
NP_000851.2	BGIBMGA005826	0.36	193	4e-23	FBpp0113029	259100 hypertrophic osteoarthropathy, primary, autosomal recessive, 1; phoar1; 119900 digital clubbing, isolated congenital;
NP_000851.2	BGIBMGA005827	0.37	194	4e-27	FBpp0113029	259100 hypertrophic osteoarthropathy, primary, autosomal recessive, 1; phoar1; 119900 digital clubbing, isolated congenital;
NP_000851.2	BGIBMGA005828	0.28	216	1e-15	FBpp0075142	259100 hypertrophic osteoarthropathy, primary, autosomal recessive, 1; phoar1; 119900 digital clubbing, isolated congenital;
NP_000851.2	BGIBMGA005831	0.36	188	2e-23	FBpp0113028	259100 hypertrophic osteoarthropathy, primary, autosomal recessive, 1; phoar1; 119900 digital clubbing, isolated congenital;
NP_000851.2	BGIBMGA005832	0.36	188	2e-23	FBpp0113028	259100 hypertrophic osteoarthropathy, primary, autosomal recessive, 1; phoar1; 119900 digital clubbing, isolated congenital;
NP_000851.2	BGIBMGA008902	0.27	131	8e-08	FBpp0303796	259100 hypertrophic osteoarthropathy, primary, autosomal recessive, 1; phoar1; 119900 digital clubbing, isolated congenital;
NP_000851.2	BGIBMGA010512	0.34	186	2e-15	FBpp0070179	259100 hypertrophic osteoarthropathy, primary, autosomal recessive, 1; phoar1; 119900 digital clubbing, isolated congenital;
NP_000851.2	BGIBMGA011860	0.39	203	1e-39	FBpp0075142	259100 hypertrophic osteoarthropathy, primary, autosomal recessive, 1; phoar1; 119900 digital clubbing, isolated congenital;
NP_000851.2	BGIBMGA013161	0.33	145	3e-14	FBpp0070179	259100 hypertrophic osteoarthropathy, primary, autosomal recessive, 1; phoar1; 119900 digital clubbing, isolated congenital;
NP_000851.2	BGIBMGA014024	0.33	188	7e-23	FBpp0113028	259100 hypertrophic osteoarthropathy, primary, autosomal recessive, 1; phoar1; 119900 digital clubbing, isolated congenital;
NP_000851.2	BGIBMGA014025	0.33	188	3e-24	FBpp0113028	259100 hypertrophic osteoarthropathy, primary, autosomal recessive, 1; phoar1; 119900 digital clubbing, isolated congenital;
NP_000851.2	BGIBMGA014030	0.33	212	2e-17	FBpp0113028	259100 hypertrophic osteoarthropathy, primary, autosomal recessive, 1; phoar1; 119900 digital clubbing, isolated congenital;
NP_000851.2	BGIBMGA014031	0.32	212	1e-23	FBpp0300159	259100 hypertrophic osteoarthropathy, primary, autosomal recessive, 1; phoar1; 119900 digital clubbing, isolated congenital;
NP_000851.2	BGIBMGA014291	0.41	74	6e-09	FBpp0113029	259100 hypertrophic osteoarthropathy, primary, autosomal recessive, 1; phoar1; 119900 digital clubbing, isolated congenital;
NP_000851.2	BGIBMGA014342	0.39	75	2e-08	FBpp0113029	259100 hypertrophic osteoarthropathy, primary, autosomal recessive, 1; phoar1; 119900 digital clubbing, isolated congenital;
NP_000851.2	BGIBMGA014620	0.32	188	2e-22	FBpp0113028	259100 hypertrophic osteoarthropathy, primary, autosomal recessive, 1; phoar1; 119900 digital clubbing, isolated congenital;
NP_000933.1	BGIBMGA002151	0.5	143	6e-28	FBpp0072463	259440 osteogenesis imperfecta, type ix; oi9;
NP_000933.1	BGIBMGA002786	0.45	144	2e-22	FBpp0086323	259440 osteogenesis imperfecta, type ix; oi9;
NP_000933.1	BGIBMGA003932	0.3	159	1e-12	FBpp0084258	259440 osteogenesis imperfecta, type ix; oi9;
NP_000933.1	BGIBMGA004059	0.69	192	8e-67	FBpp0311613	259440 osteogenesis imperfecta, type ix; oi9;
NP_000933.1	BGIBMGA004163	0.51	143	8e-26	FBpp0310092	259440 osteogenesis imperfecta, type ix; oi9;
NP_000933.1	BGIBMGA006771	0.56	160	6e-47	FBpp0298837	259440 osteogenesis imperfecta, type ix; oi9;
NP_000933.1	BGIBMGA008977	0.35	155	3e-12	FBpp0084113	259440 osteogenesis imperfecta, type ix; oi9;
NP_000933.1	BGIBMGA009341	0.44	113	7e-14	FBpp0305988	259440 osteogenesis imperfecta, type ix; oi9;
NP_000933.1	BGIBMGA009740	0.43	115	4e-13	FBpp0075761	259440 osteogenesis imperfecta, type ix; oi9;
CAG33110.1	BGIBMGA013557	0.51	94	4e-22	FBpp0077688	259440 osteogenesis imperfecta, type ix; oi9;
AAH11949.1	BGIBMGA000934	0.3	247	4e-26	FBpp0311998	259730 osteopetrosis, autosomal recessive 3; optb3;
NP_000058.1	BGIBMGA002647	0.52	178	2e-39	FBpp0080116	259730 osteopetrosis, autosomal recessive 3; optb3;
AAH11949.1	BGIBMGA008042	0.39	221	5e-35	FBpp0311871	259730 osteopetrosis, autosomal recessive 3; optb3;
AAH11949.1	BGIBMGA008043	0.28	199	1e-14	FBpp0075733	259730 osteopetrosis, autosomal recessive 3; optb3;
AAH11949.1	BGIBMGA008072	0.31	251	2e-29	FBpp0084503	259730 osteopetrosis, autosomal recessive 3; optb3;
NP_000058.1	BGIBMGA013577	0.41	54	7e-06		259730 osteopetrosis, autosomal recessive 3; optb3;
NP_000058.1	BGIBMGA013578	0.35	106	2e-11	FBpp0112225	259730 osteopetrosis, autosomal recessive 3; optb3;
NP_064608.2	BGIBMGA003536	0.32	343	1e-44	FBpp0310751	259775 raine syndrome; rns;
NP_064608.2	BGIBMGA007012	0.59	348	6e-119	FBpp0307565	259775 raine syndrome; rns;
NP_057122.2	BGIBMGA006735	0.65	245	6e-91	FBpp0303093	260400 shwachman-diamond syndrome; sds;
AAA62202.1	BGIBMGA011019	0.46	261	3e-53	FBpp0087757	260600 leukodystrophy, hypomyelinating, 3; hld3;
BAD92959.1	BGIBMGA013075	0.34	271	8e-27	FBpp0305315	260920 hyper-igd syndrome; hids; 610377 mevalonic aciduria; meva;
NP_000405.1	BGIBMGA001929	0.48	732	3e-178	FBpp0309384	261515 d-bifunctional protein deficiency; 233400 perrault syndrome 1; prlts1;
BAG52804.1	BGIBMGA007118	0.37	100	8e-13	FBpp0084585	261515 d-bifunctional protein deficiency; 233400 perrault syndrome 1; prlts1;
BAG35356.1	BGIBMGA008987	0.31	201	8e-12	FBpp0077075	261515 d-bifunctional protein deficiency; 233400 perrault syndrome 1; prlts1;
NP_919299.3	BGIBMGA006682	0.39	148	7e-21	FBpp0309830	261540 peters-plus syndrome;
NP_919299.3	BGIBMGA006683	0.43	175	2e-27	FBpp0078855	261540 peters-plus syndrome;
NP_000311.2	BGIBMGA003987	0.57	228	1e-63	FBpp0099972	261630 hyperphenylalaninemia, bh4-deficient, c; hpabh4c;
NP_000308.1	BGIBMGA003643	0.64	131	2e-47	FBpp0088417	261640 hyperphenylalaninemia, bh4-deficient, a; hpabh4a;
NP_001027005.1	BGIBMGA003008	0.46	997	0	FBpp0079254	261750 glycogen storage disease ixb; gsd9b;
NP_203129.1	BGIBMGA003208	0.66	203	2e-80	FBpp0302972	262700 pituitary hormone deficiency, combined, 4; cphd4;
NP_203129.1	BGIBMGA003888	0.43	127	1e-22	FBpp0303104	262700 pituitary hormone deficiency, combined, 4; cphd4;
NP_203129.1	BGIBMGA012234	0.4	177	7e-36	FBpp0305971	262700 pituitary hormone deficiency, combined, 4; cphd4;
NP_203129.1	BGIBMGA012987	0.55	69	2e-14	FBpp0304121	262700 pituitary hormone deficiency, combined, 4; cphd4;
NP_000366.1	BGIBMGA000197	0.3	257	4e-28	FBpp0305783	263700 porphyria, congenital erythropoietic;
NP_000776.1	BGIBMGA001277	0.31	332	2e-31	FBpp0083144	264700 vitamin d hydroxylation-deficient rickets, type 1a; vddr1a;
NP_000776.1	BGIBMGA005356	0.28	384	1e-28	FBpp0083144	264700 vitamin d hydroxylation-deficient rickets, type 1a; vddr1a;
NP_000776.1	BGIBMGA009522	0.28	364	2e-32	FBpp0086937	264700 vitamin d hydroxylation-deficient rickets, type 1a; vddr1a;
NP_000776.1	BGIBMGA009523	0.32	378	1e-44	FBpp0293134	264700 vitamin d hydroxylation-deficient rickets, type 1a; vddr1a;
NP_000387.1	BGIBMGA004622	0.36	210	3e-33	FBpp0079644	265800 pycnodysostosis;
NP_000387.1	BGIBMGA005131	0.37	294	5e-46	FBpp0078465	265800 pycnodysostosis;
NP_000387.1	BGIBMGA006893	0.43	75	3e-11	FBpp0075508	265800 pycnodysostosis;
NP_000387.1	BGIBMGA009139	0.39	301	4e-55	FBpp0075508	265800 pycnodysostosis;
NP_000387.1	BGIBMGA009146	0.31	194	4e-22	FBpp0075508	265800 pycnodysostosis;
NP_000387.1	BGIBMGA009184	0.33	293	4e-40	FBpp0075508	265800 pycnodysostosis;
NP_000387.1	BGIBMGA009230	0.39	201	7e-29	FBpp0292990	265800 pycnodysostosis;
NP_000387.1	BGIBMGA011342	0.46	308	1e-82	FBpp0086719	265800 pycnodysostosis;
NP_060859.4	BGIBMGA000854	0.53	242	3e-69	FBpp0081352	266265 congenital disorder of glycosylation, type iic; cdg2c;
NP_000279.1	BGIBMGA001282	0.3	81	8e-06	FBpp0076028	266500 refsum disease, classic; 215100 rhizomelic chondrodysplasia punctata, type 1; rcdp1;
NP_000279.1	BGIBMGA003015	0.23	174	1e-08	FBpp0310217	266500 refsum disease, classic; 215100 rhizomelic chondrodysplasia punctata, type 1; rcdp1;
NP_000279.1	BGIBMGA008884	0.26	232	4e-18	FBpp0078363	266500 refsum disease, classic; 215100 rhizomelic chondrodysplasia punctata, type 1; rcdp1;
NP_000279.1	BGIBMGA010858	0.47	187	2e-41	FBpp0271836	266500 refsum disease, classic; 215100 rhizomelic chondrodysplasia punctata, type 1; rcdp1;
NP_000279.1	BGIBMGA010859	0.45	93	1e-17	FBpp0271836	266500 refsum disease, classic; 215100 rhizomelic chondrodysplasia punctata, type 1; rcdp1;
NP_000279.1	BGIBMGA012127	0.3	168	6e-14	FBpp0307248	266500 refsum disease, classic; 215100 rhizomelic chondrodysplasia punctata, type 1; rcdp1;
NP_000279.1	BGIBMGA014058	0.19	202	7e-06	FBpp0075704	266500 refsum disease, classic; 215100 rhizomelic chondrodysplasia punctata, type 1; rcdp1;
NP_001017420.1	BGIBMGA004268	0.38	239	9e-40	FBpp0099670	268300 roberts syndrome; rbs; 269000 sc phocomelia syndrome;
NP_055954.1	BGIBMGA002053	0.55	313	9e-97	FBpp0289098	269250 schneckenbecken dysplasia;
NP_116056.3	BGIBMGA000088	0.45	65	3e-12	FBpp0070426	269700 lipodystrophy, congenital generalized, type 2; cgl2; 600794 neuronopathy, distal hereditary motor, type va; hmn5a; 270685 spastic paraplegia 17, autosomal dominant; spg17;
NP_001026976.1	BGIBMGA001965	0.47	386	7e-104	FBpp0302794	270200 sjogren-larsson syndrome; sls;
NP_001026976.1	BGIBMGA001966	0.42	454	8e-106	FBpp0302795	270200 sjogren-larsson syndrome; sls;
NP_000866.1	BGIBMGA008240	0.41	123	3e-19	FBpp0292852	270450 insulin-like growth factor i, resistance to;
EAX02222.1	BGIBMGA008597	0.23	573	3e-22	FBpp0311935	270450 insulin-like growth factor i, resistance to;
NP_006173.2	BGIBMGA000491	0.35	241	4e-37	FBpp0311100	271665 spondylometaepiphyseal dysplasia, short limb-hand type;
NP_006173.2	BGIBMGA000492	0.29	136	1e-11	FBpp0292228	271665 spondylometaepiphyseal dysplasia, short limb-hand type;
NP_006173.2	BGIBMGA000587	0.44	295	5e-68	FBpp0311100	271665 spondylometaepiphyseal dysplasia, short limb-hand type;
NP_006173.2	BGIBMGA010927	0.34	127	5e-15	FBpp0293864	271665 spondylometaepiphyseal dysplasia, short limb-hand type;
NP_714941.1	BGIBMGA013791	0.38	375	1e-57	FBpp0309066	271930 striatonigral degeneration, infantile; sndi;
NP_877437.2	BGIBMGA000290	0.51	245	1e-69	FBpp0072436	272200 multiple sulfatase deficiency; msd;
BAF83906.1	BGIBMGA007111	0.63	1024	0	FBpp0071273	274270 dihydropyrimidine dehydrogenase deficiency;
NP_000101.2	BGIBMGA012701	0.28	232	3e-10	FBpp0075103	274270 dihydropyrimidine dehydrogenase deficiency;
NP_000444.1	BGIBMGA000687	0.34	181	2e-20	FBpp0081881	274400 thyroid dyshormonogenesis 1; tdh1;
NP_000444.1	BGIBMGA002324	0.29	454	3e-38	FBpp0308311	274400 thyroid dyshormonogenesis 1; tdh1;
NP_000444.1	BGIBMGA002621	0.3	257	1e-25	FBpp0081881	274400 thyroid dyshormonogenesis 1; tdh1;
NP_000444.1	BGIBMGA002623	0.31	423	5e-47	FBpp0081881	274400 thyroid dyshormonogenesis 1; tdh1;
NP_000444.1	BGIBMGA005988	0.32	538	1e-49	FBpp0079253	274400 thyroid dyshormonogenesis 1; tdh1;
NP_000444.1	BGIBMGA006860	0.32	337	5e-44	FBpp0312161	274400 thyroid dyshormonogenesis 1; tdh1;
NP_000444.1	BGIBMGA012132	0.26	237	9e-15	FBpp0081881	274400 thyroid dyshormonogenesis 1; tdh1;
NP_000444.1	BGIBMGA012502	0.36	176	5e-22	FBpp0073268	274400 thyroid dyshormonogenesis 1; tdh1;
ADQ32120.1	BGIBMGA013646	0.6	191	8e-60	FBpp0290579	274800 thyroid dyshormonogenesis 4; tdh4;
NP_000344.1	BGIBMGA002986	0.53	405	2e-124	FBpp0308581	276600 tyrosinemia, type ii;
NP_000344.1	BGIBMGA007391	0.24	255	4e-07	FBpp0075971	276600 tyrosinemia, type ii;
NP_000344.1	BGIBMGA007921	0.26	155	7e-13	FBpp0081996	276600 tyrosinemia, type ii;
NP_000344.1	BGIBMGA011983	0.26	315	3e-16	FBpp0308869	276600 tyrosinemia, type ii;
NP_000344.1	BGIBMGA011984	0.24	328	2e-08	FBpp0308869	276600 tyrosinemia, type ii;
NP_000128.1	BGIBMGA007438	0.59	415	1e-144	FBpp0073134	276700 tyrosinemia, type i;
NP_000483.3	BGIBMGA007784	0.33	439	5e-66	FBpp0303069	277180 vas deferens, congenital bilateral aplasia of; cbavd; 219700 cystic fibrosis; cf; 211400 bronchiectasis with or without elevated sweat chloride 1; besc1; 167800 pancreatitis, hereditary; pctt;
AAA35680.1	BGIBMGA007869	0.3	142	2e-08	FBpp0310240	277180 vas deferens, congenital bilateral aplasia of; cbavd; 219700 cystic fibrosis; cf; 211400 bronchiectasis with or without elevated sweat chloride 1; besc1; 167800 pancreatitis, hereditary; pctt;
NP_112219.2	BGIBMGA001434	0.33	111	7e-09	FBpp0290306	277600 weill-marchesani syndrome 1; wms1;
NP_112219.2	BGIBMGA001435	0.33	472	1e-70	FBpp0290305	277600 weill-marchesani syndrome 1; wms1;
NP_112219.2	BGIBMGA001969	0.33	290	2e-37	FBpp0301591	277600 weill-marchesani syndrome 1; wms1;
NP_112219.2	BGIBMGA013967	0.34	131	2e-19	FBpp0298832	277600 weill-marchesani syndrome 1; wms1;
BAD18561.1	BGIBMGA013969	0.32	153	1e-25	FBpp0290222	277600 weill-marchesani syndrome 1; wms1;
NP_000544.2	BGIBMGA003312	0.41	148	2e-19	FBpp0300531	277700 werner syndrome; wrn;
NP_000544.2	BGIBMGA004822	0.24	165	2e-07	FBpp0081324	277700 werner syndrome; wrn;
BAG52380.1	BGIBMGA004157	0.34	363	4e-57	FBpp0304062	278000 lysosomal acid lipase deficiency;
NP_001121077.1	BGIBMGA004200	0.36	364	3e-58	FBpp0304062	278000 lysosomal acid lipase deficiency;
BAF82930.1	BGIBMGA004708	0.37	368	7e-71	FBpp0304062	278000 lysosomal acid lipase deficiency;
NP_001121077.1	BGIBMGA005673	0.35	365	1e-57	FBpp0079693	278000 lysosomal acid lipase deficiency;
BAF82930.1	BGIBMGA005695	0.32	366	2e-54	FBpp0079693	278000 lysosomal acid lipase deficiency;
NP_001121077.1	BGIBMGA006149	0.4	290	4e-57	FBpp0293062	278000 lysosomal acid lipase deficiency;
NP_001121077.1	BGIBMGA009179	0.3	368	7e-39	FBpp0309221	278000 lysosomal acid lipase deficiency;
CAA83495.1	BGIBMGA010639	0.34	383	1e-56	FBpp0079693	278000 lysosomal acid lipase deficiency;
CAA83495.1	BGIBMGA010640	0.35	383	3e-59	FBpp0079693	278000 lysosomal acid lipase deficiency;
NP_001121077.1	BGIBMGA011072	0.36	368	8e-62	FBpp0293062	278000 lysosomal acid lipase deficiency;
BAG52380.1	BGIBMGA011777	0.38	384	3e-72	FBpp0079693	278000 lysosomal acid lipase deficiency;
NP_001121077.1	BGIBMGA012649	0.34	370	2e-54	FBpp0304062	278000 lysosomal acid lipase deficiency;
NP_001121077.1	BGIBMGA012745	0.35	372	4e-59	FBpp0303791	278000 lysosomal acid lipase deficiency;
CAA83495.1	BGIBMGA014239	0.33	389	9e-49	FBpp0079693	278000 lysosomal acid lipase deficiency;
ADQ31728.1	BGIBMGA014267	0.32	373	4e-40	FBpp0079683	278000 lysosomal acid lipase deficiency;
NP_001121077.1	BGIBMGA014275	0.45	117	8e-23	FBpp0303791	278000 lysosomal acid lipase deficiency;
NP_001121077.1	BGIBMGA014574	0.35	370	3e-59	FBpp0304062	278000 lysosomal acid lipase deficiency;
NP_001121077.1	BGIBMGA014575	0.35	370	3e-57	FBpp0079693	278000 lysosomal acid lipase deficiency;
BAG51748.1	BGIBMGA003862	0.63	742	0	FBpp0305775	300009 dent disease 1; 300554 hypophosphatemic rickets, x-linked recessive; 310468 nephrolithiasis, x-linked recessive, with renal failure; xrn; 308990 proteinuria, low molecular weight, with hypercalciuria and nephrocalcinosis;
NP_060215.4	BGIBMGA002412	0.39	227	6e-34	FBpp0305024	300166 microphthalmia, syndromic 2; mcops2;
NP_001036002.1	BGIBMGA002636	0.46	299	8e-51	FBpp0305540	300243 mental retardation, x-linked, syndromic, christianson type; mrxsch;
NP_006350.1	BGIBMGA002637	0.65	105	3e-26	FBpp0305540	300243 mental retardation, x-linked, syndromic, christianson type; mrxsch;
BAG62192.1	BGIBMGA004271	0.22	311	8e-10	FBpp0305540	300243 mental retardation, x-linked, syndromic, christianson type; mrxsch;
NP_006350.1	BGIBMGA011831	0.34	412	1e-56	FBpp0306289	300243 mental retardation, x-linked, syndromic, christianson type; mrxsch;
NP_741995.1	BGIBMGA001903	0.4	165	6e-33	FBpp0304216	300271 mental retardation, x-linked 72; mrx72;
NP_741995.1	BGIBMGA001928	0.47	188	1e-46	FBpp0307641	300271 mental retardation, x-linked 72; mrx72;
NP_741995.1	BGIBMGA002203	0.34	149	2e-22	FBpp0070814	300271 mental retardation, x-linked 72; mrx72;
AAL12244.1	BGIBMGA002209	0.44	207	2e-41	FBpp0083413	300271 mental retardation, x-linked 72; mrx72;
AAL12244.1	BGIBMGA002449	0.42	165	5e-35	FBpp0084111	300271 mental retardation, x-linked 72; mrx72;
NP_741995.1	BGIBMGA003266	0.38	136	1e-21	FBpp0072029	300271 mental retardation, x-linked 72; mrx72;
AAL12244.1	BGIBMGA003597	0.39	159	3e-30	FBpp0312096	300271 mental retardation, x-linked 72; mrx72;
NP_741995.1	BGIBMGA004846	0.46	187	8e-42	FBpp0300990	300271 mental retardation, x-linked 72; mrx72;
NP_741995.1	BGIBMGA006221	0.43	151	7e-34	FBpp0310268	300271 mental retardation, x-linked 72; mrx72;
AAL12244.1	BGIBMGA006641	0.42	192	7e-37	FBpp0086009	300271 mental retardation, x-linked 72; mrx72;
NP_741995.1	BGIBMGA006956	0.45	162	1e-35	FBpp0304179	300271 mental retardation, x-linked 72; mrx72;
AAL12244.1	BGIBMGA007814	0.24	144	3e-06	FBpp0077029	300271 mental retardation, x-linked 72; mrx72;
NP_741995.1	BGIBMGA009361	0.39	191	2e-36	FBpp0301227	300271 mental retardation, x-linked 72; mrx72;
NP_741995.1	BGIBMGA011280	0.53	193	1e-60	FBpp0298273	300271 mental retardation, x-linked 72; mrx72;
AAL12244.1	BGIBMGA014560	0.43	164	2e-30	FBpp0084111	300271 mental retardation, x-linked 72; mrx72;
AAB32284.1	BGIBMGA004570	0.48	548	3e-170	FBpp0088910	300352 cerebral creatine deficiency syndrome 1; ccds1;
AAB32284.1	BGIBMGA008026	0.39	168	3e-24	FBpp0290385	300352 cerebral creatine deficiency syndrome 1; ccds1;
NP_003579.3	BGIBMGA002161	0.31	159	2e-18	FBpp0085255	300354 mental retardation, x-linked, with short stature, hypogonadism, and abnormal gait;
AAK16812.1	BGIBMGA005147	0.3	188	4e-12	FBpp0072065	300354 mental retardation, x-linked, with short stature, hypogonadism, and abnormal gait;
CAD97843.1	BGIBMGA005758	0.65	775	0	FBpp0290569	300354 mental retardation, x-linked, with short stature, hypogonadism, and abnormal gait;
CAD97843.1	BGIBMGA009674	0.32	621	2e-84	FBpp0087924	300354 mental retardation, x-linked, with short stature, hypogonadism, and abnormal gait;
CAD97843.1	BGIBMGA011511	0.29	572	1e-58	FBpp0084786	300354 mental retardation, x-linked, with short stature, hypogonadism, and abnormal gait;
CAD97843.1	BGIBMGA013548	0.4	564	9e-110	FBpp0291369	300354 mental retardation, x-linked, with short stature, hypogonadism, and abnormal gait;
ABM86450.1	BGIBMGA013517	0.36	337	2e-43	FBpp0080045	300472 corpus callosum, agenesis of, with mental retardation, ocular coloboma, and micrognathia;
NP_004178.2	BGIBMGA002097	0.26	152	1e-08	FBpp0076196	300534 mental retardation, x-linked, syndromic, claes-jensen type; mrxscj;
NP_004178.2	BGIBMGA002098	0.28	298	5e-31	FBpp0076196	300534 mental retardation, x-linked, syndromic, claes-jensen type; mrxscj;
ACE86790.1	BGIBMGA004558	0.47	1267	0	FBpp0311492	300534 mental retardation, x-linked, syndromic, claes-jensen type; mrxscj;
NP_004178.2	BGIBMGA005883	0.35	96	4e-08	FBpp0304067	300534 mental retardation, x-linked, syndromic, claes-jensen type; mrxscj;
NP_004178.2	BGIBMGA008774	0.33	242	2e-31	FBpp0302636	300534 mental retardation, x-linked, syndromic, claes-jensen type; mrxscj;
NP_004178.2	BGIBMGA010596	0.59	491	4e-176	FBpp0311492	300534 mental retardation, x-linked, syndromic, claes-jensen type; mrxscj;
NP_004178.2	BGIBMGA011343	0.52	46	6e-10	FBpp0307738	300534 mental retardation, x-linked, syndromic, claes-jensen type; mrxscj;
NP_001578.2	BGIBMGA006041	0.45	666	1e-164	FBpp0304837	300555 dent disease 2; 309000 lowe oculocerebrorenal syndrome; ocrl;
AAH94726.1	BGIBMGA010603	0.35	358	5e-50	FBpp0300559	300555 dent disease 2; 309000 lowe oculocerebrorenal syndrome; ocrl;
NP_075386.1	BGIBMGA003685	0.31	417	3e-40	FBpp0309967	300676 mental retardation, x-linked, syndromic 14; mrxs14;
NP_003482.1	BGIBMGA008494	0.34	127	2e-08	FBpp0302739	300855 ogden syndrome; ogdns;
NP_003482.1	BGIBMGA011824	0.83	155	8e-72	FBpp0076078	300855 ogden syndrome; ogdns;
NP_000160.1	BGIBMGA004000	0.43	373	6e-86	FBpp0086316	301500 fabry disease;
NP_000160.1	BGIBMGA013988	0.43	297	1e-77	FBpp0079549	301500 fabry disease;
NP_002755.1	BGIBMGA001386	0.88	317	1e-159	FBpp0311282	301835 arts syndrome; arts; 311070 charcot-marie-tooth disease, x-linked recessive, 5; cmtx5; 304500 deafness, x-linked 1; dfnx1; 300661 phosphoribosylpyrophosphate synthetase superactivity;
NP_002755.1	BGIBMGA001570	0.74	317	8e-137	FBpp0311282	301835 arts syndrome; arts; 311070 charcot-marie-tooth disease, x-linked recessive, 5; cmtx5; 304500 deafness, x-linked 1; dfnx1; 300661 phosphoribosylpyrophosphate synthetase superactivity;
NP_002755.1	BGIBMGA014335	0.47	101	3e-20	FBpp0307424	301835 arts syndrome; arts; 311070 charcot-marie-tooth disease, x-linked recessive, 5; cmtx5; 304500 deafness, x-linked 1; dfnx1; 300661 phosphoribosylpyrophosphate synthetase superactivity;
BAD96889.1	BGIBMGA014442	0.5	201	4e-49	FBpp0307424	301835 arts syndrome; arts; 311070 charcot-marie-tooth disease, x-linked recessive, 5; cmtx5; 304500 deafness, x-linked 1; dfnx1; 300661 phosphoribosylpyrophosphate synthetase superactivity;
NP_115834.1	BGIBMGA001789	0.34	118	4e-12	FBpp0305674	301900 borjeson-forssman-lehmann syndrome; bfls;
CAB37831.1	BGIBMGA001924	0.31	374	1e-35	FBpp0305767	303350 masa syndrome; 304100 corpus callosum, partial agenesis of, x-linked; 307000 hydrocephalus due to congenital stenosis of aqueduct of sylvius; hsas;
NP_076493.1	BGIBMGA005772	0.28	267	2e-17	FBpp0305703	303350 masa syndrome; 304100 corpus callosum, partial agenesis of, x-linked; 307000 hydrocephalus due to congenital stenosis of aqueduct of sylvius; hsas;
CAA42508.1	BGIBMGA014065	0.28	726	7e-65	FBpp0305702	303350 masa syndrome; 304100 corpus callosum, partial agenesis of, x-linked; 307000 hydrocephalus due to congenital stenosis of aqueduct of sylvius; hsas;
NP_004420.1	BGIBMGA009670	0.38	107	6e-12	FBpp0088146	304110 craniofrontonasal syndrome; cfns;
NP_004454.2	BGIBMGA002693	0.24	293	3e-09	FBpp0085412	305400 aarskog-scott syndrome; aas;
NP_004454.2	BGIBMGA005960	0.28	170	3e-06	FBpp0306189	305400 aarskog-scott syndrome; aas;
NP_000283.1	BGIBMGA000892	0.65	488	0	FBpp0309977	306000 glycogen storage disease ixa1; gsd9a1;
NP_976325.1	BGIBMGA000572	0.56	230	2e-75	FBpp0072428	307030 hyperglycerolemia;
NP_001121599.1	BGIBMGA004062	0.32	435	2e-59	FBpp0072858	307030 hyperglycerolemia;
NP_976325.1	BGIBMGA006727	0.22	457	7e-13	FBpp0301747	307030 hyperglycerolemia;
NP_001121599.1	BGIBMGA006858	0.57	213	2e-69	FBpp0297145	307030 hyperglycerolemia;
AAH71595.1	BGIBMGA008953	0.22	270	2e-10	FBpp0072428	307030 hyperglycerolemia;
NP_001121599.1	BGIBMGA013299	0.47	507	3e-128	FBpp0311803	307030 hyperglycerolemia;
BAG37008.1	BGIBMGA000972	0.39	59	5e-08	FBpp0303536	307200 isolated growth hormone deficiency, type iii; ighd3; 300755 agammaglobulinemia, x-linked; xla;
NP_000052.1	BGIBMGA000973	0.46	167	6e-30	FBpp0303536	307200 isolated growth hormone deficiency, type iii; ighd3; 300755 agammaglobulinemia, x-linked; xla;
NP_000275.1	BGIBMGA009515	0.55	379	1e-124	FBpp0070677	308930 leigh syndrome, x-linked; 312170 pyruvate dehydrogenase e1-alpha deficiency; pdhad;
CAB94714.1	BGIBMGA011235	0.44	1157	0	FBpp0306530	309400 menkes disease; 304150 occipital horn syndrome; ohs; 300489 spinal muscular atrophy, distal, x-linked 3; smax3;
NP_652766.1	BGIBMGA004982	0.4	115	2e-26	FBpp0084140	309500 renpenning syndrome 1; rens1;
BAG63815.1	BGIBMGA007554	0.46	254	4e-59	FBpp0074653	309520 lujan-fryns syndrome; 305450 opitz-kaveggia syndrome; oks;
NP_005111.2	BGIBMGA014277	0.44	102	5e-13	FBpp0074653	309520 lujan-fryns syndrome; 305450 opitz-kaveggia syndrome; oks;
NP_001484.1	BGIBMGA001119	0.68	447	2e-162	FBpp0311558	309541 html::element=hash(0x1605d78);
NP_004586.2	BGIBMGA005897	0.27	228	6e-11	FBpp0297149	309583 mental retardation, x-linked, syndromic, snyder-robinson type; mrxssr;
NP_004586.2	BGIBMGA012707	0.38	155	2e-24	FBpp0312081	309583 mental retardation, x-linked, syndromic, snyder-robinson type; mrxssr;
NP_004586.2	BGIBMGA012708	0.41	148	3e-32	FBpp0312082	309583 mental retardation, x-linked, syndromic, snyder-robinson type; mrxssr;
NP_005324.3	BGIBMGA009964	0.57	266	1e-74	FBpp0307185	309801 microphthalmia, syndromic 7; mcops7;
NP_000193.1	BGIBMGA001291	0.47	511	5e-120	FBpp0072939	309900 mucopolysaccharidosis type ii;
NP_000243.1	BGIBMGA014084	0.29	407	5e-34	FBpp0289662	310400 myopathy, centronuclear, x-linked; cnmx;
NP_955772.1	BGIBMGA007755	0.24	230	2e-09	FBpp0304959	312080 pelizaeus-merzbacher disease; pmd; 312920 spastic paraplegia 2, x-linked; spg2;
NP_055378.1	BGIBMGA008717	0.69	138	5e-55	FBpp0075246	313400 spondyloepiphyseal dysplasia tarda, x-linked; sedt;
NP_078790.2	BGIBMGA000640	0.37	190	3e-33	FBpp0074694	600081 vitamin d hydroxylation-deficient rickets, type 1b; vddr1b;
NP_036365.1	BGIBMGA003034	0.3	485	3e-63	FBpp0077582	600118 warburg micro syndrome 1; warbm1;
NP_036365.1	BGIBMGA003035	0.43	295	3e-57	FBpp0077582	600118 warburg micro syndrome 1; warbm1;
NP_003650.1	BGIBMGA007125	0.52	540	1e-160	FBpp0292773	600121 rhizomelic chondrodysplasia punctata, type 3; rcdp3;
NP_006028.2	BGIBMGA005759	0.34	386	2e-56	FBpp0298372	600430 brachydactyly-mental retardation syndrome; bdmr;
NP_006028.2	BGIBMGA009398	0.27	160	8e-08	FBpp0293582	600430 brachydactyly-mental retardation syndrome; bdmr;
NP_006028.2	BGIBMGA009917	0.51	369	1e-97	FBpp0300800	600430 brachydactyly-mental retardation syndrome; bdmr;
NP_006028.2	BGIBMGA011747	0.35	143	2e-17	FBpp0073173	600430 brachydactyly-mental retardation syndrome; bdmr;
NP_006028.2	BGIBMGA013166	0.27	281	1e-20	FBpp0078414	600430 brachydactyly-mental retardation syndrome; bdmr;
NP_079491.2	BGIBMGA008689	0.46	324	6e-75	FBpp0291529	600462 myopathy, lactic acidosis, and sideroblastic anemia 1; mlasa1;
BAF83388.1	BGIBMGA010612	0.35	85	2e-10	FBpp0296961	600501 abcd syndrome; abcds; 277580 waardenburg syndrome, type 4a; ws4a; 600155 hirschsprung disease, susceptibility to, 2; hscr2;
NP_003982.1	BGIBMGA011934	0.26	87	9e-06	FBpp0300658	600501 abcd syndrome; abcds; 277580 waardenburg syndrome, type 4a; ws4a; 600155 hirschsprung disease, susceptibility to, 2; hscr2;
NP_005996.2	BGIBMGA002273	0.22	756	1e-35	FBpp0291996	600965 deafness, autosomal dominant 6; dfna6; 222300 wolfram syndrome 1; wfs1; 125853 diabetes mellitus, noninsulin-dependent; niddm;
NP_000103.2	BGIBMGA003960	0.22	435	8e-23	FBpp0293017	600972 achondrogenesis, type ib; acg1b; 256050 atelosteogenesis, type ii; aoii; 222600 diastrophic dysplasia; 226900 epiphyseal dysplasia, multiple, 4; edm4;
NP_000103.2	BGIBMGA007037	0.48	50	2e-07	FBpp0304956	600972 achondrogenesis, type ib; acg1b; 256050 atelosteogenesis, type ii; aoii; 222600 diastrophic dysplasia; 226900 epiphyseal dysplasia, multiple, 4; edm4;
NP_000103.2	BGIBMGA007041	0.25	499	3e-33	FBpp0293017	600972 achondrogenesis, type ib; acg1b; 256050 atelosteogenesis, type ii; aoii; 222600 diastrophic dysplasia; 226900 epiphyseal dysplasia, multiple, 4; edm4;
NP_005778.1	BGIBMGA007575	0.7	53	6e-18	FBpp0072004	601110 congenital disorder of glycosylation, type id; cdg1d;
AAD24460.1	BGIBMGA013822	0.32	327	6e-44		601492 mucopolysaccharidosis type ix;
NP_000113.1	BGIBMGA011797	0.69	478	0	FBpp0113091	601675 trichothiodystrophy, photosensitive; ttdp; 610651 xeroderma pigmentosum, complementation group b; xpb;
NP_001171761.1	BGIBMGA001472	0.42	995	0	FBpp0078411	601678 bartter syndrome, antenatal, type 1;
NP_001171761.1	BGIBMGA001473	0.44	307	1e-59	FBpp0078412	601678 bartter syndrome, antenatal, type 1;
EAW77346.1	BGIBMGA012368	0.4	1007	9e-177	FBpp0305976	601678 bartter syndrome, antenatal, type 1;
NP_003273.1	BGIBMGA001031	0.31	103	2e-07	FBpp0074299	601680 arthrogryposis, distal, type 2b; da2b;
NP_006748.1	BGIBMGA013700	0.4	119	2e-14	FBpp0291137	601680 arthrogryposis, distal, type 2b; da2b;
NP_569735.1	BGIBMGA001902	0.27	214	1e-14	FBpp0304916	601776 html::element=hash(0x12718b0);
BAC11172.1	BGIBMGA003101	0.52	89	2e-18	FBpp0309156	601776 html::element=hash(0x12718b0);
NP_569735.1	BGIBMGA009973	0.32	160	7e-15	FBpp0303005	601776 html::element=hash(0x12718b0);
NP_000171.1	BGIBMGA001255	0.32	237	5e-22	FBpp0304773	601777 cone-rod dystrophy 6; cord6; 204000 leber congenital amaurosis 1; lca1;
NP_000171.1	BGIBMGA002064	0.32	183	5e-20	FBpp0298357	601777 cone-rod dystrophy 6; cord6; 204000 leber congenital amaurosis 1; lca1;
NP_000171.1	BGIBMGA002197	0.54	509	1e-151	FBpp0307226	601777 cone-rod dystrophy 6; cord6; 204000 leber congenital amaurosis 1; lca1;
NP_000171.1	BGIBMGA003315	0.35	148	3e-20	FBpp0305813	601777 cone-rod dystrophy 6; cord6; 204000 leber congenital amaurosis 1; lca1;
NP_000171.1	BGIBMGA009302	0.45	201	6e-38	FBpp0085115	601777 cone-rod dystrophy 6; cord6; 204000 leber congenital amaurosis 1; lca1;
NP_000171.1	BGIBMGA009865	0.53	241	8e-57	FBpp0099611	601777 cone-rod dystrophy 6; cord6; 204000 leber congenital amaurosis 1; lca1;
NP_000171.1	BGIBMGA012087	0.3	242	2e-23	FBpp0074666	601777 cone-rod dystrophy 6; cord6; 204000 leber congenital amaurosis 1; lca1;
BAG52685.1	BGIBMGA002346	0.34	223	1e-28	FBpp0082167	601815 phosphoglycerate dehydrogenase deficiency;
AAD51415.1	BGIBMGA012309	0.5	304	4e-87	FBpp0079809	601815 phosphoglycerate dehydrogenase deficiency;
NP_002418.1	BGIBMGA007804	0.42	385	6e-64	FBpp0292977	602111 spondyloepimetaphyseal dysplasia, missouri type;
NP_055577.1	BGIBMGA005735	0.54	493	5e-146		602398 desmosterolosis;
NP_055577.1	BGIBMGA012624	0.4	484	3e-92		602398 desmosterolosis;
NP_055112.2	BGIBMGA008316	0.62	224	1e-79	FBpp0288428	602473 encephalopathy, ethylmalonic; ee;
NP_002426.1	BGIBMGA006473	0.46	413	9e-89	FBpp0081609	602579 congenital disorder of glycosylation, type ib; cdg1b;
NP_003986.2	BGIBMGA002066	0.32	228	1e-19	FBpp0298357	602875 acromesomelic dysplasia, maroteaux type; amdm;
NP_003986.2	BGIBMGA003982	0.55	466	3e-139	FBpp0271905	602875 acromesomelic dysplasia, maroteaux type; amdm;
NP_003986.2	BGIBMGA005542	0.48	85	2e-14	FBpp0293332	602875 acromesomelic dysplasia, maroteaux type; amdm;
NP_003986.2	BGIBMGA006212	0.29	195	1e-11	FBpp0085252	602875 acromesomelic dysplasia, maroteaux type; amdm;
NP_003986.2	BGIBMGA006322	0.35	203	1e-25	FBpp0110263	602875 acromesomelic dysplasia, maroteaux type; amdm;
NP_003986.2	BGIBMGA006555	0.3	212	3e-16	FBpp0305813	602875 acromesomelic dysplasia, maroteaux type; amdm;
NP_003986.2	BGIBMGA006799	0.42	715	2e-153	FBpp0293332	602875 acromesomelic dysplasia, maroteaux type; amdm;
BAA81737.1	BGIBMGA006801	0.29	582	5e-52	FBpp0306011	602875 acromesomelic dysplasia, maroteaux type; amdm;
BAA81737.1	BGIBMGA006891	0.4	831	9e-161	FBpp0306011	602875 acromesomelic dysplasia, maroteaux type; amdm;
NP_003986.2	BGIBMGA009300	0.44	222	4e-44	FBpp0084819	602875 acromesomelic dysplasia, maroteaux type; amdm;
NP_003986.2	BGIBMGA009867	0.57	110	3e-31	FBpp0311979	602875 acromesomelic dysplasia, maroteaux type; amdm;
BAA81737.1	BGIBMGA010092	0.61	474	1e-141	FBpp0311979	602875 acromesomelic dysplasia, maroteaux type; amdm;
NP_003986.2	BGIBMGA010125	0.69	258	4e-95	FBpp0311979	602875 acromesomelic dysplasia, maroteaux type; amdm;
NP_003986.2	BGIBMGA010713	0.47	250	4e-57	FBpp0306946	602875 acromesomelic dysplasia, maroteaux type; amdm;
NP_003986.2	BGIBMGA012086	0.31	194	2e-19	FBpp0293288	602875 acromesomelic dysplasia, maroteaux type; amdm;
NP_055066.1	BGIBMGA002393	0.59	652	0	FBpp0303322	603471 citrullinemia, type ii, adult-onset; ctln2; 605814 citrullinemia, type ii, neonatal-onset;
CAB62206.1	BGIBMGA007487	0.28	225	1e-14	FBpp0297297	603471 citrullinemia, type ii, adult-onset; ctln2; 605814 citrullinemia, type ii, neonatal-onset;
NP_055066.1	BGIBMGA008415	0.33	248	6e-24	FBpp0070129	603471 citrullinemia, type ii, adult-onset; ctln2; 605814 citrullinemia, type ii, neonatal-onset;
BAH11828.1	BGIBMGA009135	0.26	271	1e-10	FBpp0084307	603471 citrullinemia, type ii, adult-onset; ctln2; 605814 citrullinemia, type ii, neonatal-onset;
NP_001029027.1	BGIBMGA001792	0.36	130	2e-21	FBpp0078337	603554 omenn syndrome; 602450 severe combined immunodeficiency with sensitivity to ionizing radiation;
NP_001029027.1	BGIBMGA012879	0.39	76	3e-08	FBpp0078337	603554 omenn syndrome; 602450 severe combined immunodeficiency with sensitivity to ionizing radiation;
NP_430255.2	BGIBMGA004108	0.46	362	2e-68	FBpp0310097	604168 congenital cataracts, facial dysmorphism, and neuropathy;
NP_430255.2	BGIBMGA009640	0.34	94	1e-08	FBpp0305756	604168 congenital cataracts, facial dysmorphism, and neuropathy;
NP_430255.2	BGIBMGA014117	0.27	147	4e-06	FBpp0076921	604168 congenital cataracts, facial dysmorphism, and neuropathy;
EAW82963.1	BGIBMGA010860	0.43	124	1e-08	FBpp0075313	604173 poikiloderma with neutropenia; pn;
NP_940799.1	BGIBMGA001300	0.34	150	2e-17	FBpp0288959	604271 short stature, idiopathic, autosomal;
NP_940799.1	BGIBMGA002244	0.53	51	4e-08	FBpp0308331	604271 short stature, idiopathic, autosomal;
NP_940799.1	BGIBMGA010605	0.39	152	6e-25	FBpp0082242	604271 short stature, idiopathic, autosomal;
NP_663729.1	BGIBMGA003158	0.42	240	4e-44	FBpp0303527	604273 mitochondrial complex v (atp synthase) deficiency, nuclear type 1; mc5dn1;
NP_003750.1	BGIBMGA002073	0.45	140	5e-27	FBpp0076053	604278 renal tubular acidosis, proximal, with ocular abnormalities and mental retardation;
NP_003750.1	BGIBMGA006005	0.54	670	0	FBpp0304053	604278 renal tubular acidosis, proximal, with ocular abnormalities and mental retardation;
NP_002171.2	BGIBMGA005269	0.35	210	3e-16	FBpp0083940	604320 spinal muscular atrophy, distal, autosomal recessive, 1; dsma1;
NP_079413.3	BGIBMGA006780	0.21	823	3e-30	FBpp0309872	604360 spastic paraplegia 11, autosomal recessive; spg11;
NP_036566.1	BGIBMGA002962	0.39	69	3e-10	FBpp0085819	604369 sialuria, finnish type; 269920 infantile sialic acid storage disorder;
NP_036566.1	BGIBMGA004858	0.34	287	8e-45	FBpp0083395	604369 sialuria, finnish type; 269920 infantile sialic acid storage disorder;
NP_036566.1	BGIBMGA005389	0.41	449	2e-98	FBpp0308734	604369 sialuria, finnish type; 269920 infantile sialic acid storage disorder;
NP_036566.1	BGIBMGA007270	0.4	444	4e-92	FBpp0079876	604369 sialuria, finnish type; 269920 infantile sialic acid storage disorder;
NP_036566.1	BGIBMGA007278	0.38	438	2e-83	FBpp0079876	604369 sialuria, finnish type; 269920 infantile sialic acid storage disorder;
NP_036566.1	BGIBMGA007279	0.49	76	8e-08	FBpp0080090	604369 sialuria, finnish type; 269920 infantile sialic acid storage disorder;
NP_036566.1	BGIBMGA007280	0.38	262	1e-48	FBpp0079876	604369 sialuria, finnish type; 269920 infantile sialic acid storage disorder;
NP_036566.1	BGIBMGA007281	0.37	432	2e-81	FBpp0079876	604369 sialuria, finnish type; 269920 infantile sialic acid storage disorder;
NP_036566.1	BGIBMGA007282	0.34	430	1e-59	FBpp0079876	604369 sialuria, finnish type; 269920 infantile sialic acid storage disorder;
NP_036566.1	BGIBMGA007427	0.35	112	2e-20	FBpp0307796	604369 sialuria, finnish type; 269920 infantile sialic acid storage disorder;
NP_036566.1	BGIBMGA007428	0.37	161	7e-28	FBpp0307796	604369 sialuria, finnish type; 269920 infantile sialic acid storage disorder;
NP_036566.1	BGIBMGA007462	0.39	457	3e-86	FBpp0077623	604369 sialuria, finnish type; 269920 infantile sialic acid storage disorder;
NP_036566.1	BGIBMGA008869	0.35	388	2e-66	FBpp0307618	604369 sialuria, finnish type; 269920 infantile sialic acid storage disorder;
NP_036566.1	BGIBMGA008871	0.36	385	7e-61	FBpp0307618	604369 sialuria, finnish type; 269920 infantile sialic acid storage disorder;
NP_036566.1	BGIBMGA008872	0.28	390	6e-47	FBpp0307618	604369 sialuria, finnish type; 269920 infantile sialic acid storage disorder;
NP_036566.1	BGIBMGA010861	0.43	437	2e-101	FBpp0083297	604369 sialuria, finnish type; 269920 infantile sialic acid storage disorder;
NP_036566.1	BGIBMGA014105	0.43	432	7e-99	FBpp0309074	604369 sialuria, finnish type; 269920 infantile sialic acid storage disorder;
BAG38135.1	BGIBMGA014243	0.37	204	2e-30	FBpp0309428	604369 sialuria, finnish type; 269920 infantile sialic acid storage disorder;
NP_036566.1	BGIBMGA014244	0.35	431	7e-69	FBpp0085815	604369 sialuria, finnish type; 269920 infantile sialic acid storage disorder;
NP_036566.1	BGIBMGA014245	0.35	431	3e-69	FBpp0085815	604369 sialuria, finnish type; 269920 infantile sialic acid storage disorder;
NP_036566.1	BGIBMGA014246	0.36	429	7e-59	FBpp0087925	604369 sialuria, finnish type; 269920 infantile sialic acid storage disorder;
NP_036566.1	BGIBMGA014248	0.37	282	5e-40	FBpp0309428	604369 sialuria, finnish type; 269920 infantile sialic acid storage disorder;
NP_036566.1	BGIBMGA014257	0.32	208	3e-30	FBpp0293293	604369 sialuria, finnish type; 269920 infantile sialic acid storage disorder;
NP_036566.1	BGIBMGA014259	0.28	458	1e-52	FBpp0309428	604369 sialuria, finnish type; 269920 infantile sialic acid storage disorder;
NP_861420.1	BGIBMGA002730	0.27	193	3e-11	FBpp0071071	604931 cortisone reductase deficiency 1; cortrd1;
NP_004276.2	BGIBMGA013916	0.3	228	8e-13	FBpp0073235	604931 cortisone reductase deficiency 1; cortrd1;
BAG53800.1	BGIBMGA006166	0.44	165	4e-28	FBpp0305150	605039 bohring-opitz syndrome; bops;
AAD28285.1	BGIBMGA006964	0.28	228	3e-09	FBpp0074708	605479 cholestasis, benign recurrent intrahepatic, 2; bric2; 601847 cholestasis, progressive familial intrahepatic, 2; pfic2;
NP_065706.2	BGIBMGA002969	0.48	200	6e-40	FBpp0293020	606438 huntington disease-like 2; hdl2;
NP_065706.2	BGIBMGA005215	0.32	139	7e-13	FBpp0080018	606438 huntington disease-like 2; hdl2;
NP_065706.2	BGIBMGA006723	0.36	107	2e-12	FBpp0072352	606438 huntington disease-like 2; hdl2;
NP_000134.2	BGIBMGA008214	0.63	420	3e-136	FBpp0070916	606812 fumarase deficiency; 150800 hereditary leiomyomatosis and renal cell cancer; hlrcc;
NP_000134.2	BGIBMGA008216	0.77	44	2e-14	FBpp0070915	606812 fumarase deficiency; 150800 hereditary leiomyomatosis and renal cell cancer; hlrcc;
NP_000334.1	BGIBMGA013465	0.25	199	9e-07	FBpp0083084	606824 glucose/galactose malabsorption; ggm;
NP_203520.1	BGIBMGA006131	0.31	286	9e-23	FBpp0084848	607271 caspase 8 deficiency; 114550 hepatocellular carcinoma; 114480 breast cancer; 211980 lung cancer;
NP_001092.1	BGIBMGA001921	0.36	369	3e-67	FBpp0306212	607371 dystonia, juvenile-onset;
AAH16045.1	BGIBMGA002082	0.43	375	6e-87	FBpp0082597	607371 dystonia, juvenile-onset;
CAA45026.1	BGIBMGA002083	0.36	367	3e-63	FBpp0071448	607371 dystonia, juvenile-onset;
AAH16045.1	BGIBMGA009805	0.31	372	1e-36	FBpp0086115	607371 dystonia, juvenile-onset;
NP_001092.1	BGIBMGA009821	0.89	374	0	FBpp0082597	607371 dystonia, juvenile-onset;
NP_001092.1	BGIBMGA013945	0.97	374	0	FBpp0071448	607371 dystonia, juvenile-onset;
NP_003375.1	BGIBMGA000118	0.42	167	2e-30	FBpp0305277	607596 pontocerebellar hypoplasia, type 1a; pch1a;
NP_003375.1	BGIBMGA008842	0.42	336	9e-71	FBpp0084466	607596 pontocerebellar hypoplasia, type 1a; pch1a;
EAW99687.1	BGIBMGA003806	0.36	1007	1e-111	FBpp0075498	607641 neuronopathy, distal hereditary motor, type viib; hmn7b; 168605 perry syndrome; 105400 amyotrophic lateral sclerosis 1; als1;
NP_004073.2	BGIBMGA010993	0.46	68	7e-10	FBpp0085690	607641 neuronopathy, distal hereditary motor, type viib; hmn7b; 168605 perry syndrome; 105400 amyotrophic lateral sclerosis 1; als1;
BAG59757.1	BGIBMGA012199	0.23	268	1e-06	FBpp0289285	607641 neuronopathy, distal hereditary motor, type viib; hmn7b; 168605 perry syndrome; 105400 amyotrophic lateral sclerosis 1; als1;
NP_031399.2	BGIBMGA000130	0.31	214	2e-16	FBpp0311597	607721 noonan syndrome-like disorder with loose anagen hair; nslh;
NP_031399.2	BGIBMGA001436	0.29	125	2e-10	FBpp0304061	607721 noonan syndrome-like disorder with loose anagen hair; nslh;
BAA74885.2	BGIBMGA005373	0.3	436	5e-45	FBpp0077892	607721 noonan syndrome-like disorder with loose anagen hair; nslh;
NP_031399.2	BGIBMGA005655	0.27	298	9e-17	FBpp0308615	607721 noonan syndrome-like disorder with loose anagen hair; nslh;
NP_031399.2	BGIBMGA006403	0.66	496	0	FBpp0308615	607721 noonan syndrome-like disorder with loose anagen hair; nslh;
BAF85522.1	BGIBMGA006516	0.39	189	3e-29	FBpp0300857	607721 noonan syndrome-like disorder with loose anagen hair; nslh;
NP_031399.2	BGIBMGA007683	0.29	143	3e-09	FBpp0304137	607721 noonan syndrome-like disorder with loose anagen hair; nslh;
BAA74885.2	BGIBMGA007706	0.32	184	5e-21	FBpp0070997	607721 noonan syndrome-like disorder with loose anagen hair; nslh;
NP_031399.2	BGIBMGA007715	0.32	168	7e-11	FBpp0309578	607721 noonan syndrome-like disorder with loose anagen hair; nslh;
NP_031399.2	BGIBMGA008504	0.32	234	6e-21	FBpp0307841	607721 noonan syndrome-like disorder with loose anagen hair; nslh;
NP_031399.2	BGIBMGA010322	0.29	456	2e-39	FBpp0082312	607721 noonan syndrome-like disorder with loose anagen hair; nslh;
NP_031399.2	BGIBMGA013072	0.31	168	2e-18	FBpp0084021	607721 noonan syndrome-like disorder with loose anagen hair; nslh;
BAG52235.1	BGIBMGA014544	0.41	61	3e-08	FBpp0308842	607721 noonan syndrome-like disorder with loose anagen hair; nslh;
NP_002172.2	BGIBMGA012535	0.48	278	2e-66	FBpp0099945	607778 acrocapitofemoral dysplasia; acfd; 112500 brachydactyly, type a1; bda1;
CAA65774.1	BGIBMGA004852	0.74	714	0	FBpp0308424	607812 craniolenticulosutural dysplasia; clsd;
NP_001165282.1	BGIBMGA013129	0.44	403	2e-98	FBpp0306807	608013 gaucher disease, perinatal lethal; 230800 gaucher disease, type i; 230900 gaucher disease, type ii; 231000 gaucher disease, type iii; 231005 gaucher disease, type iiic;
NP_001165282.1	BGIBMGA013130	0.42	400	1e-83	FBpp0306807	608013 gaucher disease, perinatal lethal; 230800 gaucher disease, type i; 230900 gaucher disease, type ii; 231000 gaucher disease, type iii; 231005 gaucher disease, type iiic;
NP_597725.1	BGIBMGA002847	0.32	128	3e-08	FBpp0288685	608022 diaphanospondylodysostosis;
NP_597725.1	BGIBMGA005348	0.26	163	2e-10	FBpp0304148	608022 diaphanospondylodysostosis;
NP_597725.1	BGIBMGA006913	0.34	524	9e-86	FBpp0071536	608022 diaphanospondylodysostosis;
NP_060921.3	BGIBMGA014521	0.49	171	2e-42	FBpp0081088	608393 microcephaly 6, primary, autosomal recessive; mcph6; 613676 seckel syndrome 4; sckl4;
AAH31095.1	BGIBMGA011976	0.45	425	2e-102	FBpp0082947	608540 congenital disorder of glycosylation, type ik; cdg1k;
AAB64299.1	BGIBMGA007838	0.44	186	1e-32	FBpp0305378	608594 lipodystrophy, congenital generalized, type 1; cgl1;
AAB64299.1	BGIBMGA007839	0.45	149	2e-30	FBpp0305378	608594 lipodystrophy, congenital generalized, type 1; cgl1;
AAB64299.1	BGIBMGA007880	0.4	156	3e-28	FBpp0305378	608594 lipodystrophy, congenital generalized, type 1; cgl1;
NP_005848.2	BGIBMGA011087	0.43	456	2e-101	FBpp0086207	608612 mandibuloacral dysplasia with type b lipodystrophy; madb; 275210 restrictive dermopathy, lethal;
NP_060606.3	BGIBMGA005594	0.29	503	4e-58	FBpp0084071	608716 microcephaly 5, primary, autosomal recessive; mcph5;
NP_003850.1	BGIBMGA001115	0.27	202	6e-13	FBpp0079234	608799 congenital disorder of glycosylation, type ie; cdg1e;
NP_003850.1	BGIBMGA004218	0.77	238	6e-108	FBpp0080817	608799 congenital disorder of glycosylation, type ie; cdg1e;
NP_000174.1	BGIBMGA014181	0.67	442	3e-166	FBpp0072135	609015 trifunctional protein deficiency;
BAG37516.1	BGIBMGA000765	0.3	686	6e-75	FBpp0083663	609060 combined oxidative phosphorylation deficiency 1; coxpd1;
AAK58877.1	BGIBMGA001522	0.23	218	6e-10	FBpp0075148	609060 combined oxidative phosphorylation deficiency 1; coxpd1;
NP_079272.4	BGIBMGA004165	0.25	422	3e-23	FBpp0305182	609060 combined oxidative phosphorylation deficiency 1; coxpd1;
NP_079272.4	BGIBMGA004774	0.3	138	8e-08	FBpp0084662	609060 combined oxidative phosphorylation deficiency 1; coxpd1;
AAK58877.1	BGIBMGA006144	0.67	568	0	FBpp0079041	609060 combined oxidative phosphorylation deficiency 1; coxpd1;
NP_079272.4	BGIBMGA007954	0.33	134	3e-13	FBpp0084626	609060 combined oxidative phosphorylation deficiency 1; coxpd1;
CAF02096.2	BGIBMGA000601	0.57	421	4e-135	FBpp0289826	609192 loeys-dietz syndrome, type 1a; lds1a; 608967 loeys-dietz syndrome, type 2a; lds2a; 132800 multiple self-healing squamous epithelioma, susceptibility to; msse;
EAW78940.1	BGIBMGA000703	0.45	417	3e-98	FBpp0075918	609220 bruck syndrome 2; brks2;
NP_004773.1	BGIBMGA012985	0.31	225	2e-26	FBpp0072145	609528 cerebral dysgenesis, neuropathy, ichthyosis, and palmoplantar keratoderma syndrome;
NP_060599.1	BGIBMGA005391	0.5	234	2e-63	FBpp0081244	610090 pyridoxamine 5-prime-phosphate oxidase deficiency;
NP_060599.1	BGIBMGA012934	0.48	171	1e-42	FBpp0078831	610090 pyridoxamine 5-prime-phosphate oxidase deficiency;
NP_660304.1	BGIBMGA003391	0.66	110	2e-36	FBpp0288463	610198 3-methylglutaconic aciduria, type v; mgca5;
NP_079033.4	BGIBMGA001083	0.39	169	8e-21	FBpp0305754	610253 kleefstra syndrome;
NP_079033.4	BGIBMGA007557	0.33	178	8e-18	FBpp0112128	610253 kleefstra syndrome;
NP_079033.4	BGIBMGA009571	0.33	181	1e-17	FBpp0311438	610253 kleefstra syndrome;
NP_079033.4	BGIBMGA011407	0.36	167	4e-25	FBpp0111689	610253 kleefstra syndrome;
NP_079033.4	BGIBMGA011500	0.42	162	5e-32	FBpp0307983	610253 kleefstra syndrome;
NP_006388.2	BGIBMGA011480	0.44	249	8e-52	FBpp0077750	610333 aicardi-goutieres syndrome 4; ags4;
NP_066279.2	BGIBMGA004680	0.55	103	6e-22	FBpp0074978	610370 diarrhea 4, malabsorptive, congenital; diar4;
AAI14432.1	BGIBMGA000060	0.41	605	3e-141	FBpp0303081	610475 pigmented nodular adrenocortical disease, primary, 2; ppnad2;
NP_058649.3	BGIBMGA002043	0.36	559	1e-96	FBpp0292262	610475 pigmented nodular adrenocortical disease, primary, 2; ppnad2;
NP_058649.3	BGIBMGA008850	0.49	53	4e-07	FBpp0292262	610475 pigmented nodular adrenocortical disease, primary, 2; ppnad2;
ADV69111.1	BGIBMGA008851	0.51	353	1e-104	FBpp0310381	610475 pigmented nodular adrenocortical disease, primary, 2; ppnad2;
ADV69111.1	BGIBMGA010521	0.29	487	1e-54	FBpp0292262	610475 pigmented nodular adrenocortical disease, primary, 2; ppnad2;
NP_058649.3	BGIBMGA011291	0.3	319	3e-36	FBpp0311378	610475 pigmented nodular adrenocortical disease, primary, 2; ppnad2;
NP_057149.1	BGIBMGA013765	0.48	118	9e-27	FBpp0302049	610498 combined oxidative phosphorylation deficiency 2; coxpd2;
NP_005717.3	BGIBMGA002348	0.39	158	6e-21	FBpp0080547	610505 combined oxidative phosphorylation deficiency 3; coxpd3;
NP_065109.1	BGIBMGA001056	0.51	248	3e-69	FBpp0289427	610717 neutral lipid storage disease with myopathy; nlsdm;
NP_001974.1	BGIBMGA002482	0.54	212	8e-67	FBpp0086578	610758 cerebrooculofacioskeletal syndrome 4; cofs4;
BAB20376.1	BGIBMGA004445	0.35	252	3e-32	FBpp0087875	610765 ichthyosis with hypotrichosis, autosomal recessive;
BAB20376.1	BGIBMGA005008	0.3	250	1e-21	FBpp0290158	610765 ichthyosis with hypotrichosis, autosomal recessive;
BAB20376.1	BGIBMGA006423	0.27	223	2e-12	FBpp0077252	610765 ichthyosis with hypotrichosis, autosomal recessive;
NP_068813.1	BGIBMGA008278	0.25	260	3e-16	FBpp0112313	610765 ichthyosis with hypotrichosis, autosomal recessive;
NP_068813.1	BGIBMGA009743	0.37	252	6e-40	FBpp0271893	610765 ichthyosis with hypotrichosis, autosomal recessive;
BAB20376.1	BGIBMGA009750	0.4	262	5e-50	FBpp0300317	610765 ichthyosis with hypotrichosis, autosomal recessive;
NP_068813.1	BGIBMGA012786	0.31	152	4e-11	FBpp0076774	610765 ichthyosis with hypotrichosis, autosomal recessive;
NP_068813.1	BGIBMGA014404	0.31	275	3e-27	FBpp0311172	610765 ichthyosis with hypotrichosis, autosomal recessive;
NP_055723.1	BGIBMGA001578	0.31	238	5e-20	FBpp0086267	610768 congenital disorder of glycosylation, type im; cdg1m;
NP_054736.1	BGIBMGA007266	0.69	125	1e-46	FBpp0289083	610798 immunodeficiency due to defect in mapbp-interacting protein;
AAI51841.1	BGIBMGA004187	0.4	384	6e-79	FBpp0304765	610921 surfactant metabolism dysfunction, pulmonary, 3; smdp3;
NP_001080.2	BGIBMGA004188	0.53	89	3e-20	FBpp0300324	610921 surfactant metabolism dysfunction, pulmonary, 3; smdp3;
AAI51841.1	BGIBMGA007217	0.36	709	1e-124	FBpp0297618	610921 surfactant metabolism dysfunction, pulmonary, 3; smdp3;
AAI51841.1	BGIBMGA007218	0.43	415	3e-93	FBpp0304765	610921 surfactant metabolism dysfunction, pulmonary, 3; smdp3;
NP_001080.2	BGIBMGA007221	0.39	808	1e-127	FBpp0297618	610921 surfactant metabolism dysfunction, pulmonary, 3; smdp3;
AAI51841.1	BGIBMGA007308	0.42	183	4e-26	FBpp0304765	610921 surfactant metabolism dysfunction, pulmonary, 3; smdp3;
NP_001080.2	BGIBMGA010726	0.33	213	2e-24	FBpp0311936	610921 surfactant metabolism dysfunction, pulmonary, 3; smdp3;
NP_001080.2	BGIBMGA010760	0.35	80	8e-07	FBpp0307763	610921 surfactant metabolism dysfunction, pulmonary, 3; smdp3;
NP_001080.2	BGIBMGA010825	0.37	170	2e-22	FBpp0307763	610921 surfactant metabolism dysfunction, pulmonary, 3; smdp3;
NP_001080.2	BGIBMGA012789	0.35	810	3e-114	FBpp0304765	610921 surfactant metabolism dysfunction, pulmonary, 3; smdp3;
NP_064716.2	BGIBMGA000851	0.33	370	1e-59	FBpp0305960	611523 pontocerebellar hypoplasia, type 6; pch6;
NP_064716.2	BGIBMGA008930	0.29	535	3e-50	FBpp0073965	611523 pontocerebellar hypoplasia, type 6; pch6;
NP_064576.1	BGIBMGA006722	0.35	283	8e-43	FBpp0084616	611719 combined oxidative phosphorylation deficiency 5; coxpd5;
NP_908932.1	BGIBMGA012827	0.59	337	5e-98	FBpp0297612	611881 glycogen storage disease xii; gsd12;
NP_908932.1	BGIBMGA013021	0.69	362	4e-138	FBpp0308680	611881 glycogen storage disease xii; gsd12;
CAE45708.1	BGIBMGA007783	0.61	380	5e-129	FBpp0291001	612073 html::element=hash(0x1c14b48);
BAA91939.1	BGIBMGA007824	0.47	377	3e-93	FBpp0311088	612073 html::element=hash(0x1c14b48);
NP_056528.2	BGIBMGA013510	0.76	336	3e-140	FBpp0087152	612075 mitochondrial dna depletion syndrome 8a (encephalomyopathic type with renal tubulopathy); mtdps8a; 613077 progressive external ophthalmoplegia with mitochondrial dna deletions, autosomal dominant, 5; peoa5;
NP_958786.1	BGIBMGA001247	0.23	475	5e-09	FBpp0309608	612138 epidermolysis bullosa simplex with pyloric atresia; 131950 epidermolysis bullosa simplex, ogna type; 226670 epidermolysis bullosa simplex with muscular dystrophy; 613723 muscular dystrophy, limb-girdle, type 2q; lgmd2q;
NP_958786.1	BGIBMGA004409	0.8	85	2e-35	FBpp0293390	612138 epidermolysis bullosa simplex with pyloric atresia; 131950 epidermolysis bullosa simplex, ogna type; 226670 epidermolysis bullosa simplex with muscular dystrophy; 613723 muscular dystrophy, limb-girdle, type 2q; lgmd2q;
NP_958786.1	BGIBMGA004411	0.31	123	4e-12	FBpp0293393	612138 epidermolysis bullosa simplex with pyloric atresia; 131950 epidermolysis bullosa simplex, ogna type; 226670 epidermolysis bullosa simplex with muscular dystrophy; 613723 muscular dystrophy, limb-girdle, type 2q; lgmd2q;
NP_958786.1	BGIBMGA004412	0.34	315	3e-37	FBpp0293393	612138 epidermolysis bullosa simplex with pyloric atresia; 131950 epidermolysis bullosa simplex, ogna type; 226670 epidermolysis bullosa simplex with muscular dystrophy; 613723 muscular dystrophy, limb-girdle, type 2q; lgmd2q;
CAA91196.1	BGIBMGA004414	0.21	1328	3e-19	FBpp0086747	612138 epidermolysis bullosa simplex with pyloric atresia; 131950 epidermolysis bullosa simplex, ogna type; 226670 epidermolysis bullosa simplex with muscular dystrophy; 613723 muscular dystrophy, limb-girdle, type 2q; lgmd2q;
NP_958780.1	BGIBMGA004608	0.26	240	1e-10	FBpp0074217	612138 epidermolysis bullosa simplex with pyloric atresia; 131950 epidermolysis bullosa simplex, ogna type; 226670 epidermolysis bullosa simplex with muscular dystrophy; 613723 muscular dystrophy, limb-girdle, type 2q; lgmd2q;
NP_958786.1	BGIBMGA009558	0.25	306	2e-07	FBpp0288458	612138 epidermolysis bullosa simplex with pyloric atresia; 131950 epidermolysis bullosa simplex, ogna type; 226670 epidermolysis bullosa simplex with muscular dystrophy; 613723 muscular dystrophy, limb-girdle, type 2q; lgmd2q;
CAA65765.1	BGIBMGA009944	0.28	197	8e-09	FBpp0308499	612138 epidermolysis bullosa simplex with pyloric atresia; 131950 epidermolysis bullosa simplex, ogna type; 226670 epidermolysis bullosa simplex with muscular dystrophy; 613723 muscular dystrophy, limb-girdle, type 2q; lgmd2q;
CAA65765.1	BGIBMGA011331	0.22	301	2e-11	FBpp0302975	612138 epidermolysis bullosa simplex with pyloric atresia; 131950 epidermolysis bullosa simplex, ogna type; 226670 epidermolysis bullosa simplex with muscular dystrophy; 613723 muscular dystrophy, limb-girdle, type 2q; lgmd2q;
NP_001121697.1	BGIBMGA002345	0.55	169	2e-39	FBpp0292153	612350 spondylocheirodysplasia, ehlers-danlos syndrome-like;
NP_689477.2	BGIBMGA002971	0.47	149	8e-32	FBpp0080687	612350 spondylocheirodysplasia, ehlers-danlos syndrome-like;
NP_001075.1	BGIBMGA000704	0.58	251	6e-90	FBpp0075918	612394 bone fragility with contractures, arterial rupture, and deafness;
NP_005997.2	BGIBMGA001602	0.28	158	6e-14	FBpp0070113	612447 skeletal defects, genital hypoplasia, and mental retardation;
NP_005997.2	BGIBMGA001775	0.25	198	3e-08	FBpp0112097	612447 skeletal defects, genital hypoplasia, and mental retardation;
CAA79489.1	BGIBMGA001804	0.32	158	4e-18	FBpp0082061	612447 skeletal defects, genital hypoplasia, and mental retardation;
NP_005997.2	BGIBMGA004431	0.28	212	1e-20	FBpp0079702	612447 skeletal defects, genital hypoplasia, and mental retardation;
NP_005997.2	BGIBMGA008173	0.25	107	2e-09	FBpp0080387	612447 skeletal defects, genital hypoplasia, and mental retardation;
CAA79489.1	BGIBMGA008751	0.27	219	2e-19	FBpp0310714	612447 skeletal defects, genital hypoplasia, and mental retardation;
CAA79489.1	BGIBMGA008782	0.26	250	8e-29	FBpp0079702	612447 skeletal defects, genital hypoplasia, and mental retardation;
NP_005997.2	BGIBMGA011989	0.3	106	3e-09	FBpp0083307	612447 skeletal defects, genital hypoplasia, and mental retardation;
CAA79489.1	BGIBMGA013621	0.3	223	2e-27	FBpp0072448	612447 skeletal defects, genital hypoplasia, and mental retardation;
NP_778203.1	BGIBMGA002413	0.33	606	3e-91	FBpp0078557	612540 myopathy, congenital, compton-north;
NP_778203.1	BGIBMGA005747	0.23	870	1e-43	FBpp0303245	612540 myopathy, congenital, compton-north;
NP_778203.1	BGIBMGA008686	0.29	199	1e-10	FBpp0110104	612540 myopathy, congenital, compton-north;
NP_778203.1	BGIBMGA012049	0.31	134	9e-10	FBpp0297092	612540 myopathy, congenital, compton-north;
NP_778203.1	BGIBMGA013795	0.25	802	8e-44	FBpp0303245	612540 myopathy, congenital, compton-north;
NP_115998.2	BGIBMGA013666	0.41	125	1e-23	FBpp0304538	612714 exocrine pancreatic insufficiency, dyserythropoietic anemia, and calvarial hyperostosis;
NP_115998.2	BGIBMGA013680	0.47	125	2e-27	FBpp0304538	612714 exocrine pancreatic insufficiency, dyserythropoietic anemia, and calvarial hyperostosis;
NP_003115.1	BGIBMGA009104	0.36	255	7e-38	FBpp0071184	612716 dystonia, dopa-responsive, due to sepiapterin reductase deficiency;
BAF83179.1	BGIBMGA007949	0.57	277	1e-80	FBpp0305549	612740 porphyria, acute hepatic;
NP_116179.2	BGIBMGA006616	0.55	197	6e-41	FBpp0307679	612782 html::element=hash(0x1af7c38);
NP_116179.2	BGIBMGA012991	0.43	210	7e-43	FBpp0307680	612782 html::element=hash(0x1af7c38);
AAD38423.1	BGIBMGA000234	0.55	342	2e-110	FBpp0304457	612847 brachyolmia type 4 with mild epiphyseal and metaphyseal changes;
NP_004661.2	BGIBMGA000235	0.71	255	4e-109	FBpp0304457	612847 brachyolmia type 4 with mild epiphyseal and metaphyseal changes;
BAG60002.1	BGIBMGA005727	0.44	268	9e-50	FBpp0082895	612940 cutis laxa, autosomal recessive, type iib; arcl2b;
NP_722546.1	BGIBMGA006364	0.42	172	1e-33	FBpp0083127	612940 cutis laxa, autosomal recessive, type iib; arcl2b;
NP_001153048.1	BGIBMGA013697	0.23	269	1e-09	FBpp0086262	613021 bronchiectasis with or without elevated sweat chloride 2; besc2; 264350 pseudohypoaldosteronism, type i, autosomal recessive; pha1b;
NP_001165903.1	BGIBMGA007823	0.34	285	1e-41	FBpp0110579	613027 glycogen storage disease ixc; gsd9c;
NP_001165903.1	BGIBMGA007979	0.46	53	1e-06	FBpp0310032	613027 glycogen storage disease ixc; gsd9c;
NP_001165903.1	BGIBMGA010006	0.33	184	3e-17	FBpp0290642	613027 glycogen storage disease ixc; gsd9c;
NP_001165903.1	BGIBMGA011393	0.39	171	1e-28	FBpp0306196	613027 glycogen storage disease ixc; gsd9c;
NP_001165903.1	BGIBMGA013139	0.36	249	5e-31	FBpp0089374	613027 glycogen storage disease ixc; gsd9c;
NP_000285.1	BGIBMGA013171	0.5	371	4e-103	FBpp0310241	613027 glycogen storage disease ixc; gsd9c;
NP_061866.1	BGIBMGA008358	0.28	319	1e-18	FBpp0307844	613075 macrocephaly, alopecia, cutis laxa, and scoliosis;
NP_001368.2	BGIBMGA000909	0.27	1219	4e-131	FBpp0271926	613091 asphyxiating thoracic dystrophy 3; atd3; 263520 short rib-polydactyly syndrome, type iia; 263510 short rib-polydactyly syndrome, type iii;
NP_001368.2	BGIBMGA000911	0.38	540	2e-81	FBpp0271926	613091 asphyxiating thoracic dystrophy 3; atd3; 263520 short rib-polydactyly syndrome, type iia; 263510 short rib-polydactyly syndrome, type iii;
NP_001368.2	BGIBMGA000912	0.52	163	5e-43	FBpp0271926	613091 asphyxiating thoracic dystrophy 3; atd3; 263520 short rib-polydactyly syndrome, type iia; 263510 short rib-polydactyly syndrome, type iii;
NP_001073932.1	BGIBMGA000913	0.26	1274	6e-88	FBpp0271926	613091 asphyxiating thoracic dystrophy 3; atd3; 263520 short rib-polydactyly syndrome, type iia; 263510 short rib-polydactyly syndrome, type iii;
NP_001368.2	BGIBMGA001546	0.3	2049	0	FBpp0073215	613091 asphyxiating thoracic dystrophy 3; atd3; 263520 short rib-polydactyly syndrome, type iia; 263510 short rib-polydactyly syndrome, type iii;
CAD98012.1	BGIBMGA001547	0.26	1292	3e-136	FBpp0304991	613091 asphyxiating thoracic dystrophy 3; atd3; 263520 short rib-polydactyly syndrome, type iia; 263510 short rib-polydactyly syndrome, type iii;
AAB09728.1	BGIBMGA010474	0.47	72	6e-14	FBpp0312296	613091 asphyxiating thoracic dystrophy 3; atd3; 263520 short rib-polydactyly syndrome, type iia; 263510 short rib-polydactyly syndrome, type iii;
NP_598397.1	BGIBMGA004930	0.24	234	4e-07	FBpp0112197	613154 muscular dystrophy-dystroglycanopathy (congenital with brain and eye anomalies), type a, 6; mddga6; 608840 muscular dystrophy-dystroglycanopathy (congenital with mental retardation), type b, 6; mddgb6;
BAA25535.3	BGIBMGA009403	0.44	338	5e-81	FBpp0112197	613154 muscular dystrophy-dystroglycanopathy (congenital with brain and eye anomalies), type a, 6; mddga6; 608840 muscular dystrophy-dystroglycanopathy (congenital with mental retardation), type b, 6; mddgb6;
NP_598397.1	BGIBMGA013719	0.23	253	1e-16	FBpp0293957	613154 muscular dystrophy-dystroglycanopathy (congenital with brain and eye anomalies), type a, 6; mddga6; 608840 muscular dystrophy-dystroglycanopathy (congenital with mental retardation), type b, 6; mddgb6;
NP_065737.2	BGIBMGA006823	0.52	462	3e-146	FBpp0310512	613163 gaba-transaminase deficiency;
CAA25320.1	BGIBMGA011774	0.53	285	2e-86	FBpp0072834	613179 purine nucleoside phosphorylase deficiency;
BAC05327.1	BGIBMGA013895	0.28	180	2e-07	FBpp0311789	613179 purine nucleoside phosphorylase deficiency;
NP_113654.4	BGIBMGA008989	0.34	1002	2e-147	FBpp0080933	613192 mental retardation, autosomal recessive 13; mrt13;
NP_620688.2	BGIBMGA002645	0.27	468	3e-28	FBpp0301591	613195 weill-marchesani-like syndrome;
NP_620688.2	BGIBMGA004365	0.28	202	5e-16	FBpp0288559	613195 weill-marchesani-like syndrome;
NP_620688.2	BGIBMGA013968	0.28	187	2e-25	FBpp0298832	613195 weill-marchesani-like syndrome;
NP_000443.1	BGIBMGA010699	0.29	211	1e-12	FBpp0073848	613291 bile acid malabsorption, primary; pbam;
NP_113671.3	BGIBMGA003648	0.29	353	9e-40	FBpp0072169	613385 autoimmune disease, syndromic multisystem;
NP_113671.3	BGIBMGA003682	0.52	46	3e-09	FBpp0288697	613385 autoimmune disease, syndromic multisystem;
NP_113671.3	BGIBMGA005933	0.49	862	0	FBpp0308612	613385 autoimmune disease, syndromic multisystem;
NP_113671.3	BGIBMGA006621	0.33	351	2e-48	FBpp0306037	613385 autoimmune disease, syndromic multisystem;
NP_113671.3	BGIBMGA006636	0.46	66	2e-09	FBpp0292727	613385 autoimmune disease, syndromic multisystem;
NP_113671.3	BGIBMGA006637	0.44	378	2e-73	FBpp0292727	613385 autoimmune disease, syndromic multisystem;
NP_113671.3	BGIBMGA007076	0.43	464	3e-107	FBpp0305371	613385 autoimmune disease, syndromic multisystem;
NP_113671.3	BGIBMGA012636	0.48	461	6e-127	FBpp0304228	613385 autoimmune disease, syndromic multisystem;
NP_085911.2	BGIBMGA008087	0.35	855	9e-143	FBpp0070235	613398 warsaw breakage syndrome; wabs;
NP_001180245.1	BGIBMGA010731	0.28	188	1e-12	FBpp0084899	613404 arthrogryposis, renal dysfunction, and cholestasis 2; arcs2;
NP_005240.3	BGIBMGA010297	0.83	119	3e-53	FBpp0077189	613454 rett syndrome, congenital variant;
CAA52239.1	BGIBMGA010490	0.82	118	6e-51	FBpp0077189	613454 rett syndrome, congenital variant;
NP_005240.3	BGIBMGA014268	0.59	83	1e-24	FBpp0077188	613454 rett syndrome, congenital variant;
AAI28146.1	BGIBMGA006072	0.3	215	2e-22	FBpp0079628	613489 congenital disorder of glycosylation, type iij; cdg2j;
NP_689482.1	BGIBMGA006615	0.45	118	9e-23	FBpp0309036	613559 combined oxidative phosphorylation deficiency 7; coxpd7;
NP_001035526.1	BGIBMGA014443	0.46	428	2e-110	FBpp0072334	613561 myopathy, lactic acidosis, and sideroblastic anemia 2; mlasa2;
NP_004259.3	BGIBMGA005197	0.42	642	5e-136	FBpp0082980	613668 microcephaly, postnatal progressive, with seizures and brain atrophy;
NP_115969.2	BGIBMGA005390	0.35	99	5e-07	FBpp0099504	613686 spondylocostal dysostosis 4, autosomal recessive; scdo4;
NP_115969.2	BGIBMGA008915	0.29	165	2e-10	FBpp0084355	613686 spondylocostal dysostosis 4, autosomal recessive; scdo4;
NP_001159439.1	BGIBMGA008965	0.46	50	1e-06	FBpp0084355	613686 spondylocostal dysostosis 4, autosomal recessive; scdo4;
AAI26309.1	BGIBMGA002914	0.28	563	8e-59	FBpp0305942	613744 spastic paraplegia 51, autosomal recessive; spg51;
AAI26309.1	BGIBMGA005466	0.24	528	6e-42	FBpp0088490	613744 spastic paraplegia 51, autosomal recessive; spg51;
AAI26309.1	BGIBMGA007745	0.26	420	3e-36	FBpp0073673	613744 spastic paraplegia 51, autosomal recessive; spg51;
AAA51681.1	BGIBMGA009808	0.49	427	5e-117	FBpp0072886	613752 hypermethioninemia with s-adenosylhomocysteine hydrolase deficiency;
NP_001155238.1	BGIBMGA011168	0.78	359	3e-164	FBpp0312000	613752 hypermethioninemia with s-adenosylhomocysteine hydrolase deficiency;
NP_005912.1	BGIBMGA010545	0.38	258	2e-41	FBpp0289484	613762 46,xy sex reversal 6; srxy6;
NP_005912.1	BGIBMGA013442	0.29	139	4e-13	FBpp0303771	613762 46,xy sex reversal 6; srxy6;
NP_005912.1	BGIBMGA013443	0.35	90	6e-09	FBpp0303771	613762 46,xy sex reversal 6; srxy6;
NP_859526.1	BGIBMGA009708	0.32	316	4e-50	FBpp0072330	613800 meier-gorlin syndrome 2; mgors2;
NP_055136.1	BGIBMGA004270	0.3	240	2e-14	FBpp0087566	613803 meier-gorlin syndrome 3; mgors3;
AAH21126.1	BGIBMGA011818	0.35	369	8e-58	FBpp0309018	613804 meier-gorlin syndrome 4; mgors4;
NP_001245.1	BGIBMGA006195	0.39	361	2e-59	FBpp0076371	613805 meier-gorlin syndrome 5; mgors5;
NP_000782.1	BGIBMGA013340	0.41	181	1e-33	FBpp0110210	613839 megaloblastic anemia due to dihydrofolate reductase deficiency;
NP_060297.1	BGIBMGA003977	0.32	314	1e-41	FBpp0307454	613845 hyperuricemia, pulmonary hypertension, renal failure, and alkalosis;
NP_060297.1	BGIBMGA005414	0.36	252	8e-44	FBpp0306656	613845 hyperuricemia, pulmonary hypertension, renal failure, and alkalosis;
NP_690599.1	BGIBMGA006942	0.7	109	2e-43	FBpp0303753	613849 osteogenesis imperfecta, type xii; oi12;
NP_690599.1	BGIBMGA006943	0.41	358	2e-57	FBpp0301973	613849 osteogenesis imperfecta, type xii; oi12;
NP_942136.1	BGIBMGA011222	0.62	1049	0	FBpp0308270	613933 acetyl-coa carboxylase deficiency; acacad;
NP_942136.1	BGIBMGA011223	0.49	1174	0	FBpp0308270	613933 acetyl-coa carboxylase deficiency; acacad;
NP_060308.1	BGIBMGA000029	0.42	153	1e-23	FBpp0305289	613987 dyskeratosis congenita, autosomal recessive, 2; dkcb2;
NP_060308.1	BGIBMGA007661	0.29	89	5e-07	FBpp0311460	613987 dyskeratosis congenita, autosomal recessive, 2; dkcb2;
NP_060308.1	BGIBMGA011920	0.36	118	2e-19	FBpp0077676	613987 dyskeratosis congenita, autosomal recessive, 2; dkcb2;
NP_003851.1	BGIBMGA010668	0.76	88	3e-37	FBpp0305308	614008 nestor-guillermo progeria syndrome; ngps;
EAW53933.1	BGIBMGA007247	0.42	254	6e-45	FBpp0112072	614019 lissencephaly 4; lis4;
NP_060336.3	BGIBMGA000177	0.37	163	2e-23	FBpp0076533	614052 mitochondrial complex v (atp synthase) deficiency, nuclear type 2; mc5dn2;
NP_055612.2	BGIBMGA001743	0.33	195	2e-23	FBpp0305244	614069 immunodeficiency-centromeric instability-facial anomalies syndrome 2; icf2;
NP_055612.2	BGIBMGA002026	0.28	115	3e-08	FBpp0304406	614069 immunodeficiency-centromeric instability-facial anomalies syndrome 2; icf2;
NP_055612.2	BGIBMGA003094	0.37	74	4e-06	FBpp0292934	614069 immunodeficiency-centromeric instability-facial anomalies syndrome 2; icf2;
NP_055612.2	BGIBMGA003834	0.3	159	6e-17	FBpp0082061	614069 immunodeficiency-centromeric instability-facial anomalies syndrome 2; icf2;
NP_055612.2	BGIBMGA006492	0.24	164	6e-07	FBpp0303073	614069 immunodeficiency-centromeric instability-facial anomalies syndrome 2; icf2;
NP_055612.2	BGIBMGA008687	0.32	117	3e-09	FBpp0112336	614069 immunodeficiency-centromeric instability-facial anomalies syndrome 2; icf2;
NP_055612.2	BGIBMGA008757	0.34	159	5e-21	FBpp0079702	614069 immunodeficiency-centromeric instability-facial anomalies syndrome 2; icf2;
NP_055612.2	BGIBMGA010321	0.34	133	2e-19	FBpp0073236	614069 immunodeficiency-centromeric instability-facial anomalies syndrome 2; icf2;
NP_055612.2	BGIBMGA013125	0.36	127	2e-18	FBpp0303261	614069 immunodeficiency-centromeric instability-facial anomalies syndrome 2; icf2;
NP_060283.3	BGIBMGA004919	0.32	257	2e-26	FBpp0084849	614078 chondrodysplasia with joint dislocations, gpapp type;
NP_060283.3	BGIBMGA011939	0.43	273	5e-56	FBpp0305522	614078 chondrodysplasia with joint dislocations, gpapp type;
NP_060283.3	BGIBMGA012458	0.23	254	3e-10	FBpp0082328	614078 chondrodysplasia with joint dislocations, gpapp type;
NP_789744.1	BGIBMGA001877	0.22	225	2e-06	FBpp0085870	614080 multiple congenital anomalies-hypotonia-seizures syndrome 1; mcahs1;
ADZ15526.1	BGIBMGA003496	0.46	346	8e-91	FBpp0087517	614080 multiple congenital anomalies-hypotonia-seizures syndrome 1; mcahs1;
ADZ15526.1	BGIBMGA004017	0.26	300	4e-08	FBpp0087978	614080 multiple congenital anomalies-hypotonia-seizures syndrome 1; mcahs1;
NP_065796.1	BGIBMGA004877	0.38	691	1e-116	FBpp0076871	614096 combined oxidative phosphorylation deficiency 8; coxpd8;
NP_061899.1	BGIBMGA006200	0.78	178	5e-64	FBpp0080690	614132 craniofacial dysmorphism, skeletal anomalies, and mental retardation syndrome; cfsmr;

## Sheet: Head and neck
Table S1-2. Head and neck disease.
Accession numbers of human genes	SilkDB ID	Identity	Alignment residues amino acid length	Evalue	Drosophila melanogaster orthologs	Disorder
NP_997637.1	BGIBMGA004096	0.4	348	2e-63	FBpp0087524	101800 acrodysostosis 1, with or without hormone resistance; acrdys1; 160980 carney complex, type 1; cnc1; 255960 myxoma, intracardiac; 610489 pigmented nodular adrenocortical disease, primary, 1; ppnad1; 188550 thyroid carcinoma, papillary;
CAH18166.1	BGIBMGA008855	0.26	149	4e-06	FBpp0088350	101800 acrodysostosis 1, with or without hormone resistance; acrdys1; 160980 carney complex, type 1; cnc1; 255960 myxoma, intracardiac; 610489 pigmented nodular adrenocortical disease, primary, 1; ppnad1; 188550 thyroid carcinoma, papillary;
NP_997637.1	BGIBMGA008856	0.36	64	6e-07	FBpp0290613	101800 acrodysostosis 1, with or without hormone resistance; acrdys1; 160980 carney complex, type 1; cnc1; 255960 myxoma, intracardiac; 610489 pigmented nodular adrenocortical disease, primary, 1; ppnad1; 188550 thyroid carcinoma, papillary;
NP_997637.1	BGIBMGA011694	0.69	372	2e-142	FBpp0289762	101800 acrodysostosis 1, with or without hormone resistance; acrdys1; 160980 carney complex, type 1; cnc1; 255960 myxoma, intracardiac; 610489 pigmented nodular adrenocortical disease, primary, 1; ppnad1; 188550 thyroid carcinoma, papillary;
NP_733765.1	BGIBMGA006603	0.73	915	0	FBpp0072127	101900 acrokeratosis verruciformis; akv; 124200 darier-white disease; dar;
NP_004689.1	BGIBMGA012163	0.43	682	6e-140	FBpp0074660	601414 retinitis pigmentosa 18; rp18;
NP_056444.3	BGIBMGA010739	0.28	239	6e-25	FBpp0083625	600138 retinitis pigmentosa 11; rp11;
AAK77986.1	BGIBMGA006896	0.61	249	1e-80	FBpp0075395	600138 retinitis pigmentosa 11; rp11;
BAG63180.1	BGIBMGA006085	0.3	230	8e-27	FBpp0078997	600138 retinitis pigmentosa 11; rp11;
NP_056444.3	BGIBMGA006897	0.58	92	9e-23	FBpp0075395	600138 retinitis pigmentosa 11; rp11;
ADQ32338.1	BGIBMGA005156	0.34	247	2e-37	FBpp0083674	600110 stargardt disease 3; stgd3;
NP_073563.1	BGIBMGA000422	0.4	267	4e-56	FBpp0307411	600110 stargardt disease 3; stgd3;
NP_073563.1	BGIBMGA010945	0.45	215	4e-54	FBpp0083674	600110 stargardt disease 3; stgd3;
NP_073563.1	BGIBMGA011876	0.38	199	1e-34	FBpp0083674	600110 stargardt disease 3; stgd3;
NP_073563.1	BGIBMGA000291	0.39	282	4e-47	FBpp0081313	600110 stargardt disease 3; stgd3;
ADQ32338.1	BGIBMGA010919	0.42	242	2e-58	FBpp0083678	600110 stargardt disease 3; stgd3;
NP_073563.1	BGIBMGA000842	0.54	185	2e-57	FBpp0112074	600110 stargardt disease 3; stgd3;
NP_073563.1	BGIBMGA010921	0.41	254	6e-44	FBpp0083656	600110 stargardt disease 3; stgd3;
NP_073563.1	BGIBMGA010918	0.43	251	4e-57	FBpp0083678	600110 stargardt disease 3; stgd3;
NP_073563.1	BGIBMGA010922	0.34	242	3e-35	FBpp0083656	600110 stargardt disease 3; stgd3;
NP_073563.1	BGIBMGA010923	0.43	259	2e-56	FBpp0083657	600110 stargardt disease 3; stgd3;
NP_073563.1	BGIBMGA000424	0.45	132	8e-33	FBpp0307413	600110 stargardt disease 3; stgd3;
NP_073563.1	BGIBMGA010920	0.38	109	6e-14	FBpp0083674	600110 stargardt disease 3; stgd3;
NP_073563.1	BGIBMGA012702	0.32	181	8e-13	FBpp0075115	600110 stargardt disease 3; stgd3;
NP_006436.3	BGIBMGA009816	0.92	1882	0	FBpp0087124	600059 retinitis pigmentosa 13; rp13;
BAG35452.1	BGIBMGA010437	0.31	101	5e-11	FBpp0077174	312600 retinitis pigmentosa 2; rp2;
NP_937862.1	BGIBMGA010220	0.35	279	4e-37	FBpp0082953	275355 squamous cell carcinoma, head and neck; hnscc;
NP_937862.1	BGIBMGA007480	0.77	61	2e-27	FBpp0080104	275355 squamous cell carcinoma, head and neck; hnscc;
NP_937862.1	BGIBMGA002369	0.47	48	2e-11	FBpp0080104	275355 squamous cell carcinoma, head and neck; hnscc;
NP_937862.1	BGIBMGA009020	0.69	52	8e-22	FBpp0074385	275355 squamous cell carcinoma, head and neck; hnscc;
ABQ52418.1	BGIBMGA000016	0.26	265	5e-20	FBpp0300637	244200 hypogonadotropic hypogonadism 3 with or without anosmia; hh3;
NP_004658.3	BGIBMGA002105	0.25	312	3e-24	FBpp0311963	227220 skin/hair/eye pigmentation, variation in, 1; shep1;
NP_004658.3	BGIBMGA000415	0.3	267	4e-22	FBpp0312193	227220 skin/hair/eye pigmentation, variation in, 1; shep1;
NP_004658.3	BGIBMGA000072	0.29	381	2e-26	FBpp0076784	227220 skin/hair/eye pigmentation, variation in, 1; shep1;
NP_004658.3	BGIBMGA007893	0.3	1579	3e-150	FBpp0290558	227220 skin/hair/eye pigmentation, variation in, 1; shep1;
NP_004658.3	BGIBMGA005799	0.27	340	5e-22	FBpp0077702	227220 skin/hair/eye pigmentation, variation in, 1; shep1;
NP_004658.3	BGIBMGA003027	0.31	215	2e-20	FBpp0077598	227220 skin/hair/eye pigmentation, variation in, 1; shep1;
NP_004658.3	BGIBMGA007894	0.67	395	3e-155	FBpp0290558	227220 skin/hair/eye pigmentation, variation in, 1; shep1;
NP_004658.3	BGIBMGA003192	0.42	72	3e-06	FBpp0075275	227220 skin/hair/eye pigmentation, variation in, 1; shep1;
ABZ92173.1	BGIBMGA011285	0.84	184	1e-88	FBpp0302920	212550 microphthalmia, isolated, with cataract 2; mcopct2;
NP_705932.2	BGIBMGA000675	0.37	240	7e-36	FBpp0309054	210750 skin/hair/eye pigmentation, variation in, 6; shep6;
NP_705934.1	BGIBMGA004795	0.36	84	3e-09	FBpp0310708	210750 skin/hair/eye pigmentation, variation in, 6; shep6;
NP_705933.2	BGIBMGA000538	0.41	469	5e-70	FBpp0309174	210750 skin/hair/eye pigmentation, variation in, 6; shep6;
NP_705934.1	BGIBMGA002239	0.51	178	1e-50	FBpp0307190	210750 skin/hair/eye pigmentation, variation in, 6; shep6;
NP_997235.3	BGIBMGA001162	0.4	449	4e-98	FBpp0312025	210370 bietti crystalline corneoretinal dystrophy;
NP_997235.3	BGIBMGA014043	0.35	463	4e-66	FBpp0078701	210370 bietti crystalline corneoretinal dystrophy;
ADZ15572.1	BGIBMGA001003	0.35	373	2e-65	FBpp0312025	210370 bietti crystalline corneoretinal dystrophy;
NP_997235.3	BGIBMGA009006	0.41	204	7e-37	FBpp0312025	210370 bietti crystalline corneoretinal dystrophy;
ADZ15572.1	BGIBMGA003683	0.4	316	8e-62	FBpp0085074	210370 bietti crystalline corneoretinal dystrophy;
NP_997235.3	BGIBMGA002267	0.29	403	2e-46	FBpp0305085	210370 bietti crystalline corneoretinal dystrophy;
NP_997235.3	BGIBMGA002271	0.34	222	2e-32	FBpp0072837	210370 bietti crystalline corneoretinal dystrophy;
NP_997235.3	BGIBMGA007168	0.37	411	1e-64	FBpp0078701	210370 bietti crystalline corneoretinal dystrophy;
NP_997235.3	BGIBMGA002270	0.3	237	2e-25	FBpp0072837	210370 bietti crystalline corneoretinal dystrophy;
NP_997235.3	BGIBMGA004718	0.42	226	1e-43	FBpp0312025	210370 bietti crystalline corneoretinal dystrophy;
NP_997235.3	BGIBMGA009949	0.33	207	8e-26	FBpp0085074	210370 bietti crystalline corneoretinal dystrophy;
NP_997235.3	BGIBMGA009005	0.33	220	2e-32	FBpp0085074	210370 bietti crystalline corneoretinal dystrophy;
NP_997235.3	BGIBMGA008486	0.39	67	1e-10	FBpp0085074	210370 bietti crystalline corneoretinal dystrophy;
NP_997235.3	BGIBMGA004716	0.38	163	5e-29	FBpp0300785	210370 bietti crystalline corneoretinal dystrophy;
ADZ15572.1	BGIBMGA002272	0.31	318	1e-35	FBpp0311678	210370 bietti crystalline corneoretinal dystrophy;
NP_997235.3	BGIBMGA000868	0.46	136	8e-28	FBpp0311678	210370 bietti crystalline corneoretinal dystrophy;
NP_997235.3	BGIBMGA004719	0.29	152	3e-13	FBpp0070094	210370 bietti crystalline corneoretinal dystrophy;
NP_997235.3	BGIBMGA000056	0.38	224	5e-34	FBpp0072837	210370 bietti crystalline corneoretinal dystrophy;
ADZ15572.1	BGIBMGA000004	0.32	324	3e-42	FBpp0311678	210370 bietti crystalline corneoretinal dystrophy;
NP_997235.3	BGIBMGA000005	0.36	100	2e-09	FBpp0073845	210370 bietti crystalline corneoretinal dystrophy;
NP_997235.3	BGIBMGA004714	0.35	105	2e-16	FBpp0082136	210370 bietti crystalline corneoretinal dystrophy;
ADZ15572.1	BGIBMGA004717	0.36	316	6e-53	FBpp0085074	210370 bietti crystalline corneoretinal dystrophy;
NP_997235.3	BGIBMGA002307	0.28	401	3e-42	FBpp0078701	210370 bietti crystalline corneoretinal dystrophy;
NP_997235.3	BGIBMGA007421	0.36	208	4e-24	FBpp0070412	210370 bietti crystalline corneoretinal dystrophy;
NP_997235.3	BGIBMGA001005	0.47	228	1e-52	FBpp0312025	210370 bietti crystalline corneoretinal dystrophy;
NP_997235.3	BGIBMGA010865	0.31	143	8e-16	FBpp0072837	210370 bietti crystalline corneoretinal dystrophy;
NP_997235.3	BGIBMGA001004	0.38	432	2e-85	FBpp0312025	210370 bietti crystalline corneoretinal dystrophy;
NP_997235.3	BGIBMGA004720	0.41	226	4e-44	FBpp0312025	210370 bietti crystalline corneoretinal dystrophy;
ADZ15572.1	BGIBMGA007195	0.38	330	3e-55	FBpp0078701	210370 bietti crystalline corneoretinal dystrophy;
EAX04624.1	BGIBMGA004678	0.31	501	4e-57	FBpp0311678	210370 bietti crystalline corneoretinal dystrophy;
NP_997235.3	BGIBMGA004721	0.46	187	4e-38	FBpp0085074	210370 bietti crystalline corneoretinal dystrophy;
NP_001699.1	BGIBMGA007786	0.28	309	1e-32	FBpp0082600	190900 tritanopia;
NP_078997.4	BGIBMGA002948	0.22	173	9e-06	FBpp0070791	178300 ptosis, hereditary congenital 1; ptos1;
NP_733796.2	BGIBMGA004158	0.51	128	3e-29	FBpp0087055	142946 holoprosencephaly 4; hpe4;
NP_777480.1	BGIBMGA011254	0.54	61	5e-13	FBpp0081732	142946 holoprosencephaly 4; hpe4;
NP_777480.1	BGIBMGA000639	0.46	56	3e-08	FBpp0303110	142946 holoprosencephaly 4; hpe4;
NP_777480.1	BGIBMGA006116	0.72	81	9e-30	FBpp0087055	142946 holoprosencephaly 4; hpe4;
NP_777480.1	BGIBMGA000638	0.46	63	2e-08	FBpp0289778	142946 holoprosencephaly 4; hpe4;
NP_777480.1	BGIBMGA003176	0.43	61	9e-09	FBpp0300566	142946 holoprosencephaly 4; hpe4;
NP_444504.1	BGIBMGA011743	0.36	255	3e-39	FBpp0087999	138000 glomuvenous malformations; gvm;
AAB93668.1	BGIBMGA002886	0.28	180	3e-09	FBpp0311239	136880 fundus albipunctatus;
BAD96528.1	BGIBMGA008951	0.54	299	3e-85	FBpp0080409	121800 schnyder corneal dystrophy; sccd;
AAI15399.1	BGIBMGA001129	0.57	310	1e-81	FBpp0300451	108985 sveinsson chorioretinal atrophy; scra;
NP_001166031.1	BGIBMGA006675	0.43	294	7e-60	FBpp0305089	102200 pituitary adenoma, growth hormone-secreting;
NP_001166031.1	BGIBMGA008534	0.26	272	1e-19	FBpp0301972	102200 pituitary adenoma, growth hormone-secreting;
NP_001166031.1	BGIBMGA011685	0.29	121	2e-06	FBpp0083284	102200 pituitary adenoma, growth hormone-secreting;
NP_001070957.1	BGIBMGA004269	0.68	379	5e-148	FBpp0309944	102200 pituitary adenoma, growth hormone-secreting; 174800 mccune-albright syndrome; mas; 166350 osseous heteroplasia, progressive; poh; 103580 pseudohypoparathyroidism, type ia; php1a; 603233 pseudohypoparathyroidism, type ib; php1b; 612462 pseudohypoparathyroidism, type ic; php1c; 612463 pseudopseudohypoparathyroidism; pphp;
NP_001070957.1	BGIBMGA004344	0.74	379	3e-163	FBpp0309944	102200 pituitary adenoma, growth hormone-secreting; 174800 mccune-albright syndrome; mas; 166350 osseous heteroplasia, progressive; poh; 103580 pseudohypoparathyroidism, type ia; php1a; 603233 pseudohypoparathyroidism, type ib; php1b; 612462 pseudohypoparathyroidism, type ic; php1c; 612463 pseudopseudohypoparathyroidism; pphp;
NP_536351.1	BGIBMGA009786	0.45	166	2e-35	FBpp0075113	102200 pituitary adenoma, growth hormone-secreting; 174800 mccune-albright syndrome; mas; 166350 osseous heteroplasia, progressive; poh; 103580 pseudohypoparathyroidism, type ia; php1a; 603233 pseudohypoparathyroidism, type ib; php1b; 612462 pseudohypoparathyroidism, type ic; php1c; 612463 pseudopseudohypoparathyroidism; pphp;
CAI42936.1	BGIBMGA013566	0.47	148	2e-41	FBpp0309829	102200 pituitary adenoma, growth hormone-secreting; 174800 mccune-albright syndrome; mas; 166350 osseous heteroplasia, progressive; poh; 103580 pseudohypoparathyroidism, type ia; php1a; 603233 pseudohypoparathyroidism, type ib; php1b; 612462 pseudohypoparathyroidism, type ic; php1c; 612463 pseudopseudohypoparathyroidism; pphp;
NP_000013.2	BGIBMGA001278	0.29	174	1e-08	FBpp0081451	102700 severe combined immunodeficiency, autosomal recessive, t cell-negative, b cell-negative, nk cell-negative, due to adenosine deaminase deficiency;
NP_000017.1	BGIBMGA007119	0.69	396	2e-147	FBpp0082816	103050 adenylosuccinase deficiency;
NP_000693.1	BGIBMGA005630	0.46	991	0	FBpp0305517	104290 alternating hemiplegia of childhood 1; ahc1; 602481 migraine, familial hemiplegic, 2; fhm2;
NP_570854.1	BGIBMGA001267	0.45	851	0	FBpp0075916	105830 angelman syndrome; as;
NP_570854.1	BGIBMGA007539	0.3	254	9e-24	FBpp0306924	105830 angelman syndrome; as;
NP_570854.1	BGIBMGA010628	0.26	280	3e-18	FBpp0079663	105830 angelman syndrome; as;
NP_570854.1	BGIBMGA012577	0.38	434	3e-79	FBpp0072564	105830 angelman syndrome; as;
NP_003150.1	BGIBMGA001550	0.36	289	1e-43	FBpp0070723	105830 angelman syndrome; as; 300672 epileptic encephalopathy, early infantile, 2; eiee2;
NP_003150.1	BGIBMGA003474	0.31	229	1e-24	FBpp0070041	105830 angelman syndrome; as; 300672 epileptic encephalopathy, early infantile, 2; eiee2;
NP_003150.1	BGIBMGA004055	0.38	99	3e-13	FBpp0303824	105830 angelman syndrome; as; 300672 epileptic encephalopathy, early infantile, 2; eiee2;
NP_003150.1	BGIBMGA004790	0.45	289	3e-72	FBpp0292076	105830 angelman syndrome; as; 300672 epileptic encephalopathy, early infantile, 2; eiee2;
NP_003150.1	BGIBMGA004946	0.3	132	1e-15	FBpp0083530	105830 angelman syndrome; as; 300672 epileptic encephalopathy, early infantile, 2; eiee2;
NP_003150.1	BGIBMGA009109	0.49	234	8e-65	FBpp0292076	105830 angelman syndrome; as; 300672 epileptic encephalopathy, early infantile, 2; eiee2;
NP_003150.1	BGIBMGA009883	0.39	283	8e-45	FBpp0304962	105830 angelman syndrome; as; 300672 epileptic encephalopathy, early infantile, 2; eiee2;
NP_004983.1	BGIBMGA001425	0.53	62	8e-09	FBpp0081546	105830 angelman syndrome; as; 300673 encephalopathy, neonatal severe, due to mecp2 mutations; 300260 lubs x-linked mental retardation syndrome; mrxsl; 300055 mental retardation, x-linked, syndromic 13; mrxs13; 312750 rett syndrome; rtt; 300496 autism, susceptibility to, x-linked 3; autsx3;
CAA61599.1	BGIBMGA003413	0.32	87	2e-06	FBpp0082081	105830 angelman syndrome; as; 300673 encephalopathy, neonatal severe, due to mecp2 mutations; 300260 lubs x-linked mental retardation syndrome; mrxsl; 300055 mental retardation, x-linked, syndromic 13; mrxs13; 312750 rett syndrome; rtt; 300496 autism, susceptibility to, x-linked 3; autsx3;
NP_036318.1	BGIBMGA003547	0.43	168	2e-33	FBpp0308353	107250 anterior segment mesenchymal dysgenesis; asmd; 610256 aphakia, congenital primary;
NP_002959.2	BGIBMGA002946	0.47	193	1e-44	FBpp0088852	107480 townes-brocks syndrome; tbs;
NP_002959.2	BGIBMGA008808	0.46	57	3e-09	FBpp0297872	107480 townes-brocks syndrome; tbs;
NP_075461.2	BGIBMGA005913	0.23	249	4e-13	FBpp0311139	108500 episodic ataxia, type 2; ea2; 141500 migraine, familial hemiplegic, 1; fhm1; 183086 spinocerebellar ataxia 6; sca6;
ADD00730.1	BGIBMGA002812	0.31	163	3e-09	FBpp0070860	109150 machado-joseph disease; mjd;
AAN64133.1	BGIBMGA001949	0.24	501	2e-26	FBpp0070141	109800 bladder cancer; 259500 osteogenic sarcoma; 180200 retinoblastoma; rb1; 182280 small cell cancer of the lung;
NP_004551.2	BGIBMGA010343	0.47	313	6e-83	FBpp0079568	113000 brachydactyly, type b1; bdb1; 268310 robinow syndrome, autosomal recessive; rrs;
NP_003211.1	BGIBMGA004491	0.66	68	2e-20	FBpp0305658	113620 branchiooculofacial syndrome; bofs;
BAG58690.1	BGIBMGA004453	0.51	464	5e-108	FBpp0297250	113650 branchiootorenal syndrome 1; bor1; 166780 otofaciocervical syndrome;
NP_000337.1	BGIBMGA008274	0.25	113	6e-09	FBpp0304134	114290 campomelic dysplasia;
BAG58389.1	BGIBMGA011668	0.49	116	6e-27	FBpp0086702	114290 campomelic dysplasia;
CAA82333.1	BGIBMGA001268	0.29	653	2e-60	FBpp0291030	114480 breast cancer; 114500 colorectal cancer; crc; 137215 gastric cancer, hereditary diffuse; hdgc; 114550 hepatocellular carcinoma; 182000 keratosis, seborrheic; 162900 nevus, epidermal; 211980 lung cancer; 167000 ovarian cancer;
NP_006209.2	BGIBMGA002921	0.37	1016	4e-174	FBpp0306705	114480 breast cancer; 114500 colorectal cancer; crc; 137215 gastric cancer, hereditary diffuse; hdgc; 114550 hepatocellular carcinoma; 182000 keratosis, seborrheic; 162900 nevus, epidermal; 211980 lung cancer; 167000 ovarian cancer;
CAA82333.1	BGIBMGA007158	0.27	396	1e-35	FBpp0071973	114480 breast cancer; 114500 colorectal cancer; crc; 137215 gastric cancer, hereditary diffuse; hdgc; 114550 hepatocellular carcinoma; 182000 keratosis, seborrheic; 162900 nevus, epidermal; 211980 lung cancer; 167000 ovarian cancer;
NP_006209.2	BGIBMGA007986	0.32	210	6e-08	FBpp0305064	114480 breast cancer; 114500 colorectal cancer; crc; 137215 gastric cancer, hereditary diffuse; hdgc; 114550 hepatocellular carcinoma; 182000 keratosis, seborrheic; 162900 nevus, epidermal; 211980 lung cancer; 167000 ovarian cancer;
CAA82333.1	BGIBMGA012830	0.26	451	2e-30	FBpp0303977	114480 breast cancer; 114500 colorectal cancer; crc; 137215 gastric cancer, hereditary diffuse; hdgc; 114550 hepatocellular carcinoma; 182000 keratosis, seborrheic; 162900 nevus, epidermal; 211980 lung cancer; 167000 ovarian cancer;
AAD11941.1	BGIBMGA012531	0.3	452	1e-45	FBpp0085368	114500 colorectal cancer; crc; 257300 mosaic variegated aneuploidy syndrome 1; mva1; 176430 premature chromatid separation trait; pcs;
NP_002746.1	BGIBMGA001458	0.68	381	2e-149	FBpp0071248	115150 cardiofaciocutaneous syndrome 1; cfc1;
NP_002746.1	BGIBMGA005641	0.37	316	7e-52	FBpp0073551	115150 cardiofaciocutaneous syndrome 1; cfc1;
NP_002746.1	BGIBMGA007238	0.37	321	8e-47	FBpp0306434	115150 cardiofaciocutaneous syndrome 1; cfc1;
NP_002746.1	BGIBMGA007646	0.38	295	2e-48	FBpp0303423	115150 cardiofaciocutaneous syndrome 1; cfc1;
NP_001529.2	BGIBMGA003704	0.37	72	5e-08	FBpp0085961	116800 cataract 5, multiple types; ctrct5;
NP_919438.1	BGIBMGA004815	0.27	231	1e-20	FBpp0311466	116860 cerebral cavernous malformations; ccm;
NP_001120963.1	BGIBMGA006803	0.41	66	1e-08	FBpp0309123	116920 leukocyte adhesion deficiency, type i; lad;
NP_001036188.1	BGIBMGA000742	0.32	104	7e-11	FBpp0297356	117000 central core disease of muscle; 255320 minicore myopathy with external ophthalmoplegia; 145600 malignant hyperthermia, susceptibility to, 1; mhs1;
NP_904325.2	BGIBMGA000816	0.46	557	5e-126	FBpp0293213	118210 charcot-marie-tooth disease, axonal, type 2a1; cmt2a1; 171300 pheochromocytoma; 256700 neuroblastoma, susceptibility to;
NP_904325.2	BGIBMGA003619	0.55	82	1e-17	FBpp0312023	118210 charcot-marie-tooth disease, axonal, type 2a1; cmt2a1; 171300 pheochromocytoma; 256700 neuroblastoma, susceptibility to;
NP_055889.2	BGIBMGA003620	0.38	655	2e-97	FBpp0302989	118210 charcot-marie-tooth disease, axonal, type 2a1; cmt2a1; 171300 pheochromocytoma; 256700 neuroblastoma, susceptibility to;
NP_904325.2	BGIBMGA004997	0.33	127	2e-18	FBpp0293213	118210 charcot-marie-tooth disease, axonal, type 2a1; cmt2a1; 171300 pheochromocytoma; 256700 neuroblastoma, susceptibility to;
NP_904325.2	BGIBMGA005875	0.29	304	2e-22	FBpp0310067	118210 charcot-marie-tooth disease, axonal, type 2a1; cmt2a1; 171300 pheochromocytoma; 256700 neuroblastoma, susceptibility to;
AAN17742.1	BGIBMGA007234	0.41	231	2e-32	FBpp0089282	118210 charcot-marie-tooth disease, axonal, type 2a1; cmt2a1; 171300 pheochromocytoma; 256700 neuroblastoma, susceptibility to;
NP_904325.2	BGIBMGA007454	0.75	32	9e-08	FBpp0112002	118210 charcot-marie-tooth disease, axonal, type 2a1; cmt2a1; 171300 pheochromocytoma; 256700 neuroblastoma, susceptibility to;
NP_055889.2	BGIBMGA007455	0.52	488	5e-132	FBpp0086227	118210 charcot-marie-tooth disease, axonal, type 2a1; cmt2a1; 171300 pheochromocytoma; 256700 neuroblastoma, susceptibility to;
NP_055889.2	BGIBMGA007456	0.57	120	9e-36	FBpp0112002	118210 charcot-marie-tooth disease, axonal, type 2a1; cmt2a1; 171300 pheochromocytoma; 256700 neuroblastoma, susceptibility to;
NP_904325.2	BGIBMGA010931	0.39	346	6e-57	FBpp0306018	118210 charcot-marie-tooth disease, axonal, type 2a1; cmt2a1; 171300 pheochromocytoma; 256700 neuroblastoma, susceptibility to;
NP_904325.2	BGIBMGA011193	0.3	344	5e-32	FBpp0073083	118210 charcot-marie-tooth disease, axonal, type 2a1; cmt2a1; 171300 pheochromocytoma; 256700 neuroblastoma, susceptibility to;
NP_000205.1	BGIBMGA000783	0.42	681	5e-166	FBpp0310538	118450 alagille syndrome 1; algs1; 187500 tetralogy of fallot; tof;
NP_000205.1	BGIBMGA008395	0.37	265	6e-47	FBpp0073256	118450 alagille syndrome 1; algs1; 187500 tetralogy of fallot; tof;
NP_000205.1	BGIBMGA010195	0.45	385	7e-118	FBpp0293200	118450 alagille syndrome 1; algs1; 187500 tetralogy of fallot; tof;
NP_056080.1	BGIBMGA002615	0.39	97	2e-12	FBpp0089292	119540 cleft palate, isolated; cpi;
NP_061828.1	BGIBMGA001415	0.99	228	2e-121	FBpp0305348	119540 cleft palate, isolated; cpi;
NP_061828.1	BGIBMGA001549	0.99	153	7e-81	FBpp0311816	119540 cleft palate, isolated; cpi;
NP_061828.1	BGIBMGA006819	0.34	71	2e-06	FBpp0305835	119540 cleft palate, isolated; cpi;
NP_061828.1	BGIBMGA007334	0.59	76	2e-16	FBpp0309711	119540 cleft palate, isolated; cpi;
NP_061828.1	BGIBMGA007406	0.43	76	4e-11	FBpp0311816	119540 cleft palate, isolated; cpi;
NP_061828.1	BGIBMGA010604	0.99	76	3e-36	FBpp0306837	119540 cleft palate, isolated; cpi;
NP_061828.1	BGIBMGA011273	0.52	146	1e-23	FBpp0079606	119540 cleft palate, isolated; cpi;
NP_004339.3	BGIBMGA008907	0.81	73	9e-29	FBpp0303587	119600 cleidocranial dysplasia; ccd;
NP_003981.2	BGIBMGA000933	0.75	44	6e-15	FBpp0304397	120330 papillorenal syndrome;
NP_003981.2	BGIBMGA013358	0.9	117	6e-56	FBpp0290778	120330 papillorenal syndrome;
BAG62163.1	BGIBMGA000207	0.43	480	2e-129	FBpp0304632	121050 arthrogryposis, distal, type 9; da9;
NP_001990.2	BGIBMGA000209	0.39	823	0	FBpp0288716	121050 arthrogryposis, distal, type 9; da9;
NP_001990.2	BGIBMGA006856	0.25	2613	1e-141	FBpp0304631	121050 arthrogryposis, distal, type 9; da9;
NP_001990.2	BGIBMGA010892	0.22	170	8e-06	FBpp0304632	121050 arthrogryposis, distal, type 9; da9;
NP_001990.2	BGIBMGA012379	0.36	201	3e-35	FBpp0304632	121050 arthrogryposis, distal, type 9; da9;
NP_055855.2	BGIBMGA002300	0.41	73	1e-10	FBpp0308371	121850 corneal dystrophy, fleck;
NP_055855.2	BGIBMGA010374	0.38	60	6e-08	FBpp0078775	121850 corneal dystrophy, fleck;
NP_055855.2	BGIBMGA011603	0.27	683	2e-39	FBpp0088523	121850 corneal dystrophy, fleck;
NP_597677.2	BGIBMGA006830	0.41	1438	0	FBpp0290671	122470 cornelia de lange syndrome 1; cdls1;
ABZ92174.1	BGIBMGA008094	0.51	121	1e-18	FBpp0308010	122880 craniofacial-deafness-hand syndrome; cdhs; 268220 rhabdomyosarcoma 2; rms2; 193500 waardenburg syndrome, type 1; ws1; 148820 waardenburg syndrome, type 3; ws3;
NP_001120838.1	BGIBMGA009025	0.66	276	3e-95	FBpp0072349	122880 craniofacial-deafness-hand syndrome; cdhs; 268220 rhabdomyosarcoma 2; rms2; 193500 waardenburg syndrome, type 1; ws1; 148820 waardenburg syndrome, type 3; ws3;
NP_000465.1	BGIBMGA008990	0.67	97	1e-30	FBpp0311714	123100 craniosynostosis 1; crs1; 101400 saethre-chotzen syndrome; scs;
BAC86188.1	BGIBMGA004185	0.33	112	2e-08		123700 cutis laxa, autosomal dominant 1; adcl1; 185500 supravalvular aortic stenosis; svas;
NP_055217.2	BGIBMGA000923	0.5	82	5e-19	FBpp0305844	124000 mitochondrial complex iii deficiency, nuclear type 1; mc3dn1;
BAG34699.1	BGIBMGA003544	0.54	80	2e-21	FBpp0084648	124000 mitochondrial complex iii deficiency, nuclear type 1; mc3dn1;
NP_000426.2	BGIBMGA004843	0.39	62	4e-07	FBpp0293200	125310 cerebral arteriopathy, autosomal dominant, with subcortical infarcts and leukoencephalopathy; cadasil;
NP_000426.2	BGIBMGA007610	0.42	86	8e-15	FBpp0306945	125310 cerebral arteriopathy, autosomal dominant, with subcortical infarcts and leukoencephalopathy; cadasil;
NP_000426.2	BGIBMGA009611	0.35	316	8e-45	FBpp0303574	125310 cerebral arteriopathy, autosomal dominant, with subcortical infarcts and leukoencephalopathy; cadasil;
NP_001019195.1	BGIBMGA001235	0.75	186	4e-77	FBpp0071507	128230 dystonia, dopa-responsive; drd; 233910 hyperphenylalaninemia, bh4-deficient, b; hpabh4b;
BAH14440.1	BGIBMGA005058	0.76	852	0	FBpp0088502	128235 dystonia 12; dyt12;
BAH14440.1	BGIBMGA011683	0.53	147	1e-42	FBpp0088981	128235 dystonia 12; dyt12;
AAH28178.1	BGIBMGA000691	0.26	792	3e-14	FBpp0075796	130020 ehlers-danlos syndrome, type iii; 130050 ehlers-danlos syndrome, type iv, autosomal dominant;
NP_009186.1	BGIBMGA010795	0.59	231	5e-79	FBpp0084130	130070 ehlers-danlos syndrome, progeroid type, 1; edsp1;
NP_009186.1	BGIBMGA010796	0.59	231	2e-77	FBpp0084130	130070 ehlers-danlos syndrome, progeroid type, 1; edsp1;
NP_758859.1	BGIBMGA001497	0.32	233	1e-26	FBpp0297152	130650 beckwith-wiedemann syndrome; bws; 601626 leukemia, acute myeloid; aml; 117550 sotos syndrome 1; sotos1; 277590 weaver syndrome; wvs;
NP_758859.1	BGIBMGA002246	0.49	506	6e-147	FBpp0307022	130650 beckwith-wiedemann syndrome; bws; 601626 leukemia, acute myeloid; aml; 117550 sotos syndrome 1; sotos1; 277590 weaver syndrome; wvs;
AAK92049.1	BGIBMGA003106	0.39	224	1e-40	FBpp0290774	130650 beckwith-wiedemann syndrome; bws; 601626 leukemia, acute myeloid; aml; 117550 sotos syndrome 1; sotos1; 277590 weaver syndrome; wvs;
AAA57253.1	BGIBMGA001836	0.51	654	4e-161	FBpp0112980	132400 epiphyseal dysplasia, multiple, 1; edm1; 177170 pseudoachondroplasia; psach;
NP_036325.2	BGIBMGA004639	0.41	466	1e-107	FBpp0304981	133780 exudative vitreoretinopathy 1; evr1;
NP_036325.2	BGIBMGA005935	0.46	425	1e-110	FBpp0303135	133780 exudative vitreoretinopathy 1; evr1;
NP_036325.2	BGIBMGA007384	0.3	263	1e-22	FBpp0087010	133780 exudative vitreoretinopathy 1; evr1;
NP_036325.2	BGIBMGA007492	0.26	135	5e-11	FBpp0303135	133780 exudative vitreoretinopathy 1; evr1;
NP_001104537.1	BGIBMGA009134	0.6	334	1e-94	FBpp0300982	135100 fibrodysplasia ossificans progressiva; fop;
NP_005624.2	BGIBMGA000696	0.25	245	1e-22	FBpp0086182	135300 fibromatosis, gingival, 1; gingf1; 610733 noonan syndrome 4; ns4;
NP_005624.2	BGIBMGA007203	0.28	280	3e-27	FBpp0080118	135300 fibromatosis, gingival, 1; gingf1; 610733 noonan syndrome 4; ns4;
NP_005624.2	BGIBMGA011102	0.39	679	3e-111	FBpp0080118	135300 fibromatosis, gingival, 1; gingf1; 610733 noonan syndrome 4; ns4;
NP_060111.2	BGIBMGA003593	0.43	74	6e-13	FBpp0304032	135700 fibrosis of extraocular muscles, congenital, 1; cfeom1;
NP_060111.2	BGIBMGA003594	0.44	724	6e-113	FBpp0304032	135700 fibrosis of extraocular muscles, congenital, 1; cfeom1;
NP_001166934.1	BGIBMGA005102	0.27	1101	2e-92	FBpp0309092	135700 fibrosis of extraocular muscles, congenital, 1; cfeom1;
NP_060111.2	BGIBMGA006043	0.26	172	3e-06	FBpp0305598	135700 fibrosis of extraocular muscles, congenital, 1; cfeom1;
AAP97680.1	BGIBMGA006545	0.32	367	1e-43	FBpp0311231	135700 fibrosis of extraocular muscles, congenital, 1; cfeom1;
AAP97680.1	BGIBMGA008726	0.38	411	7e-60	FBpp0072616	135700 fibrosis of extraocular muscles, congenital, 1; cfeom1;
NP_000220.1	BGIBMGA003771	0.35	379	1e-67	FBpp0303512	136120 fish-eye disease; fed; 245900 lecithin:cholesterol acyltransferase deficiency;
NP_001291.3	BGIBMGA001422	0.59	82	1e-26	FBpp0070703	137215 gastric cancer, hereditary diffuse; hdgc; 176807 prostate cancer;
NP_001291.3	BGIBMGA002047	0.88	81	5e-42	FBpp0305280	137215 gastric cancer, hereditary diffuse; hdgc; 176807 prostate cancer;
AAC39929.1	BGIBMGA011419	0.7	98	2e-39	FBpp0292301	137215 gastric cancer, hereditary diffuse; hdgc; 176807 prostate cancer;
NP_000252.1	BGIBMGA001979	0.26	263	2e-22	FBpp0088539	137750 glaucoma 1, open angle, a; glc1a;
NP_004264.2	BGIBMGA004519	0.24	342	2e-19	FBpp0309851	143095 spondyloepiphyseal dysplasia with congenital joint dislocations;
NP_002102.4	BGIBMGA002250	0.45	78	3e-11		143100 huntington disease; hd;
NP_002102.4	BGIBMGA002251	0.27	1020	2e-78	FBpp0307764	143100 huntington disease; hd;
NP_000789.1	BGIBMGA002275	0.43	160	4e-28	FBpp0303554	143465 attention deficit-hyperactivity disorder; adhd; 606798 blepharospasm, benign essential;
NP_000789.1	BGIBMGA014128	0.36	197	1e-25	FBpp0303088	143465 attention deficit-hyperactivity disorder; adhd; 606798 blepharospasm, benign essential;
NP_001182729.1	BGIBMGA006908	0.42	119	4e-18	FBpp0305271	143890 hypercholesterolemia, familial;
AAG14967.1	BGIBMGA001018	0.26	278	2e-18		143890 hypercholesterolemia, familial;
NP_001159921.1	BGIBMGA007558	0.36	570	6e-75		143890 hypercholesterolemia, familial;
NP_114438.1	BGIBMGA005910	0.38	72	7e-08	FBpp0309550	145500 hypertension, essential; 267430 renal tubular dysgenesis; rtd;
NP_870998.2	BGIBMGA005884	0.25	408	1e-13	FBpp0088573	145900 hypertrophic neuropathy of dejerine-sottas;
NP_075598.2	BGIBMGA008036	0.47	259	2e-69	FBpp0084248	146110 hypogonadotropic hypogonadism 7 with or without anosmia; hh7; 123150 jackson-weiss syndrome; jws; 147950 hypogonadotropic hypogonadism 2 with or without anosmia; hh2; 166250 osteoglophonic dysplasia; ogd; 101600 pfeiffer syndrome; 190440 trigonocephaly 1; trigno1;
NP_001002295.1	BGIBMGA000450	0.94	51	2e-25	FBpp0303221	146255 hypoparathyroidism, sensorineural deafness, and renal disease; hdr;
NP_002042.1	BGIBMGA002156	0.4	131	3e-23	FBpp0297354	146255 hypoparathyroidism, sensorineural deafness, and renal disease; hdr;
NP_002042.1	BGIBMGA002159	0.73	56	2e-19	FBpp0307409	146255 hypoparathyroidism, sensorineural deafness, and renal disease; hdr;
ADR83041.1	BGIBMGA008401	0.43	463	5e-92	FBpp0306282	146300 hypophosphatasia, adult; 241510 hypophosphatasia, childhood; 241500 hypophosphatasia, infantile;
ADR83041.1	BGIBMGA008818	0.46	445	4e-107	FBpp0311651	146300 hypophosphatasia, adult; 241510 hypophosphatasia, childhood; 241500 hypophosphatasia, infantile;
ADR83041.1	BGIBMGA008824	0.46	445	9e-106	FBpp0087603	146300 hypophosphatasia, adult; 241510 hypophosphatasia, childhood; 241500 hypophosphatasia, infantile;
ADR83041.1	BGIBMGA009866	0.47	436	2e-95	FBpp0311826	146300 hypophosphatasia, adult; 241510 hypophosphatasia, childhood; 241500 hypophosphatasia, infantile;
ADR83041.1	BGIBMGA009872	0.43	506	3e-100	FBpp0078050	146300 hypophosphatasia, adult; 241510 hypophosphatasia, childhood; 241500 hypophosphatasia, infantile;
BAA32129.1	BGIBMGA011462	0.46	283	4e-63	FBpp0311651	146300 hypophosphatasia, adult; 241510 hypophosphatasia, childhood; 241500 hypophosphatasia, infantile;
NP_001170991.1	BGIBMGA011463	0.46	176	2e-32	FBpp0078050	146300 hypophosphatasia, adult; 241510 hypophosphatasia, childhood; 241500 hypophosphatasia, infantile;
ADR83041.1	BGIBMGA014304	0.47	478	4e-112	FBpp0087603	146300 hypophosphatasia, adult; 241510 hypophosphatasia, childhood; 241500 hypophosphatasia, infantile;
NP_003473.3	BGIBMGA000414	0.32	109	1e-09	FBpp0307242	147920 kabuki syndrome 1; kabuk1;
AAC51735.1	BGIBMGA002502	0.31	724	9e-83	FBpp0309963	147920 kabuki syndrome 1; kabuk1;
NP_003473.3	BGIBMGA002503	0.71	147	7e-59	FBpp0070347	147920 kabuki syndrome 1; kabuk1;
NP_003473.3	BGIBMGA003897	0.38	64	9e-08	FBpp0085204	147920 kabuki syndrome 1; kabuk1;
NP_003473.3	BGIBMGA004352	0.54	54	7e-16	FBpp0307242	147920 kabuki syndrome 1; kabuk1;
NP_003473.3	BGIBMGA005421	0.3	222	9e-07	FBpp0305773	147920 kabuki syndrome 1; kabuk1;
NP_003473.3	BGIBMGA007859	0.35	173	3e-10	FBpp0307021	147920 kabuki syndrome 1; kabuk1;
NP_003473.3	BGIBMGA008253	0.29	163	1e-08	FBpp0073569	147920 kabuki syndrome 1; kabuk1;
NP_005242.1	BGIBMGA013330	0.82	123	7e-57	FBpp0078049	153400 lymphedema-distichiasis syndrome;
NP_476508.2	BGIBMGA001246	0.5	52	4e-10	FBpp0086129	158810 bethlem myopathy; 254090 ullrich congenital muscular dystrophy; ucmd;
BAD93069.1	BGIBMGA006593	0.4	115	3e-13	FBpp0306720	159900 myoclonic dystonia;
NP_057658.2	BGIBMGA008273	0.57	84	4e-21	FBpp0309862	159900 myoclonic dystonia;
AAF61479.1	BGIBMGA011067	0.34	395	5e-52	FBpp0291142	159900 myoclonic dystonia;
BAG60490.1	BGIBMGA000030	0.3	209	3e-15	FBpp0302966	159900 myoclonic dystonia;
NP_000208.2	BGIBMGA003851	0.71	408	2e-132	FBpp0292034	160120 episodic ataxia, type 1; ea1;
NP_000208.2	BGIBMGA013355	0.34	338	7e-50	FBpp0305471	160120 episodic ataxia, type 1; ea1;
NP_001075031.1	BGIBMGA003038	0.44	396	1e-93	FBpp0309137	160900 myotonic dystrophy 1; dm1;
AAH26328.1	BGIBMGA006330	0.39	320	3e-67	FBpp0085082	160900 myotonic dystrophy 1; dm1;
AAB31800.1	BGIBMGA008122	0.47	506	5e-130	FBpp0072194	160900 myotonic dystrophy 1; dm1;
NP_001075031.1	BGIBMGA012856	0.35	347	3e-47	FBpp0075702	160900 myotonic dystrophy 1; dm1;
NP_002307.2	BGIBMGA013872	0.33	218	5e-30	FBpp0309708	161200 nail-patella syndrome; nps;
AAP37280.1	BGIBMGA005577	0.86	254	9e-131	FBpp0085365	161800 nemaline myopathy 3; nem3; 255310 myopathy, congenital, with fiber-type disproportion; cftd;
NP_006631.2	BGIBMGA003744	0.49	248	6e-66	FBpp0087870	162100 amyotrophy, hereditary neuralgic; hna;
NP_006631.2	BGIBMGA005490	0.46	290	1e-68	FBpp0074145	162100 amyotrophy, hereditary neuralgic; hna;
NP_006631.2	BGIBMGA009380	0.42	291	2e-65	FBpp0083352	162100 amyotrophy, hereditary neuralgic; hna;
NP_006631.2	BGIBMGA012966	0.44	277	1e-65	FBpp0076897	162100 amyotrophy, hereditary neuralgic; hna;
NP_006406.1	BGIBMGA011964	0.45	436	7e-101	FBpp0086844	162400 neuropathy, hereditary sensory and autonomic, type ia; hsan1a;
NP_004634.1	BGIBMGA001950	0.69	169	6e-61	FBpp0087864	164300 oculopharyngeal muscular dystrophy; opmd;
NP_001121636.1	BGIBMGA011826	0.4	128	4e-21	FBpp0289092	164400 spinocerebellar ataxia 1; sca1;
NP_001170858.1	BGIBMGA013055	0.65	54	2e-14		164500 spinocerebellar ataxia 7; sca7;
NP_001017536.1	BGIBMGA010782	0.46	109	3e-23	FBpp0084131	166710 osteoporosis; 277440 vitamin d-dependent rickets, type 2a; vddr2a;
NP_001017536.1	BGIBMGA010783	0.26	172	6e-06	FBpp0084131	166710 osteoporosis; 277440 vitamin d-dependent rickets, type 2a; vddr2a;
NP_005564.1	BGIBMGA003652	0.39	516	2e-81	FBpp0312110	169500 leukodystrophy, demyelinating, adult-onset, autosomal dominant; adld;
CAG46470.1	BGIBMGA008521	0.55	461	9e-128	FBpp0311237	170100 prolidase deficiency;
NP_003059.1	BGIBMGA000604	0.55	141	5e-45	FBpp0305342	172800 piebald trait; pbt; 608890 waardenburg syndrome, type 2d; ws2d;
NP_003059.1	BGIBMGA000605	0.61	89	3e-32	FBpp0305342	172800 piebald trait; pbt; 608890 waardenburg syndrome, type 2d; ws2d;
NP_003059.1	BGIBMGA000607	0.5	173	8e-46	FBpp0305342	172800 piebald trait; pbt; 608890 waardenburg syndrome, type 2d; ws2d;
NP_003059.1	BGIBMGA006230	0.76	140	5e-63	FBpp0080293	172800 piebald trait; pbt; 608890 waardenburg syndrome, type 2d; ws2d;
NP_003059.1	BGIBMGA014176	0.54	78	8e-22	FBpp0083051	172800 piebald trait; pbt; 608890 waardenburg syndrome, type 2d; ws2d;
BAG37018.1	BGIBMGA005106	0.41	582	4e-123	FBpp0073066	173650 kindler syndrome;
NP_060141.3	BGIBMGA013373	0.24	119	9e-06	FBpp0305321	173650 kindler syndrome;
NP_005350.1	BGIBMGA010110	0.72	283	6e-98	FBpp0307959	175050 juvenile polyposis/hereditary hemorrhagic telangiectasia syndrome; jpht; 174900 juvenile polyposis syndrome; jps;
NP_000446.1	BGIBMGA000420	0.61	325	4e-103	FBpp0290703	175200 peutz-jeghers syndrome; pjs; 273300 testicular germ cell tumor; tgct;
NP_000446.1	BGIBMGA006138	0.32	123	1e-12	FBpp0077893	175200 peutz-jeghers syndrome; pjs; 273300 testicular germ cell tumor; tgct;
NP_000159.3	BGIBMGA004545	0.8	176	8e-85	FBpp0297298	175700 greig cephalopolysyndactyly syndrome; gcps; 146510 pallister-hall syndrome; phs; 174200 polydactyly, postaxial, type a1; papa1; 174700 polydactyly, preaxial iv; 241800 hypothalamic hamartomas;
NP_000159.3	BGIBMGA005001	0.41	68	8e-07	FBpp0311930	175700 greig cephalopolysyndactyly syndrome; gcps; 146510 pallister-hall syndrome; phs; 174200 polydactyly, postaxial, type a1; papa1; 174700 polydactyly, preaxial iv; 241800 hypothalamic hamartomas;
NP_000159.3	BGIBMGA013124	0.44	73	8e-10	FBpp0291128	175700 greig cephalopolysyndactyly syndrome; gcps; 146510 pallister-hall syndrome; phs; 174200 polydactyly, postaxial, type a1; papa1; 174700 polydactyly, preaxial iv; 241800 hypothalamic hamartomas;
NP_073719.1	BGIBMGA003004	0.55	144	4e-28	FBpp0293061	176270 prader-willi syndrome; pws;
NP_073719.1	BGIBMGA008493	0.35	84	1e-08	FBpp0304730	176270 prader-willi syndrome; pws;
NP_002478.1	BGIBMGA009056	0.28	192	1e-10		176270 prader-willi syndrome; pws;
AAA60165.1	BGIBMGA003105	0.25	199	5e-06	FBpp0077481	176860 thrombophilia due to protein c deficiency, autosomal dominant; thph3; 612304 thrombophilia due to protein c deficiency, autosomal recessive; thph4;
Q8IXB4	BGIBMGA006747	0.23	122	4e-07	FBpp0083021	176860 thrombophilia due to protein c deficiency, autosomal dominant; thph3; 612304 thrombophilia due to protein c deficiency, autosomal recessive; thph4;
NP_000303.1	BGIBMGA007365	0.24	232	4e-08	FBpp0080557	176860 thrombophilia due to protein c deficiency, autosomal dominant; thph3; 612304 thrombophilia due to protein c deficiency, autosomal recessive; thph4;
NP_000303.1	BGIBMGA009528	0.26	247	6e-11	FBpp0076748	176860 thrombophilia due to protein c deficiency, autosomal dominant; thph3; 612304 thrombophilia due to protein c deficiency, autosomal recessive; thph4;
NP_000303.1	BGIBMGA011362	0.33	120	3e-13	FBpp0085397	176860 thrombophilia due to protein c deficiency, autosomal dominant; thph3; 612304 thrombophilia due to protein c deficiency, autosomal recessive; thph4;
NP_000303.1	BGIBMGA013051	0.26	240	7e-17	FBpp0082362	176860 thrombophilia due to protein c deficiency, autosomal dominant; thph3; 612304 thrombophilia due to protein c deficiency, autosomal recessive; thph4;
NP_005567.2	BGIBMGA010823	0.44	202	1e-49	FBpp0071659	177650 exfoliation syndrome; xfs;
NP_003383.2	BGIBMGA013783	0.58	180	2e-52	FBpp0309792	180700 robinow syndrome, autosomal dominant; drs;
NP_003383.2	BGIBMGA013982	0.59	41	7e-13	FBpp0308474	180700 robinow syndrome, autosomal dominant; drs;
NP_004371.2	BGIBMGA000853	0.67	829	0	FBpp0305701	180849 rubinstein-taybi syndrome 1; rsts1;
EAW85334.1	BGIBMGA001666	0.28	119	3e-06	FBpp0084763	180849 rubinstein-taybi syndrome 1; rsts1;
NP_057653.3	BGIBMGA006719	0.59	74	4e-13	FBpp0303938	181450 ulnar-mammary syndrome; ums;
BAG65418.1	BGIBMGA012897	0.94	54	5e-26	FBpp0301040	181450 ulnar-mammary syndrome; ums;
AAF61207.1	BGIBMGA012898	0.81	83	4e-33	FBpp0289836	181450 ulnar-mammary syndrome; ums;
NP_955468.1	BGIBMGA002891	0.49	258	2e-76	FBpp0303790	182601 spastic paraplegia 4, autosomal dominant; spg4;
NP_055761.2	BGIBMGA005074	0.41	131	4e-16	FBpp0083919	182601 spastic paraplegia 4, autosomal dominant; spg4;
NP_955468.1	BGIBMGA005075	0.64	326	3e-113	FBpp0311932	182601 spastic paraplegia 4, autosomal dominant; spg4;
NP_955468.1	BGIBMGA006243	0.5	227	6e-54	FBpp0309628	182601 spastic paraplegia 4, autosomal dominant; spg4;
NP_955468.1	BGIBMGA007201	0.42	289	5e-54	FBpp0306930	182601 spastic paraplegia 4, autosomal dominant; spg4;
NP_955468.1	BGIBMGA009099	0.38	271	2e-42	FBpp0310207	182601 spastic paraplegia 4, autosomal dominant; spg4;
NP_955468.1	BGIBMGA010271	0.42	324	3e-66	FBpp0306930	182601 spastic paraplegia 4, autosomal dominant; spg4;
NP_001142.2	BGIBMGA002005	0.76	292	8e-119	FBpp0312078	192600 cardiomyopathy, familial hypertrophic, 1; cmh1; 609283 progressive external ophthalmoplegia with mitochondrial dna deletions, autosomal dominant, 2; peoa2;
NP_001142.2	BGIBMGA003829	0.82	252	6e-112	FBpp0312078	192600 cardiomyopathy, familial hypertrophic, 1; cmh1; 609283 progressive external ophthalmoplegia with mitochondrial dna deletions, autosomal dominant, 2; peoa2;
NP_444284.1	BGIBMGA001142	0.29	163	7e-17	FBpp0075807	193300 von hippel-lindau syndrome; vhl; 114500 colorectal cancer; crc;
NP_444284.1	BGIBMGA001198	0.41	268	1e-43	FBpp0289622	193300 von hippel-lindau syndrome; vhl; 114500 colorectal cancer; crc;
NP_444284.1	BGIBMGA001250	0.45	128	6e-25	FBpp0289622	193300 von hippel-lindau syndrome; vhl; 114500 colorectal cancer; crc;
NP_444284.1	BGIBMGA001251	0.35	153	4e-18	FBpp0289622	193300 von hippel-lindau syndrome; vhl; 114500 colorectal cancer; crc;
NP_444284.1	BGIBMGA003747	0.29	160	6e-12	FBpp0071822	193300 von hippel-lindau syndrome; vhl; 114500 colorectal cancer; crc;
AAA52136.1	BGIBMGA003777	0.28	196	5e-11	FBpp0306645	193300 von hippel-lindau syndrome; vhl; 114500 colorectal cancer; crc;
NP_444284.1	BGIBMGA010215	0.27	152	1e-05	FBpp0293192	193300 von hippel-lindau syndrome; vhl; 114500 colorectal cancer; crc;
CAA27765.1	BGIBMGA006692	0.23	716	8e-37	FBpp0305234	193400 von willebrand disease, type 1; vwd1; 613554 von willebrand disease, type 2; vwd2; 277480 von willebrand disease, type 3; vwd3;
CAA27765.1	BGIBMGA006693	0.31	679	1e-104	FBpp0305234	193400 von willebrand disease, type 1; vwd1; 613554 von willebrand disease, type 2; vwd2; 277480 von willebrand disease, type 3; vwd3;
NP_000543.2	BGIBMGA006694	0.24	531	3e-24	FBpp0305234	193400 von willebrand disease, type 1; vwd1; 613554 von willebrand disease, type 2; vwd2; 277480 von willebrand disease, type 3; vwd3;
NP_000543.2	BGIBMGA009075	0.25	177	6e-10	FBpp0296930	193400 von willebrand disease, type 1; vwd1; 613554 von willebrand disease, type 2; vwd2; 277480 von willebrand disease, type 3; vwd3;
NP_000543.2	BGIBMGA009096	0.32	106	9e-10	FBpp0301780	193400 von willebrand disease, type 1; vwd1; 613554 von willebrand disease, type 2; vwd2; 277480 von willebrand disease, type 3; vwd3;
CAA27765.1	BGIBMGA013342	0.26	179	1e-09	FBpp0311464	193400 von willebrand disease, type 1; vwd1; 613554 von willebrand disease, type 2; vwd2; 277480 von willebrand disease, type 3; vwd3;
NP_002461.2	BGIBMGA002056	0.23	311	1e-09	FBpp0077250	193700 arthrogryposis, distal, type 2a; da2a; 601680 arthrogryposis, distal, type 2b; da2b;
CAA31492.1	BGIBMGA008519	0.18	954	1e-12	FBpp0303631	193700 arthrogryposis, distal, type 2a; da2a; 601680 arthrogryposis, distal, type 2b; da2b;
NP_002461.2	BGIBMGA008969	0.19	359	2e-08	FBpp0292047	193700 arthrogryposis, distal, type 2a; da2a; 601680 arthrogryposis, distal, type 2b; da2b;
CAA31492.1	BGIBMGA010645	0.21	463	2e-13	FBpp0297775	193700 arthrogryposis, distal, type 2a; da2a; 601680 arthrogryposis, distal, type 2b; da2b;
NP_002461.2	BGIBMGA010912	0.23	342	6e-07	FBpp0290805	193700 arthrogryposis, distal, type 2a; da2a; 601680 arthrogryposis, distal, type 2b; da2b;
CAA35942.1	BGIBMGA013780	0.25	254	6e-06	FBpp0304727	193700 arthrogryposis, distal, type 2a; da2a; 601680 arthrogryposis, distal, type 2b; da2b;
NP_002461.2	BGIBMGA014170	0.23	206	4e-06	FBpp0112323	193700 arthrogryposis, distal, type 2a; da2a; 601680 arthrogryposis, distal, type 2b; da2b;
NP_150648.2	BGIBMGA002843	0.28	334	6e-33	FBpp0271898	200150 choreoacanthocytosis; chac;
NP_150648.2	BGIBMGA002845	0.3	228	2e-06	FBpp0271898	200150 choreoacanthocytosis; chac;
NP_150648.2	BGIBMGA008117	0.29	2958	0	FBpp0301727	200150 choreoacanthocytosis; chac;
NP_150648.2	BGIBMGA011277	0.24	1462	7e-88	FBpp0301727	200150 choreoacanthocytosis; chac;
NP_150648.2	BGIBMGA014339	0.59	68	2e-17	FBpp0301727	200150 choreoacanthocytosis; chac;
NP_004230.2	BGIBMGA000895	0.21	611	3e-10	FBpp0294057	200600 achondrogenesis, type ia; acg1a;
CAE46015.1	BGIBMGA007515	0.21	757	1e-18	FBpp0112136	200600 achondrogenesis, type ia; acg1a;
NP_004230.2	BGIBMGA007740	0.2	689	9e-17	FBpp0071945	200600 achondrogenesis, type ia; acg1a;
CAA73095.1	BGIBMGA008150	0.22	910	1e-44	FBpp0310129	200600 achondrogenesis, type ia; acg1a;
NP_004230.2	BGIBMGA011644	0.19	490	1e-10	FBpp0075816	200600 achondrogenesis, type ia; acg1a;
CAE46015.1	BGIBMGA011821	0.22	654	8e-19	FBpp0292437	200600 achondrogenesis, type ia; acg1a;
NP_004230.2	BGIBMGA013032	0.2	461	4e-09	FBpp0308521	200600 achondrogenesis, type ia; acg1a;
NP_940927.2	BGIBMGA005777	0.36	316	3e-44	FBpp0312027	200990 acrocallosal syndrome; acls; 614120 hydrolethalus syndrome 2; hls2;
NP_940927.2	BGIBMGA009884	0.38	326	1e-51	FBpp0297760	200990 acrocallosal syndrome; acls; 614120 hydrolethalus syndrome 2; hls2;
NP_940927.2	BGIBMGA010383	0.25	344	5e-20	FBpp0307854	200990 acrocallosal syndrome; acls; 614120 hydrolethalus syndrome 2; hls2;
NP_899050.1	BGIBMGA001823	0.28	110	5e-06	FBpp0086009	201000 carpenter syndrome 1; crpt1;
NP_899050.1	BGIBMGA012644	0.7	124	5e-41	FBpp0078376	201000 carpenter syndrome 1; crpt1;
NP_899050.1	BGIBMGA014349	0.77	52	3e-13	FBpp0078376	201000 carpenter syndrome 1; crpt1;
NP_570901.2	BGIBMGA003180	0.3	386	4e-45	FBpp0112084	201100 acrodermatitis enteropathica, zinc-deficiency type; aez;
NP_998820.3	BGIBMGA006676	0.34	243	1e-30	FBpp0078371	201300 neuropathy, hereditary sensory and autonomic, type iia; hsan2a; 145260 pseudohypoaldosteronism, type iia; pha2a;
NP_998820.3	BGIBMGA013415	0.62	362	2e-131	FBpp0311154	201300 neuropathy, hereditary sensory and autonomic, type iia; hsan2a; 145260 pseudohypoaldosteronism, type iia; pha2a;
NP_000008.1	BGIBMGA006977	0.49	327	2e-78	FBpp0083227	201470 acyl-coa dehydrogenase, short-chain, deficiency of; acadsd;
NP_000008.1	BGIBMGA013140	0.71	396	5e-146	FBpp0083227	201470 acyl-coa dehydrogenase, short-chain, deficiency of; acadsd;
NP_722540.1	BGIBMGA002862	0.38	50	1e-06	FBpp0073974	202370 peroxisome biogenesis disorder 2b; pbd2b; 214100 peroxisome biogenesis disorder 1a (zellweger); pbd1a;
CAG46874.1	BGIBMGA004381	0.28	325	2e-20	FBpp0305589	202370 peroxisome biogenesis disorder 2b; pbd2b; 214100 peroxisome biogenesis disorder 1a (zellweger); pbd1a;
NP_002609.1	BGIBMGA004502	0.4	245	2e-43	FBpp0086874	202370 peroxisome biogenesis disorder 2b; pbd2b; 214100 peroxisome biogenesis disorder 1a (zellweger); pbd1a;
EAW88673.1	BGIBMGA006608	0.33	624	2e-74	FBpp0070352	202370 peroxisome biogenesis disorder 2b; pbd2b; 214100 peroxisome biogenesis disorder 1a (zellweger); pbd1a;
NP_000457.1	BGIBMGA003775	0.3	135	5e-09		202370 peroxisome biogenesis disorder 2b; pbd2b; 266510 peroxisome biogenesis disorder 3b; pbd3b; 214100 peroxisome biogenesis disorder 1a (zellweger); pbd1a;
NP_000457.1	BGIBMGA003776	0.4	407	2e-63	FBpp0075519	202370 peroxisome biogenesis disorder 2b; pbd2b; 266510 peroxisome biogenesis disorder 3b; pbd3b; 214100 peroxisome biogenesis disorder 1a (zellweger); pbd1a;
NP_073207.1	BGIBMGA007917	0.64	107	2e-28	FBpp0071889	202650 agnathia-otocephaly complex; agotc;
NP_000266.2	BGIBMGA011390	0.48	549	5e-132	FBpp0077088	203200 albinism, oculocutaneous, type ii; oca2; 227220 skin/hair/eye pigmentation, variation in, 1; shep1;
NP_000266.2	BGIBMGA011391	0.45	371	2e-74	FBpp0311695	203200 albinism, oculocutaneous, type ii; oca2; 227220 skin/hair/eye pigmentation, variation in, 1; shep1;
NP_000186.2	BGIBMGA011478	0.49	42	3e-07	FBpp0086579	203300 hermansky-pudlak syndrome 1; hps1;
NP_009034.2	BGIBMGA006011	0.86	365	0	FBpp0309828	203450 alexander disease; 256000 leigh syndrome; ls; 252010 mitochondrial complex i deficiency;
NP_009034.2	BGIBMGA006013	0.84	447	0	FBpp0309828	203450 alexander disease; 256000 leigh syndrome; ls; 252010 mitochondrial complex i deficiency;
CAA99340.1	BGIBMGA007324	0.69	439	0	FBpp0079790	203500 alkaptonuria;
NP_002684.1	BGIBMGA009359	0.4	1124	0	FBpp0080148	203700 mitochondrial dna depletion syndrome 4a (alpers type); mtdps4a; 613662 mitochondrial dna depletion syndrome 4b (mngie type); mtdps4b; 607459 sensory ataxic neuropathy, dysarthria, and ophthalmoparesis; sando; 157640 progressive external ophthalmoplegia with mitochondrial dna deletions, autosomal dominant, 1; peoa1; 258450 progressive external ophthalmoplegia with mitochondrial dna deletion…
NP_065970.2	BGIBMGA006009	0.31	1426	1e-178	FBpp0078116	205100 amyotrophic lateral sclerosis 2, juvenile; als2; 606353 primary lateral sclerosis, juvenile; plsj; 607225 spastic paralysis, infantile-onset ascending; iahsp;
NP_003097.1	BGIBMGA003077	0.81	54	6e-19	FBpp0303211	206900 microphthalmia, syndromic 3; mcops3;
NP_003097.1	BGIBMGA003078	0.73	81	6e-30	FBpp0303149	206900 microphthalmia, syndromic 3; mcops3;
NP_003097.1	BGIBMGA003079	0.67	97	5e-30	FBpp0305250	206900 microphthalmia, syndromic 3; mcops3;
NP_003097.1	BGIBMGA003080	0.77	43	5e-14	FBpp0303149	206900 microphthalmia, syndromic 3; mcops3;
NP_003097.1	BGIBMGA003081	0.8	53	2e-19	FBpp0303149	206900 microphthalmia, syndromic 3; mcops3;
NP_003097.1	BGIBMGA006156	0.45	151	2e-23	FBpp0303243	206900 microphthalmia, syndromic 3; mcops3;
NP_071420.1	BGIBMGA005119	0.38	71	2e-08	FBpp0084572	206920 microphthalmia with limb anomalies;
NP_110404.1	BGIBMGA003460	0.34	85	1e-07	FBpp0087179	208050 arterial tortuosity syndrome; ats;
NP_110404.1	BGIBMGA004484	0.26	105	1e-09	FBpp0086060	208050 arterial tortuosity syndrome; ats;
BAG37684.1	BGIBMGA004623	0.27	103	3e-06	FBpp0087179	208050 arterial tortuosity syndrome; ats;
NP_110404.1	BGIBMGA010162	0.27	84	1e-07	FBpp0307732	208050 arterial tortuosity syndrome; ats;
NP_061138.3	BGIBMGA007200	0.28	263	5e-25	FBpp0084210	208085 arthrogryposis, renal dysfunction, and cholestasis 1; arcs1;
NP_061138.3	BGIBMGA008046	0.32	424	1e-55	FBpp0303585	208085 arthrogryposis, renal dysfunction, and cholestasis 1; arcs1;
AAH16445.1	BGIBMGA012868	0.31	109	2e-08	FBpp0303585	208085 arthrogryposis, renal dysfunction, and cholestasis 1; arcs1;
NP_775931.3	BGIBMGA008817	0.35	168	2e-25		208150 fetal akinesia deformation sequence; fads; 254300 myasthenia, limb-girdle, familial;
NP_775931.3	BGIBMGA009089	0.33	127	6e-15	FBpp0078120	208150 fetal akinesia deformation sequence; fads; 254300 myasthenia, limb-girdle, familial;
CAA83954.1	BGIBMGA011177	0.3	379	2e-33	FBpp0088149	208150 fetal akinesia deformation sequence; fads; 608931 myasthenic syndrome, congenital, associated with acetylcholine receptor deficiency;
CAA39288.1	BGIBMGA000866	0.52	249	8e-60	FBpp0308484	208400 aspartylglucosaminuria; agu;
CAA39288.1	BGIBMGA007025	0.29	305	6e-28	FBpp0308748	208400 aspartylglucosaminuria; agu;
NP_778243.1	BGIBMGA009704	0.34	87	3e-06	FBpp0307127	208920 ataxia, early-onset, with oculomotor apraxia and hypoalbuminemia; eaoh; 607426 coenzyme q10 deficiency, primary, 1; coq10d1;
NP_778243.1	BGIBMGA011667	0.37	157	3e-26	FBpp0083174	208920 ataxia, early-onset, with oculomotor apraxia and hypoalbuminemia; eaoh; 607426 coenzyme q10 deficiency, primary, 1; coq10d1;
NP_778243.1	BGIBMGA011899	0.32	86	2e-06	FBpp0099426	208920 ataxia, early-onset, with oculomotor apraxia and hypoalbuminemia; eaoh; 607426 coenzyme q10 deficiency, primary, 1; coq10d1;
NP_004307.2	BGIBMGA001000	0.41	109	2e-11	FBpp0070073	209880 central hypoventilation syndrome, congenital; cchs;
NP_004307.2	BGIBMGA001001	0.4	150	9e-14	FBpp0070073	209880 central hypoventilation syndrome, congenital; cchs;
NP_004307.2	BGIBMGA001148	0.39	127	3e-11	FBpp0070073	209880 central hypoventilation syndrome, congenital; cchs;
NP_004307.2	BGIBMGA012003	0.24	145	1e-06	FBpp0079662	209880 central hypoventilation syndrome, congenital; cchs;
Q2VJ45	BGIBMGA003659	0.35	352	3e-47	FBpp0080722	209880 central hypoventilation syndrome, congenital; cchs; 155240 thyroid carcinoma, familial medullary; mtc; 171400 multiple endocrine neoplasia, type iia; men2a; 162300 multiple endocrine neoplasia, type iib; men2b; 171300 pheochromocytoma; 191830 renal adysplasia; 142623 hirschsprung disease, susceptibility to, 1; hscr1;
NP_066124.1	BGIBMGA003802	0.32	336	2e-34	FBpp0073249	209880 central hypoventilation syndrome, congenital; cchs; 155240 thyroid carcinoma, familial medullary; mtc; 171400 multiple endocrine neoplasia, type iia; men2a; 162300 multiple endocrine neoplasia, type iib; men2b; 171300 pheochromocytoma; 191830 renal adysplasia; 142623 hirschsprung disease, susceptibility to, 1; hscr1;
NP_066124.1	BGIBMGA003976	0.44	296	4e-69	FBpp0084248	209880 central hypoventilation syndrome, congenital; cchs; 155240 thyroid carcinoma, familial medullary; mtc; 171400 multiple endocrine neoplasia, type iia; men2a; 162300 multiple endocrine neoplasia, type iib; men2b; 171300 pheochromocytoma; 191830 renal adysplasia; 142623 hirschsprung disease, susceptibility to, 1; hscr1;
NP_078925.3	BGIBMGA002903	0.34	221	4e-32	FBpp0076621	209900 bardet-biedl syndrome; bbs;
NP_078925.3	BGIBMGA002904	0.39	196	5e-23	FBpp0076621	209900 bardet-biedl syndrome; bbs;
BAF82293.1	BGIBMGA002764	0.42	481	9e-94		209900 bardet-biedl syndrome; bbs;
NP_114091.3	BGIBMGA002765	0.37	68	5e-08		209900 bardet-biedl syndrome; bbs;
BAG61027.1	BGIBMGA006705	0.22	333	1e-07	FBpp0074918	209900 bardet-biedl syndrome; bbs;
ABM85635.1	BGIBMGA011069	0.22	344	2e-09	FBpp0072562	209900 bardet-biedl syndrome; bbs;
NP_689597.1	BGIBMGA008712	0.5	336	1e-92	FBpp0078512	209900 bardet-biedl syndrome; bbs;
ABM87809.1	BGIBMGA000949	0.26	208	6e-15		209900 bardet-biedl syndrome; bbs;
NP_940820.1	BGIBMGA006911	0.3	400	3e-45	FBpp0289682	209900 bardet-biedl syndrome; bbs;
NP_001175.2	BGIBMGA007036	0.35	1490	0	FBpp0074047	210600 seckel syndrome 1; sckl1;
NP_001175.2	BGIBMGA008924	0.25	835	3e-62	FBpp0080003	210600 seckel syndrome 1; sckl1;
NP_001175.2	BGIBMGA008952	0.25	952	4e-70	FBpp0307598	210600 seckel syndrome 1; sckl1;
NP_001175.2	BGIBMGA011978	0.33	269	3e-33	FBpp0309979	210600 seckel syndrome 1; sckl1;
BAA23698.3	BGIBMGA009083	0.25	263	2e-09	FBpp0307614	210720 microcephalic osteodysplastic primordial dwarfism, type ii; mopd2;
NP_006022.3	BGIBMGA010953	0.22	232	1e-06	FBpp0297121	210720 microcephalic osteodysplastic primordial dwarfism, type ii; mopd2;
AAI43281.1	BGIBMGA005666	0.36	564	4e-92	FBpp0081910	210900 bloom syndrome; blm;
NP_000048.1	BGIBMGA009286	0.21	330	1e-08	FBpp0087645	210900 bloom syndrome; blm;
BAG36927.1	BGIBMGA010637	0.37	430	4e-68	FBpp0075458	210900 bloom syndrome; blm;
BAG36927.1	BGIBMGA010673	0.24	333	3e-10	FBpp0079566	210900 bloom syndrome; blm;
BAG36927.1	BGIBMGA011746	0.23	334	3e-10	FBpp0291159	210900 bloom syndrome; blm;
BAG36927.1	BGIBMGA011754	0.25	332	2e-12	FBpp0310551	210900 bloom syndrome; blm;
BAG36927.1	BGIBMGA012013	0.24	357	6e-09	FBpp0305296	210900 bloom syndrome; blm;
NP_000048.1	BGIBMGA012404	0.48	432	2e-117	FBpp0081910	210900 bloom syndrome; blm;
NP_212134.3	BGIBMGA005862	0.41	235	2e-40	FBpp0085211	211530 brown-vialetto-van laere syndrome 1; bvvls1; 211500 fazio-londe disease;
CAA63371.1	BGIBMGA010523	0.38	500	9e-85	FBpp0311917	211900 tumoral calcinosis, hyperphosphatemic, familial; hftc;
NP_004473.2	BGIBMGA014556	0.4	265	3e-47	FBpp0292961	211900 tumoral calcinosis, hyperphosphatemic, familial; hftc;
NP_000294.1	BGIBMGA005687	0.54	237	1e-73	FBpp0075693	212065 congenital disorder of glycosylation, type ia; cdg1a;
BAG52082.1	BGIBMGA001608	0.4	324	8e-85	FBpp0306759	212066 congenital disorder of glycosylation, type iia; cdg2a;
BAG51330.1	BGIBMGA010665	0.24	519	1e-34	FBpp0079886	212720 martsolf syndrome;
AAI36669.1	BGIBMGA001256	0.45	1590	0	FBpp0290880	212780 cenani-lenz syndactyly syndrome; clss;
NP_002325.2	BGIBMGA005876	0.28	651	1e-50	FBpp0308545	212780 cenani-lenz syndactyly syndrome; clss;
NP_002325.2	BGIBMGA014160	0.43	125	2e-23	FBpp0310028	212780 cenani-lenz syndactyly syndrome; clss;
NP_002325.2	BGIBMGA014161	0.26	543	4e-38	FBpp0073715	212780 cenani-lenz syndactyly syndrome; clss;
NP_063945.2	BGIBMGA005398	0.43	73	1e-09	FBpp0297529	213300 joubert syndrome 1; jbts1; 610156 mental retardation, truncal obesity, retinal dystrophy, and micropenis;
NP_063945.2	BGIBMGA007291	0.42	289	6e-56	FBpp0305548	213300 joubert syndrome 1; jbts1; 610156 mental retardation, truncal obesity, retinal dystrophy, and micropenis;
NP_063945.2	BGIBMGA007292	0.45	73	2e-11	FBpp0305548	213300 joubert syndrome 1; jbts1; 610156 mental retardation, truncal obesity, retinal dystrophy, and micropenis;
NP_000775.1	BGIBMGA000368	0.26	469	4e-37	FBpp0073061	213700 cerebrotendinous xanthomatosis; ctx;
AAO21126.1	BGIBMGA001276	0.28	383	6e-39	FBpp0083144	213700 cerebrotendinous xanthomatosis; ctx;
NP_000775.1	BGIBMGA004097	0.36	170	5e-28	FBpp0293134	213700 cerebrotendinous xanthomatosis; ctx;
NP_001180573.1	BGIBMGA011144	0.35	207	2e-27	FBpp0309544	214100 peroxisome biogenesis disorder 1a (zellweger); pbd1a;
NP_004556.1	BGIBMGA014129	0.26	218	8e-12	FBpp0077909	214100 peroxisome biogenesis disorder 1a (zellweger); pbd1a;
NP_003621.1	BGIBMGA010225	0.32	366	2e-49	FBpp0304214	214100 peroxisome biogenesis disorder 1a (zellweger); pbd1a;
NP_001135967.1	BGIBMGA009779	0.49	1113	0	FBpp0088686	214450 griscelli syndrome, type 1; gs1;
NP_001135967.1	BGIBMGA009780	0.31	400	9e-49	FBpp0088686	214450 griscelli syndrome, type 1; gs1;
NP_000072.2	BGIBMGA005835	0.29	172	4e-10		214500 chediak-higashi syndrome; chs;
NP_000072.2	BGIBMGA005837	0.38	708	2e-113	FBpp0293022	214500 chediak-higashi syndrome; chs;
NP_000072.2	BGIBMGA010373	0.37	586	2e-97	FBpp0078775	214500 chediak-higashi syndrome; chs;
NP_036563.1	BGIBMGA003697	0.3	508	3e-58	FBpp0291371	214800 charge syndrome;
NP_036563.1	BGIBMGA004093	0.3	465	1e-57	FBpp0292882	214800 charge syndrome;
NP_036563.1	BGIBMGA008511	0.37	231	3e-35	FBpp0311494	214800 charge syndrome;
NP_036563.1	BGIBMGA008512	0.26	164	1e-05	FBpp0311494	214800 charge syndrome;
NP_036563.1	BGIBMGA010124	0.33	434	5e-50	FBpp0289568	214800 charge syndrome;
BAD96554.1	BGIBMGA011439	0.28	338	5e-35	FBpp0071630	215140 hydrops-ectopic calcification-moth-eaten skeletal dysplasia; 169400 pelger-huet anomaly; pha; 613471 reynolds syndrome;
NP_000073.1	BGIBMGA010495	0.22	222	8e-07	FBpp0087402	216400 cockayne syndrome a; csa;
NP_858047.2	BGIBMGA003852	0.47	188	5e-43	FBpp0290049	216550 cohen syndrome; coh1;
NP_001289.1	BGIBMGA000577	0.6	435	1e-144	FBpp0292051	216900 achromatopsia 2; achm2;
NP_001289.1	BGIBMGA006352	0.24	139	9e-09	FBpp0292051	216900 achromatopsia 2; achm2;
NP_001289.1	BGIBMGA007588	0.63	176	2e-60	FBpp0288848	216900 achromatopsia 2; achm2;
NP_001073347.1	BGIBMGA013257	0.34	176	4e-19	FBpp0300628	216900 achromatopsia 2; achm2;
NP_001289.1	BGIBMGA013258	0.44	246	5e-57	FBpp0300628	216900 achromatopsia 2; achm2;
AAH60513.1	BGIBMGA000385	0.39	189	2e-27	FBpp0312168	217090 plasminogen deficiency, type i;
NP_000292.1	BGIBMGA009694	0.35	242	5e-36	FBpp0087747	217090 plasminogen deficiency, type i;
AAH60513.1	BGIBMGA014407	0.37	203	7e-24	FBpp0311172	217090 plasminogen deficiency, type i;
NP_542378.1	BGIBMGA013132	0.72	197	3e-81	FBpp0311870	217095 conotruncal heart malformations; cthm; 188400 digeorge syndrome; dgs; 192430 velocardiofacial syndrome;
NP_598408.1	BGIBMGA003629	0.57	551	4e-158	FBpp0072048	218000 agenesis of the corpus callosum with peripheral neuropathy; accpn;
NP_598408.1	BGIBMGA003630	0.57	456	1e-140	FBpp0072048	218000 agenesis of the corpus callosum with peripheral neuropathy; accpn;
NP_598408.1	BGIBMGA004574	0.3	361	8e-28	FBpp0310379	218000 agenesis of the corpus callosum with peripheral neuropathy; accpn;
NP_789765.1	BGIBMGA003980	0.57	120	1e-35	FBpp0289803	218040 costello syndrome; 109800 bladder cancer; 188470 thyroid carcinoma, follicular; ftc;
NP_005334.1	BGIBMGA009918	0.55	166	2e-49	FBpp0070559	218040 costello syndrome; 109800 bladder cancer; 188470 thyroid carcinoma, follicular; ftc;
NP_789765.1	BGIBMGA012832	0.27	109	6e-06	FBpp0306785	218040 costello syndrome; 109800 bladder cancer; 188470 thyroid carcinoma, follicular; ftc;
NP_060732.2	BGIBMGA000477	0.44	386	3e-92	FBpp0311288	218330 cranioectodermal dysplasia 1; ced1;
BAA91888.1	BGIBMGA000478	0.36	530	2e-97	FBpp0311288	218330 cranioectodermal dysplasia 1; ced1;
NP_004251.3	BGIBMGA008914	0.21	349	2e-11	FBpp0073828	218600 baller-gerold syndrome; bgs; 266280 rapadilino syndrome; 268400 rothmund-thomson syndrome; rts;
NP_004251.3	BGIBMGA009903	0.28	125	7e-06	FBpp0076003	218600 baller-gerold syndrome; bgs; 266280 rapadilino syndrome; 268400 rothmund-thomson syndrome; rts;
NP_004251.3	BGIBMGA010259	0.23	369	4e-10	FBpp0112117	218600 baller-gerold syndrome; bgs; 266280 rapadilino syndrome; 268400 rothmund-thomson syndrome; rts;
EAW82071.1	BGIBMGA011784	0.35	537	3e-95	FBpp0076452	218600 baller-gerold syndrome; bgs; 266280 rapadilino syndrome; 268400 rothmund-thomson syndrome; rts;
NP_079350.5	BGIBMGA001620	0.24	250	2e-08	FBpp0081176	219000 fraser syndrome;
NP_079350.5	BGIBMGA002849	0.28	191	7e-13	FBpp0079918	219000 fraser syndrome;
NP_997244.3	BGIBMGA004794	0.27	212	4e-15	FBpp0310709	219000 fraser syndrome;
EAX08608.1	BGIBMGA012237	0.23	1262	6e-40	FBpp0304601	219000 fraser syndrome;
ADZ16096.1	BGIBMGA000222	0.46	345	1e-79	FBpp0310702	219900 cystinosis, late-onset juvenile or adolescent nephropathic type; 219800 cystinosis, nephropathic; ctns; 219750 cystinosis, adult nonnephropathic;
NP_001854.1	BGIBMGA004650	0.4	77	3e-16	FBpp0300889	220110 mitochondrial complex iv deficiency;
NP_573566.2	BGIBMGA003578	0.22	828	2e-60	FBpp0070221	220111 leigh syndrome, french canadian type; lsfc;
NP_573566.2	BGIBMGA010538	0.36	422	8e-73	FBpp0080637	220111 leigh syndrome, french canadian type; lsfc;
NP_660305.2	BGIBMGA000827	0.43	424	2e-80	FBpp0307439	220120 d-glyceric aciduria;
NP_004516.2	BGIBMGA003646	0.39	98	5e-16	FBpp0307459	222448 donnai-barrow syndrome;
NP_004516.2	BGIBMGA006213	0.29	115	4e-07	FBpp0305995	222448 donnai-barrow syndrome;
NP_004516.2	BGIBMGA006214	0.25	209	4e-09	FBpp0291540	222448 donnai-barrow syndrome;
AAB41649.1	BGIBMGA011982	0.38	4344	0	FBpp0310028	222448 donnai-barrow syndrome;
NP_004516.2	BGIBMGA012239	0.3	122	1e-13	FBpp0309662	222448 donnai-barrow syndrome;
NP_004516.2	BGIBMGA014163	0.32	294	9e-37	FBpp0073715	222448 donnai-barrow syndrome;
NP_001376.1	BGIBMGA005717	0.59	395	8e-131	FBpp0112945	222748 dihydropyrimidinase deficiency;
NP_001376.1	BGIBMGA006812	0.24	441	7e-09	FBpp0309961	222748 dihydropyrimidinase deficiency;
NP_055051.1	BGIBMGA005057	0.44	243	1e-54	FBpp0303401	222765 rhizomelic chondrodysplasia punctata, type 2; rcdp2;
NP_055051.1	BGIBMGA010829	0.32	231	1e-27	FBpp0307019	222765 rhizomelic chondrodysplasia punctata, type 2; rcdp2;
NP_000778.3	BGIBMGA002587	0.27	259	3e-13	FBpp0072112	223360 dopamine beta-hydroxylase deficiency, congenital;
NP_000778.3	BGIBMGA005287	0.42	234	8e-46	FBpp0309355	223360 dopamine beta-hydroxylase deficiency, congenital;
NP_000778.3	BGIBMGA014548	0.37	176	2e-30	FBpp0305776	223360 dopamine beta-hydroxylase deficiency, congenital;
EAW62936.1	BGIBMGA009660	0.37	655	1e-106	FBpp0087755	223800 dyggve-melchior-clausen disease; dmc; 607326 smith-mccort dysplasia 1; smc1;
AAC64258.1	BGIBMGA001538	0.31	493	2e-61	FBpp0307425	223900 neuropathy, hereditary sensory and autonomic, type iii; hsan3;
NP_003374.3	BGIBMGA002661	0.45	717	0	FBpp0290685	224050 cerebellar ataxia, mental retardation, and dysequilibrium syndrome 1; camrq1;
NP_003374.3	BGIBMGA012215	0.35	189	4e-29	FBpp0082798	224050 cerebellar ataxia, mental retardation, and dysequilibrium syndrome 1; camrq1;
NP_005520.4	BGIBMGA003750	0.3	114	2e-09	FBpp0305929	224410 dyssegmental dysplasia, silverman-handmaker type; ddsh; 255800 schwartz-jampel syndrome, type 1; sjs1;
EAW94997.1	BGIBMGA012240	0.27	2535	0	FBpp0309657	224410 dyssegmental dysplasia, silverman-handmaker type; ddsh; 255800 schwartz-jampel syndrome, type 1; sjs1;
CAA44373.1	BGIBMGA013733	0.29	215	2e-12	FBpp0112310	224410 dyssegmental dysplasia, silverman-handmaker type; ddsh; 255800 schwartz-jampel syndrome, type 1; sjs1;
NP_005520.4	BGIBMGA013755	0.23	178	7e-06	FBpp0311190	224410 dyssegmental dysplasia, silverman-handmaker type; ddsh; 255800 schwartz-jampel syndrome, type 1; sjs1;
NP_005520.4	BGIBMGA013906	0.36	169	2e-13	FBpp0309033	224410 dyssegmental dysplasia, silverman-handmaker type; ddsh; 255800 schwartz-jampel syndrome, type 1; sjs1;
NP_005520.4	BGIBMGA013907	0.28	422	1e-33	FBpp0309033	224410 dyssegmental dysplasia, silverman-handmaker type; ddsh; 255800 schwartz-jampel syndrome, type 1; sjs1;
NP_004144.2	BGIBMGA002754	0.47	358	7e-83	FBpp0088033	224690 meier-gorlin syndrome 1; mgors1;
NP_079284.2	BGIBMGA001906	0.29	326	3e-35	FBpp0293074	225100 ectopia lentis 2, isolated, autosomal recessive; ectol2;
NP_061905.2	BGIBMGA001913	0.28	514	9e-38	FBpp0293074	225100 ectopia lentis 2, isolated, autosomal recessive; ectol2;
AAI44582.1	BGIBMGA005129	0.32	625	1e-91	FBpp0291053	225100 ectopia lentis 2, isolated, autosomal recessive; ectol2;
NP_061905.2	BGIBMGA005633	0.25	356	6e-14		225100 ectopia lentis 2, isolated, autosomal recessive; ectol2;
NP_067610.1	BGIBMGA002474	0.34	248	8e-25	FBpp0290306	225410 ehlers-danlos syndrome, type vii, autosomal recessive;
NP_055059.2	BGIBMGA002475	0.24	243	1e-13	FBpp0290305	225410 ehlers-danlos syndrome, type vii, autosomal recessive;
NP_338599.1	BGIBMGA000125	0.36	157	2e-16	FBpp0310346	225750 aicardi-goutieres syndrome 1; ags1; 610448 chilblain lupus 1; chbl1; 192315 vasculopathy, retinal, with cerebral leukodystrophy; rvcl; 152700 systemic lupus erythematosus; sle;
NP_338599.1	BGIBMGA013676	0.25	222	9e-17	FBpp0310346	225750 aicardi-goutieres syndrome 1; ags1; 610448 chilblain lupus 1; chbl1; 192315 vasculopathy, retinal, with cerebral leukodystrophy; rvcl; 152700 systemic lupus erythematosus; sle;
NP_060261.2	BGIBMGA012097	0.48	265	2e-59	FBpp0292379	225790 proliferative vasculopathy and hydranencephaly-hydrocephaly syndrome; pvhh;
NP_060261.2	BGIBMGA013528	0.54	206	4e-54	FBpp0292379	225790 proliferative vasculopathy and hydranencephaly-hydrocephaly syndrome; pvhh;
NP_000485.3	BGIBMGA012067	0.39	260	2e-30	FBpp0078642	226650 epidermolysis bullosa, junctional, non-herlitz type;
NP_937762.1	BGIBMGA002018	0.33	1499	0	FBpp0076722	226650 epidermolysis bullosa, junctional, non-herlitz type; 226700 epidermolysis bullosa, junctional, herlitz type; 245660 laryngoonychocutaneous syndrome; locs;
BAG59130.1	BGIBMGA010454	0.28	410	4e-28	FBpp0086503	226730 epidermolysis bullosa junctionalis with pyloric atresia;
NP_004827.4	BGIBMGA004872	0.34	203	1e-23	FBpp0306618	226980 epiphyseal dysplasia, multiple, with early-onset diabetes mellitus;
NP_004827.4	BGIBMGA006037	0.29	190	1e-21	FBpp0306619	226980 epiphyseal dysplasia, multiple, with early-onset diabetes mellitus;
NP_004827.4	BGIBMGA008626	0.39	295	2e-35	FBpp0303060	226980 epiphyseal dysplasia, multiple, with early-onset diabetes mellitus;
NP_004827.4	BGIBMGA011283	0.27	212	2e-06	FBpp0084711	226980 epiphyseal dysplasia, multiple, with early-onset diabetes mellitus;
NP_004616.2	BGIBMGA006145	0.31	122	1e-19	FBpp0306845	228930 fibular aplasia or hypoplasia, femoral bowing and poly-, syn-, and oligodactyly; 276820 ulna and fibula, absence of, with severe limb deficiency;
NP_004616.2	BGIBMGA006148	0.45	90	2e-20	FBpp0292305	228930 fibular aplasia or hypoplasia, femoral bowing and poly-, syn-, and oligodactyly; 276820 ulna and fibula, absence of, with severe limb deficiency;
NP_004616.2	BGIBMGA013981	0.48	272	4e-72	FBpp0308474	228930 fibular aplasia or hypoplasia, femoral bowing and poly-, syn-, and oligodactyly; 276820 ulna and fibula, absence of, with severe limb deficiency;
NP_542400.2	BGIBMGA000671	0.27	163	3e-07	FBpp0289881	229050 folate malabsorption, hereditary;
NP_542400.2	BGIBMGA007020	0.26	198	4e-06	FBpp0083412	229050 folate malabsorption, hereditary;
NP_542400.2	BGIBMGA010933	0.22	207	1e-06	FBpp0308816	229050 folate malabsorption, hereditary;
NP_001229295.1	BGIBMGA010934	0.21	337	5e-08	FBpp0308816	229050 folate malabsorption, hereditary;
NP_542400.2	BGIBMGA010937	0.25	152	5e-06	FBpp0308816	229050 folate malabsorption, hereditary;
NP_542400.2	BGIBMGA010938	0.25	160	7e-06	FBpp0308816	229050 folate malabsorption, hereditary;
NP_542400.2	BGIBMGA014434	0.22	343	3e-10	FBpp0087664	229050 folate malabsorption, hereditary;
NP_000135.2	BGIBMGA008044	0.54	107	4e-26	FBpp0071283	229300 friedreich ataxia 1; frda;
NP_000138.2	BGIBMGA006905	0.52	428	7e-138	FBpp0100046	230000 fucosidosis;
NP_000145.1	BGIBMGA002718	0.3	242	2e-12	FBpp0292326	230200 galactokinase deficiency;
NP_000145.1	BGIBMGA005670	0.45	112	2e-20	FBpp0292326	230200 galactokinase deficiency;
ABW03633.1	BGIBMGA009249	0.55	323	8e-73	FBpp0297132	230200 galactokinase deficiency;
AAB86498.1	BGIBMGA001383	0.58	344	1e-109	FBpp0297771	230350 galactose epimerase deficiency;
AAB86498.1	BGIBMGA001865	0.56	218	5e-73	FBpp0297771	230350 galactose epimerase deficiency;
AAB86498.1	BGIBMGA007768	0.27	247	7e-11	FBpp0076413	230350 galactose epimerase deficiency;
AAC83409.1	BGIBMGA001613	0.6	340	7e-102	FBpp0305544	230400 galactosemia;
BAD96811.1	BGIBMGA006815	0.42	601	8e-124	FBpp0081961	230500 gm1-gangliosidosis, type i; 230600 gm1-gangliosidosis, type ii; 230650 gm1-gangliosidosis, type iii; 253010 mucopolysaccharidosis type ivb;
NP_056480.1	BGIBMGA007431	0.33	441	1e-69	FBpp0071254	231550 achalasia-addisonianism-alacrima syndrome; aaas;
AAC52079.1	BGIBMGA005444	0.63	367	2e-138	FBpp0078893	231670 glutaric acidemia i;
ADR83154.1	BGIBMGA009712	0.29	178	3e-11	FBpp0111930	232200 glycogen storage disease ia;
NP_001458.1	BGIBMGA011231	0.29	148	2e-09	FBpp0309685	232220 glycogen storage disease ib; 232240 glycogen storage disease ic;
ABI53718.1	BGIBMGA000132	0.33	583	4e-78	FBpp0070058	232300 glycogen storage disease ii;
NP_001073272.1	BGIBMGA001568	0.22	278	7e-07		232300 glycogen storage disease ii;
NP_001073272.1	BGIBMGA007153	0.25	421	5e-16	FBpp0084221	232300 glycogen storage disease ii;
ABI53718.1	BGIBMGA007199	0.23	400	2e-12	FBpp0084221	232300 glycogen storage disease ii;
NP_001073272.1	BGIBMGA012077	0.4	868	0	FBpp0070058	232300 glycogen storage disease ii;
NP_001073272.1	BGIBMGA013995	0.24	537	1e-23	FBpp0070058	232300 glycogen storage disease ii;
BAD92104.1	BGIBMGA010888	0.38	909	8e-159	FBpp0071526	232400 glycogen storage disease iii;
NP_055610.1	BGIBMGA002551	0.65	102	3e-32	FBpp0085063	235730 mowat-wilson syndrome; mows;
NP_001171480.1	BGIBMGA000065	0.52	317	1e-82	FBpp0309380	236200 homocystinuria due to cystathionine beta-synthase deficiency;
NP_001171480.1	BGIBMGA004935	0.44	299	1e-69	FBpp0309380	236200 homocystinuria due to cystathionine beta-synthase deficiency;
NP_001171480.1	BGIBMGA005174	0.64	161	7e-52	FBpp0309380	236200 homocystinuria due to cystathionine beta-synthase deficiency;
NP_001171480.1	BGIBMGA012123	0.35	273	1e-31	FBpp0309380	236200 homocystinuria due to cystathionine beta-synthase deficiency;
NP_076915.2	BGIBMGA011007	0.33	425	1e-56	FBpp0307944	236270 homocystinuria-megaloblastic anemia, cble complementation type; hmae; 601634 neural tube defects, folate-sensitive;
BAD92667.1	BGIBMGA003152	0.46	396	4e-105	FBpp0075877	236670 muscular dystrophy-dystroglycanopathy (congenital with brain and eye anomalies), type a, 1; mddga1; 613155 muscular dystrophy-dystroglycanopathy (congenital with mental retardation), type b, 1; mddgb1; 609308 muscular dystrophy-dystroglycanopathy (limb-girdle), type c, 1; mddgc1;
NP_009102.3	BGIBMGA003367	0.3	190	5e-07	FBpp0078450	236670 muscular dystrophy-dystroglycanopathy (congenital with brain and eye anomalies), type a, 1; mddga1; 613155 muscular dystrophy-dystroglycanopathy (congenital with mental retardation), type b, 1; mddgb1; 609308 muscular dystrophy-dystroglycanopathy (limb-girdle), type c, 1; mddgc1;
AAI12357.1	BGIBMGA000620	0.33	389	2e-55		236730 urofacial syndrome 1; ufs1;
NP_068600.4	BGIBMGA010770	0.24	393	2e-11	FBpp0083001	236730 urofacial syndrome 1; ufs1;
NP_079160.1	BGIBMGA010578	0.52	371	2e-103	FBpp0309285	236792 l-2-hydroxyglutaric aciduria;
NP_003184.1	BGIBMGA000149	0.34	518	5e-59	FBpp0307274	241410 hypoparathyroidism-retardation-dysmorphism syndrome; hrd; 244460 kenny-caffey syndrome, type 1; kcs1;
BAH12714.1	BGIBMGA001363	0.44	63	7e-09	FBpp0077308	241410 hypoparathyroidism-retardation-dysmorphism syndrome; hrd; 244460 kenny-caffey syndrome, type 1; kcs1;
NP_003184.1	BGIBMGA002782	0.24	229	2e-06	FBpp0082877	241410 hypoparathyroidism-retardation-dysmorphism syndrome; hrd; 244460 kenny-caffey syndrome, type 1; kcs1;
NP_003184.1	BGIBMGA008544	0.25	186	6e-12	FBpp0304278	241410 hypoparathyroidism-retardation-dysmorphism syndrome; hrd; 244460 kenny-caffey syndrome, type 1; kcs1;
NP_000350.1	BGIBMGA001976	0.37	594	6e-115	FBpp0079156	242100 ichthyosis, congenital, autosomal recessive 2; arci2; 242300 ichthyosis, congenital, autosomal recessive 1; arci1;
BAF98719.1	BGIBMGA003170	0.36	594	3e-115	FBpp0079156	242100 ichthyosis, congenital, autosomal recessive 2; arci2; 242300 ichthyosis, congenital, autosomal recessive 1; arci1;
BAF84039.1	BGIBMGA003171	0.36	692	5e-111	FBpp0079156	242100 ichthyosis, congenital, autosomal recessive 2; arci2; 242300 ichthyosis, congenital, autosomal recessive 1; arci1;
NP_054859.2	BGIBMGA009112	0.39	529	3e-84	FBpp0078631	242900 immunoosseous dysplasia, schimke type;
NP_777576.1	BGIBMGA009222	0.35	249	2e-32	FBpp0312009	243800 johanson-blizzard syndrome; jbs;
NP_777576.1	BGIBMGA009223	0.37	458	3e-62	FBpp0312009	243800 johanson-blizzard syndrome; jbs;
NP_036276.1	BGIBMGA001942	0.38	690	2e-134	FBpp0309629	244400 ciliary dyskinesia, primary, 1; cild1;
BAF83385.1	BGIBMGA002375	0.26	398	3e-18	FBpp0088424	244400 ciliary dyskinesia, primary, 1; cild1;
BAF83385.1	BGIBMGA006633	0.22	490	3e-33	FBpp0072685	244400 ciliary dyskinesia, primary, 1; cild1;
BAF83385.1	BGIBMGA012166	0.21	356	5e-07		244400 ciliary dyskinesia, primary, 1; cild1;
AAQ08887.1	BGIBMGA004421	0.3	251	4e-21	FBpp0071698	245010 haim-munk syndrome; hms; 245000 papillon-lefevre syndrome; pals; 170650 periodontitis, aggressive, 1;
NP_001805.3	BGIBMGA007061	0.31	286	2e-29	FBpp0311925	245010 haim-munk syndrome; hms; 245000 papillon-lefevre syndrome; pals; 170650 periodontitis, aggressive, 1;
BAG59614.1	BGIBMGA003815	0.28	336	6e-30	FBpp0081834	245348 pyruvate dehydrogenase e2 deficiency; pdhdd;
NP_001922.2	BGIBMGA008983	0.46	233	4e-32	FBpp0304797	245348 pyruvate dehydrogenase e2 deficiency; pdhdd;
NP_001922.2	BGIBMGA008984	0.54	139	3e-38	FBpp0304797	245348 pyruvate dehydrogenase e2 deficiency; pdhdd;
NP_003468.2	BGIBMGA005113	0.33	225	8e-25	FBpp0081834	245349 pyruvate dehydrogenase e3-binding protein deficiency; pdhxd;
NP_003840.2	BGIBMGA010120	0.72	304	3e-112	FBpp0292215	245400 mitochondrial dna depletion syndrome 9 (encephalomyopathic type with methylmalonic aciduria); mtdps9;
NP_003840.2	BGIBMGA012780	0.72	304	3e-112	FBpp0292215	245400 mitochondrial dna depletion syndrome 9 (encephalomyopathic type with methylmalonic aciduria); mtdps9;
NP_036332.2	BGIBMGA008529	0.48	231	1e-55	FBpp0070612	245600 multiple joint dislocations, short stature, craniofacial dysmorphism, and congenital heart defects;
NP_036332.2	BGIBMGA012266	0.43	244	3e-43	FBpp0079439	245600 multiple joint dislocations, short stature, craniofacial dysmorphism, and congenital heart defects;
NP_976035.1	BGIBMGA004913	0.54	331	2e-95	FBpp0078633	248390 treacher collins syndrome 3; tcs3;
NP_976035.1	BGIBMGA004994	0.34	188	1e-20	FBpp0080121	248390 treacher collins syndrome 3; tcs3;
BAF84261.1	BGIBMGA001695	0.31	566	1e-66	FBpp0079621	248500 mannosidosis, alpha b, lysosomal; mansa;
AAC50812.1	BGIBMGA001727	0.4	287	5e-53	FBpp0079621	248500 mannosidosis, alpha b, lysosomal; mansa;
NP_001166969.1	BGIBMGA001728	0.31	400	3e-49	FBpp0079621	248500 mannosidosis, alpha b, lysosomal; mansa;
AAC50812.1	BGIBMGA005142	0.27	784	6e-67	FBpp0306417	248500 mannosidosis, alpha b, lysosomal; mansa;
AAC50812.1	BGIBMGA011378	0.34	596	3e-91	FBpp0079620	248500 mannosidosis, alpha b, lysosomal; mansa;
NP_001166969.1	BGIBMGA012267	0.24	792	4e-55	FBpp0311424	248500 mannosidosis, alpha b, lysosomal; mansa;
NP_001166969.1	BGIBMGA012324	0.27	243	5e-14	FBpp0311424	248500 mannosidosis, alpha b, lysosomal; mansa;
AAC50811.1	BGIBMGA014566	0.58	283	3e-97	FBpp0079621	248500 mannosidosis, alpha b, lysosomal; mansa;
AAC39573.1	BGIBMGA004998	0.37	842	4e-156	FBpp0297164	248510 mannosidosis, beta a, lysosomal; mansb;
NP_015565.1	BGIBMGA001152	0.58	232	3e-78	FBpp0291346	250800 methemoglobinemia due to deficiency of methemoglobin reductase;
NP_015565.1	BGIBMGA004702	0.28	161	9e-09	FBpp0312183	250800 methemoglobinemia due to deficiency of methemoglobin reductase;
AAA52307.1	BGIBMGA009014	0.29	150	2e-09	FBpp0085713	250800 methemoglobinemia due to deficiency of methemoglobin reductase;
NP_000420.1	BGIBMGA012515	0.71	378	3e-158	FBpp0088926	250850 methionine adenosyltransferase deficiency;
NP_000245.2	BGIBMGA004208	0.25	310	1e-10	FBpp0309710	250940 homocystinuria-megaloblastic anemia, cblg complementation type; hmag; 190685 down syndrome; 601634 neural tube defects, folate-sensitive;
NP_001689.1	BGIBMGA004489	0.29	198	2e-17	FBpp0082063	250950 3-methylglutaconic aciduria, type i; mgca1;
NP_001689.1	BGIBMGA005528	0.52	253	3e-63	FBpp0086993	250950 3-methylglutaconic aciduria, type i; mgca1;
NP_001689.1	BGIBMGA005656	0.39	253	2e-39	FBpp0086769	250950 3-methylglutaconic aciduria, type i; mgca1;
ABM86153.1	BGIBMGA008189	0.29	160	8e-13	FBpp0070006	250950 3-methylglutaconic aciduria, type i; mgca1;
NP_001689.1	BGIBMGA011639	0.28	167	3e-08	FBpp0304781	250950 3-methylglutaconic aciduria, type i; mgca1;
NP_620148.1	BGIBMGA007005	0.46	364	6e-90	FBpp0308466	251450 desbuquois dysplasia; dbqd;
NP_077025.2	BGIBMGA011394	0.56	142	1e-39	FBpp0303475	252010 mitochondrial complex i deficiency;
NP_004541.1	BGIBMGA002989	0.59	412	8e-139	FBpp0305832	252010 mitochondrial complex i deficiency;
NP_066552.2	BGIBMGA003691	0.55	166	2e-48	FBpp0309486	252010 mitochondrial complex i deficiency;
NP_054884.1	BGIBMGA004494	0.37	170	3e-23	FBpp0081683	252010 mitochondrial complex i deficiency;
CAA43412.1	BGIBMGA005568	0.49	715	0	FBpp0071129	252010 mitochondrial complex i deficiency;
NP_079428.2	BGIBMGA006973	0.34	214	4e-34	FBpp0077868	252010 mitochondrial complex i deficiency;
NP_079428.2	BGIBMGA007944	0.5	268	5e-66	FBpp0306285	252010 mitochondrial complex i deficiency;
NP_004997.4	BGIBMGA008957	0.62	720	0	FBpp0071129	252010 mitochondrial complex i deficiency;
NP_004541.1	BGIBMGA011131	0.78	412	0	FBpp0305832	252010 mitochondrial complex i deficiency;
CAG33209.1	BGIBMGA011870	0.61	245	1e-83	FBpp0309486	252010 mitochondrial complex i deficiency;
NP_783313.1	BGIBMGA012632	0.33	129	3e-13	FBpp0071459	252010 mitochondrial complex i deficiency;
NP_079428.2	BGIBMGA014474	0.39	231	9e-42	FBpp0080448	252010 mitochondrial complex i deficiency;
BAD96393.1	BGIBMGA012072	0.41	536	5e-99	FBpp0074720	252650 mucolipidosis iv;
NP_000190.1	BGIBMGA005529	0.56	415	2e-136	FBpp0083138	252900 mucopolysaccharidosis type iiia;
AAC50513.1	BGIBMGA009235	0.41	663	1e-142	FBpp0304313	252920 mucopolysaccharidosis type iiib;
NP_689632.2	BGIBMGA001270	0.39	384	6e-73	FBpp0310139	252930 mucopolysaccharidosis type iiic;
NP_689632.2	BGIBMGA004220	0.4	389	3e-81	FBpp0310139	252930 mucopolysaccharidosis type iiic;
NP_002067.1	BGIBMGA007568	0.44	100	9e-14	FBpp0306755	252940 mucopolysaccharidosis type iiid;
BAD97204.1	BGIBMGA007569	0.44	208	5e-40	FBpp0306755	252940 mucopolysaccharidosis type iiid;
NP_002067.1	BGIBMGA007570	0.42	80	2e-09	FBpp0306755	252940 mucopolysaccharidosis type iiid;
BAF84460.1	BGIBMGA012952	0.46	479	6e-112	FBpp0086833	252940 mucopolysaccharidosis type iiid;
AAA51779.1	BGIBMGA001098	0.43	288	4e-67	FBpp0290455	253200 mucopolysaccharidosis type vi;
AAA51779.1	BGIBMGA012509	0.34	388	7e-55	FBpp0290455	253200 mucopolysaccharidosis type vi;
BAG37417.1	BGIBMGA012510	0.3	314	1e-28	FBpp0290455	253200 mucopolysaccharidosis type vi;
AAA51779.1	BGIBMGA012511	0.38	336	1e-58	FBpp0290455	253200 mucopolysaccharidosis type vi;
AAA51779.1	BGIBMGA012512	0.36	172	3e-23	FBpp0290455	253200 mucopolysaccharidosis type vi;
NP_000172.2	BGIBMGA005500	0.43	498	1e-120	FBpp0309401	253220 mucopolysaccharidosis type vii;
NP_056109.1	BGIBMGA002780	0.66	445	8e-173		253250 mulibrey nanism;
NP_000051.1	BGIBMGA012994	0.32	284	7e-33	FBpp0070845	253260 biotinidase deficiency;
NP_060209.3	BGIBMGA009702	0.34	208	3e-25	FBpp0085571	253280 muscular dystrophy-dystroglycanopathy (congenital with brain and eye anomalies), type a, 3; mddga3; 613151 muscular dystrophy-dystroglycanopathy (congenital with mental retardation), type b, 3; mddgb3; 613157 muscular dystrophy-dystroglycanopathy (limb-girdle), type c, 3; mddgc3;
NP_000070.1	BGIBMGA007809	0.28	343	1e-31	FBpp0077724	253290 multiple pterygium syndrome, lethal type; lmps; 608930 myasthenic syndrome, congenital, fast-channel; 601462 myasthenic syndrome, congenital, slow-channel; sccms;
NP_000061.1	BGIBMGA000097	0.42	761	1e-173	FBpp0309435	253600 muscular dystrophy, limb-girdle, type 2a; lgmd2a;
NP_997630.1	BGIBMGA001044	0.31	162	4e-17	FBpp0291024	253600 muscular dystrophy, limb-girdle, type 2a; lgmd2a;
NP_775110.1	BGIBMGA002120	0.23	582	4e-40	FBpp0074005	253600 muscular dystrophy, limb-girdle, type 2a; lgmd2a;
NP_997630.1	BGIBMGA007376	0.28	158	3e-06	FBpp0111782	253600 muscular dystrophy, limb-girdle, type 2a; lgmd2a;
NP_775110.1	BGIBMGA014111	0.3	292	8e-21	FBpp0312188	253600 muscular dystrophy, limb-girdle, type 2a; lgmd2a;
NP_066266.3	BGIBMGA013468	0.37	526	5e-88	FBpp0088397	254210 myasthenic syndrome, congenital, associated with episodic apnea;
NP_940978.2	BGIBMGA003498	0.34	731	6e-108	FBpp0076385	254300 myasthenia, limb-girdle, familial;
NP_940978.2	BGIBMGA003503	0.34	727	2e-106	FBpp0309662	254300 myasthenia, limb-girdle, familial;
NP_940978.2	BGIBMGA003504	0.28	170	4e-14	FBpp0310538	254300 myasthenia, limb-girdle, familial;
NP_940978.2	BGIBMGA009047	0.34	172	3e-11	FBpp0305613	254300 myasthenia, limb-girdle, familial;
NP_940978.2	BGIBMGA013655	0.25	506	1e-31	FBpp0076385	254300 myasthenia, limb-girdle, familial;
NP_940988.2	BGIBMGA002757	0.26	221	8e-09	FBpp0289361	254780 myoclonic epilepsy of lafora;
NP_005497.1	BGIBMGA013572	0.29	399	1e-34	FBpp0082805	254900 epilepsy, progressive myoclonic 4, with or without renal failure; epm4;
NP_647599.1	BGIBMGA008001	0.34	448	5e-68	FBpp0305312	255200 myopathy, centronuclear, 2; cnm2;
NP_510870.1	BGIBMGA001309	0.54	312	6e-79	FBpp0072117	256000 leigh syndrome; ls;
NP_689629.2	BGIBMGA003182	0.4	205	1e-35	FBpp0311993	256000 leigh syndrome; ls;
NP_002479.1	BGIBMGA003301	0.55	80	9e-22	FBpp0077130	256000 leigh syndrome; ls;
NP_004542.1	BGIBMGA003447	0.6	194	7e-66	FBpp0072975	256000 leigh syndrome; ls;
NP_002487.1	BGIBMGA003924	0.83	175	9e-88	FBpp0082645	256000 leigh syndrome; ls;
NP_077718.3	BGIBMGA005137	0.74	169	2e-74	FBpp0309363	256000 leigh syndrome; ls;
NP_077718.3	BGIBMGA005439	0.75	187	7e-69	FBpp0309363	256000 leigh syndrome; ls;
NP_004542.1	BGIBMGA014483	0.73	208	1e-88	FBpp0072975	256000 leigh syndrome; ls;
NP_003163.1	BGIBMGA000722	0.47	244	2e-57	FBpp0076607	256000 leigh syndrome; ls;
NP_000099.2	BGIBMGA000292	0.66	483	0	FBpp0304195	256000 leigh syndrome; ls; 248600 maple syrup urine disease; msud;
NP_060017.1	BGIBMGA005943	0.38	424	1e-66	FBpp0080719	256000 leigh syndrome; ls; 252010 mitochondrial complex i deficiency;
NP_002486.1	BGIBMGA004009	0.57	133	5e-40	FBpp0074481	256000 leigh syndrome; ls; 252010 mitochondrial complex i deficiency;
NP_004534.2	BGIBMGA009282	0.47	54	3e-07	FBpp0083373	256030 nemaline myopathy 2; nem2;
NP_004534.2	BGIBMGA009778	0.69	55	6e-16	FBpp0075109	256030 nemaline myopathy 2; nem2;
NP_003551.2	BGIBMGA011625	0.35	783	2e-119	FBpp0076091	256600 neurodegeneration with brain iron accumulation 2a; nbia2a; 610217 neurodegeneration with brain iron accumulation 2b; nbia2b; 612953 parkinson disease 14, autosomal recessive; park14;
NP_003551.2	BGIBMGA013910	0.27	338	3e-14		256600 neurodegeneration with brain iron accumulation 2a; nbia2a; 610217 neurodegeneration with brain iron accumulation 2b; nbia2b; 612953 parkinson disease 14, autosomal recessive; park14;
NP_937818.1	BGIBMGA007701	0.77	148	1e-63	FBpp0312191	256700 neuroblastoma, susceptibility to;
NP_000301.1	BGIBMGA006016	0.27	237	2e-18	FBpp0079801	256730 ceroid lipofuscinosis, neuronal, 1; cln1;
NP_000301.1	BGIBMGA011835	0.55	256	7e-81	FBpp0311872	256730 ceroid lipofuscinosis, neuronal, 1; cln1;
NP_002428.1	BGIBMGA007722	0.42	172	3e-34	FBpp0088286	256810 mitochondrial dna depletion syndrome 6 (hepatocerebral type); mtdps6;
NP_002428.1	BGIBMGA011645	0.3	116	3e-09	FBpp0306211	256810 mitochondrial dna depletion syndrome 6 (hepatocerebral type); mtdps6;
NP_002428.1	BGIBMGA011828	0.25	170	3e-08	FBpp0309558	256810 mitochondrial dna depletion syndrome 6 (hepatocerebral type); mtdps6;
NP_002428.1	BGIBMGA011829	0.31	150	2e-11	FBpp0309558	256810 mitochondrial dna depletion syndrome 6 (hepatocerebral type); mtdps6;
NP_071324.1	BGIBMGA006586	0.28	178	1e-17	FBpp0309116	256850 giant axonal neuropathy 1; gan1;
NP_071324.1	BGIBMGA006864	0.33	201	2e-22	FBpp0080063	256850 giant axonal neuropathy 1; gan1;
NP_001007594.2	BGIBMGA003720	0.47	407	1e-110	FBpp0300565	257200 niemann-pick disease, type a; 607616 niemann-pick disease, type b;
BAF85077.1	BGIBMGA008045	0.3	354	2e-34	FBpp0305041	257200 niemann-pick disease, type a; 607616 niemann-pick disease, type b;
ADW08999.1	BGIBMGA012548	0.32	508	1e-63	FBpp0084990	257200 niemann-pick disease, type a; 607616 niemann-pick disease, type b;
NP_000262.2	BGIBMGA000468	0.28	133	3e-06	FBpp0078314	257220 niemann-pick disease, type c1; npc1;
AAB63982.1	BGIBMGA008348	0.34	1182	2e-176	FBpp0310205	257220 niemann-pick disease, type c1; npc1;
NP_000262.2	BGIBMGA009049	0.43	1196	0	FBpp0292910	257220 niemann-pick disease, type c1; npc1;
AAH63302.1	BGIBMGA012297	0.25	174	3e-09	FBpp0085363	257220 niemann-pick disease, type c1; npc1;
NP_079492.2	BGIBMGA006147	0.49	73	6e-15	FBpp0292305	257980 odontoonychodermal dysplasia; oodd; 224750 schopf-schulz-passarge syndrome; ssps; 150400 tooth agenesis, selective, 4; sthag4;
NP_005699.1	BGIBMGA003304	0.46	216	4e-51	FBpp0305246	258315 omodysplasia 1; omod1;
NP_079412.1	BGIBMGA004929	0.54	103	2e-25	FBpp0303395	258501 3-methylglutaconic aciduria, type iii; mgca3; 165300 optic atrophy 3, autosomal dominant;
NP_000265.1	BGIBMGA003564	0.66	401	2e-157	FBpp0074729	258870 gyrate atrophy of choroid and retina; gacr;
NP_000265.1	BGIBMGA011600	0.28	383	5e-36	FBpp0078188	258870 gyrate atrophy of choroid and retina; gacr;
NP_000265.1	BGIBMGA011601	0.31	331	2e-35	FBpp0112101	258870 gyrate atrophy of choroid and retina; gacr;
NP_000265.1	BGIBMGA012526	0.27	367	1e-30	FBpp0075543	258870 gyrate atrophy of choroid and retina; gacr;
NP_000851.2	BGIBMGA002939	0.32	201	1e-26	FBpp0075142	259100 hypertrophic osteoarthropathy, primary, autosomal recessive, 1; phoar1; 119900 digital clubbing, isolated congenital;
NP_000851.2	BGIBMGA002940	0.32	245	2e-30	FBpp0113028	259100 hypertrophic osteoarthropathy, primary, autosomal recessive, 1; phoar1; 119900 digital clubbing, isolated congenital;
NP_000851.2	BGIBMGA002941	0.33	245	2e-30	FBpp0113028	259100 hypertrophic osteoarthropathy, primary, autosomal recessive, 1; phoar1; 119900 digital clubbing, isolated congenital;
AAA89175.1	BGIBMGA002942	0.33	197	2e-26	FBpp0300159	259100 hypertrophic osteoarthropathy, primary, autosomal recessive, 1; phoar1; 119900 digital clubbing, isolated congenital;
NP_001139288.1	BGIBMGA002943	0.38	99	6e-11	FBpp0309547	259100 hypertrophic osteoarthropathy, primary, autosomal recessive, 1; phoar1; 119900 digital clubbing, isolated congenital;
NP_000851.2	BGIBMGA002944	0.28	224	1e-18	FBpp0113028	259100 hypertrophic osteoarthropathy, primary, autosomal recessive, 1; phoar1; 119900 digital clubbing, isolated congenital;
NP_000851.2	BGIBMGA002945	0.33	160	4e-13	FBpp0113029	259100 hypertrophic osteoarthropathy, primary, autosomal recessive, 1; phoar1; 119900 digital clubbing, isolated congenital;
NP_000851.2	BGIBMGA003940	0.31	179	1e-18	FBpp0113029	259100 hypertrophic osteoarthropathy, primary, autosomal recessive, 1; phoar1; 119900 digital clubbing, isolated congenital;
NP_000851.2	BGIBMGA003941	0.36	199	4e-29	FBpp0113028	259100 hypertrophic osteoarthropathy, primary, autosomal recessive, 1; phoar1; 119900 digital clubbing, isolated congenital;
NP_000851.2	BGIBMGA003942	0.31	189	2e-18	FBpp0113029	259100 hypertrophic osteoarthropathy, primary, autosomal recessive, 1; phoar1; 119900 digital clubbing, isolated congenital;
NP_000851.2	BGIBMGA003956	0.34	209	4e-30	FBpp0113029	259100 hypertrophic osteoarthropathy, primary, autosomal recessive, 1; phoar1; 119900 digital clubbing, isolated congenital;
NP_000851.2	BGIBMGA005248	0.28	192	6e-17	FBpp0291423	259100 hypertrophic osteoarthropathy, primary, autosomal recessive, 1; phoar1; 119900 digital clubbing, isolated congenital;
AAA89175.1	BGIBMGA005808	0.3	188	8e-15	FBpp0071071	259100 hypertrophic osteoarthropathy, primary, autosomal recessive, 1; phoar1; 119900 digital clubbing, isolated congenital;
NP_000851.2	BGIBMGA005826	0.36	193	4e-23	FBpp0113029	259100 hypertrophic osteoarthropathy, primary, autosomal recessive, 1; phoar1; 119900 digital clubbing, isolated congenital;
NP_000851.2	BGIBMGA005827	0.37	194	4e-27	FBpp0113029	259100 hypertrophic osteoarthropathy, primary, autosomal recessive, 1; phoar1; 119900 digital clubbing, isolated congenital;
NP_000851.2	BGIBMGA005828	0.28	216	1e-15	FBpp0075142	259100 hypertrophic osteoarthropathy, primary, autosomal recessive, 1; phoar1; 119900 digital clubbing, isolated congenital;
NP_000851.2	BGIBMGA005831	0.36	188	2e-23	FBpp0113028	259100 hypertrophic osteoarthropathy, primary, autosomal recessive, 1; phoar1; 119900 digital clubbing, isolated congenital;
NP_000851.2	BGIBMGA005832	0.36	188	2e-23	FBpp0113028	259100 hypertrophic osteoarthropathy, primary, autosomal recessive, 1; phoar1; 119900 digital clubbing, isolated congenital;
NP_000851.2	BGIBMGA008902	0.27	131	8e-08	FBpp0303796	259100 hypertrophic osteoarthropathy, primary, autosomal recessive, 1; phoar1; 119900 digital clubbing, isolated congenital;
NP_000851.2	BGIBMGA010512	0.34	186	2e-15	FBpp0070179	259100 hypertrophic osteoarthropathy, primary, autosomal recessive, 1; phoar1; 119900 digital clubbing, isolated congenital;
NP_000851.2	BGIBMGA011860	0.39	203	1e-39	FBpp0075142	259100 hypertrophic osteoarthropathy, primary, autosomal recessive, 1; phoar1; 119900 digital clubbing, isolated congenital;
NP_000851.2	BGIBMGA013161	0.33	145	3e-14	FBpp0070179	259100 hypertrophic osteoarthropathy, primary, autosomal recessive, 1; phoar1; 119900 digital clubbing, isolated congenital;
NP_000851.2	BGIBMGA014024	0.33	188	7e-23	FBpp0113028	259100 hypertrophic osteoarthropathy, primary, autosomal recessive, 1; phoar1; 119900 digital clubbing, isolated congenital;
NP_000851.2	BGIBMGA014025	0.33	188	3e-24	FBpp0113028	259100 hypertrophic osteoarthropathy, primary, autosomal recessive, 1; phoar1; 119900 digital clubbing, isolated congenital;
NP_000851.2	BGIBMGA014030	0.33	212	2e-17	FBpp0113028	259100 hypertrophic osteoarthropathy, primary, autosomal recessive, 1; phoar1; 119900 digital clubbing, isolated congenital;
NP_000851.2	BGIBMGA014031	0.32	212	1e-23	FBpp0300159	259100 hypertrophic osteoarthropathy, primary, autosomal recessive, 1; phoar1; 119900 digital clubbing, isolated congenital;
NP_000851.2	BGIBMGA014291	0.41	74	6e-09	FBpp0113029	259100 hypertrophic osteoarthropathy, primary, autosomal recessive, 1; phoar1; 119900 digital clubbing, isolated congenital;
NP_000851.2	BGIBMGA014342	0.39	75	2e-08	FBpp0113029	259100 hypertrophic osteoarthropathy, primary, autosomal recessive, 1; phoar1; 119900 digital clubbing, isolated congenital;
NP_000851.2	BGIBMGA014620	0.32	188	2e-22	FBpp0113028	259100 hypertrophic osteoarthropathy, primary, autosomal recessive, 1; phoar1; 119900 digital clubbing, isolated congenital;
NP_000933.1	BGIBMGA002151	0.5	143	6e-28	FBpp0072463	259440 osteogenesis imperfecta, type ix; oi9;
NP_000933.1	BGIBMGA002786	0.45	144	2e-22	FBpp0086323	259440 osteogenesis imperfecta, type ix; oi9;
NP_000933.1	BGIBMGA003932	0.3	159	1e-12	FBpp0084258	259440 osteogenesis imperfecta, type ix; oi9;
NP_000933.1	BGIBMGA004059	0.69	192	8e-67	FBpp0311613	259440 osteogenesis imperfecta, type ix; oi9;
NP_000933.1	BGIBMGA004163	0.51	143	8e-26	FBpp0310092	259440 osteogenesis imperfecta, type ix; oi9;
NP_000933.1	BGIBMGA006771	0.56	160	6e-47	FBpp0298837	259440 osteogenesis imperfecta, type ix; oi9;
NP_000933.1	BGIBMGA008977	0.35	155	3e-12	FBpp0084113	259440 osteogenesis imperfecta, type ix; oi9;
NP_000933.1	BGIBMGA009341	0.44	113	7e-14	FBpp0305988	259440 osteogenesis imperfecta, type ix; oi9;
NP_000933.1	BGIBMGA009740	0.43	115	4e-13	FBpp0075761	259440 osteogenesis imperfecta, type ix; oi9;
CAG33110.1	BGIBMGA013557	0.51	94	4e-22	FBpp0077688	259440 osteogenesis imperfecta, type ix; oi9;
NP_064608.2	BGIBMGA003536	0.32	343	1e-44	FBpp0310751	259775 raine syndrome; rns;
NP_064608.2	BGIBMGA007012	0.59	348	6e-119	FBpp0307565	259775 raine syndrome; rns;
NP_000021.1	BGIBMGA005458	0.38	314	1e-53	FBpp0070875	259900 hyperoxaluria, primary, type i; hp1;
AAA62202.1	BGIBMGA011019	0.46	261	3e-53	FBpp0087757	260600 leukodystrophy, hypomyelinating, 3; hld3;
BAD92959.1	BGIBMGA013075	0.34	271	8e-27	FBpp0305315	260920 hyper-igd syndrome; hids; 610377 mevalonic aciduria; meva;
NP_000405.1	BGIBMGA001929	0.48	732	3e-178	FBpp0309384	261515 d-bifunctional protein deficiency; 233400 perrault syndrome 1; prlts1;
BAG52804.1	BGIBMGA007118	0.37	100	8e-13	FBpp0084585	261515 d-bifunctional protein deficiency; 233400 perrault syndrome 1; prlts1;
BAG35356.1	BGIBMGA008987	0.31	201	8e-12	FBpp0077075	261515 d-bifunctional protein deficiency; 233400 perrault syndrome 1; prlts1;
NP_919299.3	BGIBMGA006682	0.39	148	7e-21	FBpp0309830	261540 peters-plus syndrome;
NP_919299.3	BGIBMGA006683	0.43	175	2e-27	FBpp0078855	261540 peters-plus syndrome;
NP_000268.1	BGIBMGA003866	0.6	429	1e-149	FBpp0306707	261600 phenylketonuria; pku;
NP_000311.2	BGIBMGA003987	0.57	228	1e-63	FBpp0099972	261630 hyperphenylalaninemia, bh4-deficient, c; hpabh4c;
NP_000308.1	BGIBMGA003643	0.64	131	2e-47	FBpp0088417	261640 hyperphenylalaninemia, bh4-deficient, a; hpabh4a;
NP_001027005.1	BGIBMGA003008	0.46	997	0	FBpp0079254	261750 glycogen storage disease ixb; gsd9b;
NP_000366.1	BGIBMGA000197	0.3	257	4e-28	FBpp0305783	263700 porphyria, congenital erythropoietic;
CAA50574.1	BGIBMGA002573	0.42	660	2e-141	FBpp0088517	264470 peroxisomal acyl-coa oxidase deficiency;
AAB30019.2	BGIBMGA002574	0.45	657	2e-160	FBpp0088517	264470 peroxisomal acyl-coa oxidase deficiency;
AAB30019.2	BGIBMGA002575	0.45	655	3e-164	FBpp0088517	264470 peroxisomal acyl-coa oxidase deficiency;
AAB30019.2	BGIBMGA002576	0.44	660	2e-149	FBpp0088517	264470 peroxisomal acyl-coa oxidase deficiency;
AAA19113.1	BGIBMGA002577	0.48	277	1e-73	FBpp0088517	264470 peroxisomal acyl-coa oxidase deficiency;
AAB30019.2	BGIBMGA002578	0.38	340	1e-57	FBpp0088517	264470 peroxisomal acyl-coa oxidase deficiency;
AAB30019.2	BGIBMGA002716	0.44	661	3e-150	FBpp0088517	264470 peroxisomal acyl-coa oxidase deficiency;
AAA19113.1	BGIBMGA006656	0.31	430	8e-54	FBpp0311763	264470 peroxisomal acyl-coa oxidase deficiency;
CAA50574.1	BGIBMGA006689	0.26	632	2e-45	FBpp0290046	264470 peroxisomal acyl-coa oxidase deficiency;
NP_000776.1	BGIBMGA001277	0.31	332	2e-31	FBpp0083144	264700 vitamin d hydroxylation-deficient rickets, type 1a; vddr1a;
NP_000776.1	BGIBMGA005356	0.28	384	1e-28	FBpp0083144	264700 vitamin d hydroxylation-deficient rickets, type 1a; vddr1a;
NP_000776.1	BGIBMGA009522	0.28	364	2e-32	FBpp0086937	264700 vitamin d hydroxylation-deficient rickets, type 1a; vddr1a;
NP_000776.1	BGIBMGA009523	0.32	378	1e-44	FBpp0293134	264700 vitamin d hydroxylation-deficient rickets, type 1a; vddr1a;
NP_071449.1	BGIBMGA011693	0.4	581	2e-119	FBpp0072782	264800 pseudoxanthoma elasticum; pxe;
NP_000387.1	BGIBMGA004622	0.36	210	3e-33	FBpp0079644	265800 pycnodysostosis;
NP_000387.1	BGIBMGA005131	0.37	294	5e-46	FBpp0078465	265800 pycnodysostosis;
NP_000387.1	BGIBMGA006893	0.43	75	3e-11	FBpp0075508	265800 pycnodysostosis;
NP_000387.1	BGIBMGA009139	0.39	301	4e-55	FBpp0075508	265800 pycnodysostosis;
NP_000387.1	BGIBMGA009146	0.31	194	4e-22	FBpp0075508	265800 pycnodysostosis;
NP_000387.1	BGIBMGA009184	0.33	293	4e-40	FBpp0075508	265800 pycnodysostosis;
NP_000387.1	BGIBMGA009230	0.39	201	7e-29	FBpp0292990	265800 pycnodysostosis;
NP_000387.1	BGIBMGA011342	0.46	308	1e-82	FBpp0086719	265800 pycnodysostosis;
NP_060859.4	BGIBMGA000854	0.53	242	3e-69	FBpp0081352	266265 congenital disorder of glycosylation, type iic; cdg2c;
NP_006205.1	BGIBMGA004766	0.3	245	5e-18	FBpp0112127	266500 refsum disease, classic;
CAG46852.1	BGIBMGA013933	0.44	224	2e-47	FBpp0112127	266500 refsum disease, classic;
NP_006205.1	BGIBMGA013934	0.47	162	2e-36	FBpp0112127	266500 refsum disease, classic;
NP_000279.1	BGIBMGA001282	0.3	81	8e-06	FBpp0076028	266500 refsum disease, classic; 215100 rhizomelic chondrodysplasia punctata, type 1; rcdp1;
NP_000279.1	BGIBMGA003015	0.23	174	1e-08	FBpp0310217	266500 refsum disease, classic; 215100 rhizomelic chondrodysplasia punctata, type 1; rcdp1;
NP_000279.1	BGIBMGA008884	0.26	232	4e-18	FBpp0078363	266500 refsum disease, classic; 215100 rhizomelic chondrodysplasia punctata, type 1; rcdp1;
NP_000279.1	BGIBMGA010858	0.47	187	2e-41	FBpp0271836	266500 refsum disease, classic; 215100 rhizomelic chondrodysplasia punctata, type 1; rcdp1;
NP_000279.1	BGIBMGA010859	0.45	93	1e-17	FBpp0271836	266500 refsum disease, classic; 215100 rhizomelic chondrodysplasia punctata, type 1; rcdp1;
NP_000279.1	BGIBMGA012127	0.3	168	6e-14	FBpp0307248	266500 refsum disease, classic; 215100 rhizomelic chondrodysplasia punctata, type 1; rcdp1;
NP_000279.1	BGIBMGA014058	0.19	202	7e-06	FBpp0075704	266500 refsum disease, classic; 215100 rhizomelic chondrodysplasia punctata, type 1; rcdp1;
NP_001683.2	BGIBMGA001853	0.27	361	8e-23	FBpp0071794	267300 renal tubular acidosis, distal, with progressive nerve deafness;
NP_001683.2	BGIBMGA002241	0.86	481	0	FBpp0290875	267300 renal tubular acidosis, distal, with progressive nerve deafness;
NP_001683.2	BGIBMGA003901	0.24	375	5e-14	FBpp0305828	267300 renal tubular acidosis, distal, with progressive nerve deafness;
AAA36498.1	BGIBMGA008295	0.23	425	3e-19	FBpp0307597	267300 renal tubular acidosis, distal, with progressive nerve deafness;
NP_001683.2	BGIBMGA012549	0.26	389	1e-20	FBpp0305828	267300 renal tubular acidosis, distal, with progressive nerve deafness;
NP_001683.2	BGIBMGA012555	0.26	389	1e-20	FBpp0305828	267300 renal tubular acidosis, distal, with progressive nerve deafness;
AAR83298.1	BGIBMGA012062	0.44	153	8e-33	FBpp0308937	267750 knobloch syndrome 1; kno1;
NP_569712.2	BGIBMGA012065	0.32	181	7e-17	FBpp0308937	267750 knobloch syndrome 1; kno1;
NP_569712.2	BGIBMGA012091	0.37	158	2e-23	FBpp0297593	267750 knobloch syndrome 1; kno1;
NP_057430.1	BGIBMGA001391	0.46	122	3e-23	FBpp0082035	268100 enhanced s-cone syndrome; escs; 611131 retinitis pigmentosa 37; rp37;
NP_055064.1	BGIBMGA001392	0.53	58	5e-12	FBpp0303610	268100 enhanced s-cone syndrome; escs; 611131 retinitis pigmentosa 37; rp37;
NP_055064.1	BGIBMGA002000	0.37	363	3e-56	FBpp0085071	268100 enhanced s-cone syndrome; escs; 611131 retinitis pigmentosa 37; rp37;
NP_055064.1	BGIBMGA010370	0.47	180	2e-25	FBpp0305445	268100 enhanced s-cone syndrome; escs; 611131 retinitis pigmentosa 37; rp37;
NP_055064.1	BGIBMGA013855	0.57	215	3e-48	FBpp0112948	268100 enhanced s-cone syndrome; escs; 611131 retinitis pigmentosa 37; rp37;
NP_001017420.1	BGIBMGA004268	0.38	239	9e-40	FBpp0099670	268300 roberts syndrome; rbs; 269000 sc phocomelia syndrome;
NP_055954.1	BGIBMGA002053	0.55	313	9e-97	FBpp0289098	269250 schneckenbecken dysplasia;
NP_116056.3	BGIBMGA000088	0.45	65	3e-12	FBpp0070426	269700 lipodystrophy, congenital generalized, type 2; cgl2; 600794 neuronopathy, distal hereditary motor, type va; hmn5a; 270685 spastic paraplegia 17, autosomal dominant; spg17;
NP_001026976.1	BGIBMGA001965	0.47	386	7e-104	FBpp0302794	270200 sjogren-larsson syndrome; sls;
NP_001026976.1	BGIBMGA001966	0.42	454	8e-106	FBpp0302795	270200 sjogren-larsson syndrome; sls;
NP_000866.1	BGIBMGA008240	0.41	123	3e-19	FBpp0292852	270450 insulin-like growth factor i, resistance to;
EAX02222.1	BGIBMGA008597	0.23	573	3e-22	FBpp0311935	270450 insulin-like growth factor i, resistance to;
NP_056161.2	BGIBMGA004029	0.43	92	1e-18	FBpp0308661	270700 spastic paraplegia 15, autosomal recessive; spg15;
NP_056161.2	BGIBMGA005041	0.25	363	2e-35	FBpp0081863	270700 spastic paraplegia 15, autosomal recessive; spg15;
NP_068602.2	BGIBMGA007555	0.54	296	8e-93	FBpp0079501	271245 mitochondrial dna depletion syndrome 7 (hepatocerebral type); mtdps7; 609286 progressive external ophthalmoplegia with mitochondrial dna deletions, autosomal dominant, 3; peoa3;
NP_006173.2	BGIBMGA000491	0.35	241	4e-37	FBpp0311100	271665 spondylometaepiphyseal dysplasia, short limb-hand type;
NP_006173.2	BGIBMGA000492	0.29	136	1e-11	FBpp0292228	271665 spondylometaepiphyseal dysplasia, short limb-hand type;
NP_006173.2	BGIBMGA000587	0.44	295	5e-68	FBpp0311100	271665 spondylometaepiphyseal dysplasia, short limb-hand type;
NP_006173.2	BGIBMGA010927	0.34	127	5e-15	FBpp0293864	271665 spondylometaepiphyseal dysplasia, short limb-hand type;
NP_714941.1	BGIBMGA013791	0.38	375	1e-57	FBpp0309066	271930 striatonigral degeneration, infantile; sndi;
NP_001071.1	BGIBMGA011482	0.52	471	8e-136	FBpp0306572	271980 succinic semialdehyde dehydrogenase deficiency; ssadhd;
NP_877437.2	BGIBMGA000290	0.51	245	1e-69	FBpp0072436	272200 multiple sulfatase deficiency; msd;
NP_001027559.1	BGIBMGA005750	0.45	362	1e-83	FBpp0074426	272300 sulfocysteinuria;
ABW03529.1	BGIBMGA011646	0.3	464	2e-53	FBpp0071192	272800 tay-sachs disease; tsd;
NP_110380.1	BGIBMGA006004	0.41	227	1e-53	FBpp0306846	273395 tetraamelia, autosomal recessive;
NP_000410.2	BGIBMGA006655	0.32	601	2e-69	FBpp0290568	273800 glanzmann thrombasthenia; gt;
NP_000410.2	BGIBMGA006716	0.25	405	6e-15	FBpp0086503	273800 glanzmann thrombasthenia; gt;
AAA35926.1	BGIBMGA006717	0.3	287	9e-17	FBpp0086503	273800 glanzmann thrombasthenia; gt;
BAF83906.1	BGIBMGA007111	0.63	1024	0	FBpp0071273	274270 dihydropyrimidine dehydrogenase deficiency;
NP_000101.2	BGIBMGA012701	0.28	232	3e-10	FBpp0075103	274270 dihydropyrimidine dehydrogenase deficiency;
NP_000444.1	BGIBMGA000687	0.34	181	2e-20	FBpp0081881	274400 thyroid dyshormonogenesis 1; tdh1;
NP_000444.1	BGIBMGA002324	0.29	454	3e-38	FBpp0308311	274400 thyroid dyshormonogenesis 1; tdh1;
NP_000444.1	BGIBMGA002621	0.3	257	1e-25	FBpp0081881	274400 thyroid dyshormonogenesis 1; tdh1;
NP_000444.1	BGIBMGA002623	0.31	423	5e-47	FBpp0081881	274400 thyroid dyshormonogenesis 1; tdh1;
NP_000444.1	BGIBMGA005988	0.32	538	1e-49	FBpp0079253	274400 thyroid dyshormonogenesis 1; tdh1;
NP_000444.1	BGIBMGA006860	0.32	337	5e-44	FBpp0312161	274400 thyroid dyshormonogenesis 1; tdh1;
NP_000444.1	BGIBMGA012132	0.26	237	9e-15	FBpp0081881	274400 thyroid dyshormonogenesis 1; tdh1;
NP_000444.1	BGIBMGA012502	0.36	176	5e-22	FBpp0073268	274400 thyroid dyshormonogenesis 1; tdh1;
AAL74416.1	BGIBMGA000239	0.21	416	2e-15	FBpp0307990	274500 thyroid dyshormonogenesis 2a; tdh2a;
AAA61215.1	BGIBMGA000553	0.4	716	9e-148	FBpp0089216	274500 thyroid dyshormonogenesis 2a; tdh2a;
AAA61217.2	BGIBMGA005680	0.36	557	1e-85	FBpp0293051	274500 thyroid dyshormonogenesis 2a; tdh2a;
AAA61215.1	BGIBMGA012738	0.25	161	7e-10	FBpp0307990	274500 thyroid dyshormonogenesis 2a; tdh2a;
AAA61217.2	BGIBMGA012740	0.23	565	1e-23	FBpp0307990	274500 thyroid dyshormonogenesis 2a; tdh2a;
AAA61215.1	BGIBMGA013482	0.36	489	3e-68	FBpp0083696	274500 thyroid dyshormonogenesis 2a; tdh2a;
NP_001193673.1	BGIBMGA013483	0.36	107	1e-10	FBpp0083696	274500 thyroid dyshormonogenesis 2a; tdh2a;
AAA61217.2	BGIBMGA013640	0.32	557	6e-65	FBpp0082932	274500 thyroid dyshormonogenesis 2a; tdh2a;
AAA61217.2	BGIBMGA014559	0.34	526	1e-72	FBpp0082883	274500 thyroid dyshormonogenesis 2a; tdh2a;
ADQ32120.1	BGIBMGA013646	0.6	191	8e-60	FBpp0290579	274800 thyroid dyshormonogenesis 4; tdh4;
ABF48256.1	BGIBMGA005479	0.29	241	1e-14	FBpp0304790	274900 thyroid dyshormonogenesis 5; tdh5;
NP_057090.2	BGIBMGA002756	0.46	270	3e-70	FBpp0311746	275630 chanarin-dorfman syndrome; cds;
NP_997229.2	BGIBMGA006997	0.33	159	1e-14	FBpp0075748	277470 pontocerebellar hypoplasia, type 2a; pch2a; 225753 pontocerebellar hypoplasia, type 4; pch4;
NP_112219.2	BGIBMGA001434	0.33	111	7e-09	FBpp0290306	277600 weill-marchesani syndrome 1; wms1;
NP_112219.2	BGIBMGA001435	0.33	472	1e-70	FBpp0290305	277600 weill-marchesani syndrome 1; wms1;
NP_112219.2	BGIBMGA001969	0.33	290	2e-37	FBpp0301591	277600 weill-marchesani syndrome 1; wms1;
NP_112219.2	BGIBMGA013967	0.34	131	2e-19	FBpp0298832	277600 weill-marchesani syndrome 1; wms1;
BAD18561.1	BGIBMGA013969	0.32	153	1e-25	FBpp0290222	277600 weill-marchesani syndrome 1; wms1;
NP_000544.2	BGIBMGA003312	0.41	148	2e-19	FBpp0300531	277700 werner syndrome; wrn;
NP_000544.2	BGIBMGA004822	0.24	165	2e-07	FBpp0081324	277700 werner syndrome; wrn;
BAG58555.1	BGIBMGA000946	0.4	555	1e-102	FBpp0086506	278720 xeroderma pigmentosum, complementation group c; xpc;
BAG59690.1	BGIBMGA005454	0.31	126	5e-09	FBpp0086007	300000 opitz gbbb syndrome, x-linked;
NP_150632.1	BGIBMGA010615	0.23	467	1e-27	FBpp0079685	300000 opitz gbbb syndrome, x-linked;
BAG59690.1	BGIBMGA014126	0.24	243	7e-12	FBpp0085757	300000 opitz gbbb syndrome, x-linked;
NP_835366.1	BGIBMGA002784	0.44	87	4e-11	FBpp0288783	300067 lissencephaly, x-linked, 1; lisx1;
NP_000024.2	BGIBMGA004616	0.48	640	4e-160	FBpp0300567	300100 adrenoleukodystrophy; ald;
NP_060215.4	BGIBMGA002412	0.39	227	6e-34	FBpp0305024	300166 microphthalmia, syndromic 2; mcops2;
NP_001036002.1	BGIBMGA002636	0.46	299	8e-51	FBpp0305540	300243 mental retardation, x-linked, syndromic, christianson type; mrxsch;
NP_006350.1	BGIBMGA002637	0.65	105	3e-26	FBpp0305540	300243 mental retardation, x-linked, syndromic, christianson type; mrxsch;
BAG62192.1	BGIBMGA004271	0.22	311	8e-10	FBpp0305540	300243 mental retardation, x-linked, syndromic, christianson type; mrxsch;
NP_006350.1	BGIBMGA011831	0.34	412	1e-56	FBpp0306289	300243 mental retardation, x-linked, syndromic, christianson type; mrxsch;
NP_741995.1	BGIBMGA001903	0.4	165	6e-33	FBpp0304216	300271 mental retardation, x-linked 72; mrx72;
NP_741995.1	BGIBMGA001928	0.47	188	1e-46	FBpp0307641	300271 mental retardation, x-linked 72; mrx72;
NP_741995.1	BGIBMGA002203	0.34	149	2e-22	FBpp0070814	300271 mental retardation, x-linked 72; mrx72;
AAL12244.1	BGIBMGA002209	0.44	207	2e-41	FBpp0083413	300271 mental retardation, x-linked 72; mrx72;
AAL12244.1	BGIBMGA002449	0.42	165	5e-35	FBpp0084111	300271 mental retardation, x-linked 72; mrx72;
NP_741995.1	BGIBMGA003266	0.38	136	1e-21	FBpp0072029	300271 mental retardation, x-linked 72; mrx72;
AAL12244.1	BGIBMGA003597	0.39	159	3e-30	FBpp0312096	300271 mental retardation, x-linked 72; mrx72;
NP_741995.1	BGIBMGA004846	0.46	187	8e-42	FBpp0300990	300271 mental retardation, x-linked 72; mrx72;
NP_741995.1	BGIBMGA006221	0.43	151	7e-34	FBpp0310268	300271 mental retardation, x-linked 72; mrx72;
AAL12244.1	BGIBMGA006641	0.42	192	7e-37	FBpp0086009	300271 mental retardation, x-linked 72; mrx72;
NP_741995.1	BGIBMGA006956	0.45	162	1e-35	FBpp0304179	300271 mental retardation, x-linked 72; mrx72;
AAL12244.1	BGIBMGA007814	0.24	144	3e-06	FBpp0077029	300271 mental retardation, x-linked 72; mrx72;
NP_741995.1	BGIBMGA009361	0.39	191	2e-36	FBpp0301227	300271 mental retardation, x-linked 72; mrx72;
NP_741995.1	BGIBMGA011280	0.53	193	1e-60	FBpp0298273	300271 mental retardation, x-linked 72; mrx72;
AAL12244.1	BGIBMGA014560	0.43	164	2e-30	FBpp0084111	300271 mental retardation, x-linked 72; mrx72;
NP_000368.1	BGIBMGA003431	0.4	107	7e-22	FBpp0307744	300299 neutropenia, severe congenital, x-linked; scnx; 313900 thrombocytopenia 1; thc1; 301000 wiskott-aldrich syndrome; was;
AAB32284.1	BGIBMGA004570	0.48	548	3e-170	FBpp0088910	300352 cerebral creatine deficiency syndrome 1; ccds1;
AAB32284.1	BGIBMGA008026	0.39	168	3e-24	FBpp0290385	300352 cerebral creatine deficiency syndrome 1; ccds1;
NP_003579.3	BGIBMGA002161	0.31	159	2e-18	FBpp0085255	300354 mental retardation, x-linked, with short stature, hypogonadism, and abnormal gait;
AAK16812.1	BGIBMGA005147	0.3	188	4e-12	FBpp0072065	300354 mental retardation, x-linked, with short stature, hypogonadism, and abnormal gait;
CAD97843.1	BGIBMGA005758	0.65	775	0	FBpp0290569	300354 mental retardation, x-linked, with short stature, hypogonadism, and abnormal gait;
CAD97843.1	BGIBMGA009674	0.32	621	2e-84	FBpp0087924	300354 mental retardation, x-linked, with short stature, hypogonadism, and abnormal gait;
CAD97843.1	BGIBMGA011511	0.29	572	1e-58	FBpp0084786	300354 mental retardation, x-linked, with short stature, hypogonadism, and abnormal gait;
CAD97843.1	BGIBMGA013548	0.4	564	9e-110	FBpp0291369	300354 mental retardation, x-linked, with short stature, hypogonadism, and abnormal gait;
NP_004014.1	BGIBMGA004139	0.29	207	2e-15	FBpp0306632	300376 muscular dystrophy, becker type; bmd; 302045 cardiomyopathy, dilated, 3b; cmd3b; 310200 muscular dystrophy, duchenne type; dmd;
NP_004014.1	BGIBMGA004415	0.21	514	4e-17	FBpp0293393	300376 muscular dystrophy, becker type; bmd; 302045 cardiomyopathy, dilated, 3b; cmd3b; 310200 muscular dystrophy, duchenne type; dmd;
NP_004001.1	BGIBMGA007314	0.21	161	5e-10	FBpp0293393	300376 muscular dystrophy, becker type; bmd; 302045 cardiomyopathy, dilated, 3b; cmd3b; 310200 muscular dystrophy, duchenne type; dmd;
NP_004000.1	BGIBMGA008636	0.58	76	1e-17	FBpp0306631	300376 muscular dystrophy, becker type; bmd; 302045 cardiomyopathy, dilated, 3b; cmd3b; 310200 muscular dystrophy, duchenne type; dmd;
NP_004003.1	BGIBMGA008637	0.44	95	4e-18	FBpp0306631	300376 muscular dystrophy, becker type; bmd; 302045 cardiomyopathy, dilated, 3b; cmd3b; 310200 muscular dystrophy, duchenne type; dmd;
NP_004014.1	BGIBMGA008642	0.28	176	3e-18	FBpp0306632	300376 muscular dystrophy, becker type; bmd; 302045 cardiomyopathy, dilated, 3b; cmd3b; 310200 muscular dystrophy, duchenne type; dmd;
NP_004014.1	BGIBMGA008647	0.31	147	2e-17	FBpp0306632	300376 muscular dystrophy, becker type; bmd; 302045 cardiomyopathy, dilated, 3b; cmd3b; 310200 muscular dystrophy, duchenne type; dmd;
NP_004013.1	BGIBMGA008648	0.39	268	2e-31	FBpp0306632	300376 muscular dystrophy, becker type; bmd; 302045 cardiomyopathy, dilated, 3b; cmd3b; 310200 muscular dystrophy, duchenne type; dmd;
NP_004831.1	BGIBMGA000406	0.38	56	4e-06	FBpp0310617	300436 mental retardation, x-linked 46; mrx46;
NP_004831.1	BGIBMGA001201	0.34	84	1e-06	FBpp0311634	300436 mental retardation, x-linked 46; mrx46;
NP_004831.1	BGIBMGA005906	0.4	382	9e-65	FBpp0307725	300436 mental retardation, x-linked 46; mrx46;
NP_004831.1	BGIBMGA007635	0.29	100	1e-06	FBpp0074449	300436 mental retardation, x-linked 46; mrx46;
NP_004831.1	BGIBMGA008050	0.34	104	9e-06	FBpp0073126	300436 mental retardation, x-linked 46; mrx46;
NP_004831.1	BGIBMGA010409	0.32	108	8e-07	FBpp0083275	300436 mental retardation, x-linked 46; mrx46;
ABM86450.1	BGIBMGA013517	0.36	337	2e-43	FBpp0080045	300472 corpus callosum, agenesis of, with mental retardation, ocular coloboma, and micrognathia;
NP_598006.1	BGIBMGA000308	0.39	183	1e-29	FBpp0099901	300491 epilepsy, x-linked, with variable learning disabilities and behavior disorders;
NP_598006.1	BGIBMGA000309	0.62	156	6e-55	FBpp0099901	300491 epilepsy, x-linked, with variable learning disabilities and behavior disorders;
NP_006508.1	BGIBMGA011011	0.4	352	7e-72	FBpp0291719	300523 allan-herndon-dudley syndrome; ahds;
NP_006508.1	BGIBMGA011321	0.25	200	4e-09	FBpp0087139	300523 allan-herndon-dudley syndrome; ahds;
NP_004178.2	BGIBMGA002097	0.26	152	1e-08	FBpp0076196	300534 mental retardation, x-linked, syndromic, claes-jensen type; mrxscj;
NP_004178.2	BGIBMGA002098	0.28	298	5e-31	FBpp0076196	300534 mental retardation, x-linked, syndromic, claes-jensen type; mrxscj;
ACE86790.1	BGIBMGA004558	0.47	1267	0	FBpp0311492	300534 mental retardation, x-linked, syndromic, claes-jensen type; mrxscj;
NP_004178.2	BGIBMGA005883	0.35	96	4e-08	FBpp0304067	300534 mental retardation, x-linked, syndromic, claes-jensen type; mrxscj;
NP_004178.2	BGIBMGA008774	0.33	242	2e-31	FBpp0302636	300534 mental retardation, x-linked, syndromic, claes-jensen type; mrxscj;
NP_004178.2	BGIBMGA010596	0.59	491	4e-176	FBpp0311492	300534 mental retardation, x-linked, syndromic, claes-jensen type; mrxscj;
NP_004178.2	BGIBMGA011343	0.52	46	6e-10	FBpp0307738	300534 mental retardation, x-linked, syndromic, claes-jensen type; mrxscj;
NP_001578.2	BGIBMGA006041	0.45	666	1e-164	FBpp0304837	300555 dent disease 2; 309000 lowe oculocerebrorenal syndrome; ocrl;
AAH94726.1	BGIBMGA010603	0.35	358	5e-50	FBpp0300559	300555 dent disease 2; 309000 lowe oculocerebrorenal syndrome; ocrl;
NP_002569.1	BGIBMGA000560	0.4	218	1e-35	FBpp0310694	300558 mental retardation, x-linked 30; mrx30;
NP_002569.1	BGIBMGA000872	0.28	195	9e-17	FBpp0290220	300558 mental retardation, x-linked 30; mrx30;
NP_002569.1	BGIBMGA003607	0.38	267	2e-38	FBpp0310694	300558 mental retardation, x-linked 30; mrx30;
BAG37693.1	BGIBMGA006914	0.38	111	2e-14	FBpp0074373	300558 mental retardation, x-linked 30; mrx30;
NP_002569.1	BGIBMGA007577	0.81	306	1e-145	FBpp0306611	300558 mental retardation, x-linked 30; mrx30;
NP_002569.1	BGIBMGA008506	0.5	313	2e-82	FBpp0074060	300558 mental retardation, x-linked 30; mrx30;
NP_002569.1	BGIBMGA010955	0.24	207	1e-11	FBpp0293540	300558 mental retardation, x-linked 30; mrx30;
NP_002569.1	BGIBMGA010956	0.64	260	3e-91	FBpp0293540	300558 mental retardation, x-linked 30; mrx30;
NP_002569.1	BGIBMGA012976	0.39	300	2e-46	FBpp0307673	300558 mental retardation, x-linked 30; mrx30;
NP_000282.1	BGIBMGA007681	0.76	394	5e-170	FBpp0306279	300653 phosphoglycerate kinase 1 deficiency;
NP_694984.4	BGIBMGA009575	0.38	476	4e-86	FBpp0083988	300659 mental retardation, x-linked 93; mrx93;
NP_075386.1	BGIBMGA003685	0.31	417	3e-40	FBpp0309967	300676 mental retardation, x-linked, syndromic 14; mrxs14;
NP_003482.1	BGIBMGA008494	0.34	127	2e-08	FBpp0302739	300855 ogden syndrome; ogdns;
NP_003482.1	BGIBMGA011824	0.83	155	8e-72	FBpp0076078	300855 ogden syndrome; ogdns;
NP_000160.1	BGIBMGA004000	0.43	373	6e-86	FBpp0086316	301500 fabry disease;
NP_000160.1	BGIBMGA013988	0.43	297	1e-77	FBpp0079549	301500 fabry disease;
NP_695012.1	BGIBMGA002755	0.39	162	3e-22	FBpp0082065	301830 spinal muscular atrophy, x-linked 2; smax2;
NP_695012.1	BGIBMGA008342	0.23	209	5e-09	FBpp0075938	301830 spinal muscular atrophy, x-linked 2; smax2;
NP_695012.1	BGIBMGA009911	0.65	1019	0	FBpp0087583	301830 spinal muscular atrophy, x-linked 2; smax2;
NP_695012.1	BGIBMGA011891	0.27	168	7e-10	FBpp0305606	301830 spinal muscular atrophy, x-linked 2; smax2;
NP_695012.1	BGIBMGA012116	0.32	290	5e-33	FBpp0076457	301830 spinal muscular atrophy, x-linked 2; smax2;
NP_695012.1	BGIBMGA012550	0.33	181	2e-23	FBpp0086711	301830 spinal muscular atrophy, x-linked 2; smax2;
NP_695012.1	BGIBMGA013537	0.28	115	3e-06	FBpp0073354	301830 spinal muscular atrophy, x-linked 2; smax2;
NP_002755.1	BGIBMGA001386	0.88	317	1e-159	FBpp0311282	301835 arts syndrome; arts; 311070 charcot-marie-tooth disease, x-linked recessive, 5; cmtx5; 304500 deafness, x-linked 1; dfnx1; 300661 phosphoribosylpyrophosphate synthetase superactivity;
NP_002755.1	BGIBMGA001570	0.74	317	8e-137	FBpp0311282	301835 arts syndrome; arts; 311070 charcot-marie-tooth disease, x-linked recessive, 5; cmtx5; 304500 deafness, x-linked 1; dfnx1; 300661 phosphoribosylpyrophosphate synthetase superactivity;
NP_002755.1	BGIBMGA014335	0.47	101	3e-20	FBpp0307424	301835 arts syndrome; arts; 311070 charcot-marie-tooth disease, x-linked recessive, 5; cmtx5; 304500 deafness, x-linked 1; dfnx1; 300661 phosphoribosylpyrophosphate synthetase superactivity;
BAD96889.1	BGIBMGA014442	0.5	201	4e-49	FBpp0307424	301835 arts syndrome; arts; 311070 charcot-marie-tooth disease, x-linked recessive, 5; cmtx5; 304500 deafness, x-linked 1; dfnx1; 300661 phosphoribosylpyrophosphate synthetase superactivity;
NP_115834.1	BGIBMGA001789	0.34	118	4e-12	FBpp0305674	301900 borjeson-forssman-lehmann syndrome; bfls;
NP_000381.1	BGIBMGA001126	0.4	416	2e-83	FBpp0085658	303100 choroideremia; chm;
CAB37831.1	BGIBMGA001924	0.31	374	1e-35	FBpp0305767	303350 masa syndrome; 304100 corpus callosum, partial agenesis of, x-linked; 307000 hydrocephalus due to congenital stenosis of aqueduct of sylvius; hsas;
NP_076493.1	BGIBMGA005772	0.28	267	2e-17	FBpp0305703	303350 masa syndrome; 304100 corpus callosum, partial agenesis of, x-linked; 307000 hydrocephalus due to congenital stenosis of aqueduct of sylvius; hsas;
CAA42508.1	BGIBMGA014065	0.28	726	7e-65	FBpp0305702	303350 masa syndrome; 304100 corpus callosum, partial agenesis of, x-linked; 307000 hydrocephalus due to congenital stenosis of aqueduct of sylvius; hsas;
AAI40939.1	BGIBMGA008437	0.31	277	4e-37	FBpp0083266	303700 blue cone monochromacy; bcm; 303800 colorblindness, partial, deutan series; cbd;
AAI40939.1	BGIBMGA008933	0.22	206	4e-08	FBpp0087618	303700 blue cone monochromacy; bcm; 303800 colorblindness, partial, deutan series; cbd;
NP_004420.1	BGIBMGA009670	0.38	107	6e-12	FBpp0088146	304110 craniofrontonasal syndrome; cfns;
NP_000298.2	BGIBMGA010300	0.68	53	2e-13	FBpp0309559	304400 deafness, x-linked 2; dfnx2;
CAA57767.1	BGIBMGA010868	0.6	295	7e-82	FBpp0303092	304400 deafness, x-linked 2; dfnx2;
NP_001005612.2	BGIBMGA003614	0.27	115	4e-06	FBpp0087494	305100 ectodermal dysplasia 1, hypohidrotic, x-linked; xhed; 313500 tooth agenesis, selective, x-linked, 1; sthagx1;
NP_004454.2	BGIBMGA002693	0.24	293	3e-09	FBpp0085412	305400 aarskog-scott syndrome; aas;
NP_004454.2	BGIBMGA005960	0.28	170	3e-06	FBpp0306189	305400 aarskog-scott syndrome; aas;
NP_976325.1	BGIBMGA000572	0.56	230	2e-75	FBpp0072428	307030 hyperglycerolemia;
NP_001121599.1	BGIBMGA004062	0.32	435	2e-59	FBpp0072858	307030 hyperglycerolemia;
NP_976325.1	BGIBMGA006727	0.22	457	7e-13	FBpp0301747	307030 hyperglycerolemia;
NP_001121599.1	BGIBMGA006858	0.57	213	2e-69	FBpp0297145	307030 hyperglycerolemia;
AAH71595.1	BGIBMGA008953	0.22	270	2e-10	FBpp0072428	307030 hyperglycerolemia;
NP_001121599.1	BGIBMGA013299	0.47	507	3e-128	FBpp0311803	307030 hyperglycerolemia;
BAG37008.1	BGIBMGA000972	0.39	59	5e-08	FBpp0303536	307200 isolated growth hormone deficiency, type iii; ighd3; 300755 agammaglobulinemia, x-linked; xla;
NP_000052.1	BGIBMGA000973	0.46	167	6e-30	FBpp0303536	307200 isolated growth hormone deficiency, type iii; ighd3; 300755 agammaglobulinemia, x-linked; xla;
CAA78509.1	BGIBMGA002190	0.38	99	6e-12	FBpp0082508	308800 keratosis follicularis spinulosa decalvans, x-linked; kfsdx;
NP_000275.1	BGIBMGA009515	0.55	379	1e-124	FBpp0070677	308930 leigh syndrome, x-linked; 312170 pyruvate dehydrogenase e1-alpha deficiency; pdhad;
CAB94714.1	BGIBMGA011235	0.44	1157	0	FBpp0306530	309400 menkes disease; 304150 occipital horn syndrome; ohs; 300489 spinal muscular atrophy, distal, x-linked 3; smax3;
NP_652766.1	BGIBMGA004982	0.4	115	2e-26	FBpp0084140	309500 renpenning syndrome 1; rens1;
BAG63815.1	BGIBMGA007554	0.46	254	4e-59	FBpp0074653	309520 lujan-fryns syndrome; 305450 opitz-kaveggia syndrome; oks;
NP_005111.2	BGIBMGA014277	0.44	102	5e-13	FBpp0074653	309520 lujan-fryns syndrome; 305450 opitz-kaveggia syndrome; oks;
NP_001484.1	BGIBMGA001119	0.68	447	2e-162	FBpp0311558	309541 html::element=hash(0x1605d78);
NP_004586.2	BGIBMGA005897	0.27	228	6e-11	FBpp0297149	309583 mental retardation, x-linked, syndromic, snyder-robinson type; mrxssr;
NP_004586.2	BGIBMGA012707	0.38	155	2e-24	FBpp0312081	309583 mental retardation, x-linked, syndromic, snyder-robinson type; mrxssr;
NP_004586.2	BGIBMGA012708	0.41	148	3e-32	FBpp0312082	309583 mental retardation, x-linked, syndromic, snyder-robinson type; mrxssr;
NP_005324.3	BGIBMGA009964	0.57	266	1e-74	FBpp0307185	309801 microphthalmia, syndromic 7; mcops7;
NP_000193.1	BGIBMGA001291	0.47	511	5e-120	FBpp0072939	309900 mucopolysaccharidosis type ii;
NP_000243.1	BGIBMGA014084	0.29	407	5e-34	FBpp0289662	310400 myopathy, centronuclear, x-linked; cnmx;
NP_004076.1	BGIBMGA003070	0.33	73	2e-07	FBpp0110179	311150 opticoacoustic nerve atrophy with dementia; 304700 mohr-tranebjaerg syndrome; mts;
NP_004076.1	BGIBMGA014607	0.56	68	3e-18	FBpp0310233	311150 opticoacoustic nerve atrophy with dementia; 304700 mohr-tranebjaerg syndrome; mts;
NP_955772.1	BGIBMGA007755	0.24	230	2e-09	FBpp0304959	312080 pelizaeus-merzbacher disease; pmd; 312920 spastic paraplegia 2, x-linked; spg2;
NP_055378.1	BGIBMGA008717	0.69	138	5e-55	FBpp0075246	313400 spondyloepiphyseal dysplasia tarda, x-linked; sedt;
NP_620278.1	BGIBMGA003378	0.38	82	4e-09	FBpp0085185	314250 dystonia 3, torsion, x-linked; dyt3;
NP_620278.1	BGIBMGA007052	0.5	1610	0	FBpp0311434	314250 dystonia 3, torsion, x-linked; dyt3;
NP_620278.1	BGIBMGA013538	0.36	78	5e-09	FBpp0079111	314250 dystonia 3, torsion, x-linked; dyt3;
NP_078790.2	BGIBMGA000640	0.37	190	3e-33	FBpp0074694	600081 vitamin d hydroxylation-deficient rickets, type 1b; vddr1b;
NP_751895.1	BGIBMGA003731	0.48	510	5e-124	FBpp0301793	600101 deafness, autosomal dominant 2a; dfna2a;
NP_036365.1	BGIBMGA003034	0.3	485	3e-63	FBpp0077582	600118 warburg micro syndrome 1; warbm1;
NP_036365.1	BGIBMGA003035	0.43	295	3e-57	FBpp0077582	600118 warburg micro syndrome 1; warbm1;
AAC04277.1	BGIBMGA006511	0.32	290	6e-34	FBpp0311074	600274 frontotemporal dementia; ftd; 172700 pick disease of brain; 260540 parkinson-dementia syndrome; 601104 supranuclear palsy, progressive, 1; psnp1; 168600 parkinson disease, late-onset; pd;
NP_006028.2	BGIBMGA005759	0.34	386	2e-56	FBpp0298372	600430 brachydactyly-mental retardation syndrome; bdmr;
NP_006028.2	BGIBMGA009398	0.27	160	8e-08	FBpp0293582	600430 brachydactyly-mental retardation syndrome; bdmr;
NP_006028.2	BGIBMGA009917	0.51	369	1e-97	FBpp0300800	600430 brachydactyly-mental retardation syndrome; bdmr;
NP_006028.2	BGIBMGA011747	0.35	143	2e-17	FBpp0073173	600430 brachydactyly-mental retardation syndrome; bdmr;
NP_006028.2	BGIBMGA013166	0.27	281	1e-20	FBpp0078414	600430 brachydactyly-mental retardation syndrome; bdmr;
NP_079491.2	BGIBMGA008689	0.46	324	6e-75	FBpp0291529	600462 myopathy, lactic acidosis, and sideroblastic anemia 1; mlasa1;
BAF83388.1	BGIBMGA010612	0.35	85	2e-10	FBpp0296961	600501 abcd syndrome; abcds; 277580 waardenburg syndrome, type 4a; ws4a; 600155 hirschsprung disease, susceptibility to, 2; hscr2;
NP_003982.1	BGIBMGA011934	0.26	87	9e-06	FBpp0300658	600501 abcd syndrome; abcds; 277580 waardenburg syndrome, type 4a; ws4a; 600155 hirschsprung disease, susceptibility to, 2; hscr2;
NP_079005.3	BGIBMGA005536	0.52	122	6e-30	FBpp0297531	600652 deafness, autosomal dominant 4a; dfna4a;
NP_689996.4	BGIBMGA009966	0.53	474	3e-147	FBpp0070367	600721 d-2-hydroxyglutaric aciduria 1;
NP_000432.1	BGIBMGA002794	0.31	248	8e-27	FBpp0088515	600791 deafness, autosomal recessive 4, with enlarged vestibular aqueduct; dfnb4; 274600 pendred syndrome; pds;
AAH21670.1	BGIBMGA008780	0.25	157	2e-08	FBpp0304477	600886 hyperferritinemia with or without cataract; 606159 neurodegeneration with brain iron accumulation 3; nbia3;
BAC53753.1	BGIBMGA002532	0.27	141	1e-08	FBpp0293263	600920 van den ende-gupta syndrome; vdegs;
BAC53753.1	BGIBMGA012538	0.32	400	2e-66	FBpp0306205	600920 van den ende-gupta syndrome; vdegs;
NP_005996.2	BGIBMGA002273	0.22	756	1e-35	FBpp0291996	600965 deafness, autosomal dominant 6; dfna6; 222300 wolfram syndrome 1; wfs1; 125853 diabetes mellitus, noninsulin-dependent; niddm;
NP_000103.2	BGIBMGA003960	0.22	435	8e-23	FBpp0293017	600972 achondrogenesis, type ib; acg1b; 256050 atelosteogenesis, type ii; aoii; 222600 diastrophic dysplasia; 226900 epiphyseal dysplasia, multiple, 4; edm4;
NP_000103.2	BGIBMGA007037	0.48	50	2e-07	FBpp0304956	600972 achondrogenesis, type ib; acg1b; 256050 atelosteogenesis, type ii; aoii; 222600 diastrophic dysplasia; 226900 epiphyseal dysplasia, multiple, 4; edm4;
NP_000103.2	BGIBMGA007041	0.25	499	3e-33	FBpp0293017	600972 achondrogenesis, type ib; acg1b; 256050 atelosteogenesis, type ii; aoii; 222600 diastrophic dysplasia; 226900 epiphyseal dysplasia, multiple, 4; edm4;
NP_919224.1	BGIBMGA002128	0.28	165	2e-12	FBpp0271797	601071 deafness, autosomal recessive 9; dfnb9;
NP_919304.1	BGIBMGA002129	0.46	78	3e-14	FBpp0271799	601071 deafness, autosomal recessive 9; dfnb9;
NP_919224.1	BGIBMGA012257	0.76	51	3e-19		601071 deafness, autosomal recessive 9; dfnb9;
NP_919303.1	BGIBMGA012258	0.67	490	0	FBpp0271799	601071 deafness, autosomal recessive 9; dfnb9;
NP_005778.1	BGIBMGA007575	0.7	53	6e-18	FBpp0072004	601110 congenital disorder of glycosylation, type id; cdg1d;
NP_001120652.1	BGIBMGA003044	0.64	2114	0	FBpp0310275	601317 deafness, autosomal dominant 11; dfna11; 600060 deafness, autosomal recessive 2; dfnb2; 276900 usher syndrome, type i; ush1;
NP_001120652.1	BGIBMGA004656	0.29	224	2e-26	FBpp0292925	601317 deafness, autosomal dominant 11; dfna11; 600060 deafness, autosomal recessive 2; dfnb2; 276900 usher syndrome, type i; ush1;
NP_001120652.1	BGIBMGA004713	0.34	103	5e-09	FBpp0083438	601317 deafness, autosomal dominant 11; dfna11; 600060 deafness, autosomal recessive 2; dfnb2; 276900 usher syndrome, type i; ush1;
NP_001120652.1	BGIBMGA004845	0.37	645	2e-115	FBpp0291459	601317 deafness, autosomal dominant 11; dfna11; 600060 deafness, autosomal recessive 2; dfnb2; 276900 usher syndrome, type i; ush1;
NP_001120652.1	BGIBMGA005995	0.49	2160	0	FBpp0310275	601317 deafness, autosomal dominant 11; dfna11; 600060 deafness, autosomal recessive 2; dfnb2; 276900 usher syndrome, type i; ush1;
NP_958438.1	BGIBMGA003376	0.32	518	1e-63	FBpp0290364	601382 charcot-marie-tooth disease, type 4b1; cmt4b1;
NP_958438.1	BGIBMGA007847	0.52	524	1e-135	FBpp0311457	601382 charcot-marie-tooth disease, type 4b1; cmt4b1;
NP_958438.1	BGIBMGA009288	0.43	462	2e-99	FBpp0111853	601382 charcot-marie-tooth disease, type 4b1; cmt4b1;
NP_958438.1	BGIBMGA013250	0.43	368	1e-75	FBpp0310622	601382 charcot-marie-tooth disease, type 4b1; cmt4b1;
NP_001674.2	BGIBMGA004533	0.65	244	2e-78	FBpp0289786	601386 deafness, autosomal recessive 12; dfnb12;
NP_001674.2	BGIBMGA004534	0.67	758	0	FBpp0289784	601386 deafness, autosomal recessive 12; dfnb12;
NP_071407.4	BGIBMGA000467	0.34	787	2e-95	FBpp0308549	601386 deafness, autosomal recessive 12; dfnb12; 601067 usher syndrome, type id; ush1d;
EAW54429.1	BGIBMGA002162	0.25	422	9e-19	FBpp0308367	601386 deafness, autosomal recessive 12; dfnb12; 601067 usher syndrome, type id; ush1d;
NP_071407.4	BGIBMGA002748	0.26	1125	8e-74	FBpp0290916	601386 deafness, autosomal recessive 12; dfnb12; 601067 usher syndrome, type id; ush1d;
NP_071407.4	BGIBMGA002950	0.3	770	6e-64	FBpp0080568	601386 deafness, autosomal recessive 12; dfnb12; 601067 usher syndrome, type id; ush1d;
AAH65284.1	BGIBMGA002952	0.27	793	1e-53	FBpp0099721	601386 deafness, autosomal recessive 12; dfnb12; 601067 usher syndrome, type id; ush1d;
NP_071407.4	BGIBMGA010266	0.28	754	4e-58	FBpp0071475	601386 deafness, autosomal recessive 12; dfnb12; 601067 usher syndrome, type id; ush1d;
AAG27034.2	BGIBMGA010415	0.28	1721	2e-156	FBpp0310684	601386 deafness, autosomal recessive 12; dfnb12; 601067 usher syndrome, type id; ush1d;
BAB47441.1	BGIBMGA010452	0.35	219	2e-20	FBpp0309926	601386 deafness, autosomal recessive 12; dfnb12; 601067 usher syndrome, type id; ush1d;
Q5SQD0	BGIBMGA010453	0.3	2063	0	FBpp0309926	601386 deafness, autosomal recessive 12; dfnb12; 601067 usher syndrome, type id; ush1d;
NP_071407.4	BGIBMGA010597	0.32	1263	1e-136	FBpp0077167	601386 deafness, autosomal recessive 12; dfnb12; 601067 usher syndrome, type id; ush1d;
NP_071407.4	BGIBMGA010874	0.28	1317	7e-99	FBpp0301170	601386 deafness, autosomal recessive 12; dfnb12; 601067 usher syndrome, type id; ush1d;
NP_071407.4	BGIBMGA013573	0.26	1722	2e-137	FBpp0081987	601386 deafness, autosomal recessive 12; dfnb12; 601067 usher syndrome, type id; ush1d;
NP_071407.4	BGIBMGA013616	0.23	766	2e-20	FBpp0310684	601386 deafness, autosomal recessive 12; dfnb12; 601067 usher syndrome, type id; ush1d;
NP_071407.4	BGIBMGA013730	0.26	1765	4e-100	FBpp0311915	601386 deafness, autosomal recessive 12; dfnb12; 601067 usher syndrome, type id; ush1d;
NP_006087.2	BGIBMGA000597	0.4	204	2e-38	FBpp0088651	601455 charcot-marie-tooth disease, type 4d; cmt4d;
NP_006087.2	BGIBMGA004682	0.31	267	2e-31	FBpp0290131	601455 charcot-marie-tooth disease, type 4d; cmt4d;
NP_006087.2	BGIBMGA004945	0.4	282	3e-51	FBpp0088651	601455 charcot-marie-tooth disease, type 4d; cmt4d;
NP_001745.2	BGIBMGA008906	0.78	118	3e-47	FBpp0311837	601626 leukemia, acute myeloid; aml; 601399 platelet disorder, familial, with associated myeloid malignancy;
NP_001745.2	BGIBMGA008970	0.75	95	1e-37	FBpp0303587	601626 leukemia, acute myeloid; aml; 601399 platelet disorder, familial, with associated myeloid malignancy;
NP_060311.1	BGIBMGA001236	0.56	111	1e-28	FBpp0087881	601650 paragangliomas 2; pgl2;
NP_000113.1	BGIBMGA011797	0.69	478	0	FBpp0113091	601675 trichothiodystrophy, photosensitive; ttdp; 610651 xeroderma pigmentosum, complementation group b; xpb;
NP_003273.1	BGIBMGA001031	0.31	103	2e-07	FBpp0074299	601680 arthrogryposis, distal, type 2b; da2b;
NP_006748.1	BGIBMGA013700	0.4	119	2e-14	FBpp0291137	601680 arthrogryposis, distal, type 2b; da2b;
NP_569735.1	BGIBMGA001902	0.27	214	1e-14	FBpp0304916	601776 html::element=hash(0x12718b0);
BAC11172.1	BGIBMGA003101	0.52	89	2e-18	FBpp0309156	601776 html::element=hash(0x12718b0);
NP_569735.1	BGIBMGA009973	0.32	160	7e-15	FBpp0303005	601776 html::element=hash(0x12718b0);
NP_000171.1	BGIBMGA001255	0.32	237	5e-22	FBpp0304773	601777 cone-rod dystrophy 6; cord6; 204000 leber congenital amaurosis 1; lca1;
NP_000171.1	BGIBMGA002064	0.32	183	5e-20	FBpp0298357	601777 cone-rod dystrophy 6; cord6; 204000 leber congenital amaurosis 1; lca1;
NP_000171.1	BGIBMGA002197	0.54	509	1e-151	FBpp0307226	601777 cone-rod dystrophy 6; cord6; 204000 leber congenital amaurosis 1; lca1;
NP_000171.1	BGIBMGA003315	0.35	148	3e-20	FBpp0305813	601777 cone-rod dystrophy 6; cord6; 204000 leber congenital amaurosis 1; lca1;
NP_000171.1	BGIBMGA009302	0.45	201	6e-38	FBpp0085115	601777 cone-rod dystrophy 6; cord6; 204000 leber congenital amaurosis 1; lca1;
NP_000171.1	BGIBMGA009865	0.53	241	8e-57	FBpp0099611	601777 cone-rod dystrophy 6; cord6; 204000 leber congenital amaurosis 1; lca1;
NP_000171.1	BGIBMGA012087	0.3	242	2e-23	FBpp0074666	601777 cone-rod dystrophy 6; cord6; 204000 leber congenital amaurosis 1; lca1;
BAG52685.1	BGIBMGA002346	0.34	223	1e-28	FBpp0082167	601815 phosphoglycerate dehydrogenase deficiency;
AAD51415.1	BGIBMGA012309	0.5	304	4e-87	FBpp0079809	601815 phosphoglycerate dehydrogenase deficiency;
NP_573568.1	BGIBMGA000396	0.56	43	9e-08	FBpp0308405	601869 deafness, autosomal recessive 15; dfnb15;
NP_573568.1	BGIBMGA000397	0.53	221	1e-60	FBpp0308405	601869 deafness, autosomal recessive 15; dfnb15;
AAC50535.1	BGIBMGA002620	0.58	50	1e-12	FBpp0099683	602080 paget disease of bone; pdb;
NP_710142.1	BGIBMGA000928	0.37	198	5e-29	FBpp0307915	602092 deafness, autosomal recessive 18a; dfnb18a; 276904 usher syndrome, type ic; ush1c;
NP_055577.1	BGIBMGA005735	0.54	493	5e-146		602398 desmosterolosis;
NP_055577.1	BGIBMGA012624	0.4	484	3e-92		602398 desmosterolosis;
NP_055861.3	BGIBMGA001540	0.28	539	7e-41	FBpp0309612	602433 amyotrophic lateral sclerosis 4, juvenile; als4; 606002 spinocerebellar ataxia, autosomal recessive 1; scar1;
NP_055861.3	BGIBMGA004963	0.23	506	6e-18	FBpp0290264	602433 amyotrophic lateral sclerosis 4, juvenile; als4; 606002 spinocerebellar ataxia, autosomal recessive 1; scar1;
NP_055861.3	BGIBMGA005056	0.3	293	2e-25	FBpp0289505	602433 amyotrophic lateral sclerosis 4, juvenile; als4; 606002 spinocerebellar ataxia, autosomal recessive 1; scar1;
NP_055861.3	BGIBMGA011671	0.29	481	3e-37	FBpp0271876	602433 amyotrophic lateral sclerosis 4, juvenile; als4; 606002 spinocerebellar ataxia, autosomal recessive 1; scar1;
NP_055112.2	BGIBMGA008316	0.62	224	1e-79	FBpp0288428	602473 encephalopathy, ethylmalonic; ee;
AAP15181.1	BGIBMGA001488	0.45	120	1e-25	FBpp0088311	602482 axenfeld-rieger syndrome, type 3; rieg3; 601631 iridogoniodysgenesis, type 1; irid1;
AAC72915.1	BGIBMGA005101	0.47	180	9e-42	FBpp0311419	602482 axenfeld-rieger syndrome, type 3; rieg3; 601631 iridogoniodysgenesis, type 1; irid1;
NP_005189.2	BGIBMGA001219	0.31	245	1e-28	FBpp0310123	602541 muscular dystrophy, congenital, megaconial type; mdcmc;
NP_005189.2	BGIBMGA011364	0.44	290	8e-71	FBpp0293955	602541 muscular dystrophy, congenital, megaconial type; mdcmc;
NP_060575.1	BGIBMGA011324	0.34	82	2e-06		602629 dystonia 6, torsion; dyt6;
NP_003409.1	BGIBMGA001816	0.4	59	4e-06		602668 myotonic dystrophy 2; dm2;
BAB70769.1	BGIBMGA004191	0.42	142	2e-32	FBpp0292516	602668 myotonic dystrophy 2; dm2;
NP_003409.1	BGIBMGA005815	0.33	87	1e-09	FBpp0087473	602668 myotonic dystrophy 2; dm2;
NP_003986.2	BGIBMGA002066	0.32	228	1e-19	FBpp0298357	602875 acromesomelic dysplasia, maroteaux type; amdm;
NP_003986.2	BGIBMGA003982	0.55	466	3e-139	FBpp0271905	602875 acromesomelic dysplasia, maroteaux type; amdm;
NP_003986.2	BGIBMGA005542	0.48	85	2e-14	FBpp0293332	602875 acromesomelic dysplasia, maroteaux type; amdm;
NP_003986.2	BGIBMGA006212	0.29	195	1e-11	FBpp0085252	602875 acromesomelic dysplasia, maroteaux type; amdm;
NP_003986.2	BGIBMGA006322	0.35	203	1e-25	FBpp0110263	602875 acromesomelic dysplasia, maroteaux type; amdm;
NP_003986.2	BGIBMGA006555	0.3	212	3e-16	FBpp0305813	602875 acromesomelic dysplasia, maroteaux type; amdm;
NP_003986.2	BGIBMGA006799	0.42	715	2e-153	FBpp0293332	602875 acromesomelic dysplasia, maroteaux type; amdm;
BAA81737.1	BGIBMGA006801	0.29	582	5e-52	FBpp0306011	602875 acromesomelic dysplasia, maroteaux type; amdm;
BAA81737.1	BGIBMGA006891	0.4	831	9e-161	FBpp0306011	602875 acromesomelic dysplasia, maroteaux type; amdm;
NP_003986.2	BGIBMGA009300	0.44	222	4e-44	FBpp0084819	602875 acromesomelic dysplasia, maroteaux type; amdm;
NP_003986.2	BGIBMGA009867	0.57	110	3e-31	FBpp0311979	602875 acromesomelic dysplasia, maroteaux type; amdm;
BAA81737.1	BGIBMGA010092	0.61	474	1e-141	FBpp0311979	602875 acromesomelic dysplasia, maroteaux type; amdm;
NP_003986.2	BGIBMGA010125	0.69	258	4e-95	FBpp0311979	602875 acromesomelic dysplasia, maroteaux type; amdm;
NP_003986.2	BGIBMGA010713	0.47	250	4e-57	FBpp0306946	602875 acromesomelic dysplasia, maroteaux type; amdm;
NP_003986.2	BGIBMGA012086	0.31	194	2e-19	FBpp0293288	602875 acromesomelic dysplasia, maroteaux type; amdm;
NP_037471.2	BGIBMGA013074	0.45	457	3e-112	FBpp0304502	603147 congenital disorder of glycosylation, type ic; cdg1c;
AAA35900.1	BGIBMGA003218	0.47	72	2e-06	FBpp0305196	603513 cerebral palsy, spastic quadriplegic, 1; cpsq1;
NP_000808.2	BGIBMGA003219	0.62	214	1e-77	FBpp0305196	603513 cerebral palsy, spastic quadriplegic, 1; cpsq1;
NP_000808.2	BGIBMGA003220	0.52	165	9e-48	FBpp0305196	603513 cerebral palsy, spastic quadriplegic, 1; cpsq1;
AAA35900.1	BGIBMGA010122	0.42	475	5e-113	FBpp0077837	603513 cerebral palsy, spastic quadriplegic, 1; cpsq1;
AAA35900.1	BGIBMGA012088	0.52	494	8e-139	FBpp0309589	603513 cerebral palsy, spastic quadriplegic, 1; cpsq1;
NP_037368.1	BGIBMGA009353	0.23	330	4e-13	FBpp0309239	603516 spinocerebellar ataxia 10; sca10;
NP_001029027.1	BGIBMGA001792	0.36	130	2e-21	FBpp0078337	603554 omenn syndrome; 602450 severe combined immunodeficiency with sensitivity to ionizing radiation;
NP_001029027.1	BGIBMGA012879	0.39	76	3e-08	FBpp0078337	603554 omenn syndrome; 602450 severe combined immunodeficiency with sensitivity to ionizing radiation;
NP_002464.1	BGIBMGA001248	0.22	578	9e-19	FBpp0304727	603622 deafness, autosomal dominant 17; dfna17; 153650 epstein syndrome; 153640 fechtner syndrome; ftns; 600208 macrothrombocytopenia and progressive sensorineural deafness; 155100 may-hegglin anomaly; mha; 605249 sebastian syndrome; sbs;
NP_002464.1	BGIBMGA004128	0.22	993	4e-30	FBpp0300648	603622 deafness, autosomal dominant 17; dfna17; 153650 epstein syndrome; 153640 fechtner syndrome; ftns; 600208 macrothrombocytopenia and progressive sensorineural deafness; 155100 may-hegglin anomaly; mha; 605249 sebastian syndrome; sbs;
NP_002464.1	BGIBMGA008130	0.24	245	6e-06	FBpp0074160	603622 deafness, autosomal dominant 17; dfna17; 153650 epstein syndrome; 153640 fechtner syndrome; ftns; 600208 macrothrombocytopenia and progressive sensorineural deafness; 155100 may-hegglin anomaly; mha; 605249 sebastian syndrome; sbs;
AAA36349.1	BGIBMGA010009	0.26	312	2e-10	FBpp0311223	603622 deafness, autosomal dominant 17; dfna17; 153650 epstein syndrome; 153640 fechtner syndrome; ftns; 600208 macrothrombocytopenia and progressive sensorineural deafness; 155100 may-hegglin anomaly; mha; 605249 sebastian syndrome; sbs;
CAD89954.1	BGIBMGA010438	0.25	181	1e-06	FBpp0308352	603622 deafness, autosomal dominant 17; dfna17; 153650 epstein syndrome; 153640 fechtner syndrome; ftns; 600208 macrothrombocytopenia and progressive sensorineural deafness; 155100 may-hegglin anomaly; mha; 605249 sebastian syndrome; sbs;
NP_002464.1	BGIBMGA013779	0.19	1005	2e-37	FBpp0293597	603622 deafness, autosomal dominant 17; dfna17; 153650 epstein syndrome; 153640 fechtner syndrome; ftns; 600208 macrothrombocytopenia and progressive sensorineural deafness; 155100 may-hegglin anomaly; mha; 605249 sebastian syndrome; sbs;
NP_065098.1	BGIBMGA000300	0.34	400	2e-63	FBpp0086469	603896 leukoencephalopathy with vanishing white matter; vwm;
EAW98425.1	BGIBMGA002478	0.31	245	6e-15	FBpp0306623	603896 leukoencephalopathy with vanishing white matter; vwm;
NP_001405.1	BGIBMGA006462	0.51	305	2e-80	FBpp0084874	603896 leukoencephalopathy with vanishing white matter; vwm;
NP_003898.2	BGIBMGA001197	0.36	268	2e-44	FBpp0089217	603896 leukoencephalopathy with vanishing white matter; vwm;
NP_003898.2	BGIBMGA008682	0.25	91	3e-07	FBpp0078399	603896 leukoencephalopathy with vanishing white matter; vwm;
NP_055054.1	BGIBMGA012168	0.33	340	4e-40	FBpp0070457	603896 leukoencephalopathy with vanishing white matter; vwm;
NP_751945.2	BGIBMGA002719	0.48	343	3e-66	FBpp0291521	603896 leukoencephalopathy with vanishing white matter; vwm;
NP_430255.2	BGIBMGA004108	0.46	362	2e-68	FBpp0310097	604168 congenital cataracts, facial dysmorphism, and neuropathy;
NP_430255.2	BGIBMGA009640	0.34	94	1e-08	FBpp0305756	604168 congenital cataracts, facial dysmorphism, and neuropathy;
NP_430255.2	BGIBMGA014117	0.27	147	4e-06	FBpp0076921	604168 congenital cataracts, facial dysmorphism, and neuropathy;
EAW82963.1	BGIBMGA010860	0.43	124	1e-08	FBpp0075313	604173 poikiloderma with neutropenia; pn;
AAH18043.1	BGIBMGA001983	0.28	373	7e-37	FBpp0079243	604218 encephalopathy, familial, with neuroserpin inclusion bodies; fenib;
AAH18043.1	BGIBMGA003292	0.25	276	6e-07		604218 encephalopathy, familial, with neuroserpin inclusion bodies; fenib;
AAH18043.1	BGIBMGA004735	0.2	302	8e-12	FBpp0089192	604218 encephalopathy, familial, with neuroserpin inclusion bodies; fenib;
AAH18043.1	BGIBMGA007720	0.34	321	7e-42	FBpp0089192	604218 encephalopathy, familial, with neuroserpin inclusion bodies; fenib;
AAH18043.1	BGIBMGA009953	0.32	314	2e-47	FBpp0289565	604218 encephalopathy, familial, with neuroserpin inclusion bodies; fenib;
AAH18043.1	BGIBMGA010213	0.29	299	2e-30	FBpp0085912	604218 encephalopathy, familial, with neuroserpin inclusion bodies; fenib;
NP_005016.1	BGIBMGA010216	0.29	373	3e-34	FBpp0085524	604218 encephalopathy, familial, with neuroserpin inclusion bodies; fenib;
NP_036196.1	BGIBMGA008236	0.35	220	9e-34	FBpp0308570	604219 cataract 9, multiple types; ctrct9;
NP_036196.1	BGIBMGA012456	0.38	213	6e-29	FBpp0307864	604219 cataract 9, multiple types; ctrct9;
NP_663729.1	BGIBMGA003158	0.42	240	4e-44	FBpp0303527	604273 mitochondrial complex v (atp synthase) deficiency, nuclear type 1; mc5dn1;
NP_003750.1	BGIBMGA002073	0.45	140	5e-27	FBpp0076053	604278 renal tubular acidosis, proximal, with ocular abnormalities and mental retardation;
NP_003750.1	BGIBMGA006005	0.54	670	0	FBpp0304053	604278 renal tubular acidosis, proximal, with ocular abnormalities and mental retardation;
NP_775907.4	BGIBMGA008224	0.29	171	3e-09	FBpp0303172	604317 microcephaly 2, primary, autosomal recessive, with or without cortical malformations; mcph2;
NP_775907.4	BGIBMGA011136	0.43	673	6e-159	FBpp0305222	604317 microcephaly 2, primary, autosomal recessive, with or without cortical malformations; mcph2;
BAH12040.1	BGIBMGA010831	0.76	437	0	FBpp0311386	604326 spinocerebellar ataxia 12; sca12;
NP_079413.3	BGIBMGA006780	0.21	823	3e-30	FBpp0309872	604360 spastic paraplegia 11, autosomal recessive; spg11;
NP_002702.2	BGIBMGA009594	0.25	167	1e-07	FBpp0305251	604367 lipodystrophy, familial partial, type 3; fpld3;
NP_002702.2	BGIBMGA011660	0.33	168	3e-19	FBpp0311540	604367 lipodystrophy, familial partial, type 3; fpld3;
NP_036566.1	BGIBMGA002962	0.39	69	3e-10	FBpp0085819	604369 sialuria, finnish type; 269920 infantile sialic acid storage disorder;
NP_036566.1	BGIBMGA004858	0.34	287	8e-45	FBpp0083395	604369 sialuria, finnish type; 269920 infantile sialic acid storage disorder;
NP_036566.1	BGIBMGA005389	0.41	449	2e-98	FBpp0308734	604369 sialuria, finnish type; 269920 infantile sialic acid storage disorder;
NP_036566.1	BGIBMGA007270	0.4	444	4e-92	FBpp0079876	604369 sialuria, finnish type; 269920 infantile sialic acid storage disorder;
NP_036566.1	BGIBMGA007278	0.38	438	2e-83	FBpp0079876	604369 sialuria, finnish type; 269920 infantile sialic acid storage disorder;
NP_036566.1	BGIBMGA007279	0.49	76	8e-08	FBpp0080090	604369 sialuria, finnish type; 269920 infantile sialic acid storage disorder;
NP_036566.1	BGIBMGA007280	0.38	262	1e-48	FBpp0079876	604369 sialuria, finnish type; 269920 infantile sialic acid storage disorder;
NP_036566.1	BGIBMGA007281	0.37	432	2e-81	FBpp0079876	604369 sialuria, finnish type; 269920 infantile sialic acid storage disorder;
NP_036566.1	BGIBMGA007282	0.34	430	1e-59	FBpp0079876	604369 sialuria, finnish type; 269920 infantile sialic acid storage disorder;
NP_036566.1	BGIBMGA007427	0.35	112	2e-20	FBpp0307796	604369 sialuria, finnish type; 269920 infantile sialic acid storage disorder;
NP_036566.1	BGIBMGA007428	0.37	161	7e-28	FBpp0307796	604369 sialuria, finnish type; 269920 infantile sialic acid storage disorder;
NP_036566.1	BGIBMGA007462	0.39	457	3e-86	FBpp0077623	604369 sialuria, finnish type; 269920 infantile sialic acid storage disorder;
NP_036566.1	BGIBMGA008869	0.35	388	2e-66	FBpp0307618	604369 sialuria, finnish type; 269920 infantile sialic acid storage disorder;
NP_036566.1	BGIBMGA008871	0.36	385	7e-61	FBpp0307618	604369 sialuria, finnish type; 269920 infantile sialic acid storage disorder;
NP_036566.1	BGIBMGA008872	0.28	390	6e-47	FBpp0307618	604369 sialuria, finnish type; 269920 infantile sialic acid storage disorder;
NP_036566.1	BGIBMGA010861	0.43	437	2e-101	FBpp0083297	604369 sialuria, finnish type; 269920 infantile sialic acid storage disorder;
NP_036566.1	BGIBMGA014105	0.43	432	7e-99	FBpp0309074	604369 sialuria, finnish type; 269920 infantile sialic acid storage disorder;
BAG38135.1	BGIBMGA014243	0.37	204	2e-30	FBpp0309428	604369 sialuria, finnish type; 269920 infantile sialic acid storage disorder;
NP_036566.1	BGIBMGA014244	0.35	431	7e-69	FBpp0085815	604369 sialuria, finnish type; 269920 infantile sialic acid storage disorder;
NP_036566.1	BGIBMGA014245	0.35	431	3e-69	FBpp0085815	604369 sialuria, finnish type; 269920 infantile sialic acid storage disorder;
NP_036566.1	BGIBMGA014246	0.36	429	7e-59	FBpp0087925	604369 sialuria, finnish type; 269920 infantile sialic acid storage disorder;
NP_036566.1	BGIBMGA014248	0.37	282	5e-40	FBpp0309428	604369 sialuria, finnish type; 269920 infantile sialic acid storage disorder;
NP_036566.1	BGIBMGA014257	0.32	208	3e-30	FBpp0293293	604369 sialuria, finnish type; 269920 infantile sialic acid storage disorder;
NP_036566.1	BGIBMGA014259	0.28	458	1e-52	FBpp0309428	604369 sialuria, finnish type; 269920 infantile sialic acid storage disorder;
NP_640341.1	BGIBMGA003664	0.38	246	3e-38	FBpp0084449	604379 hypotrichosis 7; hypt7;
NP_640341.1	BGIBMGA003917	0.3	220	8e-21	FBpp0074166	604379 hypotrichosis 7; hypt7;
NP_640341.1	BGIBMGA008382	0.32	316	3e-32	FBpp0309480	604379 hypotrichosis 7; hypt7;
NP_640341.1	BGIBMGA009136	0.3	217	4e-22	FBpp0304014	604379 hypotrichosis 7; hypt7;
NP_640341.1	BGIBMGA010601	0.3	241	2e-24	FBpp0297922	604379 hypotrichosis 7; hypt7;
NP_640341.1	BGIBMGA010633	0.38	115	2e-14	FBpp0297144	604379 hypotrichosis 7; hypt7;
NP_640341.1	BGIBMGA011864	0.31	240	1e-24	FBpp0297144	604379 hypotrichosis 7; hypt7;
NP_005582.1	BGIBMGA001084	0.41	523	3e-107	FBpp0079802	604391 ataxia-telangiectasia-like disorder; atld;
NP_055151.3	BGIBMGA005285	0.36	321	3e-57	FBpp0303439	604393 leber congenital amaurosis 4; lca4;
NP_775771.3	BGIBMGA001512	0.31	303	1e-33	FBpp0082719	604432 spinocerebellar ataxia 11; sca11;
NP_775771.3	BGIBMGA007304	0.36	281	3e-39	FBpp0306615	604432 spinocerebellar ataxia 11; sca11;
NP_775771.3	BGIBMGA011373	0.58	308	7e-84	FBpp0305127	604432 spinocerebellar ataxia 11; sca11;
NP_775771.3	BGIBMGA014220	0.39	283	6e-44	FBpp0311373	604432 spinocerebellar ataxia 11; sca11;
NP_112224.1	BGIBMGA000579	0.28	294	2e-15	FBpp0297474	604563 charcot-marie-tooth disease, type 4b2; cmt4b2;
NP_112224.1	BGIBMGA000975	0.24	276	1e-15	FBpp0072618	604563 charcot-marie-tooth disease, type 4b2; cmt4b2;
NP_112224.1	BGIBMGA001194	0.27	317	5e-19	FBpp0298038	604563 charcot-marie-tooth disease, type 4b2; cmt4b2;
NP_112224.1	BGIBMGA001510	0.27	408	2e-21	FBpp0310013	604563 charcot-marie-tooth disease, type 4b2; cmt4b2;
NP_112224.1	BGIBMGA009224	0.39	507	2e-87	FBpp0082004	604563 charcot-marie-tooth disease, type 4b2; cmt4b2;
NP_112224.1	BGIBMGA009225	0.4	941	3e-177	FBpp0082004	604563 charcot-marie-tooth disease, type 4b2; cmt4b2;
NP_001605.1	BGIBMGA005576	0.89	374	0	FBpp0311818	604717 deafness, autosomal dominant 20; dfna20;
NP_001605.1	BGIBMGA009732	0.29	318	2e-38	FBpp0073983	604717 deafness, autosomal dominant 20; dfna20;
EAW87462.1	BGIBMGA005946	0.29	153	2e-14	FBpp0297590	604804 microcephaly 3, primary, autosomal recessive; mcph3;
BAG53800.1	BGIBMGA006166	0.44	165	4e-28	FBpp0305150	605039 bohring-opitz syndrome; bops;
NP_004968.2	BGIBMGA009076	0.62	55	3e-13	FBpp0304848	605259 spinocerebellar ataxia 13; sca13;
NP_004968.2	BGIBMGA009078	0.5	64	6e-07	FBpp0304494	605259 spinocerebellar ataxia 13; sca13;
NP_004968.2	BGIBMGA009080	0.68	103	6e-39	FBpp0304494	605259 spinocerebellar ataxia 13; sca13;
NP_004968.2	BGIBMGA009081	0.69	67	1e-20	FBpp0304494	605259 spinocerebellar ataxia 13; sca13;
NP_004968.2	BGIBMGA009087	0.8	45	2e-14	FBpp0304494	605259 spinocerebellar ataxia 13; sca13;
NP_055733.2	BGIBMGA012390	0.61	191	3e-69	FBpp0309305	605282 temtamy preaxial brachydactyly syndrome; tpbs;
BAB64936.1	BGIBMGA012391	0.35	514	5e-89	FBpp0309305	605282 temtamy preaxial brachydactyly syndrome; tpbs;
NP_002730.1	BGIBMGA000983	0.41	171	8e-36	FBpp0294058	605361 spinocerebellar ataxia 14; sca14;
NP_002730.1	BGIBMGA001589	0.43	92	1e-13	FBpp0081097	605361 spinocerebellar ataxia 14; sca14;
BAG35228.1	BGIBMGA009303	0.43	69	1e-09	FBpp0304525	605361 spinocerebellar ataxia 14; sca14;
BAG35228.1	BGIBMGA012877	0.47	90	2e-15	FBpp0304575	605361 spinocerebellar ataxia 14; sca14;
NP_002730.1	BGIBMGA013336	0.39	51	5e-06	FBpp0111493	605361 spinocerebellar ataxia 14; sca14;
BAG35228.1	BGIBMGA013775	0.38	81	8e-07	FBpp0311864	605361 spinocerebellar ataxia 14; sca14;
NP_954987.2	BGIBMGA000563	0.54	402	2e-126	FBpp0311654	605407 segawa syndrome, autosomal recessive;
NP_079171.1	BGIBMGA004936	0.43	94	2e-12	FBpp0305443	605472 usher syndrome, type iic; ush2c; 276901 usher syndrome, type iia; ush2a;
NP_055023.2	BGIBMGA000117	0.19	761	3e-11	FBpp0310550	605594 deafness, autosomal dominant 39, with dentinogenesis imperfecta 1; 125420 dentin dysplasia, type ii; 125490 dentinogenesis imperfecta 1; dgi1; 125500 dentinogenesis imperfecta, shields type iii;
ABX82465.1	BGIBMGA000228	0.23	269	1e-08	FBpp0300167	605594 deafness, autosomal dominant 39, with dentinogenesis imperfecta 1; 125420 dentin dysplasia, type ii; 125490 dentinogenesis imperfecta 1; dgi1; 125500 dentinogenesis imperfecta, shields type iii;
NP_055023.2	BGIBMGA000388	0.21	803	2e-33	FBpp0271739	605594 deafness, autosomal dominant 39, with dentinogenesis imperfecta 1; 125420 dentin dysplasia, type ii; 125490 dentinogenesis imperfecta 1; dgi1; 125500 dentinogenesis imperfecta, shields type iii;
NP_055023.2	BGIBMGA000444	0.17	385	4e-09		605594 deafness, autosomal dominant 39, with dentinogenesis imperfecta 1; 125420 dentin dysplasia, type ii; 125490 dentinogenesis imperfecta 1; dgi1; 125500 dentinogenesis imperfecta, shields type iii;
NP_055023.2	BGIBMGA000537	0.21	232	4e-06	FBpp0288779	605594 deafness, autosomal dominant 39, with dentinogenesis imperfecta 1; 125420 dentin dysplasia, type ii; 125490 dentinogenesis imperfecta 1; dgi1; 125500 dentinogenesis imperfecta, shields type iii;
NP_055023.2	BGIBMGA001675	0.18	255	5e-06	FBpp0083716	605594 deafness, autosomal dominant 39, with dentinogenesis imperfecta 1; 125420 dentin dysplasia, type ii; 125490 dentinogenesis imperfecta 1; dgi1; 125500 dentinogenesis imperfecta, shields type iii;
ABZ91540.1	BGIBMGA001793	0.25	590	2e-12	FBpp0082020	605594 deafness, autosomal dominant 39, with dentinogenesis imperfecta 1; 125420 dentin dysplasia, type ii; 125490 dentinogenesis imperfecta 1; dgi1; 125500 dentinogenesis imperfecta, shields type iii;
EAX05993.1	BGIBMGA001817	0.23	268	4e-09	FBpp0307740	605594 deafness, autosomal dominant 39, with dentinogenesis imperfecta 1; 125420 dentin dysplasia, type ii; 125490 dentinogenesis imperfecta 1; dgi1; 125500 dentinogenesis imperfecta, shields type iii;
NP_055023.2	BGIBMGA001820	0.22	250	6e-08	FBpp0084879	605594 deafness, autosomal dominant 39, with dentinogenesis imperfecta 1; 125420 dentin dysplasia, type ii; 125490 dentinogenesis imperfecta 1; dgi1; 125500 dentinogenesis imperfecta, shields type iii;
AAD16120.1	BGIBMGA002382	0.19	147	7e-06	FBpp0300999	605594 deafness, autosomal dominant 39, with dentinogenesis imperfecta 1; 125420 dentin dysplasia, type ii; 125490 dentinogenesis imperfecta 1; dgi1; 125500 dentinogenesis imperfecta, shields type iii;
AAD16120.1	BGIBMGA002609	0.2	403	2e-11	FBpp0074389	605594 deafness, autosomal dominant 39, with dentinogenesis imperfecta 1; 125420 dentin dysplasia, type ii; 125490 dentinogenesis imperfecta 1; dgi1; 125500 dentinogenesis imperfecta, shields type iii;
AAD16120.1	BGIBMGA003240	0.21	307	2e-07	FBpp0075182	605594 deafness, autosomal dominant 39, with dentinogenesis imperfecta 1; 125420 dentin dysplasia, type ii; 125490 dentinogenesis imperfecta 1; dgi1; 125500 dentinogenesis imperfecta, shields type iii;
ABX82491.1	BGIBMGA003343	0.28	365	1e-41	FBpp0306506	605594 deafness, autosomal dominant 39, with dentinogenesis imperfecta 1; 125420 dentin dysplasia, type ii; 125490 dentinogenesis imperfecta 1; dgi1; 125500 dentinogenesis imperfecta, shields type iii;
NP_055023.2	BGIBMGA003781	0.21	348	1e-12	FBpp0074389	605594 deafness, autosomal dominant 39, with dentinogenesis imperfecta 1; 125420 dentin dysplasia, type ii; 125490 dentinogenesis imperfecta 1; dgi1; 125500 dentinogenesis imperfecta, shields type iii;
EAX05993.1	BGIBMGA004051	0.19	336	1e-07	FBpp0075850	605594 deafness, autosomal dominant 39, with dentinogenesis imperfecta 1; 125420 dentin dysplasia, type ii; 125490 dentinogenesis imperfecta 1; dgi1; 125500 dentinogenesis imperfecta, shields type iii;
AAF42472.1	BGIBMGA004939	0.22	299	2e-07	FBpp0112211	605594 deafness, autosomal dominant 39, with dentinogenesis imperfecta 1; 125420 dentin dysplasia, type ii; 125490 dentinogenesis imperfecta 1; dgi1; 125500 dentinogenesis imperfecta, shields type iii;
ABZ91540.1	BGIBMGA005012	0.3	123	2e-31	FBpp0080687	605594 deafness, autosomal dominant 39, with dentinogenesis imperfecta 1; 125420 dentin dysplasia, type ii; 125490 dentinogenesis imperfecta 1; dgi1; 125500 dentinogenesis imperfecta, shields type iii;
AAD16120.1	BGIBMGA006283	0.19	312	5e-09	FBpp0307636	605594 deafness, autosomal dominant 39, with dentinogenesis imperfecta 1; 125420 dentin dysplasia, type ii; 125490 dentinogenesis imperfecta 1; dgi1; 125500 dentinogenesis imperfecta, shields type iii;
NP_055023.2	BGIBMGA006763	0.17	644	2e-13	FBpp0307636	605594 deafness, autosomal dominant 39, with dentinogenesis imperfecta 1; 125420 dentin dysplasia, type ii; 125490 dentinogenesis imperfecta 1; dgi1; 125500 dentinogenesis imperfecta, shields type iii;
ABZ91542.1	BGIBMGA007503	0.29	110	4e-08	FBpp0084032	605594 deafness, autosomal dominant 39, with dentinogenesis imperfecta 1; 125420 dentin dysplasia, type ii; 125490 dentinogenesis imperfecta 1; dgi1; 125500 dentinogenesis imperfecta, shields type iii;
AAD16120.1	BGIBMGA007719	0.21	278	1e-12	FBpp0311451	605594 deafness, autosomal dominant 39, with dentinogenesis imperfecta 1; 125420 dentin dysplasia, type ii; 125490 dentinogenesis imperfecta 1; dgi1; 125500 dentinogenesis imperfecta, shields type iii;
NP_055023.2	BGIBMGA008313	0.19	541	4e-14	FBpp0307636	605594 deafness, autosomal dominant 39, with dentinogenesis imperfecta 1; 125420 dentin dysplasia, type ii; 125490 dentinogenesis imperfecta 1; dgi1; 125500 dentinogenesis imperfecta, shields type iii;
EAX05993.1	BGIBMGA010235	0.2	297	2e-11	FBpp0305395	605594 deafness, autosomal dominant 39, with dentinogenesis imperfecta 1; 125420 dentin dysplasia, type ii; 125490 dentinogenesis imperfecta 1; dgi1; 125500 dentinogenesis imperfecta, shields type iii;
EAX05993.1	BGIBMGA011611	0.18	398	2e-06	FBpp0308553	605594 deafness, autosomal dominant 39, with dentinogenesis imperfecta 1; 125420 dentin dysplasia, type ii; 125490 dentinogenesis imperfecta 1; dgi1; 125500 dentinogenesis imperfecta, shields type iii;
AAD16120.1	BGIBMGA011896	0.21	316	3e-12	FBpp0312156	605594 deafness, autosomal dominant 39, with dentinogenesis imperfecta 1; 125420 dentin dysplasia, type ii; 125490 dentinogenesis imperfecta 1; dgi1; 125500 dentinogenesis imperfecta, shields type iii;
AAD16120.1	BGIBMGA011901	0.21	656	3e-29	FBpp0077664	605594 deafness, autosomal dominant 39, with dentinogenesis imperfecta 1; 125420 dentin dysplasia, type ii; 125490 dentinogenesis imperfecta 1; dgi1; 125500 dentinogenesis imperfecta, shields type iii;
EAX05993.1	BGIBMGA012042	0.16	369	4e-06	FBpp0074389	605594 deafness, autosomal dominant 39, with dentinogenesis imperfecta 1; 125420 dentin dysplasia, type ii; 125490 dentinogenesis imperfecta 1; dgi1; 125500 dentinogenesis imperfecta, shields type iii;
AAF42472.1	BGIBMGA012765	0.19	541	6e-09	FBpp0074389	605594 deafness, autosomal dominant 39, with dentinogenesis imperfecta 1; 125420 dentin dysplasia, type ii; 125490 dentinogenesis imperfecta 1; dgi1; 125500 dentinogenesis imperfecta, shields type iii;
AAD16120.1	BGIBMGA013380	0.22	324	9e-09	FBpp0074389	605594 deafness, autosomal dominant 39, with dentinogenesis imperfecta 1; 125420 dentin dysplasia, type ii; 125490 dentinogenesis imperfecta 1; dgi1; 125500 dentinogenesis imperfecta, shields type iii;
EAX05993.1	BGIBMGA013759	0.2	413	4e-09	FBpp0076550	605594 deafness, autosomal dominant 39, with dentinogenesis imperfecta 1; 125420 dentin dysplasia, type ii; 125490 dentinogenesis imperfecta 1; dgi1; 125500 dentinogenesis imperfecta, shields type iii;
NP_006293.2	BGIBMGA012142	0.43	439	1e-104	FBpp0288666	606056 congenital disorder of glycosylation, type iib; cdg2b;
NP_009193.2	BGIBMGA011357	0.52	185	2e-38	FBpp0085065	606324 parkinson disease 7, autosomal recessive early-onset; park7;
NP_620448.1	BGIBMGA003560	0.54	78	2e-18	FBpp0080111	606369 html::element=hash(0x2b2fbb0);
BAH11677.1	BGIBMGA003561	0.47	292	8e-64	FBpp0080111	606369 html::element=hash(0x2b2fbb0);
NP_620448.1	BGIBMGA006725	0.37	310	2e-56	FBpp0311493	606369 html::element=hash(0x2b2fbb0);
NP_620448.1	BGIBMGA007357	0.87	31	8e-10	FBpp0290204	606369 html::element=hash(0x2b2fbb0);
NP_620448.1	BGIBMGA007358	0.81	353	3e-168	FBpp0290204	606369 html::element=hash(0x2b2fbb0);
EAW63915.1	BGIBMGA013392	0.55	2588	0	FBpp0310670	606658 spinocerebellar ataxia 15; sca15;
NP_001135445.1	BGIBMGA000366	0.39	1060	0	FBpp0112329	606693 kufor-rakeb syndrome; krs;
NP_071372.1	BGIBMGA005726	0.34	957	2e-142	FBpp0305364	606693 kufor-rakeb syndrome; krs;
NP_071372.1	BGIBMGA006162	0.28	731	5e-68	FBpp0079815	606693 kufor-rakeb syndrome; krs;
AAI21805.1	BGIBMGA000223	0.28	344	3e-31	FBpp0087180	606777 glut1 deficiency syndrome 1; glut1ds1; 612126 glut1 deficiency syndrome 2; glut1ds2;
AAA52571.1	BGIBMGA001147	0.26	409	9e-24	FBpp0300975	606777 glut1 deficiency syndrome 1; glut1ds1; 612126 glut1 deficiency syndrome 2; glut1ds2;
NP_006507.2	BGIBMGA001664	0.48	447	3e-92	FBpp0311739	606777 glut1 deficiency syndrome 1; glut1ds1; 612126 glut1 deficiency syndrome 2; glut1ds2;
AAA52571.1	BGIBMGA002852	0.24	417	8e-21	FBpp0072148	606777 glut1 deficiency syndrome 1; glut1ds1; 612126 glut1 deficiency syndrome 2; glut1ds2;
NP_006507.2	BGIBMGA004506	0.23	415	9e-17	FBpp0072148	606777 glut1 deficiency syndrome 1; glut1ds1; 612126 glut1 deficiency syndrome 2; glut1ds2;
AAA52571.1	BGIBMGA004507	0.22	404	2e-13	FBpp0300975	606777 glut1 deficiency syndrome 1; glut1ds1; 612126 glut1 deficiency syndrome 2; glut1ds2;
AAA52571.1	BGIBMGA004510	0.23	335	3e-10	FBpp0072148	606777 glut1 deficiency syndrome 1; glut1ds1; 612126 glut1 deficiency syndrome 2; glut1ds2;
NP_006507.2	BGIBMGA004511	0.22	418	5e-15	FBpp0087179	606777 glut1 deficiency syndrome 1; glut1ds1; 612126 glut1 deficiency syndrome 2; glut1ds2;
AAA52571.1	BGIBMGA004527	0.23	405	1e-12	FBpp0087180	606777 glut1 deficiency syndrome 1; glut1ds1; 612126 glut1 deficiency syndrome 2; glut1ds2;
AAA52571.1	BGIBMGA004538	0.23	399	1e-09	FBpp0072148	606777 glut1 deficiency syndrome 1; glut1ds1; 612126 glut1 deficiency syndrome 2; glut1ds2;
NP_006507.2	BGIBMGA004559	0.23	399	5e-14	FBpp0072148	606777 glut1 deficiency syndrome 1; glut1ds1; 612126 glut1 deficiency syndrome 2; glut1ds2;
NP_006507.2	BGIBMGA004560	0.25	236	9e-09	FBpp0072148	606777 glut1 deficiency syndrome 1; glut1ds1; 612126 glut1 deficiency syndrome 2; glut1ds2;
AAA52571.1	BGIBMGA004561	0.21	436	2e-11	FBpp0087180	606777 glut1 deficiency syndrome 1; glut1ds1; 612126 glut1 deficiency syndrome 2; glut1ds2;
NP_006507.2	BGIBMGA004566	0.25	325	2e-10	FBpp0075675	606777 glut1 deficiency syndrome 1; glut1ds1; 612126 glut1 deficiency syndrome 2; glut1ds2;
NP_006507.2	BGIBMGA004567	0.25	415	5e-20	FBpp0300975	606777 glut1 deficiency syndrome 1; glut1ds1; 612126 glut1 deficiency syndrome 2; glut1ds2;
NP_006507.2	BGIBMGA005424	0.26	400	1e-17	FBpp0072148	606777 glut1 deficiency syndrome 1; glut1ds1; 612126 glut1 deficiency syndrome 2; glut1ds2;
AAI21805.1	BGIBMGA006273	0.45	393	3e-92	FBpp0311739	606777 glut1 deficiency syndrome 1; glut1ds1; 612126 glut1 deficiency syndrome 2; glut1ds2;
BAD92224.1	BGIBMGA007461	0.48	485	2e-101	FBpp0305693	606777 glut1 deficiency syndrome 1; glut1ds1; 612126 glut1 deficiency syndrome 2; glut1ds2;
AAA52571.1	BGIBMGA008232	0.2	427	5e-06	FBpp0072148	606777 glut1 deficiency syndrome 1; glut1ds1; 612126 glut1 deficiency syndrome 2; glut1ds2;
BAF85480.1	BGIBMGA013651	0.23	461	1e-22	FBpp0077272	606777 glut1 deficiency syndrome 1; glut1ds1; 612126 glut1 deficiency syndrome 2; glut1ds2;
AAI21805.1	BGIBMGA014055	0.2	357	7e-13	FBpp0297096	606777 glut1 deficiency syndrome 1; glut1ds1; 612126 glut1 deficiency syndrome 2; glut1ds2;
NP_000134.2	BGIBMGA008214	0.63	420	3e-136	FBpp0070916	606812 fumarase deficiency; 150800 hereditary leiomyomatosis and renal cell cancer; hlrcc;
NP_000134.2	BGIBMGA008216	0.77	44	2e-14	FBpp0070915	606812 fumarase deficiency; 150800 hereditary leiomyomatosis and renal cell cancer; hlrcc;
BAG52166.1	BGIBMGA002824	0.27	354	2e-28	FBpp0085101	606854 polymicrogyria, bilateral frontoparietal;
BAG59718.1	BGIBMGA005714	0.36	203	4e-25	FBpp0290577	606854 polymicrogyria, bilateral frontoparietal;
NP_775748.2	BGIBMGA005584	0.55	91	2e-25	FBpp0086904	606943 usher syndrome, type ig; ush1g;
NP_940980.3	BGIBMGA012186	0.28	516	1e-48	FBpp0306703	607060 parkinson disease 8, autosomal dominant; park8;
NP_003185.1	BGIBMGA003121	0.35	241	2e-33	FBpp0305945	607136 spinocerebellar ataxia 17; sca17; 168600 parkinson disease, late-onset; pd;
NP_003185.1	BGIBMGA010619	0.87	198	7e-93	FBpp0071596	607136 spinocerebellar ataxia 17; sca17; 168600 parkinson disease, late-onset; pd;
NP_003185.1	BGIBMGA010667	0.47	171	1e-38	FBpp0071596	607136 spinocerebellar ataxia 17; sca17; 168600 parkinson disease, late-onset; pd;
NP_861970.1	BGIBMGA014502	0.58	511	1e-146	FBpp0311877	607174 meningioma, familial, susceptibility to; 101000 neurofibromatosis, type ii; nf2; 162091 schwannomatosis;
NP_068380.3	BGIBMGA001712	0.26	270	3e-23	FBpp0310687	607196 microcephaly, amish type; mcpha; 613710 thiamine metabolism dysfunction syndrome 4 (bilateral striatal degeneration and progressive polyneuropathy type); thmd4;
BAC11492.1	BGIBMGA002002	0.28	286	7e-29	FBpp0304400	607196 microcephaly, amish type; mcpha; 613710 thiamine metabolism dysfunction syndrome 4 (bilateral striatal degeneration and progressive polyneuropathy type); thmd4;
BAC11492.1	BGIBMGA002088	0.29	307	2e-33	FBpp0081810	607196 microcephaly, amish type; mcpha; 613710 thiamine metabolism dysfunction syndrome 4 (bilateral striatal degeneration and progressive polyneuropathy type); thmd4;
BAC11492.1	BGIBMGA002709	0.24	297	1e-15	FBpp0087692	607196 microcephaly, amish type; mcpha; 613710 thiamine metabolism dysfunction syndrome 4 (bilateral striatal degeneration and progressive polyneuropathy type); thmd4;
NP_068380.3	BGIBMGA003387	0.26	195	3e-07	FBpp0084926	607196 microcephaly, amish type; mcpha; 613710 thiamine metabolism dysfunction syndrome 4 (bilateral striatal degeneration and progressive polyneuropathy type); thmd4;
BAC11492.1	BGIBMGA007476	0.29	298	1e-27	FBpp0310685	607196 microcephaly, amish type; mcpha; 613710 thiamine metabolism dysfunction syndrome 4 (bilateral striatal degeneration and progressive polyneuropathy type); thmd4;
NP_068380.3	BGIBMGA012051	0.42	270	8e-53	FBpp0081810	607196 microcephaly, amish type; mcpha; 613710 thiamine metabolism dysfunction syndrome 4 (bilateral striatal degeneration and progressive polyneuropathy type); thmd4;
NP_705902.2	BGIBMGA012219	0.48	355	3e-88	FBpp0298381	607236 hypoprebetalipoproteinemia, acanthocytosis, retinitis pigmentosa, and pallidal degeneration; 234200 neurodegeneration with brain iron accumulation 1; nbia1;
AAH36104.1	BGIBMGA012223	0.62	498	5e-168	FBpp0311759	607259 spastic paraplegia 7, autosomal recessive; spg7;
NP_003110.1	BGIBMGA012224	0.4	112	3e-12	FBpp0311759	607259 spastic paraplegia 7, autosomal recessive; spg7;
NP_071765.2	BGIBMGA003749	0.31	97	2e-08	FBpp0305929	607313 gaze palsy, familial horizontal, with progressive scoliosis; hgpps;
NP_008849.2	BGIBMGA008082	0.29	163	7e-06	FBpp0073642	607330 lathosterolosis;
NP_001092.1	BGIBMGA001921	0.36	369	3e-67	FBpp0306212	607371 dystonia, juvenile-onset;
AAH16045.1	BGIBMGA002082	0.43	375	6e-87	FBpp0082597	607371 dystonia, juvenile-onset;
CAA45026.1	BGIBMGA002083	0.36	367	3e-63	FBpp0071448	607371 dystonia, juvenile-onset;
AAH16045.1	BGIBMGA009805	0.31	372	1e-36	FBpp0086115	607371 dystonia, juvenile-onset;
NP_001092.1	BGIBMGA009821	0.89	374	0	FBpp0082597	607371 dystonia, juvenile-onset;
NP_001092.1	BGIBMGA013945	0.97	374	0	FBpp0071448	607371 dystonia, juvenile-onset;
BAG38145.1	BGIBMGA000752	0.34	345	1e-46	FBpp0311357	607426 coenzyme q10 deficiency, primary, 1; coq10d1;
AAH39906.1	BGIBMGA000823	0.34	356	1e-50	FBpp0311357	607426 coenzyme q10 deficiency, primary, 1; coq10d1;
NP_055132.2	BGIBMGA002401	0.21	242	2e-07	FBpp0291255	607426 coenzyme q10 deficiency, primary, 1; coq10d1;
BAG38145.1	BGIBMGA009744	0.33	346	7e-43	FBpp0311357	607426 coenzyme q10 deficiency, primary, 1; coq10d1;
NP_056512.5	BGIBMGA011995	0.55	264	1e-63	FBpp0081347	607426 coenzyme q10 deficiency, primary, 1; coq10d1;
NP_055132.2	BGIBMGA012564	0.53	88	1e-21	FBpp0311406	607426 coenzyme q10 deficiency, primary, 1; coq10d1;
NP_055132.2	BGIBMGA012565	0.58	183	3e-53	FBpp0311406	607426 coenzyme q10 deficiency, primary, 1; coq10d1;
NP_065114.3	BGIBMGA012681	0.51	181	2e-43	FBpp0311357	607426 coenzyme q10 deficiency, primary, 1; coq10d1;
NP_065114.3	BGIBMGA012682	0.32	149	6e-13	FBpp0311357	607426 coenzyme q10 deficiency, primary, 1; coq10d1;
NP_064632.2	BGIBMGA002149	0.56	365	1e-114	FBpp0073530	607426 coenzyme q10 deficiency, primary, 1; coq10d1; 612016 coenzyme q10 deficiency, primary, 4; coq10d4;
BAC11143.1	BGIBMGA011544	0.24	288	1e-18	FBpp0310095	607426 coenzyme q10 deficiency, primary, 1; coq10d1; 612016 coenzyme q10 deficiency, primary, 4; coq10d4;
NP_000421.1	BGIBMGA000456	0.24	276	3e-15	FBpp0085900	607432 lissencephaly 1; lis1;
NP_000421.1	BGIBMGA001038	0.26	319	9e-36	FBpp0075597	607432 lissencephaly 1; lis1;
NP_000421.1	BGIBMGA001509	0.28	161	6e-11	FBpp0070382	607432 lissencephaly 1; lis1;
NP_000421.1	BGIBMGA001786	0.32	114	1e-12	FBpp0080383	607432 lissencephaly 1; lis1;
NP_000421.1	BGIBMGA002361	0.24	306	6e-21	FBpp0081650	607432 lissencephaly 1; lis1;
NP_000421.1	BGIBMGA002837	0.22	287	1e-17	FBpp0085902	607432 lissencephaly 1; lis1;
NP_000421.1	BGIBMGA003177	0.2	263	2e-10	FBpp0075377	607432 lissencephaly 1; lis1;
AAA02882.1	BGIBMGA003545	0.34	110	5e-11	FBpp0300790	607432 lissencephaly 1; lis1;
NP_000421.1	BGIBMGA003892	0.26	267	5e-26	FBpp0080048	607432 lissencephaly 1; lis1;
NP_000421.1	BGIBMGA004202	0.25	141	1e-06	FBpp0087938	607432 lissencephaly 1; lis1;
NP_000421.1	BGIBMGA004847	0.26	260	5e-14	FBpp0311988	607432 lissencephaly 1; lis1;
NP_000421.1	BGIBMGA004947	0.26	157	1e-11	FBpp0083070	607432 lissencephaly 1; lis1;
NP_000421.1	BGIBMGA005312	0.25	264	5e-23	FBpp0077735	607432 lissencephaly 1; lis1;
NP_000421.1	BGIBMGA005452	0.21	318	2e-12	FBpp0079780	607432 lissencephaly 1; lis1;
NP_000421.1	BGIBMGA005503	0.67	399	7e-158	FBpp0293289	607432 lissencephaly 1; lis1;
NP_000421.1	BGIBMGA005597	0.25	188	9e-12	FBpp0082995	607432 lissencephaly 1; lis1;
NP_000421.1	BGIBMGA005636	0.31	99	1e-10	FBpp0090943	607432 lissencephaly 1; lis1;
NP_000421.1	BGIBMGA005866	0.25	219	3e-09	FBpp0291686	607432 lissencephaly 1; lis1;
NP_000421.1	BGIBMGA005916	0.26	285	2e-25	FBpp0309385	607432 lissencephaly 1; lis1;
NP_000421.1	BGIBMGA006325	0.28	98	1e-06	FBpp0309536	607432 lissencephaly 1; lis1;
NP_000421.1	BGIBMGA006496	0.28	206	3e-20	FBpp0083779	607432 lissencephaly 1; lis1;
NP_000421.1	BGIBMGA006701	0.26	277	2e-14	FBpp0071028	607432 lissencephaly 1; lis1;
NP_000421.1	BGIBMGA006805	0.32	225	3e-26	FBpp0086590	607432 lissencephaly 1; lis1;
NP_000421.1	BGIBMGA007145	0.2	313	1e-08	FBpp0293289	607432 lissencephaly 1; lis1;
NP_000421.1	BGIBMGA007399	0.27	314	8e-27	FBpp0309501	607432 lissencephaly 1; lis1;
NP_000421.1	BGIBMGA007477	0.28	305	1e-28	FBpp0303680	607432 lissencephaly 1; lis1;
NP_000421.1	BGIBMGA007583	0.26	262	2e-24	FBpp0077715	607432 lissencephaly 1; lis1;
NP_000421.1	BGIBMGA007889	0.21	221	3e-08	FBpp0078689	607432 lissencephaly 1; lis1;
NP_000421.1	BGIBMGA007895	0.3	289	3e-41	FBpp0300790	607432 lissencephaly 1; lis1;
NP_000421.1	BGIBMGA008073	0.3	144	7e-12	FBpp0083581	607432 lissencephaly 1; lis1;
AAL34973.1	BGIBMGA009595	0.24	262	3e-17	FBpp0085224	607432 lissencephaly 1; lis1;
NP_000421.1	BGIBMGA009620	0.22	255	4e-08	FBpp0300790	607432 lissencephaly 1; lis1;
NP_000421.1	BGIBMGA010388	0.36	55	3e-07	FBpp0075302	607432 lissencephaly 1; lis1;
NP_000421.1	BGIBMGA010562	0.31	114	2e-11	FBpp0297142	607432 lissencephaly 1; lis1;
NP_000421.1	BGIBMGA010725	0.29	281	3e-25	FBpp0072694	607432 lissencephaly 1; lis1;
NP_000421.1	BGIBMGA010974	0.26	305	3e-25	FBpp0073459	607432 lissencephaly 1; lis1;
NP_000421.1	BGIBMGA011028	0.25	279	4e-15	FBpp0080391	607432 lissencephaly 1; lis1;
AAA02882.1	BGIBMGA012191	0.26	195	1e-13	FBpp0074971	607432 lissencephaly 1; lis1;
NP_000421.1	BGIBMGA012206	0.29	286	2e-27	FBpp0303082	607432 lissencephaly 1; lis1;
NP_000421.1	BGIBMGA012354	0.4	83	2e-11	FBpp0073103	607432 lissencephaly 1; lis1;
NP_000421.1	BGIBMGA012355	0.3	212	4e-23	FBpp0073103	607432 lissencephaly 1; lis1;
NP_000421.1	BGIBMGA012489	0.32	113	1e-09	FBpp0307640	607432 lissencephaly 1; lis1;
NP_000421.1	BGIBMGA013454	0.24	313	1e-17	FBpp0293233	607432 lissencephaly 1; lis1;
NP_000421.1	BGIBMGA013533	0.26	340	5e-26	FBpp0303327	607432 lissencephaly 1; lis1;
NP_000421.1	BGIBMGA013837	0.27	262	6e-22	FBpp0304695	607432 lissencephaly 1; lis1;
NP_000421.1	BGIBMGA014036	0.28	221	4e-21	FBpp0087335	607432 lissencephaly 1; lis1;
BAD96194.1	BGIBMGA008221	0.27	119	3e-07	FBpp0297402	607625 niemann-pick disease, type c2;
NP_006423.1	BGIBMGA008405	0.33	141	7e-19	FBpp0077492	607625 niemann-pick disease, type c2;
AAA52372.1	BGIBMGA011498	0.64	148	9e-56	FBpp0310950	607678 charcot-marie-tooth disease, demyelinating, type 1d; cmt1d; 145900 hypertrophic neuropathy of dejerine-sottas; 605253 neuropathy, congenital hypomyelinating or amyelinating, autosomal recessive; chn;
NP_031399.2	BGIBMGA000130	0.31	214	2e-16	FBpp0311597	607721 noonan syndrome-like disorder with loose anagen hair; nslh;
NP_031399.2	BGIBMGA001436	0.29	125	2e-10	FBpp0304061	607721 noonan syndrome-like disorder with loose anagen hair; nslh;
BAA74885.2	BGIBMGA005373	0.3	436	5e-45	FBpp0077892	607721 noonan syndrome-like disorder with loose anagen hair; nslh;
NP_031399.2	BGIBMGA005655	0.27	298	9e-17	FBpp0308615	607721 noonan syndrome-like disorder with loose anagen hair; nslh;
NP_031399.2	BGIBMGA006403	0.66	496	0	FBpp0308615	607721 noonan syndrome-like disorder with loose anagen hair; nslh;
BAF85522.1	BGIBMGA006516	0.39	189	3e-29	FBpp0300857	607721 noonan syndrome-like disorder with loose anagen hair; nslh;
NP_031399.2	BGIBMGA007683	0.29	143	3e-09	FBpp0304137	607721 noonan syndrome-like disorder with loose anagen hair; nslh;
BAA74885.2	BGIBMGA007706	0.32	184	5e-21	FBpp0070997	607721 noonan syndrome-like disorder with loose anagen hair; nslh;
NP_031399.2	BGIBMGA007715	0.32	168	7e-11	FBpp0309578	607721 noonan syndrome-like disorder with loose anagen hair; nslh;
NP_031399.2	BGIBMGA008504	0.32	234	6e-21	FBpp0307841	607721 noonan syndrome-like disorder with loose anagen hair; nslh;
NP_031399.2	BGIBMGA010322	0.29	456	2e-39	FBpp0082312	607721 noonan syndrome-like disorder with loose anagen hair; nslh;
NP_031399.2	BGIBMGA013072	0.31	168	2e-18	FBpp0084021	607721 noonan syndrome-like disorder with loose anagen hair; nslh;
BAG52235.1	BGIBMGA014544	0.41	61	3e-08	FBpp0308842	607721 noonan syndrome-like disorder with loose anagen hair; nslh;
NP_002172.2	BGIBMGA012535	0.48	278	2e-66	FBpp0099945	607778 acrocapitofemoral dysplasia; acfd; 112500 brachydactyly, type a1; bda1;
CAA65774.1	BGIBMGA004852	0.74	714	0	FBpp0308424	607812 craniolenticulosutural dysplasia; clsd;
NP_060889.1	BGIBMGA010263	0.32	144	6e-11	FBpp0306421	607823 hypotrichosis-lymphedema-telangiectasia syndrome; hlts;
NP_060889.1	BGIBMGA011184	0.33	72	1e-06	FBpp0303740	607823 hypotrichosis-lymphedema-telangiectasia syndrome; hlts;
NP_001165282.1	BGIBMGA013129	0.44	403	2e-98	FBpp0306807	608013 gaucher disease, perinatal lethal; 230800 gaucher disease, type i; 230900 gaucher disease, type ii; 231000 gaucher disease, type iii; 231005 gaucher disease, type iiic;
NP_001165282.1	BGIBMGA013130	0.42	400	1e-83	FBpp0306807	608013 gaucher disease, perinatal lethal; 230800 gaucher disease, type i; 230900 gaucher disease, type ii; 231000 gaucher disease, type iii; 231005 gaucher disease, type iiic;
NP_597725.1	BGIBMGA002847	0.32	128	3e-08	FBpp0288685	608022 diaphanospondylodysostosis;
NP_597725.1	BGIBMGA005348	0.26	163	2e-10	FBpp0304148	608022 diaphanospondylodysostosis;
NP_597725.1	BGIBMGA006913	0.34	524	9e-86	FBpp0071536	608022 diaphanospondylodysostosis;
AAH47771.1	BGIBMGA010664	0.61	300	2e-94	FBpp0080017	608093 congenital disorder of glycosylation, type ij; cdg1j;
NP_003655.3	BGIBMGA007196	0.56	412	2e-104	FBpp0304569	608233 hermansky-pudlak syndrome 2; hps2;
AAT49048.1	BGIBMGA012922	0.3	454	1e-47	FBpp0074558	608233 hermansky-pudlak syndrome 2; hps2;
NP_003655.3	BGIBMGA013717	0.29	157	5e-07	FBpp0074348	608233 hermansky-pudlak syndrome 2; hps2;
NP_060921.3	BGIBMGA014521	0.49	171	2e-42	FBpp0081088	608393 microcephaly 6, primary, autosomal recessive; mcph6; 613676 seckel syndrome 4; sckl4;
AAN04488.1	BGIBMGA006026	0.35	320	9e-50	FBpp0079786	608443 mental retardation, autosomal recessive 3; mrt3;
AAH31095.1	BGIBMGA011976	0.45	425	2e-102	FBpp0082947	608540 congenital disorder of glycosylation, type ik; cdg1k;
AAB64299.1	BGIBMGA007838	0.44	186	1e-32	FBpp0305378	608594 lipodystrophy, congenital generalized, type 1; cgl1;
AAB64299.1	BGIBMGA007839	0.45	149	2e-30	FBpp0305378	608594 lipodystrophy, congenital generalized, type 1; cgl1;
AAB64299.1	BGIBMGA007880	0.4	156	3e-28	FBpp0305378	608594 lipodystrophy, congenital generalized, type 1; cgl1;
NP_653164.2	BGIBMGA000936	0.59	225	3e-76	FBpp0291066	608611 ribose 5-phosphate isomerase deficiency;
NP_005848.2	BGIBMGA011087	0.43	456	2e-101	FBpp0086207	608612 mandibuloacral dysplasia with type b lipodystrophy; madb; 275210 restrictive dermopathy, lethal;
BAA90929.1	BGIBMGA002214	0.28	219	7e-17	FBpp0290295	608629 joubert syndrome 3; jbts3;
BAF85542.1	BGIBMGA003479	0.4	311	2e-58	FBpp0297580	608641 deafness, autosomal dominant 28; dfna28;
BAB14699.1	BGIBMGA009653	0.35	188	3e-26	FBpp0312214	608641 deafness, autosomal dominant 28; dfna28;
P20711.2	BGIBMGA002958	0.52	469	1e-138	FBpp0080698	608643 aromatic l-amino acid decarboxylase deficiency;
CAG33005.1	BGIBMGA003199	0.59	480	1e-172	FBpp0288730	608643 aromatic l-amino acid decarboxylase deficiency;
CAG33005.1	BGIBMGA006804	0.52	480	3e-147	FBpp0085475	608643 aromatic l-amino acid decarboxylase deficiency;
NP_001076440.1	BGIBMGA009691	0.56	441	1e-142	FBpp0311591	608643 aromatic l-amino acid decarboxylase deficiency;
AAA97405.1	BGIBMGA002462	0.68	591	0	FBpp0292528	608688 aicar transformylase/imp cyclohydrolase deficiency;
NP_060606.3	BGIBMGA005594	0.29	503	4e-58	FBpp0084071	608716 microcephaly 5, primary, autosomal recessive; mcph5;
NP_060914.2	BGIBMGA000518	0.44	443	1e-93	FBpp0298274	608782 pyruvate dehydrogenase phosphatase deficiency; pdhpd;
NP_003850.1	BGIBMGA001115	0.27	202	6e-13	FBpp0079234	608799 congenital disorder of glycosylation, type ie; cdg1e;
NP_003850.1	BGIBMGA004218	0.77	238	6e-108	FBpp0080817	608799 congenital disorder of glycosylation, type ie; cdg1e;
NP_000089.1	BGIBMGA010559	0.5	611	2e-168	FBpp0072848	608836 carnitine palmitoyltransferase ii deficiency, lethal neonatal; 600649 carnitine palmitoyltransferase ii deficiency, infantile; 255110 carnitine palmitoyltransferase ii deficiency, late-onset;
EAW59067.1	BGIBMGA000354	0.62	315	9e-111	FBpp0086841	608931 myasthenic syndrome, congenital, associated with acetylcholine receptor deficiency;
NP_000174.1	BGIBMGA014181	0.67	442	3e-166	FBpp0072135	609015 trifunctional protein deficiency;
NP_054772.1	BGIBMGA013527	0.54	63	1e-15	FBpp0292379	609033 posterior column ataxia with retinitis pigmentosa; axpc1;
NP_002283.3	BGIBMGA011931	0.46	97	2e-20	FBpp0293415	609049 pierson syndrome;
BAG37516.1	BGIBMGA000765	0.3	686	6e-75	FBpp0083663	609060 combined oxidative phosphorylation deficiency 1; coxpd1;
AAK58877.1	BGIBMGA001522	0.23	218	6e-10	FBpp0075148	609060 combined oxidative phosphorylation deficiency 1; coxpd1;
NP_079272.4	BGIBMGA004165	0.25	422	3e-23	FBpp0305182	609060 combined oxidative phosphorylation deficiency 1; coxpd1;
NP_079272.4	BGIBMGA004774	0.3	138	8e-08	FBpp0084662	609060 combined oxidative phosphorylation deficiency 1; coxpd1;
AAK58877.1	BGIBMGA006144	0.67	568	0	FBpp0079041	609060 combined oxidative phosphorylation deficiency 1; coxpd1;
NP_079272.4	BGIBMGA007954	0.33	134	3e-13	FBpp0084626	609060 combined oxidative phosphorylation deficiency 1; coxpd1;
CAF02096.2	BGIBMGA000601	0.57	421	4e-135	FBpp0289826	609192 loeys-dietz syndrome, type 1a; lds1a; 608967 loeys-dietz syndrome, type 2a; lds2a; 132800 multiple self-healing squamous epithelioma, susceptibility to; msse;
NP_000253.1	BGIBMGA009518	0.54	109	1e-30	FBpp0079549	609242 kanzaki disease; 609241 schindler disease, type i;
AAD02058.2	BGIBMGA002820	0.5	728	0	FBpp0089221	609260 charcot-marie-tooth disease, axonal, type 2a2; cmt2a2; 601152 hereditary motor and sensory neuropathy vi;
BAC03946.1	BGIBMGA001582	0.52	77	3e-15	FBpp0296935	609284 nemaline myopathy 1; nem1;
BAG37888.1	BGIBMGA001584	0.47	125	1e-18	FBpp0296936	609284 nemaline myopathy 1; nem1;
NP_689476.2	BGIBMGA001585	0.46	157	3e-31	FBpp0296934	609284 nemaline myopathy 1; nem1;
NP_689476.2	BGIBMGA014532	0.23	213	5e-09	FBpp0084479	609284 nemaline myopathy 1; nem1;
NP_078974.1	BGIBMGA010248	0.58	314	2e-89	FBpp0306270	609304 epileptic encephalopathy, early infantile, 3; eiee3;
NP_078974.1	BGIBMGA013168	0.28	294	4e-26	FBpp0099892	609304 epileptic encephalopathy, early infantile, 3; eiee3;
NP_056449.1	BGIBMGA002038	0.24	333	2e-20	FBpp0078634	609460 goldberg-shprintzen megacolon syndrome; goshs;
NP_056449.1	BGIBMGA010526	0.32	593	8e-79	FBpp0078634	609460 goldberg-shprintzen megacolon syndrome; goshs;
NP_004773.1	BGIBMGA012985	0.31	225	2e-26	FBpp0072145	609528 cerebral dysgenesis, neuropathy, ichthyosis, and palmoplantar keratoderma syndrome;
NP_149045.3	BGIBMGA002949	0.25	196	4e-06	FBpp0099721	609533 deafness, autosomal recessive 23; dfnb23; 601067 usher syndrome, type id; ush1d; 602083 usher syndrome, type if; ush1f;
EAW54152.1	BGIBMGA006250	0.31	1226	6e-127	FBpp0292214	609533 deafness, autosomal recessive 23; dfnb23; 601067 usher syndrome, type id; ush1d; 602083 usher syndrome, type if; ush1f;
NP_004605.4	BGIBMGA002721	0.53	173	4e-50	FBpp0302815	609560 mitochondrial dna depletion syndrome 2 (myopathic type); mtdps2;
NP_004605.4	BGIBMGA003909	0.41	202	7e-41	FBpp0302815	609560 mitochondrial dna depletion syndrome 2 (myopathic type); mtdps2;
NP_009060.2	BGIBMGA007595	0.72	118	3e-49	FBpp0078477	609637 holoprosencephaly 5; hpe5;
NP_001185824.1	BGIBMGA000470	0.42	394	1e-84	FBpp0081799	609924 aminoacylase 1 deficiency;
NP_001185824.1	BGIBMGA010352	0.5	394	3e-115	FBpp0310703	609924 aminoacylase 1 deficiency;
NP_001185827.1	BGIBMGA010369	0.37	109	3e-14	FBpp0083745	609924 aminoacylase 1 deficiency;
NP_001185824.1	BGIBMGA011000	0.46	390	1e-102	FBpp0081799	609924 aminoacylase 1 deficiency;
NP_001185824.1	BGIBMGA011001	0.43	396	2e-89	FBpp0081799	609924 aminoacylase 1 deficiency;
NP_001185824.1	BGIBMGA011002	0.47	390	2e-102	FBpp0081799	609924 aminoacylase 1 deficiency;
CAD38535.2	BGIBMGA011308	0.63	350	2e-124	FBpp0074843	610006 2-methylbutyryl-coa dehydrogenase deficiency;
NP_002056.2	BGIBMGA000386	0.39	108	3e-18	FBpp0310164	610015 glutamine deficiency, congenital;
NP_002056.2	BGIBMGA000680	0.56	363	9e-124	FBpp0310164	610015 glutamine deficiency, congenital;
NP_002056.2	BGIBMGA004280	0.56	315	6e-101	FBpp0310164	610015 glutamine deficiency, congenital;
NP_002056.2	BGIBMGA006702	0.46	304	5e-80	FBpp0289795	610015 glutamine deficiency, congenital;
CAA68457.1	BGIBMGA006703	0.49	321	3e-78	FBpp0289795	610015 glutamine deficiency, congenital;
NP_821080.1	BGIBMGA001683	0.85	411	0	FBpp0085720	610031 polymicrogyria, symmetric or asymmetric; pmgysa;
NP_821080.1	BGIBMGA001707	0.81	425	0	FBpp0085720	610031 polymicrogyria, symmetric or asymmetric; pmgysa;
NP_821080.1	BGIBMGA003296	0.83	429	0	FBpp0085720	610031 polymicrogyria, symmetric or asymmetric; pmgysa;
NP_821080.1	BGIBMGA003442	0.96	418	0	FBpp0085720	610031 polymicrogyria, symmetric or asymmetric; pmgysa;
NP_821080.1	BGIBMGA004542	0.97	279	1e-159	FBpp0081524	610031 polymicrogyria, symmetric or asymmetric; pmgysa;
NP_821080.1	BGIBMGA004603	0.97	430	0	FBpp0085720	610031 polymicrogyria, symmetric or asymmetric; pmgysa;
NP_821080.1	BGIBMGA009131	0.87	425	0	FBpp0085720	610031 polymicrogyria, symmetric or asymmetric; pmgysa;
NP_821080.1	BGIBMGA009132	0.97	425	0	FBpp0085720	610031 polymicrogyria, symmetric or asymmetric; pmgysa;
NP_821080.1	BGIBMGA009133	0.91	364	0	FBpp0310087	610031 polymicrogyria, symmetric or asymmetric; pmgysa;
NP_821080.1	BGIBMGA013500	0.34	421	9e-78	FBpp0077326	610031 polymicrogyria, symmetric or asymmetric; pmgysa;
NP_598010.1	BGIBMGA000544	0.3	215	1e-15	FBpp0304454	610048 corneal dystrophy, congenital stromal; cscd;
NP_060599.1	BGIBMGA005391	0.5	234	2e-63	FBpp0081244	610090 pyridoxamine 5-prime-phosphate oxidase deficiency;
NP_060599.1	BGIBMGA012934	0.48	171	1e-42	FBpp0078831	610090 pyridoxamine 5-prime-phosphate oxidase deficiency;
ABM84473.1	BGIBMGA011344	0.55	336	1e-99	FBpp0087972	610127 ceroid lipofuscinosis, neuronal, 10; cln10;
NP_001033692.2	BGIBMGA001447	0.33	106	2e-11	FBpp0310656	610153 deafness, autosomal recessive 49; dfnb49;
NP_660304.1	BGIBMGA003391	0.66	110	2e-36	FBpp0288463	610198 3-methylglutaconic aciduria, type v; mgca5;
CAB48398.1	BGIBMGA003216	0.46	59	2e-07	FBpp0293463	610246 spinocerebellar ataxia 28; sca28;
NP_006787.2	BGIBMGA007332	0.42	264	1e-50	FBpp0088021	610246 spinocerebellar ataxia 28; sca28;
NP_006787.2	BGIBMGA010088	0.66	730	0	FBpp0075012	610246 spinocerebellar ataxia 28; sca28;
NP_006787.2	BGIBMGA014177	0.45	250	7e-47	FBpp0076890	610246 spinocerebellar ataxia 28; sca28;
NP_079033.4	BGIBMGA001083	0.39	169	8e-21	FBpp0305754	610253 kleefstra syndrome;
NP_079033.4	BGIBMGA007557	0.33	178	8e-18	FBpp0112128	610253 kleefstra syndrome;
NP_079033.4	BGIBMGA009571	0.33	181	1e-17	FBpp0311438	610253 kleefstra syndrome;
NP_079033.4	BGIBMGA011407	0.36	167	4e-25	FBpp0111689	610253 kleefstra syndrome;
NP_079033.4	BGIBMGA011500	0.42	162	5e-32	FBpp0307983	610253 kleefstra syndrome;
NP_071762.2	BGIBMGA000941	0.36	246	9e-31	FBpp0311494	610283 cone-rod dystrophy 10; cord10; 610282 retinitis pigmentosa 35; rp35;
NP_006388.2	BGIBMGA011480	0.44	249	8e-52	FBpp0077750	610333 aicardi-goutieres syndrome 4; ags4;
NP_598004.1	BGIBMGA011807	0.39	407	2e-71	FBpp0293735	610356 retinal cone dystrophy 3b; rcd3b;
AAI14432.1	BGIBMGA000060	0.41	605	3e-141	FBpp0303081	610475 pigmented nodular adrenocortical disease, primary, 2; ppnad2;
NP_058649.3	BGIBMGA002043	0.36	559	1e-96	FBpp0292262	610475 pigmented nodular adrenocortical disease, primary, 2; ppnad2;
NP_058649.3	BGIBMGA008850	0.49	53	4e-07	FBpp0292262	610475 pigmented nodular adrenocortical disease, primary, 2; ppnad2;
ADV69111.1	BGIBMGA008851	0.51	353	1e-104	FBpp0310381	610475 pigmented nodular adrenocortical disease, primary, 2; ppnad2;
ADV69111.1	BGIBMGA010521	0.29	487	1e-54	FBpp0292262	610475 pigmented nodular adrenocortical disease, primary, 2; ppnad2;
NP_058649.3	BGIBMGA011291	0.3	319	3e-36	FBpp0311378	610475 pigmented nodular adrenocortical disease, primary, 2; ppnad2;
NP_057149.1	BGIBMGA013765	0.48	118	9e-27	FBpp0302049	610498 combined oxidative phosphorylation deficiency 2; coxpd2;
NP_115970.2	BGIBMGA006861	0.26	214	2e-10	FBpp0086044	610532 leukodystrophy, hypomyelinating, 5; hld5;
NP_619579.1	BGIBMGA000129	0.34	117	1e-07	FBpp0072097	610687 nemaline myopathy 7; nem7;
NP_065109.1	BGIBMGA001056	0.51	248	3e-69	FBpp0289427	610717 neutral lipid storage disease with myopathy; nlsdm;
NP_001974.1	BGIBMGA002482	0.54	212	8e-67	FBpp0086578	610758 cerebrooculofacioskeletal syndrome 4; cofs4;
BAB20376.1	BGIBMGA004445	0.35	252	3e-32	FBpp0087875	610765 ichthyosis with hypotrichosis, autosomal recessive;
BAB20376.1	BGIBMGA005008	0.3	250	1e-21	FBpp0290158	610765 ichthyosis with hypotrichosis, autosomal recessive;
BAB20376.1	BGIBMGA006423	0.27	223	2e-12	FBpp0077252	610765 ichthyosis with hypotrichosis, autosomal recessive;
NP_068813.1	BGIBMGA008278	0.25	260	3e-16	FBpp0112313	610765 ichthyosis with hypotrichosis, autosomal recessive;
NP_068813.1	BGIBMGA009743	0.37	252	6e-40	FBpp0271893	610765 ichthyosis with hypotrichosis, autosomal recessive;
BAB20376.1	BGIBMGA009750	0.4	262	5e-50	FBpp0300317	610765 ichthyosis with hypotrichosis, autosomal recessive;
NP_068813.1	BGIBMGA012786	0.31	152	4e-11	FBpp0076774	610765 ichthyosis with hypotrichosis, autosomal recessive;
NP_068813.1	BGIBMGA014404	0.31	275	3e-27	FBpp0311172	610765 ichthyosis with hypotrichosis, autosomal recessive;
NP_055723.1	BGIBMGA001578	0.31	238	5e-20	FBpp0086267	610768 congenital disorder of glycosylation, type im; cdg1m;
NP_054736.1	BGIBMGA007266	0.69	125	1e-46	FBpp0289083	610798 immunodeficiency due to defect in mapbp-interacting protein;
NP_057700.3	BGIBMGA003518	0.25	262	1e-13	FBpp0081561	610852 ciliary dyskinesia, primary, 6; cild6;
ADZ15459.1	BGIBMGA003675	0.33	131	1e-12	FBpp0081561	610852 ciliary dyskinesia, primary, 6; cild6;
NP_057700.3	BGIBMGA006070	0.29	133	1e-09	FBpp0304761	610852 ciliary dyskinesia, primary, 6; cild6;
ADZ15459.1	BGIBMGA007367	0.29	135	5e-14	FBpp0073750	610852 ciliary dyskinesia, primary, 6; cild6;
NP_057700.3	BGIBMGA010540	0.35	114	9e-11	FBpp0073750	610852 ciliary dyskinesia, primary, 6; cild6;
BAG37968.1	BGIBMGA009191	0.35	462	8e-59	FBpp0304979	610951 ceroid lipofuscinosis, neuronal, 7; cln7;
NP_001077431.1	BGIBMGA003285	0.71	84	1e-27	FBpp0304505	610954 pitt-hopkins syndrome; pths;
NP_478059.1	BGIBMGA012485	0.58	363	1e-106	FBpp0084759	610992 phosphoserine aminotransferase deficiency;
NP_002897.1	BGIBMGA001370	0.27	154	7e-10	FBpp0305320	611022 deafness, autosomal recessive 24; dfnb24;
NP_002897.1	BGIBMGA002543	0.78	67	2e-24	FBpp0300513	611022 deafness, autosomal recessive 24; dfnb24;
NP_002897.1	BGIBMGA002544	0.56	519	1e-152	FBpp0300513	611022 deafness, autosomal recessive 24; dfnb24;
AAH47109.1	BGIBMGA007417	0.22	285	1e-11	FBpp0300514	611022 deafness, autosomal recessive 24; dfnb24;
NP_038463.2	BGIBMGA013941	0.79	63	1e-22	FBpp0309625	611038 microphthalmia, isolated 3; mcop3;
NP_113621.1	BGIBMGA005824	0.37	116	2e-15	FBpp0307926	611040 microphthalmia, isolated 5; mcop5;
BAF83562.1	BGIBMGA009794	0.29	217	1e-12	FBpp0305104	611105 leukoencephalopathy with brainstem and spinal cord involvement and lactate elevation; lbsl;
BAF83562.1	BGIBMGA010863	0.41	507	4e-100	FBpp0304013	611105 leukoencephalopathy with brainstem and spinal cord involvement and lactate elevation; lbsl;
NP_060592.2	BGIBMGA010864	0.43	565	2e-116	FBpp0304013	611105 leukoencephalopathy with brainstem and spinal cord involvement and lactate elevation; lbsl;
NP_689807.1	BGIBMGA000080	0.32	100	2e-06	FBpp0113115	611431 legius syndrome;
NP_689807.1	BGIBMGA008190	0.46	120	1e-18	FBpp0302915	611431 legius syndrome;
NP_064716.2	BGIBMGA000851	0.33	370	1e-59	FBpp0305960	611523 pontocerebellar hypoplasia, type 6; pch6;
NP_064716.2	BGIBMGA008930	0.29	535	3e-50	FBpp0073965	611523 pontocerebellar hypoplasia, type 6; pch6;
NP_006000.2	BGIBMGA002103	0.96	439	0	FBpp0081153	611603 lissencephaly 3; lis3;
NP_006000.2	BGIBMGA002542	0.97	448	0	FBpp0081153	611603 lissencephaly 3; lis3;
NP_006000.2	BGIBMGA004681	0.8	424	0	FBpp0081153	611603 lissencephaly 3; lis3;
NP_006000.2	BGIBMGA013413	0.98	439	0	FBpp0081153	611603 lissencephaly 3; lis3;
NP_064576.1	BGIBMGA006722	0.35	283	8e-43	FBpp0084616	611719 combined oxidative phosphorylation deficiency 5; coxpd5;
NP_694578.1	BGIBMGA000562	0.34	93	2e-07	FBpp0300865	611726 epilepsy, progressive myoclonic 3, with or without intracellular inclusions; epm3;
NP_694578.1	BGIBMGA002294	0.36	97	5e-09	FBpp0288661	611726 epilepsy, progressive myoclonic 3, with or without intracellular inclusions; epm3;
NP_694578.1	BGIBMGA006562	0.43	102	7e-12	FBpp0085430	611726 epilepsy, progressive myoclonic 3, with or without intracellular inclusions; epm3;
NP_694578.1	BGIBMGA011425	0.37	97	7e-09	FBpp0083390	611726 epilepsy, progressive myoclonic 3, with or without intracellular inclusions; epm3;
NP_001836.2	BGIBMGA014039	0.41	1644	0	FBpp0078642	611773 angiopathy, hereditary, with nephropathy, aneurysms, and muscle cramps; hanac; 607595 brain small vessel disease with hemorrhage; 175780 porencephaly 1; poren1;
EAX09109.1	BGIBMGA014040	0.39	1630	0	FBpp0305721	611773 angiopathy, hereditary, with nephropathy, aneurysms, and muscle cramps; hanac; 607595 brain small vessel disease with hemorrhage; 175780 porencephaly 1; poren1;
NP_908932.1	BGIBMGA012827	0.59	337	5e-98	FBpp0297612	611881 glycogen storage disease xii; gsd12;
NP_908932.1	BGIBMGA013021	0.69	362	4e-138	FBpp0308680	611881 glycogen storage disease xii; gsd12;
NP_003681.1	BGIBMGA001077	0.3	153	8e-10	FBpp0292361	612067 dystonia 16; dyt16;
BAD96827.1	BGIBMGA005395	0.37	282	1e-40	FBpp0080076	612067 dystonia 16; dyt16;
BAG61425.1	BGIBMGA006405	0.35	158	9e-18	FBpp0084672	612069 amyotrophic lateral sclerosis 10, with or without frontotemporal dementia; als10;
NP_031401.1	BGIBMGA006832	0.59	271	1e-86	FBpp0290858	612069 amyotrophic lateral sclerosis 10, with or without frontotemporal dementia; als10;
NP_031401.1	BGIBMGA007518	0.58	250	1e-81	FBpp0290858	612069 amyotrophic lateral sclerosis 10, with or without frontotemporal dementia; als10;
BAG61425.1	BGIBMGA007822	0.42	88	6e-11	FBpp0306562	612069 amyotrophic lateral sclerosis 10, with or without frontotemporal dementia; als10;
NP_031401.1	BGIBMGA009577	0.32	158	3e-14	FBpp0305821	612069 amyotrophic lateral sclerosis 10, with or without frontotemporal dementia; als10;
NP_031401.1	BGIBMGA012007	0.52	263	2e-72	FBpp0290858	612069 amyotrophic lateral sclerosis 10, with or without frontotemporal dementia; als10;
BAG61425.1	BGIBMGA012428	0.42	66	3e-09	FBpp0290618	612069 amyotrophic lateral sclerosis 10, with or without frontotemporal dementia; als10;
BAG61425.1	BGIBMGA013464	0.34	158	6e-20	FBpp0082321	612069 amyotrophic lateral sclerosis 10, with or without frontotemporal dementia; als10;
CAE45708.1	BGIBMGA007783	0.61	380	5e-129	FBpp0291001	612073 html::element=hash(0x1c14b48);
BAA91939.1	BGIBMGA007824	0.47	377	3e-93	FBpp0311088	612073 html::element=hash(0x1c14b48);
NP_056528.2	BGIBMGA013510	0.76	336	3e-140	FBpp0087152	612075 mitochondrial dna depletion syndrome 8a (encephalomyopathic type with renal tubulopathy); mtdps8a; 613077 progressive external ophthalmoplegia with mitochondrial dna deletions, autosomal dominant, 5; peoa5;
NP_060547.2	BGIBMGA009285	0.31	685	7e-60	FBpp0072239	612079 alopecia, neurologic defects, and endocrinopathy syndrome;
NP_061815.2	BGIBMGA009730	0.56	66	6e-11	FBpp0309584	612109 oculoauricular syndrome;
NP_061815.2	BGIBMGA010035	0.45	74	3e-10	FBpp0297666	612109 oculoauricular syndrome;
NP_061815.2	BGIBMGA010054	0.45	77	5e-11	FBpp0083439	612109 oculoauricular syndrome;
NP_061815.2	BGIBMGA010810	0.72	109	2e-32	FBpp0312056	612109 oculoauricular syndrome;
NP_061815.2	BGIBMGA010833	0.59	63	5e-15	FBpp0303415	612109 oculoauricular syndrome;
NP_065390.1	BGIBMGA005834	0.32	206	2e-18	FBpp0308004	612132 ectodermal dysplasia, anhidrotic, with t-cell immunodeficiency, autosomal dominant;
NP_958786.1	BGIBMGA001247	0.23	475	5e-09	FBpp0309608	612138 epidermolysis bullosa simplex with pyloric atresia; 131950 epidermolysis bullosa simplex, ogna type; 226670 epidermolysis bullosa simplex with muscular dystrophy; 613723 muscular dystrophy, limb-girdle, type 2q; lgmd2q;
NP_958786.1	BGIBMGA004409	0.8	85	2e-35	FBpp0293390	612138 epidermolysis bullosa simplex with pyloric atresia; 131950 epidermolysis bullosa simplex, ogna type; 226670 epidermolysis bullosa simplex with muscular dystrophy; 613723 muscular dystrophy, limb-girdle, type 2q; lgmd2q;
NP_958786.1	BGIBMGA004411	0.31	123	4e-12	FBpp0293393	612138 epidermolysis bullosa simplex with pyloric atresia; 131950 epidermolysis bullosa simplex, ogna type; 226670 epidermolysis bullosa simplex with muscular dystrophy; 613723 muscular dystrophy, limb-girdle, type 2q; lgmd2q;
NP_958786.1	BGIBMGA004412	0.34	315	3e-37	FBpp0293393	612138 epidermolysis bullosa simplex with pyloric atresia; 131950 epidermolysis bullosa simplex, ogna type; 226670 epidermolysis bullosa simplex with muscular dystrophy; 613723 muscular dystrophy, limb-girdle, type 2q; lgmd2q;
CAA91196.1	BGIBMGA004414	0.21	1328	3e-19	FBpp0086747	612138 epidermolysis bullosa simplex with pyloric atresia; 131950 epidermolysis bullosa simplex, ogna type; 226670 epidermolysis bullosa simplex with muscular dystrophy; 613723 muscular dystrophy, limb-girdle, type 2q; lgmd2q;
NP_958780.1	BGIBMGA004608	0.26	240	1e-10	FBpp0074217	612138 epidermolysis bullosa simplex with pyloric atresia; 131950 epidermolysis bullosa simplex, ogna type; 226670 epidermolysis bullosa simplex with muscular dystrophy; 613723 muscular dystrophy, limb-girdle, type 2q; lgmd2q;
NP_958786.1	BGIBMGA009558	0.25	306	2e-07	FBpp0288458	612138 epidermolysis bullosa simplex with pyloric atresia; 131950 epidermolysis bullosa simplex, ogna type; 226670 epidermolysis bullosa simplex with muscular dystrophy; 613723 muscular dystrophy, limb-girdle, type 2q; lgmd2q;
CAA65765.1	BGIBMGA009944	0.28	197	8e-09	FBpp0308499	612138 epidermolysis bullosa simplex with pyloric atresia; 131950 epidermolysis bullosa simplex, ogna type; 226670 epidermolysis bullosa simplex with muscular dystrophy; 613723 muscular dystrophy, limb-girdle, type 2q; lgmd2q;
CAA65765.1	BGIBMGA011331	0.22	301	2e-11	FBpp0302975	612138 epidermolysis bullosa simplex with pyloric atresia; 131950 epidermolysis bullosa simplex, ogna type; 226670 epidermolysis bullosa simplex with muscular dystrophy; 613723 muscular dystrophy, limb-girdle, type 2q; lgmd2q;
NP_955472.1	BGIBMGA007349	0.75	556	0	FBpp0073291	612233 leukodystrophy, hypomyelinating, 4; hld4; 605280 spastic paraplegia 13, autosomal dominant; spg13;
NP_001092757.1	BGIBMGA010670	0.63	104	2e-09	FBpp0077333	612281 ichthyosis, congenital, autosomal recessive 6; arci6;
NP_006726.1	BGIBMGA006400	0.64	103	2e-28	FBpp0088336	612290 microtia, hearing impairment, and cleft palate;
NP_006726.1	BGIBMGA010980	0.64	59	7e-16	FBpp0306007	612290 microtia, hearing impairment, and cleft palate;
NP_006726.1	BGIBMGA011098	0.47	77	3e-14	FBpp0310398	612290 microtia, hearing impairment, and cleft palate;
NP_077282.3	BGIBMGA013607	0.44	242	3e-57	FBpp0290181	612319 spastic paraplegia 35, autosomal recessive; spg35;
NP_001121697.1	BGIBMGA002345	0.55	169	2e-39	FBpp0292153	612350 spondylocheirodysplasia, ehlers-danlos syndrome-like;
NP_689477.2	BGIBMGA002971	0.47	149	8e-32	FBpp0080687	612350 spondylocheirodysplasia, ehlers-danlos syndrome-like;
NP_001075.1	BGIBMGA000704	0.58	251	6e-90	FBpp0075918	612394 bone fragility with contractures, arterial rupture, and deafness;
NP_694571.2	BGIBMGA012620	0.7	111	3e-35	FBpp0302897	612437 epilepsy, progressive myoclonic 1b; epm1b;
NP_694571.2	BGIBMGA012680	0.46	101	3e-25	FBpp0291923	612437 epilepsy, progressive myoclonic 1b; epm1b;
NP_005997.2	BGIBMGA001602	0.28	158	6e-14	FBpp0070113	612447 skeletal defects, genital hypoplasia, and mental retardation;
NP_005997.2	BGIBMGA001775	0.25	198	3e-08	FBpp0112097	612447 skeletal defects, genital hypoplasia, and mental retardation;
CAA79489.1	BGIBMGA001804	0.32	158	4e-18	FBpp0082061	612447 skeletal defects, genital hypoplasia, and mental retardation;
NP_005997.2	BGIBMGA004431	0.28	212	1e-20	FBpp0079702	612447 skeletal defects, genital hypoplasia, and mental retardation;
NP_005997.2	BGIBMGA008173	0.25	107	2e-09	FBpp0080387	612447 skeletal defects, genital hypoplasia, and mental retardation;
CAA79489.1	BGIBMGA008751	0.27	219	2e-19	FBpp0310714	612447 skeletal defects, genital hypoplasia, and mental retardation;
CAA79489.1	BGIBMGA008782	0.26	250	8e-29	FBpp0079702	612447 skeletal defects, genital hypoplasia, and mental retardation;
NP_005997.2	BGIBMGA011989	0.3	106	3e-09	FBpp0083307	612447 skeletal defects, genital hypoplasia, and mental retardation;
CAA79489.1	BGIBMGA013621	0.3	223	2e-27	FBpp0072448	612447 skeletal defects, genital hypoplasia, and mental retardation;
NP_778203.1	BGIBMGA002413	0.33	606	3e-91	FBpp0078557	612540 myopathy, congenital, compton-north;
NP_778203.1	BGIBMGA005747	0.23	870	1e-43	FBpp0303245	612540 myopathy, congenital, compton-north;
NP_778203.1	BGIBMGA008686	0.29	199	1e-10	FBpp0110104	612540 myopathy, congenital, compton-north;
NP_778203.1	BGIBMGA012049	0.31	134	9e-10	FBpp0297092	612540 myopathy, congenital, compton-north;
NP_778203.1	BGIBMGA013795	0.25	802	8e-44	FBpp0303245	612540 myopathy, congenital, compton-north;
NP_006763.2	BGIBMGA007885	0.36	486	1e-80	FBpp0309496	612621 mental retardation, autosomal dominant 5; mrd5;
BAA76780.2	BGIBMGA004222	0.35	296	1e-39	FBpp0292091	612651 endocrine-cerebroosteodysplasia; eco;
BAG52026.1	BGIBMGA012011	0.68	284	2e-109	FBpp0304023	612651 endocrine-cerebroosteodysplasia; eco;
BAC11357.1	BGIBMGA008194	0.32	194	3e-27	FBpp0085765	612674 polyneuropathy, hearing loss, ataxia, retinitis pigmentosa, and cataract; pharc;
NP_056415.1	BGIBMGA008195	0.38	137	5e-21	FBpp0085765	612674 polyneuropathy, hearing loss, ataxia, retinitis pigmentosa, and cataract; pharc;
EAX10090.1	BGIBMGA013318	0.31	177	1e-14	FBpp0077328	612674 polyneuropathy, hearing loss, ataxia, retinitis pigmentosa, and cataract; pharc;
NP_689656.2	BGIBMGA000813	0.47	297	3e-53	FBpp0307927	612712 leber congenital amaurosis 13; lca13;
NP_689656.2	BGIBMGA002979	0.29	136	3e-08	FBpp0307927	612712 leber congenital amaurosis 13; lca13;
NP_689656.2	BGIBMGA003364	0.4	92	1e-14	FBpp0310903	612712 leber congenital amaurosis 13; lca13;
NP_689656.2	BGIBMGA004341	0.43	272	3e-46	FBpp0087994	612712 leber congenital amaurosis 13; lca13;
NP_689656.2	BGIBMGA005208	0.43	282	4e-53	FBpp0310903	612712 leber congenital amaurosis 13; lca13;
NP_689656.2	BGIBMGA005730	0.25	199	3e-12	FBpp0307202	612712 leber congenital amaurosis 13; lca13;
NP_689656.2	BGIBMGA006083	0.25	198	3e-09	FBpp0310597	612712 leber congenital amaurosis 13; lca13;
NP_689656.2	BGIBMGA007912	0.38	286	4e-40	FBpp0087997	612712 leber congenital amaurosis 13; lca13;
NP_689656.2	BGIBMGA010738	0.41	285	2e-48	FBpp0310903	612712 leber congenital amaurosis 13; lca13;
NP_689656.2	BGIBMGA010875	0.42	112	4e-14	FBpp0301170	612712 leber congenital amaurosis 13; lca13;
NP_689656.2	BGIBMGA012074	0.34	263	7e-36	FBpp0310597	612712 leber congenital amaurosis 13; lca13;
NP_689656.2	BGIBMGA012375	0.36	280	7e-34	FBpp0310904	612712 leber congenital amaurosis 13; lca13;
NP_689656.2	BGIBMGA012527	0.4	283	5e-47	FBpp0310903	612712 leber congenital amaurosis 13; lca13;
NP_689656.2	BGIBMGA012574	0.47	282	2e-58	FBpp0307927	612712 leber congenital amaurosis 13; lca13;
NP_689656.2	BGIBMGA013364	0.27	247	5e-14	FBpp0307927	612712 leber congenital amaurosis 13; lca13;
NP_115998.2	BGIBMGA013666	0.41	125	1e-23	FBpp0304538	612714 exocrine pancreatic insufficiency, dyserythropoietic anemia, and calvarial hyperostosis;
NP_115998.2	BGIBMGA013680	0.47	125	2e-27	FBpp0304538	612714 exocrine pancreatic insufficiency, dyserythropoietic anemia, and calvarial hyperostosis;
NP_003115.1	BGIBMGA009104	0.36	255	7e-38	FBpp0071184	612716 dystonia, dopa-responsive, due to sepiapterin reductase deficiency;
NP_116179.2	BGIBMGA006616	0.55	197	6e-41	FBpp0307679	612782 html::element=hash(0x1af7c38);
NP_116179.2	BGIBMGA012991	0.43	210	7e-43	FBpp0307680	612782 html::element=hash(0x1af7c38);
NP_003147.2	BGIBMGA009254	0.5	138	1e-34	FBpp0292600	612783 html::element=hash(0x16b3498);
NP_003147.2	BGIBMGA009255	0.36	243	8e-27	FBpp0292600	612783 html::element=hash(0x16b3498);
NP_004713.2	BGIBMGA007825	0.24	453	1e-25	FBpp0304594	612936 spastic paraplegia 50, autosomal recessive; spg50;
BAG60002.1	BGIBMGA005727	0.44	268	9e-50	FBpp0082895	612940 cutis laxa, autosomal recessive, type iib; arcl2b;
NP_722546.1	BGIBMGA006364	0.42	172	1e-33	FBpp0083127	612940 cutis laxa, autosomal recessive, type iib; arcl2b;
BAB71175.1	BGIBMGA002863	0.26	230	6e-14	FBpp0306532	612943 retinitis pigmentosa 42; rp42;
NP_001026880.2	BGIBMGA004699	0.27	484	2e-46	FBpp0082865	612943 retinitis pigmentosa 42; rp42;
NP_061334.4	BGIBMGA005139	0.26	185	8e-14	FBpp0297319	612943 retinitis pigmentosa 42; rp42;
NP_001026880.2	BGIBMGA006093	0.34	525	5e-74	FBpp0075260	612943 retinitis pigmentosa 42; rp42;
NP_001165899.1	BGIBMGA006426	0.3	104	2e-06	FBpp0310324	612943 retinitis pigmentosa 42; rp42;
NP_001026880.2	BGIBMGA007155	0.27	243	1e-20	FBpp0297319	612943 retinitis pigmentosa 42; rp42;
NP_001026880.2	BGIBMGA007372	0.27	552	2e-47	FBpp0080596	612943 retinitis pigmentosa 42; rp42;
NP_001026880.2	BGIBMGA007941	0.25	184	8e-06	FBpp0306413	612943 retinitis pigmentosa 42; rp42;
NP_001165899.1	BGIBMGA008942	0.3	104	7e-06	FBpp0310200	612943 retinitis pigmentosa 42; rp42;
NP_001026880.2	BGIBMGA010339	0.24	557	7e-47	FBpp0112409	612943 retinitis pigmentosa 42; rp42;
NP_061334.4	BGIBMGA010565	0.24	269	4e-07	FBpp0304872	612943 retinitis pigmentosa 42; rp42;
NP_001026880.2	BGIBMGA011506	0.3	353	4e-35	FBpp0309116	612943 retinitis pigmentosa 42; rp42;
NP_001026880.2	BGIBMGA011859	0.27	555	1e-47	FBpp0112409	612943 retinitis pigmentosa 42; rp42;
NP_001026880.2	BGIBMGA012495	0.33	135	3e-09	FBpp0306413	612943 retinitis pigmentosa 42; rp42;
NP_001026880.2	BGIBMGA013583	0.2	219	6e-09	FBpp0305171	612943 retinitis pigmentosa 42; rp42;
NP_003721.2	BGIBMGA010520	0.31	131	6e-17	FBpp0076469	612951 leukoencephalopathy, cystic, without megalencephaly;
NP_061866.1	BGIBMGA008358	0.28	319	1e-18	FBpp0307844	613075 macrocephaly, alopecia, cutis laxa, and scoliosis;
NP_001368.2	BGIBMGA000909	0.27	1219	4e-131	FBpp0271926	613091 asphyxiating thoracic dystrophy 3; atd3; 263520 short rib-polydactyly syndrome, type iia; 263510 short rib-polydactyly syndrome, type iii;
NP_001368.2	BGIBMGA000911	0.38	540	2e-81	FBpp0271926	613091 asphyxiating thoracic dystrophy 3; atd3; 263520 short rib-polydactyly syndrome, type iia; 263510 short rib-polydactyly syndrome, type iii;
NP_001368.2	BGIBMGA000912	0.52	163	5e-43	FBpp0271926	613091 asphyxiating thoracic dystrophy 3; atd3; 263520 short rib-polydactyly syndrome, type iia; 263510 short rib-polydactyly syndrome, type iii;
NP_001073932.1	BGIBMGA000913	0.26	1274	6e-88	FBpp0271926	613091 asphyxiating thoracic dystrophy 3; atd3; 263520 short rib-polydactyly syndrome, type iia; 263510 short rib-polydactyly syndrome, type iii;
NP_001368.2	BGIBMGA001546	0.3	2049	0	FBpp0073215	613091 asphyxiating thoracic dystrophy 3; atd3; 263520 short rib-polydactyly syndrome, type iia; 263510 short rib-polydactyly syndrome, type iii;
CAD98012.1	BGIBMGA001547	0.26	1292	3e-136	FBpp0304991	613091 asphyxiating thoracic dystrophy 3; atd3; 263520 short rib-polydactyly syndrome, type iia; 263510 short rib-polydactyly syndrome, type iii;
AAB09728.1	BGIBMGA010474	0.47	72	6e-14	FBpp0312296	613091 asphyxiating thoracic dystrophy 3; atd3; 263520 short rib-polydactyly syndrome, type iia; 263510 short rib-polydactyly syndrome, type iii;
AAC50179.2	BGIBMGA006857	0.42	526	6e-124	FBpp0290622	613135 parkinsonism-dystonia, infantile; pkdys; 143465 attention deficit-hyperactivity disorder; adhd; 125480 major affective disorder 1; mafd1; 188890 tobacco addiction, susceptibility to;
NP_037514.2	BGIBMGA005070	0.54	270	4e-77	FBpp0070134	613150 muscular dystrophy-dystroglycanopathy (congenital with brain and eye anomalies), type a, 2; mddga2; 613156 muscular dystrophy-dystroglycanopathy (congenital with mental retardation), type b, 2; mddgb2; 613158 muscular dystrophy-dystroglycanopathy (limb-girdle), type c, 2; mddgc2;
NP_077277.1	BGIBMGA001878	0.36	431	4e-67	FBpp0071482	613153 muscular dystrophy-dystroglycanopathy (congenital with brain and eye anomalies), type a, 5; mddga5; 606612 muscular dystrophy-dystroglycanopathy (congenital with or without mental retardation), type b, 5; mddgb5; 607155 muscular dystrophy-dystroglycanopathy (limb-girdle), type c, 5; mddgc5;
NP_598397.1	BGIBMGA004930	0.24	234	4e-07	FBpp0112197	613154 muscular dystrophy-dystroglycanopathy (congenital with brain and eye anomalies), type a, 6; mddga6; 608840 muscular dystrophy-dystroglycanopathy (congenital with mental retardation), type b, 6; mddgb6;
BAA25535.3	BGIBMGA009403	0.44	338	5e-81	FBpp0112197	613154 muscular dystrophy-dystroglycanopathy (congenital with brain and eye anomalies), type a, 6; mddga6; 608840 muscular dystrophy-dystroglycanopathy (congenital with mental retardation), type b, 6; mddgb6;
NP_598397.1	BGIBMGA013719	0.23	253	1e-16	FBpp0293957	613154 muscular dystrophy-dystroglycanopathy (congenital with brain and eye anomalies), type a, 6; mddga6; 608840 muscular dystrophy-dystroglycanopathy (congenital with mental retardation), type b, 6; mddgb6;
CAG33677.1	BGIBMGA007934	0.37	308	8e-48	FBpp0070025	613159 nephronophthisis-like nephropathy 1; nphpl1;
NP_057411.1	BGIBMGA001536	0.6	382	2e-137	FBpp0081276	613161 beta-ureidopropionase deficiency;
NP_057411.1	BGIBMGA001595	0.59	380	3e-123	FBpp0081276	613161 beta-ureidopropionase deficiency;
NP_057411.1	BGIBMGA006965	0.58	237	2e-75	FBpp0081276	613161 beta-ureidopropionase deficiency;
NP_057411.1	BGIBMGA011188	0.27	213	4e-10	FBpp0072385	613161 beta-ureidopropionase deficiency;
NP_065737.2	BGIBMGA006823	0.52	462	3e-146	FBpp0310512	613163 gaba-transaminase deficiency;
CAA25320.1	BGIBMGA011774	0.53	285	2e-86	FBpp0072834	613179 purine nucleoside phosphorylase deficiency;
BAC05327.1	BGIBMGA013895	0.28	180	2e-07	FBpp0311789	613179 purine nucleoside phosphorylase deficiency;
NP_061816.1	BGIBMGA007790	0.55	128	2e-30	FBpp0081153	613180 polymicrogyria with optic nerve hypoplasia;
NP_113654.4	BGIBMGA008989	0.34	1002	2e-147	FBpp0080933	613192 mental retardation, autosomal recessive 13; mrt13;
NP_620688.2	BGIBMGA002645	0.27	468	3e-28	FBpp0301591	613195 weill-marchesani-like syndrome;
NP_620688.2	BGIBMGA004365	0.28	202	5e-16	FBpp0288559	613195 weill-marchesani-like syndrome;
NP_620688.2	BGIBMGA013968	0.28	187	2e-25	FBpp0298832	613195 weill-marchesani-like syndrome;
NP_004047.3	BGIBMGA009245	0.34	241	1e-30	FBpp0310005	613227 cerebellar ataxia, mental retardation, and dysequilibrium syndrome 3; camrq3;
NP_001596.2	BGIBMGA006216	0.53	526	1e-136	FBpp0079326	613287 charcot-marie-tooth disease, axonal, type 2n; cmt2n;
NP_113671.3	BGIBMGA003648	0.29	353	9e-40	FBpp0072169	613385 autoimmune disease, syndromic multisystem;
NP_113671.3	BGIBMGA003682	0.52	46	3e-09	FBpp0288697	613385 autoimmune disease, syndromic multisystem;
NP_113671.3	BGIBMGA005933	0.49	862	0	FBpp0308612	613385 autoimmune disease, syndromic multisystem;
NP_113671.3	BGIBMGA006621	0.33	351	2e-48	FBpp0306037	613385 autoimmune disease, syndromic multisystem;
NP_113671.3	BGIBMGA006636	0.46	66	2e-09	FBpp0292727	613385 autoimmune disease, syndromic multisystem;
NP_113671.3	BGIBMGA006637	0.44	378	2e-73	FBpp0292727	613385 autoimmune disease, syndromic multisystem;
NP_113671.3	BGIBMGA007076	0.43	464	3e-107	FBpp0305371	613385 autoimmune disease, syndromic multisystem;
NP_113671.3	BGIBMGA012636	0.48	461	6e-127	FBpp0304228	613385 autoimmune disease, syndromic multisystem;
NP_001138498.1	BGIBMGA001079	0.48	210	9e-54	FBpp0303823	613391 deafness, autosomal recessive 84a; dfnb84a;
NP_001138498.1	BGIBMGA005642	0.27	262	9e-09	FBpp0074525	613391 deafness, autosomal recessive 84a; dfnb84a;
NP_085911.2	BGIBMGA008087	0.35	855	9e-143	FBpp0070235	613398 warsaw breakage syndrome; wabs;
NP_009185.2	BGIBMGA005374	0.41	433	1e-88	FBpp0081343	613402 epileptic encephalopathy, early infantile, 10; eiee10;
NP_001180245.1	BGIBMGA010731	0.28	188	1e-12	FBpp0084899	613404 arthrogryposis, renal dysfunction, and cholestasis 2; arcs2;
AAA62830.1	BGIBMGA000612	0.37	462	7e-63	FBpp0076320	613426 cardiomyopathy, dilated, 1s; cmd1s; 192600 cardiomyopathy, familial hypertrophic, 1; cmh1; 160500 myopathy, distal, 1; mpd1; 608358 myopathy, myosin storage; 181430 scapuloperoneal myopathy, myh7-related; spmm;
CAA37068.1	BGIBMGA000864	0.21	1053	9e-27	FBpp0304727	613426 cardiomyopathy, dilated, 1s; cmd1s; 192600 cardiomyopathy, familial hypertrophic, 1; cmh1; 160500 myopathy, distal, 1; mpd1; 608358 myopathy, myosin storage; 181430 scapuloperoneal myopathy, myh7-related; spmm;
AAA62830.1	BGIBMGA005293	0.2	543	6e-06		613426 cardiomyopathy, dilated, 1s; cmd1s; 192600 cardiomyopathy, familial hypertrophic, 1; cmh1; 160500 myopathy, distal, 1; mpd1; 608358 myopathy, myosin storage; 181430 scapuloperoneal myopathy, myh7-related; spmm;
AAA62830.1	BGIBMGA006926	0.19	478	9e-12		613426 cardiomyopathy, dilated, 1s; cmd1s; 192600 cardiomyopathy, familial hypertrophic, 1; cmh1; 160500 myopathy, distal, 1; mpd1; 608358 myopathy, myosin storage; 181430 scapuloperoneal myopathy, myh7-related; spmm;
NP_000248.2	BGIBMGA014226	0.6	370	2e-121	FBpp0080456	613426 cardiomyopathy, dilated, 1s; cmd1s; 192600 cardiomyopathy, familial hypertrophic, 1; cmh1; 160500 myopathy, distal, 1; mpd1; 608358 myopathy, myosin storage; 181430 scapuloperoneal myopathy, myh7-related; spmm;
NP_005240.3	BGIBMGA010297	0.83	119	3e-53	FBpp0077189	613454 rett syndrome, congenital variant;
CAA52239.1	BGIBMGA010490	0.82	118	6e-51	FBpp0077189	613454 rett syndrome, congenital variant;
NP_005240.3	BGIBMGA014268	0.59	83	1e-24	FBpp0077188	613454 rett syndrome, congenital variant;
NP_003118.2	BGIBMGA007948	0.61	2394	0	FBpp0072672	613477 epileptic encephalopathy, early infantile, 5; eiee5;
NP_003118.2	BGIBMGA012171	0.25	2139	7e-171	FBpp0304367	613477 epileptic encephalopathy, early infantile, 5; eiee5;
NP_003118.2	BGIBMGA012251	0.26	202	1e-07	FBpp0072540	613477 epileptic encephalopathy, early infantile, 5; eiee5;
AAI28146.1	BGIBMGA006072	0.3	215	2e-22	FBpp0079628	613489 congenital disorder of glycosylation, type iij; cdg2j;
NP_001182058.1	BGIBMGA008280	0.3	235	3e-21	FBpp0082847	613517 microphthalmia, isolated 6; mcop6;
NP_001182058.1	BGIBMGA008281	0.3	236	2e-21	FBpp0082846	613517 microphthalmia, isolated 6; mcop6;
NP_001182058.1	BGIBMGA010584	0.33	233	4e-22	FBpp0076774	613517 microphthalmia, isolated 6; mcop6;
NP_689482.1	BGIBMGA006615	0.45	118	9e-23	FBpp0309036	613559 combined oxidative phosphorylation deficiency 7; coxpd7;
NP_005392.2	BGIBMGA010558	0.29	153	1e-07	FBpp0302878	613611 choanal atresia and lymphedema;
BAF84330.1	BGIBMGA011269	0.31	605	5e-70	FBpp0303668	613611 choanal atresia and lymphedema;
NP_005392.2	BGIBMGA013669	0.3	172	2e-10	FBpp0303262	613611 choanal atresia and lymphedema;
NP_005539.1	BGIBMGA002984	0.7	515	0	FBpp0292593	613641 charcot-marie-tooth disease, recessive intermediate b; cmtrib;
NP_149091.1	BGIBMGA010542	0.29	677	1e-53	FBpp0293208	613660 cone-rod dystrophy 15; cord15;
NP_001004127.2	BGIBMGA009458	0.51	83	1e-06	FBpp0305584	613661 congenital disorder of glycosylation, type ip; cdg1p;
AAI11023.1	BGIBMGA014572	0.46	252	2e-67	FBpp0305584	613661 congenital disorder of glycosylation, type ip; cdg1p;
NP_004259.3	BGIBMGA005197	0.42	642	5e-136	FBpp0082980	613668 microcephaly, postnatal progressive, with seizures and brain atrophy;
BAB13981.1	BGIBMGA008572	0.23	349	2e-20	FBpp0312208	613672 spastic ataxia 4, autosomal recessive; spax4;
NP_060579.3	BGIBMGA008573	0.36	419	4e-67	FBpp0304567	613672 spastic ataxia 4, autosomal recessive; spax4;
NP_060579.3	BGIBMGA012377	0.31	176	2e-13	FBpp0293575	613672 spastic ataxia 4, autosomal recessive; spax4;
NP_000497.1	BGIBMGA012923	0.28	256	1e-13	FBpp0304588	613679 prothrombin deficiency, congenital; 601367 stroke, ischemic; 188050 thrombophilia due to thrombin defect; thph1;
NP_689918.1	BGIBMGA005798	0.49	51	3e-07	FBpp0070425	613717 treacher collins syndrome 2; tcs2;
NP_057056.1	BGIBMGA006752	0.38	82	6e-12	FBpp0080564	613717 treacher collins syndrome 2; tcs2;
NP_932346.1	BGIBMGA007514	0.54	124	8e-38	FBpp0081772	613718 deafness, autosomal recessive 74; dfnb74;
NP_060545.3	BGIBMGA014066	0.37	86	2e-10	FBpp0311120	613728 spinocerebellar ataxia, autosomal recessive 10; scar10;
AAI26309.1	BGIBMGA002914	0.28	563	8e-59	FBpp0305942	613744 spastic paraplegia 51, autosomal recessive; spg51;
AAI26309.1	BGIBMGA005466	0.24	528	6e-42	FBpp0088490	613744 spastic paraplegia 51, autosomal recessive; spg51;
AAI26309.1	BGIBMGA007745	0.26	420	3e-36	FBpp0073673	613744 spastic paraplegia 51, autosomal recessive; spg51;
NP_006168.1	BGIBMGA013554	0.32	227	2e-24	FBpp0290883	613750 retinitis pigmentosa 27; rp27;
NP_001876.1	BGIBMGA000944	0.41	87	2e-13	FBpp0074503	613763 cataract 16, multiple types; ctrct16; 608810 myopathy, myofibrillar, 2; mfm2; 613869 myopathy, myofibrillar, fatal infantile hypertonic, alpha-b crystallin-related;
NP_001876.1	BGIBMGA004101	0.37	154	8e-20	FBpp0307666	613763 cataract 16, multiple types; ctrct16; 608810 myopathy, myofibrillar, 2; mfm2; 613869 myopathy, myofibrillar, fatal infantile hypertonic, alpha-b crystallin-related;
AAC19161.1	BGIBMGA004103	0.41	159	9e-23	FBpp0307666	613763 cataract 16, multiple types; ctrct16; 608810 myopathy, myofibrillar, 2; mfm2; 613869 myopathy, myofibrillar, fatal infantile hypertonic, alpha-b crystallin-related;
NP_001876.1	BGIBMGA004515	0.43	143	2e-25	FBpp0307666	613763 cataract 16, multiple types; ctrct16; 608810 myopathy, myofibrillar, 2; mfm2; 613869 myopathy, myofibrillar, fatal infantile hypertonic, alpha-b crystallin-related;
ACP18852.1	BGIBMGA004540	0.44	156	7e-26	FBpp0307666	613763 cataract 16, multiple types; ctrct16; 608810 myopathy, myofibrillar, 2; mfm2; 613869 myopathy, myofibrillar, fatal infantile hypertonic, alpha-b crystallin-related;
NP_001876.1	BGIBMGA004541	0.47	149	1e-20	FBpp0307666	613763 cataract 16, multiple types; ctrct16; 608810 myopathy, myofibrillar, 2; mfm2; 613869 myopathy, myofibrillar, fatal infantile hypertonic, alpha-b crystallin-related;
NP_001876.1	BGIBMGA004606	0.45	143	1e-27	FBpp0307666	613763 cataract 16, multiple types; ctrct16; 608810 myopathy, myofibrillar, 2; mfm2; 613869 myopathy, myofibrillar, fatal infantile hypertonic, alpha-b crystallin-related;
NP_001876.1	BGIBMGA004630	0.42	143	2e-25	FBpp0307666	613763 cataract 16, multiple types; ctrct16; 608810 myopathy, myofibrillar, 2; mfm2; 613869 myopathy, myofibrillar, fatal infantile hypertonic, alpha-b crystallin-related;
NP_001876.1	BGIBMGA005780	0.48	97	4e-14	FBpp0307666	613763 cataract 16, multiple types; ctrct16; 608810 myopathy, myofibrillar, 2; mfm2; 613869 myopathy, myofibrillar, fatal infantile hypertonic, alpha-b crystallin-related;
NP_001876.1	BGIBMGA005784	0.4	116	8e-21	FBpp0307666	613763 cataract 16, multiple types; ctrct16; 608810 myopathy, myofibrillar, 2; mfm2; 613869 myopathy, myofibrillar, fatal infantile hypertonic, alpha-b crystallin-related;
NP_001876.1	BGIBMGA013545	0.29	119	1e-06	FBpp0307666	613763 cataract 16, multiple types; ctrct16; 608810 myopathy, myofibrillar, 2; mfm2; 613869 myopathy, myofibrillar, fatal infantile hypertonic, alpha-b crystallin-related;
BAA22032.1	BGIBMGA009650	0.65	432	2e-162	FBpp0309145	613795 loeys-dietz syndrome, type 3; lds3;
NP_859526.1	BGIBMGA009708	0.32	316	4e-50	FBpp0072330	613800 meier-gorlin syndrome 2; mgors2;
NP_055136.1	BGIBMGA004270	0.3	240	2e-14	FBpp0087566	613803 meier-gorlin syndrome 3; mgors3;
AAH21126.1	BGIBMGA011818	0.35	369	8e-58	FBpp0309018	613804 meier-gorlin syndrome 4; mgors4;
NP_001245.1	BGIBMGA006195	0.39	361	2e-59	FBpp0076371	613805 meier-gorlin syndrome 5; mgors5;
NP_004384.4	BGIBMGA001934	0.27	256	4e-11		613818 muscular dystrophy-dystroglycanopathy (limb-girdle), type c, 9; mddgc9;
NP_004384.4	BGIBMGA001935	0.33	333	1e-44	FBpp0297348	613818 muscular dystrophy-dystroglycanopathy (limb-girdle), type c, 9; mddgc9;
NP_004718.1	BGIBMGA001977	0.58	207	3e-63	FBpp0292911	613830 night blindness, congenital stationary, type 1d; csnb1d;
NP_004718.1	BGIBMGA001978	0.62	212	1e-71	FBpp0307474	613830 night blindness, congenital stationary, type 1d; csnb1d;
NP_942559.1	BGIBMGA006404	0.47	184	8e-47	FBpp0086110	613832 epilepsy, progressive myoclonic 5; epm5;
NP_942559.1	BGIBMGA012622	0.66	182	6e-78	FBpp0088115	613832 epilepsy, progressive myoclonic 5; epm5;
NP_000782.1	BGIBMGA013340	0.41	181	1e-33	FBpp0110210	613839 megaloblastic anemia due to dihydrofolate reductase deficiency;
NP_003313.3	BGIBMGA009293	0.58	266	1e-88	FBpp0088961	613843 leber congenital amaurosis 15; lca15; 600132 retinitis pigmentosa 14; rp14;
NP_690599.1	BGIBMGA006942	0.7	109	2e-43	FBpp0303753	613849 osteogenesis imperfecta, type xii; oi12;
NP_690599.1	BGIBMGA006943	0.41	358	2e-57	FBpp0301973	613849 osteogenesis imperfecta, type xii; oi12;
NP_995583.1	BGIBMGA001279	0.67	105	2e-37	FBpp0303850	613861 retinitis pigmentosa 59; rp59;
NP_079163.2	BGIBMGA001280	0.45	127	4e-26	FBpp0303850	613861 retinitis pigmentosa 59; rp59;
NP_006334.2	BGIBMGA002597	0.32	285	4e-41	FBpp0307787	613862 retinitis pigmentosa 38; rp38;
NP_002657.3	BGIBMGA013593	0.28	107	2e-06	FBpp0307010	613877 lipodystrophy, familial partial, type 4; fpld4;
NP_002657.3	BGIBMGA013612	0.22	230	8e-07	FBpp0110268	613877 lipodystrophy, familial partial, type 4; fpld4;
NP_036601.2	BGIBMGA008459	0.23	243	3e-06	FBpp0070402	613983 retinitis pigmentosa 60; rp60;
NP_036601.2	BGIBMGA008911	0.71	934	0	FBpp0074835	613983 retinitis pigmentosa 60; rp60;
NP_060308.1	BGIBMGA000029	0.42	153	1e-23	FBpp0305289	613987 dyskeratosis congenita, autosomal recessive, 2; dkcb2;
NP_060308.1	BGIBMGA007661	0.29	89	5e-07	FBpp0311460	613987 dyskeratosis congenita, autosomal recessive, 2; dkcb2;
NP_060308.1	BGIBMGA011920	0.36	118	2e-19	FBpp0077676	613987 dyskeratosis congenita, autosomal recessive, 2; dkcb2;
NP_060551.2	BGIBMGA008533	0.36	361	2e-60	FBpp0312024	613988 dyskeratosis congenita, autosomal recessive, 3; dkcb3;
NP_003851.1	BGIBMGA010668	0.76	88	3e-37	FBpp0305308	614008 nestor-guillermo progeria syndrome; ngps;
NP_113615.2	BGIBMGA001688	0.61	127	2e-40	FBpp0087638	614017 ciliary dyskinesia, primary, 16; cild16;
EAW53933.1	BGIBMGA007247	0.42	254	6e-45	FBpp0112072	614019 lissencephaly 4; lis4;
NP_006077.2	BGIBMGA003441	0.89	64	3e-29	FBpp0310087	614039 html::element=hash(0x24b80b0); 600638 fibrosis of extraocular muscles, congenital, 3a, with or without extraocular involvement; cfeom3a;
NP_060336.3	BGIBMGA000177	0.37	163	2e-23	FBpp0076533	614052 mitochondrial complex v (atp synthase) deficiency, nuclear type 2; mc5dn2;
NP_055612.2	BGIBMGA001743	0.33	195	2e-23	FBpp0305244	614069 immunodeficiency-centromeric instability-facial anomalies syndrome 2; icf2;
NP_055612.2	BGIBMGA002026	0.28	115	3e-08	FBpp0304406	614069 immunodeficiency-centromeric instability-facial anomalies syndrome 2; icf2;
NP_055612.2	BGIBMGA003094	0.37	74	4e-06	FBpp0292934	614069 immunodeficiency-centromeric instability-facial anomalies syndrome 2; icf2;
NP_055612.2	BGIBMGA003834	0.3	159	6e-17	FBpp0082061	614069 immunodeficiency-centromeric instability-facial anomalies syndrome 2; icf2;
NP_055612.2	BGIBMGA006492	0.24	164	6e-07	FBpp0303073	614069 immunodeficiency-centromeric instability-facial anomalies syndrome 2; icf2;
NP_055612.2	BGIBMGA008687	0.32	117	3e-09	FBpp0112336	614069 immunodeficiency-centromeric instability-facial anomalies syndrome 2; icf2;
NP_055612.2	BGIBMGA008757	0.34	159	5e-21	FBpp0079702	614069 immunodeficiency-centromeric instability-facial anomalies syndrome 2; icf2;
NP_055612.2	BGIBMGA010321	0.34	133	2e-19	FBpp0073236	614069 immunodeficiency-centromeric instability-facial anomalies syndrome 2; icf2;
NP_055612.2	BGIBMGA013125	0.36	127	2e-18	FBpp0303261	614069 immunodeficiency-centromeric instability-facial anomalies syndrome 2; icf2;
NP_060283.3	BGIBMGA004919	0.32	257	2e-26	FBpp0084849	614078 chondrodysplasia with joint dislocations, gpapp type;
NP_060283.3	BGIBMGA011939	0.43	273	5e-56	FBpp0305522	614078 chondrodysplasia with joint dislocations, gpapp type;
NP_060283.3	BGIBMGA012458	0.23	254	3e-10	FBpp0082328	614078 chondrodysplasia with joint dislocations, gpapp type;
NP_789744.1	BGIBMGA001877	0.22	225	2e-06	FBpp0085870	614080 multiple congenital anomalies-hypotonia-seizures syndrome 1; mcahs1;
ADZ15526.1	BGIBMGA003496	0.46	346	8e-91	FBpp0087517	614080 multiple congenital anomalies-hypotonia-seizures syndrome 1; mcahs1;
ADZ15526.1	BGIBMGA004017	0.26	300	4e-08	FBpp0087978	614080 multiple congenital anomalies-hypotonia-seizures syndrome 1; mcahs1;
CAI39529.1	BGIBMGA002114	0.36	1535	0	FBpp0311281	614115 cortical malformations, occipital; occm;
AAD36991.1	BGIBMGA010816	0.42	91	4e-13	FBpp0307234	614115 cortical malformations, occipital; occm;
BAC11679.1	BGIBMGA011925	0.46	300	3e-69	FBpp0311922	614115 cortical malformations, occipital; occm;
BAD92650.1	BGIBMGA005382	0.46	1167	0	FBpp0307736	614116 neuropathy, hereditary sensory, type ie; hsn1e;
NP_001370.1	BGIBMGA005383	0.84	43	4e-16		614116 neuropathy, hereditary sensory, type ie; hsn1e;
NP_061899.1	BGIBMGA006200	0.78	178	5e-64	FBpp0080690	614132 craniofacial dysmorphism, skeletal anomalies, and mental retardation syndrome; cfsmr;
NP_005897.1	BGIBMGA013134	0.39	285	3e-54	FBpp0079641	614181 retinitis pigmentosa 62; rp62;

## Sheet: Cardiovascular
Table S1-3. Cardiovascular disease.
Accession numbers of human genes	SilkDB ID	Identity	Alignment residues amino acid length	Evalue	Drosophila melanogaster orthologs	Disorder
NP_997637.1	BGIBMGA004096	0.4	348	2e-63	FBpp0087524	101800 acrodysostosis 1, with or without hormone resistance; acrdys1; 160980 carney complex, type 1; cnc1; 255960 myxoma, intracardiac; 610489 pigmented nodular adrenocortical disease, primary, 1; ppnad1; 188550 thyroid carcinoma, papillary;
CAH18166.1	BGIBMGA008855	0.26	149	4e-06	FBpp0088350	101800 acrodysostosis 1, with or without hormone resistance; acrdys1; 160980 carney complex, type 1; cnc1; 255960 myxoma, intracardiac; 610489 pigmented nodular adrenocortical disease, primary, 1; ppnad1; 188550 thyroid carcinoma, papillary;
NP_997637.1	BGIBMGA008856	0.36	64	6e-07	FBpp0290613	101800 acrodysostosis 1, with or without hormone resistance; acrdys1; 160980 carney complex, type 1; cnc1; 255960 myxoma, intracardiac; 610489 pigmented nodular adrenocortical disease, primary, 1; ppnad1; 188550 thyroid carcinoma, papillary;
NP_997637.1	BGIBMGA011694	0.69	372	2e-142	FBpp0289762	101800 acrodysostosis 1, with or without hormone resistance; acrdys1; 160980 carney complex, type 1; cnc1; 255960 myxoma, intracardiac; 610489 pigmented nodular adrenocortical disease, primary, 1; ppnad1; 188550 thyroid carcinoma, papillary;
NP_001166031.1	BGIBMGA006675	0.43	294	7e-60	FBpp0305089	102200 pituitary adenoma, growth hormone-secreting;
NP_001166031.1	BGIBMGA008534	0.26	272	1e-19	FBpp0301972	102200 pituitary adenoma, growth hormone-secreting;
NP_001166031.1	BGIBMGA011685	0.29	121	2e-06	FBpp0083284	102200 pituitary adenoma, growth hormone-secreting;
NP_001070957.1	BGIBMGA004269	0.68	379	5e-148	FBpp0309944	102200 pituitary adenoma, growth hormone-secreting; 174800 mccune-albright syndrome; mas; 166350 osseous heteroplasia, progressive; poh; 103580 pseudohypoparathyroidism, type ia; php1a; 603233 pseudohypoparathyroidism, type ib; php1b; 612462 pseudohypoparathyroidism, type ic; php1c; 612463 pseudopseudohypoparathyroidism; pphp;
NP_001070957.1	BGIBMGA004344	0.74	379	3e-163	FBpp0309944	102200 pituitary adenoma, growth hormone-secreting; 174800 mccune-albright syndrome; mas; 166350 osseous heteroplasia, progressive; poh; 103580 pseudohypoparathyroidism, type ia; php1a; 603233 pseudohypoparathyroidism, type ib; php1b; 612462 pseudohypoparathyroidism, type ic; php1c; 612463 pseudopseudohypoparathyroidism; pphp;
NP_536351.1	BGIBMGA009786	0.45	166	2e-35	FBpp0075113	102200 pituitary adenoma, growth hormone-secreting; 174800 mccune-albright syndrome; mas; 166350 osseous heteroplasia, progressive; poh; 103580 pseudohypoparathyroidism, type ia; php1a; 603233 pseudohypoparathyroidism, type ib; php1b; 612462 pseudohypoparathyroidism, type ic; php1c; 612463 pseudopseudohypoparathyroidism; pphp;
CAI42936.1	BGIBMGA013566	0.47	148	2e-41	FBpp0309829	102200 pituitary adenoma, growth hormone-secreting; 174800 mccune-albright syndrome; mas; 166350 osseous heteroplasia, progressive; poh; 103580 pseudohypoparathyroidism, type ia; php1a; 603233 pseudohypoparathyroidism, type ib; php1b; 612462 pseudohypoparathyroidism, type ic; php1c; 612463 pseudopseudohypoparathyroidism; pphp;
AAA36372.1	BGIBMGA002937	0.49	1058	0	FBpp0310415	104300 alzheimer disease; ad; 189800 preeclampsia/eclampsia 1; pee1; 145500 hypertension, essential; 601367 stroke, ischemic;
AAA36372.1	BGIBMGA002938	0.46	1091	0	FBpp0079777	104300 alzheimer disease; ad; 189800 preeclampsia/eclampsia 1; pee1; 145500 hypertension, essential; 601367 stroke, ischemic;
NP_958816.1	BGIBMGA001091	0.48	54	9e-11	FBpp0086129	104300 alzheimer disease; ad; 605714 cerebral amyloid angiopathy, app-related;
NP_958816.1	BGIBMGA006340	0.41	71	2e-10	FBpp0086129	104300 alzheimer disease; ad; 605714 cerebral amyloid angiopathy, app-related;
NP_958817.1	BGIBMGA008317	0.45	139	1e-29	FBpp0298296	104300 alzheimer disease; ad; 605714 cerebral amyloid angiopathy, app-related;
NP_004983.1	BGIBMGA001425	0.53	62	8e-09	FBpp0081546	105830 angelman syndrome; as; 300673 encephalopathy, neonatal severe, due to mecp2 mutations; 300260 lubs x-linked mental retardation syndrome; mrxsl; 300055 mental retardation, x-linked, syndromic 13; mrxs13; 312750 rett syndrome; rtt; 300496 autism, susceptibility to, x-linked 3; autsx3;
CAA61599.1	BGIBMGA003413	0.32	87	2e-06	FBpp0082081	105830 angelman syndrome; as; 300673 encephalopathy, neonatal severe, due to mecp2 mutations; 300260 lubs x-linked mental retardation syndrome; mrxsl; 300055 mental retardation, x-linked, syndromic 13; mrxs13; 312750 rett syndrome; rtt; 300496 autism, susceptibility to, x-linked 3; autsx3;
NP_002959.2	BGIBMGA002946	0.47	193	1e-44	FBpp0088852	107480 townes-brocks syndrome; tbs;
NP_002959.2	BGIBMGA008808	0.46	57	3e-09	FBpp0297872	107480 townes-brocks syndrome; tbs;
NP_004378.1	BGIBMGA010704	0.51	94	3e-18	FBpp0083485	108900 atrial septal defect 7 with or without atrioventricular conduction defects; asd7; 225250 hypothyroidism, congenital, nongoitrous, 5; chng5; 187500 tetralogy of fallot; tof;
NP_004551.2	BGIBMGA010343	0.47	313	6e-83	FBpp0079568	113000 brachydactyly, type b1; bdb1; 268310 robinow syndrome, autosomal recessive; rrs;
NP_000337.1	BGIBMGA008274	0.25	113	6e-09	FBpp0304134	114290 campomelic dysplasia;
BAG58389.1	BGIBMGA011668	0.49	116	6e-27	FBpp0086702	114290 campomelic dysplasia;
NP_002746.1	BGIBMGA001458	0.68	381	2e-149	FBpp0071248	115150 cardiofaciocutaneous syndrome 1; cfc1;
NP_002746.1	BGIBMGA005641	0.37	316	7e-52	FBpp0073551	115150 cardiofaciocutaneous syndrome 1; cfc1;
NP_002746.1	BGIBMGA007238	0.37	321	8e-47	FBpp0306434	115150 cardiofaciocutaneous syndrome 1; cfc1;
NP_002746.1	BGIBMGA007646	0.38	295	2e-48	FBpp0303423	115150 cardiofaciocutaneous syndrome 1; cfc1;
NP_001036188.1	BGIBMGA000742	0.32	104	7e-11	FBpp0297356	117000 central core disease of muscle; 255320 minicore myopathy with external ophthalmoplegia; 145600 malignant hyperthermia, susceptibility to, 1; mhs1;
NP_904325.2	BGIBMGA000816	0.46	557	5e-126	FBpp0293213	118210 charcot-marie-tooth disease, axonal, type 2a1; cmt2a1; 171300 pheochromocytoma; 256700 neuroblastoma, susceptibility to;
NP_904325.2	BGIBMGA003619	0.55	82	1e-17	FBpp0312023	118210 charcot-marie-tooth disease, axonal, type 2a1; cmt2a1; 171300 pheochromocytoma; 256700 neuroblastoma, susceptibility to;
NP_055889.2	BGIBMGA003620	0.38	655	2e-97	FBpp0302989	118210 charcot-marie-tooth disease, axonal, type 2a1; cmt2a1; 171300 pheochromocytoma; 256700 neuroblastoma, susceptibility to;
NP_904325.2	BGIBMGA004997	0.33	127	2e-18	FBpp0293213	118210 charcot-marie-tooth disease, axonal, type 2a1; cmt2a1; 171300 pheochromocytoma; 256700 neuroblastoma, susceptibility to;
NP_904325.2	BGIBMGA005875	0.29	304	2e-22	FBpp0310067	118210 charcot-marie-tooth disease, axonal, type 2a1; cmt2a1; 171300 pheochromocytoma; 256700 neuroblastoma, susceptibility to;
AAN17742.1	BGIBMGA007234	0.41	231	2e-32	FBpp0089282	118210 charcot-marie-tooth disease, axonal, type 2a1; cmt2a1; 171300 pheochromocytoma; 256700 neuroblastoma, susceptibility to;
NP_904325.2	BGIBMGA007454	0.75	32	9e-08	FBpp0112002	118210 charcot-marie-tooth disease, axonal, type 2a1; cmt2a1; 171300 pheochromocytoma; 256700 neuroblastoma, susceptibility to;
NP_055889.2	BGIBMGA007455	0.52	488	5e-132	FBpp0086227	118210 charcot-marie-tooth disease, axonal, type 2a1; cmt2a1; 171300 pheochromocytoma; 256700 neuroblastoma, susceptibility to;
NP_055889.2	BGIBMGA007456	0.57	120	9e-36	FBpp0112002	118210 charcot-marie-tooth disease, axonal, type 2a1; cmt2a1; 171300 pheochromocytoma; 256700 neuroblastoma, susceptibility to;
NP_904325.2	BGIBMGA010931	0.39	346	6e-57	FBpp0306018	118210 charcot-marie-tooth disease, axonal, type 2a1; cmt2a1; 171300 pheochromocytoma; 256700 neuroblastoma, susceptibility to;
NP_904325.2	BGIBMGA011193	0.3	344	5e-32	FBpp0073083	118210 charcot-marie-tooth disease, axonal, type 2a1; cmt2a1; 171300 pheochromocytoma; 256700 neuroblastoma, susceptibility to;
NP_000205.1	BGIBMGA000783	0.42	681	5e-166	FBpp0310538	118450 alagille syndrome 1; algs1; 187500 tetralogy of fallot; tof;
NP_000205.1	BGIBMGA008395	0.37	265	6e-47	FBpp0073256	118450 alagille syndrome 1; algs1; 187500 tetralogy of fallot; tof;
NP_000205.1	BGIBMGA010195	0.45	385	7e-118	FBpp0293200	118450 alagille syndrome 1; algs1; 187500 tetralogy of fallot; tof;
BAG62163.1	BGIBMGA000207	0.43	480	2e-129	FBpp0304632	121050 arthrogryposis, distal, type 9; da9;
NP_001990.2	BGIBMGA000209	0.39	823	0	FBpp0288716	121050 arthrogryposis, distal, type 9; da9;
NP_001990.2	BGIBMGA006856	0.25	2613	1e-141	FBpp0304631	121050 arthrogryposis, distal, type 9; da9;
NP_001990.2	BGIBMGA010892	0.22	170	8e-06	FBpp0304632	121050 arthrogryposis, distal, type 9; da9;
NP_001990.2	BGIBMGA012379	0.36	201	3e-35	FBpp0304632	121050 arthrogryposis, distal, type 9; da9;
AAH23554.1	BGIBMGA011268	0.57	326	5e-109	FBpp0312175	121300 coproporphyria, hereditary; hcp;
NP_597677.2	BGIBMGA006830	0.41	1438	0	FBpp0290671	122470 cornelia de lange syndrome 1; cdls1;
NP_000465.1	BGIBMGA008990	0.67	97	1e-30	FBpp0311714	123100 craniosynostosis 1; crs1; 101400 saethre-chotzen syndrome; scs;
BAC86188.1	BGIBMGA004185	0.33	112	2e-08		123700 cutis laxa, autosomal dominant 1; adcl1; 185500 supravalvular aortic stenosis; svas;
NP_000426.2	BGIBMGA004843	0.39	62	4e-07	FBpp0293200	125310 cerebral arteriopathy, autosomal dominant, with subcortical infarcts and leukoencephalopathy; cadasil;
NP_000426.2	BGIBMGA007610	0.42	86	8e-15	FBpp0306945	125310 cerebral arteriopathy, autosomal dominant, with subcortical infarcts and leukoencephalopathy; cadasil;
NP_000426.2	BGIBMGA009611	0.35	316	8e-45	FBpp0303574	125310 cerebral arteriopathy, autosomal dominant, with subcortical infarcts and leukoencephalopathy; cadasil;
AAH28178.1	BGIBMGA000691	0.26	792	3e-14	FBpp0075796	130020 ehlers-danlos syndrome, type iii; 130050 ehlers-danlos syndrome, type iv, autosomal dominant;
NP_758859.1	BGIBMGA001497	0.32	233	1e-26	FBpp0297152	130650 beckwith-wiedemann syndrome; bws; 601626 leukemia, acute myeloid; aml; 117550 sotos syndrome 1; sotos1; 277590 weaver syndrome; wvs;
NP_758859.1	BGIBMGA002246	0.49	506	6e-147	FBpp0307022	130650 beckwith-wiedemann syndrome; bws; 601626 leukemia, acute myeloid; aml; 117550 sotos syndrome 1; sotos1; 277590 weaver syndrome; wvs;
AAK92049.1	BGIBMGA003106	0.39	224	1e-40	FBpp0290774	130650 beckwith-wiedemann syndrome; bws; 601626 leukemia, acute myeloid; aml; 117550 sotos syndrome 1; sotos1; 277590 weaver syndrome; wvs;
NP_074035.1	BGIBMGA000863	0.21	399	6e-11	FBpp0304867	132900 aortic aneurysm, familial thoracic 4; aat4;
NP_074035.1	BGIBMGA000915	0.21	360	8e-08	FBpp0079114	132900 aortic aneurysm, familial thoracic 4; aat4;
NP_074035.1	BGIBMGA001887	0.23	544	4e-13	FBpp0087680	132900 aortic aneurysm, familial thoracic 4; aat4;
ACB05996.1	BGIBMGA003626	0.23	500	3e-22	FBpp0298829	132900 aortic aneurysm, familial thoracic 4; aat4;
NP_074035.1	BGIBMGA005535	0.69	106	5e-39	FBpp0297531	132900 aortic aneurysm, familial thoracic 4; aat4;
NP_074035.1	BGIBMGA006225	0.23	373	1e-13	FBpp0071703	132900 aortic aneurysm, familial thoracic 4; aat4;
NP_074035.1	BGIBMGA006338	0.2	414	7e-13	FBpp0308352	132900 aortic aneurysm, familial thoracic 4; aat4;
NP_074035.1	BGIBMGA006589	0.2	1022	2e-43	FBpp0304726	132900 aortic aneurysm, familial thoracic 4; aat4;
NP_074035.1	BGIBMGA006728	0.2	861	8e-12	FBpp0310889	132900 aortic aneurysm, familial thoracic 4; aat4;
NP_074035.1	BGIBMGA007276	0.21	452	6e-07	FBpp0291661	132900 aortic aneurysm, familial thoracic 4; aat4;
AAC35212.1	BGIBMGA011210	0.38	84	1e-06	FBpp0311443	132900 aortic aneurysm, familial thoracic 4; aat4;
NP_074035.1	BGIBMGA011426	0.22	240	9e-06	FBpp0072256	132900 aortic aneurysm, familial thoracic 4; aat4;
NP_002465.1	BGIBMGA011538	0.2	896	5e-18	FBpp0304407	132900 aortic aneurysm, familial thoracic 4; aat4;
NP_074035.1	BGIBMGA011695	0.19	1093	1e-33	FBpp0304737	132900 aortic aneurysm, familial thoracic 4; aat4;
BAA36971.1	BGIBMGA011917	0.23	260	1e-09	FBpp0070954	132900 aortic aneurysm, familial thoracic 4; aat4;
Q8TEP0	BGIBMGA000535	0.28	147	1e-08	FBpp0078182	133100 erythrocytosis, familial, 1; ecyt1;
Q8TEP0	BGIBMGA003011	0.36	416	2e-54	FBpp0075538	133100 erythrocytosis, familial, 1; ecyt1;
NP_005466.1	BGIBMGA002678	0.38	86	2e-06	FBpp0076186	133100 erythrocytosis, familial, 1; ecyt1; 254450 myelofibrosis; 187950 thrombocythemia 1; thcyt1;
BAD92148.1	BGIBMGA013262	0.42	275	3e-50	FBpp0308306	133100 erythrocytosis, familial, 1; ecyt1; 254450 myelofibrosis; 187950 thrombocythemia 1; thcyt1;
NP_005624.2	BGIBMGA000696	0.25	245	1e-22	FBpp0086182	135300 fibromatosis, gingival, 1; gingf1; 610733 noonan syndrome 4; ns4;
NP_005624.2	BGIBMGA007203	0.28	280	3e-27	FBpp0080118	135300 fibromatosis, gingival, 1; gingf1; 610733 noonan syndrome 4; ns4;
NP_005624.2	BGIBMGA011102	0.39	679	3e-111	FBpp0080118	135300 fibromatosis, gingival, 1; gingf1; 610733 noonan syndrome 4; ns4;
NP_004264.2	BGIBMGA004519	0.24	342	2e-19	FBpp0309851	143095 spondyloepiphyseal dysplasia with congenital joint dislocations;
NP_001182729.1	BGIBMGA006908	0.42	119	4e-18	FBpp0305271	143890 hypercholesterolemia, familial;
AAG14967.1	BGIBMGA001018	0.26	278	2e-18		143890 hypercholesterolemia, familial;
NP_001159921.1	BGIBMGA007558	0.36	570	6e-75		143890 hypercholesterolemia, familial;
NP_001668.1	BGIBMGA006057	0.24	216	4e-08	FBpp0304645	145500 hypertension, essential;
NP_001668.1	BGIBMGA006060	0.3	212	2e-15	FBpp0304645	145500 hypertension, essential;
NP_001668.1	BGIBMGA006062	0.3	292	8e-24	FBpp0081048	145500 hypertension, essential;
NP_001668.1	BGIBMGA006063	0.29	102	7e-06	FBpp0304645	145500 hypertension, essential;
NP_001668.1	BGIBMGA006099	0.29	289	2e-23	FBpp0304645	145500 hypertension, essential;
NP_003608.1	BGIBMGA008259	0.45	108	6e-24	FBpp0309243	145500 hypertension, essential;
NP_003608.1	BGIBMGA008681	0.31	118	2e-07	FBpp0293211	145500 hypertension, essential;
NP_054909.2	BGIBMGA012159	0.39	225	4e-36	FBpp0309427	145500 hypertension, essential;
NP_002066.1	BGIBMGA000524	0.46	195	1e-50	FBpp0074717	145500 hypertension, essential;
ABM86075.1	BGIBMGA000839	0.21	284	7e-14	FBpp0311844	145500 hypertension, essential;
ABM86075.1	BGIBMGA003042	0.22	209	7e-06	FBpp0293060	145500 hypertension, essential;
NP_002066.1	BGIBMGA003947	0.23	187	1e-09	FBpp0076646	145500 hypertension, essential;
NP_002066.1	BGIBMGA004626	0.79	340	6e-162	FBpp0303987	145500 hypertension, essential;
NP_002066.1	BGIBMGA005290	0.23	179	4e-13	FBpp0071303	145500 hypertension, essential;
ABM86075.1	BGIBMGA007924	0.25	260	6e-15	FBpp0070654	145500 hypertension, essential;
ABM86075.1	BGIBMGA008225	0.24	235	4e-08	FBpp0303172	145500 hypertension, essential;
NP_002066.1	BGIBMGA008706	0.23	287	2e-11	FBpp0075582	145500 hypertension, essential;
ABM86075.1	BGIBMGA009395	0.22	183	3e-06	FBpp0070299	145500 hypertension, essential;
AAH15920.1	BGIBMGA010800	0.24	211	2e-11	FBpp0081350	145500 hypertension, essential;
ABM86075.1	BGIBMGA012449	0.25	195	5e-11	FBpp0292077	145500 hypertension, essential;
NP_002066.1	BGIBMGA012592	0.43	335	2e-83	FBpp0071137	145500 hypertension, essential;
NP_002066.1	BGIBMGA014099	0.49	35	1e-06	FBpp0074717	145500 hypertension, essential;
BAH12282.1	BGIBMGA001419	0.33	299	1e-41	FBpp0085466	145500 hypertension, essential;
BAG36549.1	BGIBMGA001573	0.3	455	1e-50	FBpp0086582	145500 hypertension, essential;
BAH12282.1	BGIBMGA002171	0.35	255	1e-36	FBpp0088127	145500 hypertension, essential;
NP_000768.1	BGIBMGA002178	0.29	390	1e-34	FBpp0087770	145500 hypertension, essential;
NP_000768.1	BGIBMGA003293	0.28	419	1e-38	FBpp0308423	145500 hypertension, essential;
BAD96728.1	BGIBMGA003908	0.27	299	2e-33	FBpp0082070	145500 hypertension, essential;
NP_000768.1	BGIBMGA003926	0.29	437	9e-52	FBpp0082070	145500 hypertension, essential;
BAH12282.1	BGIBMGA003943	0.32	464	8e-65	FBpp0082070	145500 hypertension, essential;
NP_000768.1	BGIBMGA003944	0.32	468	2e-66	FBpp0082070	145500 hypertension, essential;
BAH12282.1	BGIBMGA003945	0.31	462	1e-64	FBpp0082070	145500 hypertension, essential;
BAH12282.1	BGIBMGA003957	0.32	444	3e-58	FBpp0082070	145500 hypertension, essential;
NP_000768.1	BGIBMGA005346	0.37	239	4e-43	FBpp0086585	145500 hypertension, essential;
BAH12282.1	BGIBMGA006691	0.3	421	5e-49	FBpp0087770	145500 hypertension, essential;
BAH12282.1	BGIBMGA006785	0.31	462	5e-45	FBpp0085466	145500 hypertension, essential;
BAH12282.1	BGIBMGA007184	0.27	340	2e-28	FBpp0311631	145500 hypertension, essential;
BAG36549.1	BGIBMGA010854	0.3	464	1e-51	FBpp0085466	145500 hypertension, essential;
BAD96728.1	BGIBMGA011545	0.3	341	2e-30	FBpp0311646	145500 hypertension, essential;
BAH12282.1	BGIBMGA012089	0.34	441	5e-58	FBpp0087770	145500 hypertension, essential;
NP_000768.1	BGIBMGA012385	0.32	461	4e-58	FBpp0308423	145500 hypertension, essential;
BAH12282.1	BGIBMGA012386	0.34	339	5e-41	FBpp0308423	145500 hypertension, essential;
BAD96728.1	BGIBMGA013236	0.28	491	6e-42	FBpp0309924	145500 hypertension, essential;
BAD96728.1	BGIBMGA013237	0.28	491	2e-50	FBpp0309924	145500 hypertension, essential;
BAD96728.1	BGIBMGA013238	0.32	401	6e-50	FBpp0085466	145500 hypertension, essential;
NP_000768.1	BGIBMGA013239	0.3	430	6e-50	FBpp0087770	145500 hypertension, essential;
BAH12282.1	BGIBMGA013240	0.31	189	5e-34	FBpp0087117	145500 hypertension, essential;
BAD96728.1	BGIBMGA013241	0.31	452	6e-56	FBpp0087770	145500 hypertension, essential;
NP_114438.1	BGIBMGA005910	0.38	72	7e-08	FBpp0309550	145500 hypertension, essential; 267430 renal tubular dysgenesis; rtd;
NP_003473.3	BGIBMGA000414	0.32	109	1e-09	FBpp0307242	147920 kabuki syndrome 1; kabuk1;
AAC51735.1	BGIBMGA002502	0.31	724	9e-83	FBpp0309963	147920 kabuki syndrome 1; kabuk1;
NP_003473.3	BGIBMGA002503	0.71	147	7e-59	FBpp0070347	147920 kabuki syndrome 1; kabuk1;
NP_003473.3	BGIBMGA003897	0.38	64	9e-08	FBpp0085204	147920 kabuki syndrome 1; kabuk1;
NP_003473.3	BGIBMGA004352	0.54	54	7e-16	FBpp0307242	147920 kabuki syndrome 1; kabuk1;
NP_003473.3	BGIBMGA005421	0.3	222	9e-07	FBpp0305773	147920 kabuki syndrome 1; kabuk1;
NP_003473.3	BGIBMGA007859	0.35	173	3e-10	FBpp0307021	147920 kabuki syndrome 1; kabuk1;
NP_003473.3	BGIBMGA008253	0.29	163	1e-08	FBpp0073569	147920 kabuki syndrome 1; kabuk1;
NP_060405.4	BGIBMGA010568	0.28	158	1e-07	FBpp0306972	152700 systemic lupus erythematosus; sle;
NP_005242.1	BGIBMGA013330	0.82	123	7e-57	FBpp0078049	153400 lymphedema-distichiasis syndrome;
NP_476508.2	BGIBMGA001246	0.5	52	4e-10	FBpp0086129	158810 bethlem myopathy; 254090 ullrich congenital muscular dystrophy; ucmd;
NP_001075031.1	BGIBMGA003038	0.44	396	1e-93	FBpp0309137	160900 myotonic dystrophy 1; dm1;
AAH26328.1	BGIBMGA006330	0.39	320	3e-67	FBpp0085082	160900 myotonic dystrophy 1; dm1;
AAB31800.1	BGIBMGA008122	0.47	506	5e-130	FBpp0072194	160900 myotonic dystrophy 1; dm1;
NP_001075031.1	BGIBMGA012856	0.35	347	3e-47	FBpp0075702	160900 myotonic dystrophy 1; dm1;
AAP37280.1	BGIBMGA005577	0.86	254	9e-131	FBpp0085365	161800 nemaline myopathy 3; nem3; 255310 myopathy, congenital, with fiber-type disproportion; cftd;
NP_005564.1	BGIBMGA003652	0.39	516	2e-81	FBpp0312110	169500 leukodystrophy, demyelinating, adult-onset, autosomal dominant; adld;
NP_002734.2	BGIBMGA006523	0.44	200	3e-46	FBpp0296964	174050 polycystic liver disease; pcld;
NP_009145.1	BGIBMGA006824	0.43	60	2e-07	FBpp0086340	174050 polycystic liver disease; pcld;
NP_009145.1	BGIBMGA007808	0.35	71	4e-06	FBpp0078147	174050 polycystic liver disease; pcld;
NP_009145.1	BGIBMGA008111	0.42	60	3e-07	FBpp0083849	174050 polycystic liver disease; pcld;
NP_009145.1	BGIBMGA009209	0.32	73	5e-06	FBpp0088954	174050 polycystic liver disease; pcld;
NP_009145.1	BGIBMGA009967	0.5	483	6e-132	FBpp0076558	174050 polycystic liver disease; pcld;
NP_009145.1	BGIBMGA013536	0.43	57	4e-07	FBpp0297900	174050 polycystic liver disease; pcld;
NP_002734.2	BGIBMGA013633	0.49	89	2e-21	FBpp0083050	174050 polycystic liver disease; pcld;
NP_009145.1	BGIBMGA014455	0.41	65	6e-06	FBpp0082332	174050 polycystic liver disease; pcld;
NP_005350.1	BGIBMGA010110	0.72	283	6e-98	FBpp0307959	175050 juvenile polyposis/hereditary hemorrhagic telangiectasia syndrome; jpht; 174900 juvenile polyposis syndrome; jps;
NP_000159.3	BGIBMGA004545	0.8	176	8e-85	FBpp0297298	175700 greig cephalopolysyndactyly syndrome; gcps; 146510 pallister-hall syndrome; phs; 174200 polydactyly, postaxial, type a1; papa1; 174700 polydactyly, preaxial iv; 241800 hypothalamic hamartomas;
NP_000159.3	BGIBMGA005001	0.41	68	8e-07	FBpp0311930	175700 greig cephalopolysyndactyly syndrome; gcps; 146510 pallister-hall syndrome; phs; 174200 polydactyly, postaxial, type a1; papa1; 174700 polydactyly, preaxial iv; 241800 hypothalamic hamartomas;
NP_000159.3	BGIBMGA013124	0.44	73	8e-10	FBpp0291128	175700 greig cephalopolysyndactyly syndrome; gcps; 146510 pallister-hall syndrome; phs; 174200 polydactyly, postaxial, type a1; papa1; 174700 polydactyly, preaxial iv; 241800 hypothalamic hamartomas;
NP_001019553.1	BGIBMGA000119	0.44	337	2e-82	FBpp0072572	176000 porphyria, acute intermittent;
NP_001116236.1	BGIBMGA002540	0.34	296	8e-44	FBpp0084044	176200 porphyria variegata;
AAA60165.1	BGIBMGA003105	0.25	199	5e-06	FBpp0077481	176860 thrombophilia due to protein c deficiency, autosomal dominant; thph3; 612304 thrombophilia due to protein c deficiency, autosomal recessive; thph4;
Q8IXB4	BGIBMGA006747	0.23	122	4e-07	FBpp0083021	176860 thrombophilia due to protein c deficiency, autosomal dominant; thph3; 612304 thrombophilia due to protein c deficiency, autosomal recessive; thph4;
NP_000303.1	BGIBMGA007365	0.24	232	4e-08	FBpp0080557	176860 thrombophilia due to protein c deficiency, autosomal dominant; thph3; 612304 thrombophilia due to protein c deficiency, autosomal recessive; thph4;
NP_000303.1	BGIBMGA009528	0.26	247	6e-11	FBpp0076748	176860 thrombophilia due to protein c deficiency, autosomal dominant; thph3; 612304 thrombophilia due to protein c deficiency, autosomal recessive; thph4;
NP_000303.1	BGIBMGA011362	0.33	120	3e-13	FBpp0085397	176860 thrombophilia due to protein c deficiency, autosomal dominant; thph3; 612304 thrombophilia due to protein c deficiency, autosomal recessive; thph4;
NP_000303.1	BGIBMGA013051	0.26	240	7e-17	FBpp0082362	176860 thrombophilia due to protein c deficiency, autosomal dominant; thph3; 612304 thrombophilia due to protein c deficiency, autosomal recessive; thph4;
NP_002449.2	BGIBMGA000205	0.26	619	2e-22	FBpp0073728	178500 pulmonary fibrosis, idiopathic; ipf;
NP_002449.2	BGIBMGA009933	0.23	518	4e-14	FBpp0084219	178500 pulmonary fibrosis, idiopathic; ipf;
NP_002449.2	BGIBMGA013343	0.24	441	7e-07	FBpp0077487	178500 pulmonary fibrosis, idiopathic; ipf;
NP_005896.1	BGIBMGA010481	0.78	418	0	FBpp0304648	178600 pulmonary hypertension, primary, 1; pph1;
NP_001195.2	BGIBMGA009697	0.38	291	2e-29	FBpp0303105	178600 pulmonary hypertension, primary, 1; pph1; 265450 pulmonary venoocclusive disease; pvod;
NP_003383.2	BGIBMGA013783	0.58	180	2e-52	FBpp0309792	180700 robinow syndrome, autosomal dominant; drs;
NP_003383.2	BGIBMGA013982	0.59	41	7e-13	FBpp0308474	180700 robinow syndrome, autosomal dominant; drs;
NP_004371.2	BGIBMGA000853	0.67	829	0	FBpp0305701	180849 rubinstein-taybi syndrome 1; rsts1;
EAW85334.1	BGIBMGA001666	0.28	119	3e-06	FBpp0084763	180849 rubinstein-taybi syndrome 1; rsts1;
NP_057653.3	BGIBMGA006719	0.59	74	4e-13	FBpp0303938	181450 ulnar-mammary syndrome; ums;
BAG65418.1	BGIBMGA012897	0.94	54	5e-26	FBpp0301040	181450 ulnar-mammary syndrome; ums;
AAF61207.1	BGIBMGA012898	0.81	83	4e-33	FBpp0289836	181450 ulnar-mammary syndrome; ums;
NP_001142.2	BGIBMGA002005	0.76	292	8e-119	FBpp0312078	192600 cardiomyopathy, familial hypertrophic, 1; cmh1; 609283 progressive external ophthalmoplegia with mitochondrial dna deletions, autosomal dominant, 2; peoa2;
NP_001142.2	BGIBMGA003829	0.82	252	6e-112	FBpp0312078	192600 cardiomyopathy, familial hypertrophic, 1; cmh1; 609283 progressive external ophthalmoplegia with mitochondrial dna deletions, autosomal dominant, 2; peoa2;
NP_940927.2	BGIBMGA005777	0.36	316	3e-44	FBpp0312027	200990 acrocallosal syndrome; acls; 614120 hydrolethalus syndrome 2; hls2;
NP_940927.2	BGIBMGA009884	0.38	326	1e-51	FBpp0297760	200990 acrocallosal syndrome; acls; 614120 hydrolethalus syndrome 2; hls2;
NP_940927.2	BGIBMGA010383	0.25	344	5e-20	FBpp0307854	200990 acrocallosal syndrome; acls; 614120 hydrolethalus syndrome 2; hls2;
NP_899050.1	BGIBMGA001823	0.28	110	5e-06	FBpp0086009	201000 carpenter syndrome 1; crpt1;
NP_899050.1	BGIBMGA012644	0.7	124	5e-41	FBpp0078376	201000 carpenter syndrome 1; crpt1;
NP_899050.1	BGIBMGA014349	0.77	52	3e-13	FBpp0078376	201000 carpenter syndrome 1; crpt1;
NP_998820.3	BGIBMGA006676	0.34	243	1e-30	FBpp0078371	201300 neuropathy, hereditary sensory and autonomic, type iia; hsan2a; 145260 pseudohypoaldosteronism, type iia; pha2a;
NP_998820.3	BGIBMGA013415	0.62	362	2e-131	FBpp0311154	201300 neuropathy, hereditary sensory and autonomic, type iia; hsan2a; 145260 pseudohypoaldosteronism, type iia; pha2a;
NP_000008.1	BGIBMGA006977	0.49	327	2e-78	FBpp0083227	201470 acyl-coa dehydrogenase, short-chain, deficiency of; acadsd;
NP_000008.1	BGIBMGA013140	0.71	396	5e-146	FBpp0083227	201470 acyl-coa dehydrogenase, short-chain, deficiency of; acadsd;
BAG57027.1	BGIBMGA014417	0.63	227	1e-74	FBpp0311550	201475 acyl-coa dehydrogenase, very long-chain, deficiency of; acadvld;
NP_722540.1	BGIBMGA002862	0.38	50	1e-06	FBpp0073974	202370 peroxisome biogenesis disorder 2b; pbd2b; 214100 peroxisome biogenesis disorder 1a (zellweger); pbd1a;
CAG46874.1	BGIBMGA004381	0.28	325	2e-20	FBpp0305589	202370 peroxisome biogenesis disorder 2b; pbd2b; 214100 peroxisome biogenesis disorder 1a (zellweger); pbd1a;
NP_002609.1	BGIBMGA004502	0.4	245	2e-43	FBpp0086874	202370 peroxisome biogenesis disorder 2b; pbd2b; 214100 peroxisome biogenesis disorder 1a (zellweger); pbd1a;
EAW88673.1	BGIBMGA006608	0.33	624	2e-74	FBpp0070352	202370 peroxisome biogenesis disorder 2b; pbd2b; 214100 peroxisome biogenesis disorder 1a (zellweger); pbd1a;
NP_000457.1	BGIBMGA003775	0.3	135	5e-09		202370 peroxisome biogenesis disorder 2b; pbd2b; 266510 peroxisome biogenesis disorder 3b; pbd3b; 214100 peroxisome biogenesis disorder 1a (zellweger); pbd1a;
NP_000457.1	BGIBMGA003776	0.4	407	2e-63	FBpp0075519	202370 peroxisome biogenesis disorder 2b; pbd2b; 266510 peroxisome biogenesis disorder 3b; pbd3b; 214100 peroxisome biogenesis disorder 1a (zellweger); pbd1a;
NP_000186.2	BGIBMGA011478	0.49	42	3e-07	FBpp0086579	203300 hermansky-pudlak syndrome 1; hps1;
NP_009034.2	BGIBMGA006011	0.86	365	0	FBpp0309828	203450 alexander disease; 256000 leigh syndrome; ls; 252010 mitochondrial complex i deficiency;
NP_009034.2	BGIBMGA006013	0.84	447	0	FBpp0309828	203450 alexander disease; 256000 leigh syndrome; ls; 252010 mitochondrial complex i deficiency;
CAA99340.1	BGIBMGA007324	0.69	439	0	FBpp0079790	203500 alkaptonuria;
NP_002684.1	BGIBMGA009359	0.4	1124	0	FBpp0080148	203700 mitochondrial dna depletion syndrome 4a (alpers type); mtdps4a; 613662 mitochondrial dna depletion syndrome 4b (mngie type); mtdps4b; 607459 sensory ataxic neuropathy, dysarthria, and ophthalmoparesis; sando; 157640 progressive external ophthalmoplegia with mitochondrial dna deletions, autosomal dominant, 1; peoa1; 258450 progressive external ophthalmoplegia with mitochondrial dna deletion…
NP_003097.1	BGIBMGA003077	0.81	54	6e-19	FBpp0303211	206900 microphthalmia, syndromic 3; mcops3;
NP_003097.1	BGIBMGA003078	0.73	81	6e-30	FBpp0303149	206900 microphthalmia, syndromic 3; mcops3;
NP_003097.1	BGIBMGA003079	0.67	97	5e-30	FBpp0305250	206900 microphthalmia, syndromic 3; mcops3;
NP_003097.1	BGIBMGA003080	0.77	43	5e-14	FBpp0303149	206900 microphthalmia, syndromic 3; mcops3;
NP_003097.1	BGIBMGA003081	0.8	53	2e-19	FBpp0303149	206900 microphthalmia, syndromic 3; mcops3;
NP_003097.1	BGIBMGA006156	0.45	151	2e-23	FBpp0303243	206900 microphthalmia, syndromic 3; mcops3;
NP_071420.1	BGIBMGA005119	0.38	71	2e-08	FBpp0084572	206920 microphthalmia with limb anomalies;
NP_110404.1	BGIBMGA003460	0.34	85	1e-07	FBpp0087179	208050 arterial tortuosity syndrome; ats;
NP_110404.1	BGIBMGA004484	0.26	105	1e-09	FBpp0086060	208050 arterial tortuosity syndrome; ats;
BAG37684.1	BGIBMGA004623	0.27	103	3e-06	FBpp0087179	208050 arterial tortuosity syndrome; ats;
NP_110404.1	BGIBMGA010162	0.27	84	1e-07	FBpp0307732	208050 arterial tortuosity syndrome; ats;
NP_061138.3	BGIBMGA007200	0.28	263	5e-25	FBpp0084210	208085 arthrogryposis, renal dysfunction, and cholestasis 1; arcs1;
NP_061138.3	BGIBMGA008046	0.32	424	1e-55	FBpp0303585	208085 arthrogryposis, renal dysfunction, and cholestasis 1; arcs1;
AAH16445.1	BGIBMGA012868	0.31	109	2e-08	FBpp0303585	208085 arthrogryposis, renal dysfunction, and cholestasis 1; arcs1;
NP_005798.2	BGIBMGA000421	0.29	125	8e-06	FBpp0306640	208250 camptodactyly-arthropathy-coxa vara-pericarditis syndrome; cacp;
BAD18580.1	BGIBMGA000532	0.23	275	1e-06	FBpp0305261	208250 camptodactyly-arthropathy-coxa vara-pericarditis syndrome; cacp;
BAD18580.1	BGIBMGA001470	0.21	547	2e-07	FBpp0307636	208250 camptodactyly-arthropathy-coxa vara-pericarditis syndrome; cacp;
BAG62891.1	BGIBMGA001611	0.26	202	1e-07	FBpp0294050	208250 camptodactyly-arthropathy-coxa vara-pericarditis syndrome; cacp;
NP_005798.2	BGIBMGA003411	0.23	660	7e-11	FBpp0075850	208250 camptodactyly-arthropathy-coxa vara-pericarditis syndrome; cacp;
NP_005798.2	BGIBMGA009443	0.27	313	7e-16	FBpp0077849	208250 camptodactyly-arthropathy-coxa vara-pericarditis syndrome; cacp;
NP_005798.2	BGIBMGA009828	0.21	816	5e-26	FBpp0307658	208250 camptodactyly-arthropathy-coxa vara-pericarditis syndrome; cacp;
NP_005798.2	BGIBMGA011094	0.25	185	6e-06	FBpp0310843	208250 camptodactyly-arthropathy-coxa vara-pericarditis syndrome; cacp;
NP_005798.2	BGIBMGA012362	0.22	523	3e-12	FBpp0077084	208250 camptodactyly-arthropathy-coxa vara-pericarditis syndrome; cacp;
BAG62891.1	BGIBMGA013884	0.33	132	7e-10	FBpp0071462	208250 camptodactyly-arthropathy-coxa vara-pericarditis syndrome; cacp;
CAA39288.1	BGIBMGA000866	0.52	249	8e-60	FBpp0308484	208400 aspartylglucosaminuria; agu;
CAA39288.1	BGIBMGA007025	0.29	305	6e-28	FBpp0308748	208400 aspartylglucosaminuria; agu;
NP_778243.1	BGIBMGA009704	0.34	87	3e-06	FBpp0307127	208920 ataxia, early-onset, with oculomotor apraxia and hypoalbuminemia; eaoh; 607426 coenzyme q10 deficiency, primary, 1; coq10d1;
NP_778243.1	BGIBMGA011667	0.37	157	3e-26	FBpp0083174	208920 ataxia, early-onset, with oculomotor apraxia and hypoalbuminemia; eaoh; 607426 coenzyme q10 deficiency, primary, 1; coq10d1;
NP_778243.1	BGIBMGA011899	0.32	86	2e-06	FBpp0099426	208920 ataxia, early-onset, with oculomotor apraxia and hypoalbuminemia; eaoh; 607426 coenzyme q10 deficiency, primary, 1; coq10d1;
BAG64724.1	BGIBMGA000826	0.29	390	2e-33	FBpp0075698	209300 atransferrinemia;
ABI97197.1	BGIBMGA011424	0.28	554	2e-39	FBpp0312205	209300 atransferrinemia;
BAD96475.1	BGIBMGA012221	0.27	320	1e-15	FBpp0086274	209300 atransferrinemia;
NP_078925.3	BGIBMGA002903	0.34	221	4e-32	FBpp0076621	209900 bardet-biedl syndrome; bbs;
NP_078925.3	BGIBMGA002904	0.39	196	5e-23	FBpp0076621	209900 bardet-biedl syndrome; bbs;
BAF82293.1	BGIBMGA002764	0.42	481	9e-94		209900 bardet-biedl syndrome; bbs;
NP_114091.3	BGIBMGA002765	0.37	68	5e-08		209900 bardet-biedl syndrome; bbs;
BAG61027.1	BGIBMGA006705	0.22	333	1e-07	FBpp0074918	209900 bardet-biedl syndrome; bbs;
ABM85635.1	BGIBMGA011069	0.22	344	2e-09	FBpp0072562	209900 bardet-biedl syndrome; bbs;
NP_689597.1	BGIBMGA008712	0.5	336	1e-92	FBpp0078512	209900 bardet-biedl syndrome; bbs;
ABM87809.1	BGIBMGA000949	0.26	208	6e-15		209900 bardet-biedl syndrome; bbs;
NP_940820.1	BGIBMGA006911	0.3	400	3e-45	FBpp0289682	209900 bardet-biedl syndrome; bbs;
NP_071881.1	BGIBMGA000472	0.31	349	9e-41	FBpp0084089	210250 sitosterolemia;
NP_071881.1	BGIBMGA002712	0.31	231	2e-23	FBpp0075149	210250 sitosterolemia;
NP_071881.1	BGIBMGA005203	0.27	446	2e-33	FBpp0099713	210250 sitosterolemia;
NP_071881.1	BGIBMGA005226	0.25	559	3e-40	FBpp0311684	210250 sitosterolemia;
AAH65937.1	BGIBMGA010290	0.34	439	3e-68	FBpp0288787	211800 calcification of joints and arteries; calja;
AAH65937.1	BGIBMGA010291	0.37	507	5e-87	FBpp0288787	211800 calcification of joints and arteries; calja;
AAH65937.1	BGIBMGA012871	0.33	523	7e-83	FBpp0288787	211800 calcification of joints and arteries; calja;
NP_002517.1	BGIBMGA012947	0.29	169	1e-10	FBpp0288787	211800 calcification of joints and arteries; calja;
NP_002517.1	BGIBMGA012948	0.32	495	6e-63	FBpp0304658	211800 calcification of joints and arteries; calja;
AAH65937.1	BGIBMGA014049	0.37	423	1e-74	FBpp0309184	211800 calcification of joints and arteries; calja;
NP_002517.1	BGIBMGA014139	0.25	484	8e-32	FBpp0308547	211800 calcification of joints and arteries; calja;
AAH65937.1	BGIBMGA014198	0.33	507	2e-62	FBpp0304658	211800 calcification of joints and arteries; calja;
CAA63371.1	BGIBMGA010523	0.38	500	9e-85	FBpp0311917	211900 tumoral calcinosis, hyperphosphatemic, familial; hftc;
NP_004473.2	BGIBMGA014556	0.4	265	3e-47	FBpp0292961	211900 tumoral calcinosis, hyperphosphatemic, familial; hftc;
NP_000294.1	BGIBMGA005687	0.54	237	1e-73	FBpp0075693	212065 congenital disorder of glycosylation, type ia; cdg1a;
BAG52082.1	BGIBMGA001608	0.4	324	8e-85	FBpp0306759	212066 congenital disorder of glycosylation, type iia; cdg2a;
NP_003051.1	BGIBMGA001306	0.28	330	3e-29	FBpp0309574	212140 carnitine deficiency, systemic primary; cdsp;
NP_003051.1	BGIBMGA001498	0.26	152	4e-11	FBpp0309234	212140 carnitine deficiency, systemic primary; cdsp;
NP_003051.1	BGIBMGA001599	0.32	428	3e-54	FBpp0078128	212140 carnitine deficiency, systemic primary; cdsp;
ABM86744.1	BGIBMGA002525	0.25	521	3e-39	FBpp0288885	212140 carnitine deficiency, systemic primary; cdsp;
NP_003051.1	BGIBMGA002970	0.3	521	6e-70	FBpp0307149	212140 carnitine deficiency, systemic primary; cdsp;
ABM86744.1	BGIBMGA003437	0.25	517	6e-47	FBpp0288885	212140 carnitine deficiency, systemic primary; cdsp;
NP_003051.1	BGIBMGA005437	0.25	171	5e-06	FBpp0088552	212140 carnitine deficiency, systemic primary; cdsp;
NP_003051.1	BGIBMGA007999	0.29	97	2e-06	FBpp0309574	212140 carnitine deficiency, systemic primary; cdsp;
NP_003051.1	BGIBMGA008659	0.34	186	3e-27	FBpp0309574	212140 carnitine deficiency, systemic primary; cdsp;
NP_003051.1	BGIBMGA009055	0.26	327	3e-26	FBpp0078128	212140 carnitine deficiency, systemic primary; cdsp;
NP_003051.1	BGIBMGA009185	0.27	465	7e-33	FBpp0078128	212140 carnitine deficiency, systemic primary; cdsp;
NP_003051.1	BGIBMGA009193	0.29	395	5e-30	FBpp0078128	212140 carnitine deficiency, systemic primary; cdsp;
ABM86744.1	BGIBMGA009197	0.25	519	2e-30	FBpp0078128	212140 carnitine deficiency, systemic primary; cdsp;
NP_003051.1	BGIBMGA009199	0.32	335	8e-42	FBpp0078124	212140 carnitine deficiency, systemic primary; cdsp;
NP_003051.1	BGIBMGA009200	0.25	353	9e-39	FBpp0078128	212140 carnitine deficiency, systemic primary; cdsp;
NP_003051.1	BGIBMGA011012	0.3	490	8e-56	FBpp0082730	212140 carnitine deficiency, systemic primary; cdsp;
NP_003051.1	BGIBMGA011016	0.32	411	6e-64	FBpp0309574	212140 carnitine deficiency, systemic primary; cdsp;
ABM86744.1	BGIBMGA011017	0.3	416	9e-57	FBpp0309574	212140 carnitine deficiency, systemic primary; cdsp;
NP_003051.1	BGIBMGA011021	0.28	360	1e-32	FBpp0309574	212140 carnitine deficiency, systemic primary; cdsp;
ABM86744.1	BGIBMGA011090	0.32	425	3e-55	FBpp0309574	212140 carnitine deficiency, systemic primary; cdsp;
NP_003051.1	BGIBMGA011093	0.31	489	4e-45	FBpp0112387	212140 carnitine deficiency, systemic primary; cdsp;
ABM86744.1	BGIBMGA011225	0.29	428	8e-46	FBpp0288885	212140 carnitine deficiency, systemic primary; cdsp;
ABM86744.1	BGIBMGA011226	0.27	521	1e-44	FBpp0288885	212140 carnitine deficiency, systemic primary; cdsp;
NP_003051.1	BGIBMGA011879	0.33	520	7e-68	FBpp0086928	212140 carnitine deficiency, systemic primary; cdsp;
NP_003051.1	BGIBMGA012587	0.27	389	8e-34	FBpp0078124	212140 carnitine deficiency, systemic primary; cdsp;
NP_003051.1	BGIBMGA013435	0.21	332	1e-06	FBpp0111892	212140 carnitine deficiency, systemic primary; cdsp;
NP_003051.1	BGIBMGA013585	0.27	152	2e-09	FBpp0111892	212140 carnitine deficiency, systemic primary; cdsp;
NP_003051.1	BGIBMGA013642	0.22	383	1e-07	FBpp0290244	212140 carnitine deficiency, systemic primary; cdsp;
ABM86744.1	BGIBMGA013688	0.35	194	7e-28	FBpp0086928	212140 carnitine deficiency, systemic primary; cdsp;
NP_003051.1	BGIBMGA013710	0.29	386	4e-45	FBpp0078124	212140 carnitine deficiency, systemic primary; cdsp;
NP_003051.1	BGIBMGA013711	0.32	308	2e-39	FBpp0078128	212140 carnitine deficiency, systemic primary; cdsp;
BAG51330.1	BGIBMGA010665	0.24	519	1e-34	FBpp0079886	212720 martsolf syndrome;
NP_000775.1	BGIBMGA000368	0.26	469	4e-37	FBpp0073061	213700 cerebrotendinous xanthomatosis; ctx;
AAO21126.1	BGIBMGA001276	0.28	383	6e-39	FBpp0083144	213700 cerebrotendinous xanthomatosis; ctx;
NP_000775.1	BGIBMGA004097	0.36	170	5e-28	FBpp0293134	213700 cerebrotendinous xanthomatosis; ctx;
NP_001180573.1	BGIBMGA011144	0.35	207	2e-27	FBpp0309544	214100 peroxisome biogenesis disorder 1a (zellweger); pbd1a;
NP_004556.1	BGIBMGA014129	0.26	218	8e-12	FBpp0077909	214100 peroxisome biogenesis disorder 1a (zellweger); pbd1a;
NP_003621.1	BGIBMGA010225	0.32	366	2e-49	FBpp0304214	214100 peroxisome biogenesis disorder 1a (zellweger); pbd1a;
NP_036563.1	BGIBMGA003697	0.3	508	3e-58	FBpp0291371	214800 charge syndrome;
NP_036563.1	BGIBMGA004093	0.3	465	1e-57	FBpp0292882	214800 charge syndrome;
NP_036563.1	BGIBMGA008511	0.37	231	3e-35	FBpp0311494	214800 charge syndrome;
NP_036563.1	BGIBMGA008512	0.26	164	1e-05	FBpp0311494	214800 charge syndrome;
NP_036563.1	BGIBMGA010124	0.33	434	5e-50	FBpp0289568	214800 charge syndrome;
BAD96554.1	BGIBMGA011439	0.28	338	5e-35	FBpp0071630	215140 hydrops-ectopic calcification-moth-eaten skeletal dysplasia; 169400 pelger-huet anomaly; pha; 613471 reynolds syndrome;
NP_000073.1	BGIBMGA010495	0.22	222	8e-07	FBpp0087402	216400 cockayne syndrome a; csa;
NP_858047.2	BGIBMGA003852	0.47	188	5e-43	FBpp0290049	216550 cohen syndrome; coh1;
AAH60513.1	BGIBMGA000385	0.39	189	2e-27	FBpp0312168	217090 plasminogen deficiency, type i;
NP_000292.1	BGIBMGA009694	0.35	242	5e-36	FBpp0087747	217090 plasminogen deficiency, type i;
AAH60513.1	BGIBMGA014407	0.37	203	7e-24	FBpp0311172	217090 plasminogen deficiency, type i;
NP_542378.1	BGIBMGA013132	0.72	197	3e-81	FBpp0311870	217095 conotruncal heart malformations; cthm; 188400 digeorge syndrome; dgs; 192430 velocardiofacial syndrome;
NP_789765.1	BGIBMGA003980	0.57	120	1e-35	FBpp0289803	218040 costello syndrome; 109800 bladder cancer; 188470 thyroid carcinoma, follicular; ftc;
NP_005334.1	BGIBMGA009918	0.55	166	2e-49	FBpp0070559	218040 costello syndrome; 109800 bladder cancer; 188470 thyroid carcinoma, follicular; ftc;
NP_789765.1	BGIBMGA012832	0.27	109	6e-06	FBpp0306785	218040 costello syndrome; 109800 bladder cancer; 188470 thyroid carcinoma, follicular; ftc;
NP_060732.2	BGIBMGA000477	0.44	386	3e-92	FBpp0311288	218330 cranioectodermal dysplasia 1; ced1;
BAA91888.1	BGIBMGA000478	0.36	530	2e-97	FBpp0311288	218330 cranioectodermal dysplasia 1; ced1;
NP_004251.3	BGIBMGA008914	0.21	349	2e-11	FBpp0073828	218600 baller-gerold syndrome; bgs; 266280 rapadilino syndrome; 268400 rothmund-thomson syndrome; rts;
NP_004251.3	BGIBMGA009903	0.28	125	7e-06	FBpp0076003	218600 baller-gerold syndrome; bgs; 266280 rapadilino syndrome; 268400 rothmund-thomson syndrome; rts;
NP_004251.3	BGIBMGA010259	0.23	369	4e-10	FBpp0112117	218600 baller-gerold syndrome; bgs; 266280 rapadilino syndrome; 268400 rothmund-thomson syndrome; rts;
EAW82071.1	BGIBMGA011784	0.35	537	3e-95	FBpp0076452	218600 baller-gerold syndrome; bgs; 266280 rapadilino syndrome; 268400 rothmund-thomson syndrome; rts;
NP_001854.1	BGIBMGA004650	0.4	77	3e-16	FBpp0300889	220110 mitochondrial complex iv deficiency;
NP_004516.2	BGIBMGA003646	0.39	98	5e-16	FBpp0307459	222448 donnai-barrow syndrome;
NP_004516.2	BGIBMGA006213	0.29	115	4e-07	FBpp0305995	222448 donnai-barrow syndrome;
NP_004516.2	BGIBMGA006214	0.25	209	4e-09	FBpp0291540	222448 donnai-barrow syndrome;
AAB41649.1	BGIBMGA011982	0.38	4344	0	FBpp0310028	222448 donnai-barrow syndrome;
NP_004516.2	BGIBMGA012239	0.3	122	1e-13	FBpp0309662	222448 donnai-barrow syndrome;
NP_004516.2	BGIBMGA014163	0.32	294	9e-37	FBpp0073715	222448 donnai-barrow syndrome;
NP_000778.3	BGIBMGA002587	0.27	259	3e-13	FBpp0072112	223360 dopamine beta-hydroxylase deficiency, congenital;
NP_000778.3	BGIBMGA005287	0.42	234	8e-46	FBpp0309355	223360 dopamine beta-hydroxylase deficiency, congenital;
NP_000778.3	BGIBMGA014548	0.37	176	2e-30	FBpp0305776	223360 dopamine beta-hydroxylase deficiency, congenital;
AAC64258.1	BGIBMGA001538	0.31	493	2e-61	FBpp0307425	223900 neuropathy, hereditary sensory and autonomic, type iii; hsan3;
NP_338599.1	BGIBMGA000125	0.36	157	2e-16	FBpp0310346	225750 aicardi-goutieres syndrome 1; ags1; 610448 chilblain lupus 1; chbl1; 192315 vasculopathy, retinal, with cerebral leukodystrophy; rvcl; 152700 systemic lupus erythematosus; sle;
NP_338599.1	BGIBMGA013676	0.25	222	9e-17	FBpp0310346	225750 aicardi-goutieres syndrome 1; ags1; 610448 chilblain lupus 1; chbl1; 192315 vasculopathy, retinal, with cerebral leukodystrophy; rvcl; 152700 systemic lupus erythematosus; sle;
AAB59532.1	BGIBMGA006846	0.25	393	1e-10	FBpp0296948	227400 factor v deficiency; 600880 budd-chiari syndrome; bdchs; 601367 stroke, ischemic; 188055 thrombophilia due to activated protein c resistance; thph2;
NP_000135.2	BGIBMGA008044	0.54	107	4e-26	FBpp0071283	229300 friedreich ataxia 1; frda;
NP_001121100.1	BGIBMGA001399	0.66	329	4e-121	FBpp0310401	229700 fructose-1,6-bisphosphatase deficiency;
NP_000138.2	BGIBMGA006905	0.52	428	7e-138	FBpp0100046	230000 fucosidosis;
BAD96811.1	BGIBMGA006815	0.42	601	8e-124	FBpp0081961	230500 gm1-gangliosidosis, type i; 230600 gm1-gangliosidosis, type ii; 230650 gm1-gangliosidosis, type iii; 253010 mucopolysaccharidosis type ivb;
Q16836.3	BGIBMGA000419	0.26	212	8e-13	FBpp0311907	231530 3-hydroxyacyl-coa dehydrogenase deficiency; 609975 hyperinsulinemic hypoglycemia, familial, 4; hhf4;
NP_005318.3	BGIBMGA007360	0.53	311	2e-89	FBpp0079454	231530 3-hydroxyacyl-coa dehydrogenase deficiency; 609975 hyperinsulinemic hypoglycemia, familial, 4; hhf4;
NP_005318.3	BGIBMGA007361	0.61	77	6e-20		231530 3-hydroxyacyl-coa dehydrogenase deficiency; 609975 hyperinsulinemic hypoglycemia, familial, 4; hhf4;
NP_005318.3	BGIBMGA007408	0.58	139	7e-39	FBpp0079454	231530 3-hydroxyacyl-coa dehydrogenase deficiency; 609975 hyperinsulinemic hypoglycemia, familial, 4; hhf4;
NP_005318.3	BGIBMGA007409	0.67	150	3e-57	FBpp0079454	231530 3-hydroxyacyl-coa dehydrogenase deficiency; 609975 hyperinsulinemic hypoglycemia, familial, 4; hhf4;
NP_056480.1	BGIBMGA007431	0.33	441	1e-69	FBpp0071254	231550 achalasia-addisonianism-alacrima syndrome; aaas;
ADR83154.1	BGIBMGA009712	0.29	178	3e-11	FBpp0111930	232200 glycogen storage disease ia;
NP_001458.1	BGIBMGA011231	0.29	148	2e-09	FBpp0309685	232220 glycogen storage disease ib; 232240 glycogen storage disease ic;
ABI53718.1	BGIBMGA000132	0.33	583	4e-78	FBpp0070058	232300 glycogen storage disease ii;
NP_001073272.1	BGIBMGA001568	0.22	278	7e-07		232300 glycogen storage disease ii;
NP_001073272.1	BGIBMGA007153	0.25	421	5e-16	FBpp0084221	232300 glycogen storage disease ii;
ABI53718.1	BGIBMGA007199	0.23	400	2e-12	FBpp0084221	232300 glycogen storage disease ii;
NP_001073272.1	BGIBMGA012077	0.4	868	0	FBpp0070058	232300 glycogen storage disease ii;
NP_001073272.1	BGIBMGA013995	0.24	537	1e-23	FBpp0070058	232300 glycogen storage disease ii;
BAD92104.1	BGIBMGA010888	0.38	909	8e-159	FBpp0071526	232400 glycogen storage disease iii;
NP_000149.3	BGIBMGA007451	0.6	647	0	FBpp0086845	232500 glycogen storage disease iv;
NP_001191.1	BGIBMGA010384	0.41	343	3e-69	FBpp0077451	235200 html::element=hash(0x1a57448);
NP_055610.1	BGIBMGA002551	0.65	102	3e-32	FBpp0085063	235730 mowat-wilson syndrome; mows;
NP_001171480.1	BGIBMGA000065	0.52	317	1e-82	FBpp0309380	236200 homocystinuria due to cystathionine beta-synthase deficiency;
NP_001171480.1	BGIBMGA004935	0.44	299	1e-69	FBpp0309380	236200 homocystinuria due to cystathionine beta-synthase deficiency;
NP_001171480.1	BGIBMGA005174	0.64	161	7e-52	FBpp0309380	236200 homocystinuria due to cystathionine beta-synthase deficiency;
NP_001171480.1	BGIBMGA012123	0.35	273	1e-31	FBpp0309380	236200 homocystinuria due to cystathionine beta-synthase deficiency;
BAD92667.1	BGIBMGA003152	0.46	396	4e-105	FBpp0075877	236670 muscular dystrophy-dystroglycanopathy (congenital with brain and eye anomalies), type a, 1; mddga1; 613155 muscular dystrophy-dystroglycanopathy (congenital with mental retardation), type b, 1; mddgb1; 609308 muscular dystrophy-dystroglycanopathy (limb-girdle), type c, 1; mddgc1;
NP_009102.3	BGIBMGA003367	0.3	190	5e-07	FBpp0078450	236670 muscular dystrophy-dystroglycanopathy (congenital with brain and eye anomalies), type a, 1; mddga1; 613155 muscular dystrophy-dystroglycanopathy (congenital with mental retardation), type b, 1; mddgb1; 609308 muscular dystrophy-dystroglycanopathy (limb-girdle), type c, 1; mddgc1;
NP_054859.2	BGIBMGA009112	0.39	529	3e-84	FBpp0078631	242900 immunoosseous dysplasia, schimke type;
NP_777576.1	BGIBMGA009222	0.35	249	2e-32	FBpp0312009	243800 johanson-blizzard syndrome; jbs;
NP_777576.1	BGIBMGA009223	0.37	458	3e-62	FBpp0312009	243800 johanson-blizzard syndrome; jbs;
NP_036276.1	BGIBMGA001942	0.38	690	2e-134	FBpp0309629	244400 ciliary dyskinesia, primary, 1; cild1;
BAF83385.1	BGIBMGA002375	0.26	398	3e-18	FBpp0088424	244400 ciliary dyskinesia, primary, 1; cild1;
BAF83385.1	BGIBMGA006633	0.22	490	3e-33	FBpp0072685	244400 ciliary dyskinesia, primary, 1; cild1;
BAF83385.1	BGIBMGA012166	0.21	356	5e-07		244400 ciliary dyskinesia, primary, 1; cild1;
NP_036332.2	BGIBMGA008529	0.48	231	1e-55	FBpp0070612	245600 multiple joint dislocations, short stature, craniofacial dysmorphism, and congenital heart defects;
NP_036332.2	BGIBMGA012266	0.43	244	3e-43	FBpp0079439	245600 multiple joint dislocations, short stature, craniofacial dysmorphism, and congenital heart defects;
AAC39573.1	BGIBMGA004998	0.37	842	4e-156	FBpp0297164	248510 mannosidosis, beta a, lysosomal; mansb;
NP_000245.2	BGIBMGA004208	0.25	310	1e-10	FBpp0309710	250940 homocystinuria-megaloblastic anemia, cblg complementation type; hmag; 190685 down syndrome; 601634 neural tube defects, folate-sensitive;
NP_077025.2	BGIBMGA011394	0.56	142	1e-39	FBpp0303475	252010 mitochondrial complex i deficiency;
NP_004541.1	BGIBMGA002989	0.59	412	8e-139	FBpp0305832	252010 mitochondrial complex i deficiency;
NP_066552.2	BGIBMGA003691	0.55	166	2e-48	FBpp0309486	252010 mitochondrial complex i deficiency;
NP_054884.1	BGIBMGA004494	0.37	170	3e-23	FBpp0081683	252010 mitochondrial complex i deficiency;
CAA43412.1	BGIBMGA005568	0.49	715	0	FBpp0071129	252010 mitochondrial complex i deficiency;
NP_079428.2	BGIBMGA006973	0.34	214	4e-34	FBpp0077868	252010 mitochondrial complex i deficiency;
NP_079428.2	BGIBMGA007944	0.5	268	5e-66	FBpp0306285	252010 mitochondrial complex i deficiency;
NP_004997.4	BGIBMGA008957	0.62	720	0	FBpp0071129	252010 mitochondrial complex i deficiency;
NP_004541.1	BGIBMGA011131	0.78	412	0	FBpp0305832	252010 mitochondrial complex i deficiency;
CAG33209.1	BGIBMGA011870	0.61	245	1e-83	FBpp0309486	252010 mitochondrial complex i deficiency;
NP_783313.1	BGIBMGA012632	0.33	129	3e-13	FBpp0071459	252010 mitochondrial complex i deficiency;
NP_079428.2	BGIBMGA014474	0.39	231	9e-42	FBpp0080448	252010 mitochondrial complex i deficiency;
NP_000190.1	BGIBMGA005529	0.56	415	2e-136	FBpp0083138	252900 mucopolysaccharidosis type iiia;
AAC50513.1	BGIBMGA009235	0.41	663	1e-142	FBpp0304313	252920 mucopolysaccharidosis type iiib;
NP_689632.2	BGIBMGA001270	0.39	384	6e-73	FBpp0310139	252930 mucopolysaccharidosis type iiic;
NP_689632.2	BGIBMGA004220	0.4	389	3e-81	FBpp0310139	252930 mucopolysaccharidosis type iiic;
NP_002067.1	BGIBMGA007568	0.44	100	9e-14	FBpp0306755	252940 mucopolysaccharidosis type iiid;
BAD97204.1	BGIBMGA007569	0.44	208	5e-40	FBpp0306755	252940 mucopolysaccharidosis type iiid;
NP_002067.1	BGIBMGA007570	0.42	80	2e-09	FBpp0306755	252940 mucopolysaccharidosis type iiid;
BAF84460.1	BGIBMGA012952	0.46	479	6e-112	FBpp0086833	252940 mucopolysaccharidosis type iiid;
AAA51779.1	BGIBMGA001098	0.43	288	4e-67	FBpp0290455	253200 mucopolysaccharidosis type vi;
AAA51779.1	BGIBMGA012509	0.34	388	7e-55	FBpp0290455	253200 mucopolysaccharidosis type vi;
BAG37417.1	BGIBMGA012510	0.3	314	1e-28	FBpp0290455	253200 mucopolysaccharidosis type vi;
AAA51779.1	BGIBMGA012511	0.38	336	1e-58	FBpp0290455	253200 mucopolysaccharidosis type vi;
AAA51779.1	BGIBMGA012512	0.36	172	3e-23	FBpp0290455	253200 mucopolysaccharidosis type vi;
NP_000172.2	BGIBMGA005500	0.43	498	1e-120	FBpp0309401	253220 mucopolysaccharidosis type vii;
NP_056109.1	BGIBMGA002780	0.66	445	8e-173		253250 mulibrey nanism;
[truncated: 355 more rows]

## Sheet: Respiratory
Table S1-4. Respiratory disease.
Accession numbers of human genes	SilkDB ID	Identity	Alignment residues amino acid length	Evalue	Drosophila melanogaster orthologs	Disorder
[truncated: 548 more rows]

## Sheet: Chest
Table S1-5. Chest disease.
[truncated: 454 more rows]

[truncated: 13 more sheets: Abdomen, Genitourinary, Skeletal, Skin nails hair, Muscle soft tissue, Neurologic, Voice, Metabolic features, Endocrine features, Hematology, Immunology, Neoplasia, Prenatal manifestations]
